# Supplementary material for: A metal-free sigmatropic rearrangement/cyclization/aromatization cascade reaction of hydroxy/aminophenyl propargyl alcohols with fluoroalkanesulfinyl chlorides: synthesis of 3-fluoroalkanesulfonyl benzofurans and indoles
Source: Royal Society of Chemistry journal article supplement (doi:10.1039/d5qo00107b), 2025-01-01

## Supporting Information

### Metal-free sigmatropic rearrangement/cyclization/aromatization cascade reaction of hydroxy/aminophenyl propargyl alcohols with fluoroalkanesulfinyl chlorides: Synthesis of 3-fluoroalkanesulfonyl benzofurans and indoles

Si-Jing Jiang,<sup>a,†</sup> Zhao-Zhao Li,<sup>a,‡</sup> Li-Na Yang,<sup>a</sup> Ming Bian,<sup>a</sup> Xiao-Han Qiu,<sup>a</sup> Yu-Ning Gao,<sup>a</sup> Hui-Yu Chen<sup>\*a</sup> and Zhen-Jiang Liu<sup>\*a</sup>

<sup>a</sup>School of Chemical and Environmental Engineering, Shanghai Institute of Technology, 100 Haiquan Road, Shanghai 201418, P. R. China  
Fax: (+86)-21- 60877231; Tel: (+86)-21- 60877227; E-mail: zjliu@sit.edu.cn; chenhuiyu@sit.edu.cn

#### Table of Contents

|                                                                                                                           |    |
|---------------------------------------------------------------------------------------------------------------------------|----|
| General information.....                                                                                                  | 2  |
| Screening of reaction conditions .....                                                                                    | 2  |
| General procedure for the synthesis of <i>o</i> -hydroxyphenyl propargylic alcohols .....                                 | 3  |
| General procedure for the synthesis of <i>o</i> -aminophenyl propargylalcohols.....                                       | 4  |
| General procedure for the synthesis of 2-propynolphenol/2-propynolaniline .....                                           | 5  |
| General procedure for the synthesis of 2-alkyl-3-fluoroalkanesulfonyl benzofurans.....                                    | 5  |
| General procedure for the synthesis of 2-alkyl-3-fluoroalkanesulfonyl indoles.....                                        | 6  |
| Gram-scale experiment.....                                                                                                | 7  |
| Product derivatization.....                                                                                               | 8  |
| Spectra data of compounds <b>3a-3z</b> , <b>3aa</b> , <b>3ab</b> , <b>5a-5v</b> , <b>7</b> , <b>9</b> and <b>10</b> ..... | 9  |
| Crystallography of 2-alkyl-3-fluoroalkanesulfonyl benzofuran <b>3a</b> .....                                              | 21 |
| References .....                                                                                                          | 23 |
| Copies of NMR spectra .....                                                                                               | 24 |

## General information

All moisture or oxygen-sensitive reactions were carried out in a nitrogen atmosphere with dry solvents under anhydrous conditions, unless otherwise noted. The solvents used were purified by distillation over the drying agents indicated and were transferred under nitrogen: THF (Na), CH<sub>2</sub>Cl<sub>2</sub> (CaH<sub>2</sub>), toluene (Na), ClCH<sub>2</sub>CH<sub>2</sub>Cl (CaH<sub>2</sub>), CH<sub>3</sub>CN (CaH<sub>2</sub>). Reagents were purchased at commercial quality and used without further purification. All reactions were monitored by thin-layer chromatography carried out on 0.25 mm Rushan silica gel plates (GF254) and visualized by exposure to UV light (254 nm) or KMnO<sub>4</sub>. The products were purified by column chromatography on silica gel (300–400 meshes) from Qing Dao Hai Yang Chemical Industry Company in China. <sup>1</sup>H NMR, <sup>13</sup>C NMR and <sup>19</sup>F NMR spectra were measured in CDCl<sub>3</sub> on a China Qone AS400 MHz instrument (resonance frequencies 400 MHz for <sup>1</sup>H and 100 MHz for <sup>13</sup>C) or Bruker Advance III 400 MHz instrument (resonance frequencies 400 MHz for <sup>1</sup>H and 100 MHz for <sup>13</sup>C), with TMS as internal standard. All chemical shifts are reported in ppm scale. The following abbreviations were used to explain the multiplicities: s = singlet, d = doublet, t = triplet, q = quartet, td = triple doublet, dt = double triplet, m = multiplet. Mass spectrometric data were obtained using a Bruker Solaril X70 high resolution mass spectrometer (samples were dissolved in CH<sub>3</sub>OH and the ion source was ESI). The IR spectra were recorded on a PerkinElmer Spectrum TWO. The melting point were recorded on a WRS-1B digital melting-point apparatus.

## Screening of reaction conditions

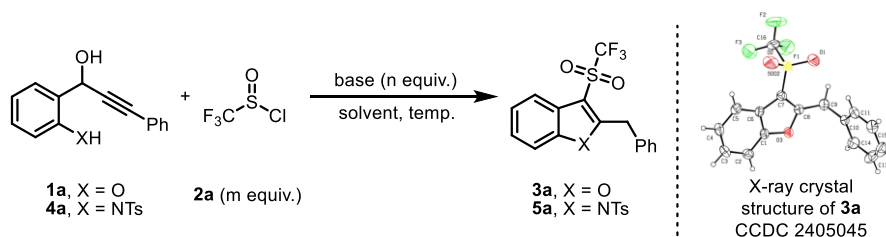

To a 10 mL Schlenk tube, equipped with a magnetic stir bar, was added *o*-hydroxyphenyl propargylic alcohol **1a** (45 mg, 0.2 mmol) or *o*-aminophenyl propargylic alcohol **4a** (75 mg, 0.2 mmol), base, and solvent (3 mL) followed by trifluoromethanesulfinyl chloride **2a**. The reaction mixture was heated in an oil bath at indicated temperature under a nitrogen atmosphere and monitored by TLC. Upon completion, the reaction mixture was cooled to room temperature and quenched with saturated aqueous NH<sub>4</sub>Cl solution. The aqueous phase was extracted with EtOAc (10 mL × 3). The organic extracts were combined and washed with brine, dried over anhydrous Na<sub>2</sub>SO<sub>4</sub>, and evaporated under vacuum. The residue was purified by column chromatography on silica gel (petroleum ether/EtOAc = 50:1) to give the final product.

Table S1. Screening of reaction conditions<sup>a</sup>

| entry | X | base    | solvent | m   | n   | temp (°C) | time (h) | yield (%) <sup>b</sup> |
|-------|---|---------|---------|-----|-----|-----------|----------|------------------------|
| 1     | O | 2-Me-py | THF     | 1.5 | 1.5 | 40        | 24       | 50                     |
| 2     | O | 2-Me-py | DCM     | 1.5 | 1.5 | 40        | 10       | 60                     |
| 3     | O | 2-Me-py | ACN     | 1.5 | 1.5 | 40        | 10       | 65                     |
| 4     | O | 2-Me-py | toluene | 1.5 | 1.5 | 40        | 3        | 83                     |
| 5     | O | 2-Me-py | toluene | 1.0 | 1.5 | 40        | 20       | 70                     |
| 6     | O | 2-Me-py | toluene | 1.2 | 1.5 | 40        | 9        | 79                     |

|    |     |              |         |     |     |    |     |    |
|----|-----|--------------|---------|-----|-----|----|-----|----|
| 7  | O   | 2-Me-py      | toluene | 2.0 | 1.5 | 40 | 3   | 55 |
| 8  | O   | 2-Me-py      | toluene | 1.5 | 1.0 | 40 | 3   | 61 |
| 9  | O   | 2-Me-py      | toluene | 1.5 | 1.2 | 40 | 3   | 75 |
| 10 | O   | 2-Me-py      | toluene | 1.5 | 2.0 | 40 | 3   | 79 |
| 11 | O   | 2-Me-py      | toluene | 1.2 | 1.2 | 40 | 9   | 65 |
| 12 | O   | 2-Me-py      | toluene | 2.0 | 2.0 | 40 | 9   | 49 |
| 13 | O   | 2-Me-py      | toluene | 3.0 | 3.0 | 40 | 9   | 46 |
| 14 | O   | pyridine     | toluene | 1.5 | 1.5 | 40 | 10  | 35 |
| 15 | O   | 2,6-lutidine | toluene | 1.5 | 1.5 | 40 | 10  | 80 |
| 16 | O   | morpholine   | toluene | 1.5 | 1.5 | 40 | 3   | 41 |
| 17 | O   | piperidine   | toluene | 1.5 | 1.5 | 40 | 3   | 30 |
| 18 | O   | imidazole    | toluene | 1.5 | 1.5 | 40 | 3   | 7  |
| 19 | O   | DMAP         | toluene | 1.5 | 1.5 | 40 | 3   | 65 |
| 20 | O   | DABCO        | toluene | 1.5 | 1.5 | 40 | 3   | 85 |
| 21 | O   | DABCO        | toluene | 1.5 | 1.5 | rt | 3   | 70 |
| 22 | O   | DABCO        | toluene | 1.5 | 1.5 | 50 | 1   | 96 |
| 23 | O   | DABCO        | toluene | 1.5 | 1.5 | 60 | 1   | 91 |
| 24 | O   | /            | toluene | 1.5 | 1.5 | 40 | 3   | 0  |
| 25 | NTs | DABCO        | toluene | 1.5 | 1.5 | 50 | 0.5 | 79 |
| 26 | NTs | DABCO        | toluene | 1.5 | 2.0 | 50 | 0.5 | 88 |
| 27 | NTs | DABCO        | toluene | 1.5 | 2.0 | 70 | 0.5 | 80 |

<sup>a</sup>Reaction conditions: compounds **1a** or **4a** (0.2 mmol), **2a** and base were stirred in solvent (3 mL) at indicated temperature; <sup>b</sup>Yield of the isolated product.

### General procedure for the synthesis of *o*-hydroxyphenyl propargylic alcohols

*o*-Hydroxyphenyl propargylic alcohols **1** were prepared according to the reported literature.<sup>[1]</sup> General synthetic route of propargylic alcohols **1** is shown below.

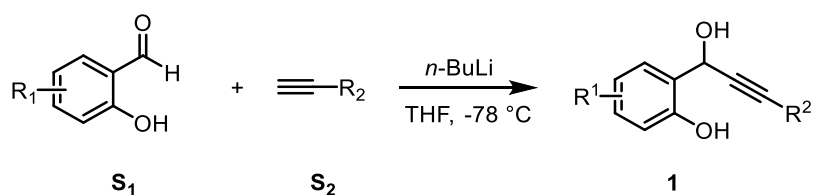

To the solution of **S<sub>2</sub>** (22 mmol, 2.2 equiv.) in dry THF (30 mL) was slowly added *n*-BuLi (22 mmol, 2.5 M in THF, 2.2 equiv.) at -78 °C under nitrogen atmosphere. The reaction mixture was stirred at this temperature for 1 h, then a solution of the corresponding salicylaldehyde **S<sub>1</sub>** (10 mmol, 1.0 equiv.) in 4 mL of THF was added dropwise via a cannula. The reaction mixture was stirred at -78 °C for another 1-1.5 h until the disappearance of the starting material indicated by TLC (thin-layer chromatography) analysis. Then the reaction mixture was quenched with saturated aqueous NH<sub>4</sub>Cl solution and THF was removed under vacuum. The resulting aqueous phase was extracted with EtOAc (30 mL × 3). The combined organic layers were washed with water (30 mL) and brine (30 mL), dried over anhydrous Na<sub>2</sub>SO<sub>4</sub>, and evaporated under vacuum. The residue was purified by column chromatography (petroleum ether/EtOAc = 10/1) or by crystallization with petroleum ether to give **1**. The spectral data was in accordance with the reported data.<sup>[1]</sup>

### General procedure for the synthesis of *o*-aminophenyl propargylalcohols

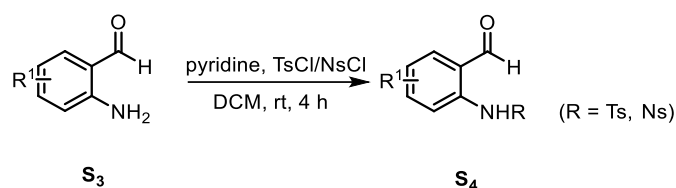

*o*-Aminophenyl propargylalcohols were prepared according to known procedures.<sup>[2]</sup> To an egg-shaped flask was added 2-aminobenzaldehydes **S**<sub>3</sub> (10 mmol, 1.0 equiv.), DCM (25 mL) and pyridine (13 mmol, 1.3 equiv.). Then TsCl or NsCl (12 mmol, 1.2 equiv.) was added to the above mixture under 0 °C and stirred at room temperature for about 4 h. The reaction was monitored by TLC. Upon completion, the mixture was quenched with water and extracted with DCM (30 mL × 3). The combined organic extracts were washed with water (30 mL) and brine (30 mL), dried over Na<sub>2</sub>SO<sub>4</sub> and concentrated in vacuo. The residue was purified by column chromatography on silica gel (petroleum ether/EtOAc = 10:1 to 5:1) to afford **S**<sub>4</sub>.

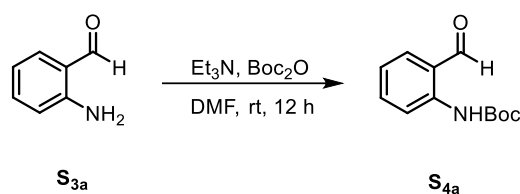

To an egg-shaped flask was added 2-aminobenzaldehydes **S**<sub>3a</sub> (10 mmol, 1.0 equiv.), DMF (25 mL) and Et<sub>3</sub>N (30 mmol, 3 equiv.). Then Boc<sub>2</sub>O (12 mmol, 1.2 equiv.) was added to the above mixture under 0 °C and stirred at room temperature for 12 h. The reaction was monitored by TLC. Upon completion, the mixture was quenched with water and extracted with DCM (30 mL × 4). The combined organic extracts were washed with water (30 mL × 3) and brine (30 mL), dried over Na<sub>2</sub>SO<sub>4</sub> and concentrated in vacuo. The residue was purified by column chromatography on silica gel (petroleum ether/EtOAc = 5:1) to afford **S**<sub>4a</sub>.

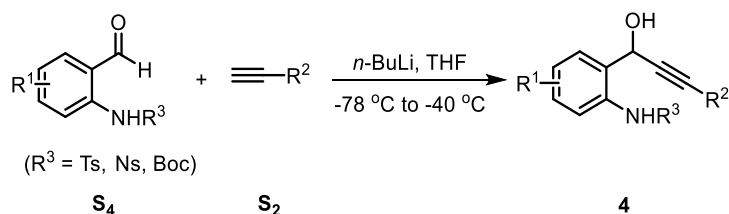

To a solution of **S**<sub>2</sub> (5.5 mmol, 2.2 equiv.) in THF (5 mL) was added *n*-BuLi dropwise (5.5 mmol, 2.5 M in THF, 2.2 equiv.) at -78 °C under nitrogen atmosphere. Then the mixture was stirred for 10 min at -78 °C. The mixture was warmed to -40 °C and allowed to continue for another 1 h. After that, the system was cooled down to -78 °C and a solution of **S**<sub>4</sub> (2.5 mmol, 1.0 equiv.) in THF (4 mL) was added slowly to the above mixture. The reaction was stirred for 1 h at -78 °C and warmed to room temperature while stirring for another 1 h (monitored by TLC). Upon completion, the reaction mixture was quenched with saturated NH<sub>4</sub>Cl solution, and extracted with EtOAc (20 mL × 3) after removal of THF under vacuum. The combined organic extracts were washed with water (20 mL) and brine (20 mL), dried over Na<sub>2</sub>SO<sub>4</sub>, and concentrated in vacuo. The residue was purified by column chromatography on silica gel (petroleum ether/EtOAc = 10:1 to 5:1) to afford **4**. The spectral data was in accordance with the reported data.<sup>[2]</sup>

### General procedure for the synthesis of 2-propynolphenol/2-propynolaniline

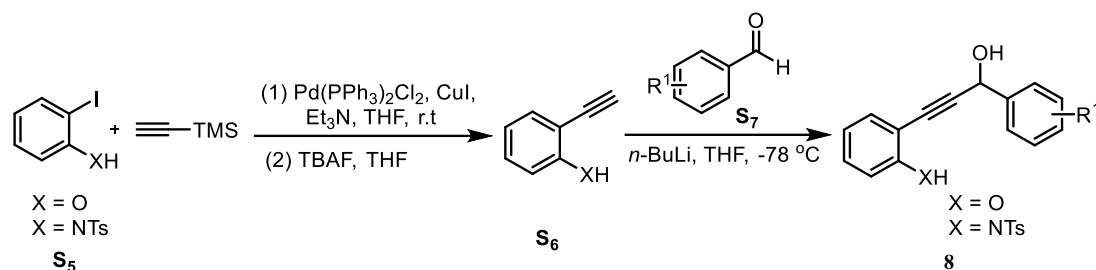

To a solution of compound **S**<sub>5</sub> (10.0 mmol) in THF (30 mL) and Et<sub>3</sub>N (20.0 mmol, 2.8 mL) was added copper iodide (0.2 mmol, 0.038 g), Pd (PPh<sub>3</sub>)<sub>2</sub>Cl<sub>2</sub> (0.1 mmol, 0.07 g), and ethynyltrimethylsilane (12.0 mmol, 1.7 mL). The reaction was stirred at room temperature (rt) for about 18 h and the progress of the reaction was monitored by TLC. Upon completion, the solution was then filtered and concentrated under a reduced pressure.<sup>[3]</sup> The TBAF (12.0 mmol, 1.0 M in THF) was slowly added to a stirred solution of the above compound in dry THF (30 mL) at 0 °C. The resulting mixture was then stirred at rt and the progress of the reaction was monitored by TLC. Upon completion, the reaction mixture was quenched with saturated NH<sub>4</sub>Cl solution, and extracted with EtOAc (20 mL×3) after removal of THF under vacuum. The combined organic extracts were washed with water (20 mL) and brine (20 mL), dried over Na<sub>2</sub>SO<sub>4</sub>, and concentrated in vacuo. The residue was purified by column chromatography on silica gel (petroleum ether/EtOAc, 50-78%, 2 steps) to afford **S**<sub>6</sub>.

To a solution of **S**<sub>6</sub> (5.5 mmol, 2.2 equiv.) in THF (5 mL) was added *n*-BuLi dropwise (5.5 mmol, 2.5 M in THF, 2.2 equiv.) at -78 °C under nitrogen atmosphere. Then the mixture was stirred for 10 min at -78 °C. The mixture was warmed to -40 °C and allowed to continue for another 1 h. After that, the system was cooled down to -78 °C and a solution of **S**<sub>7</sub> (2.5 mmol, 1.0 equiv.) in THF (4 mL) was added slowly to the above mixture. The reaction was stirred for 1 h at -78 °C and warmed to room temperature while stirring for another 1 h (monitored by TLC). Upon completion, the reaction mixture was quenched with saturated NH<sub>4</sub>Cl solution, and extracted with EtOAc (20 mL×3) after removal of THF under vacuum. The combined organic extracts were washed with water (20 mL) and brine (20 mL), dried over Na<sub>2</sub>SO<sub>4</sub>, and concentrated in vacuo. The residue was purified by column chromatography on silica gel (petroleum ether/EtOAc = 10:1) to afford **8**.

### General procedure for the synthesis of 2-alkyl-3-fluoroalkanesulfonyl benzofurans

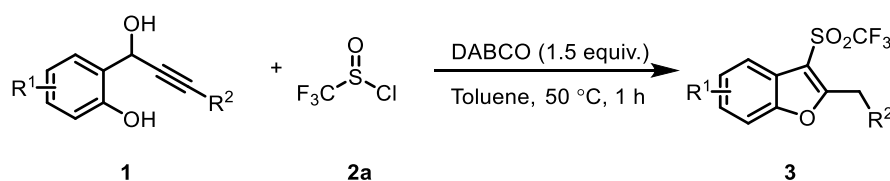

To a 10 mL Schlenk tube, equipped with a magnetic stir bar, was added *o*-hydroxyphenyl propargylic alcohols **1** (0.2 mmol), DABCO (0.3 mmol), and toluene (3 mL) followed by CF<sub>3</sub>SOCl **2a** (0.3 mmol). The reaction mixture was stirred at 50 °C under a nitrogen atmosphere for 1 hours and monitored by TLC. Upon completion, the reaction mixture was cooled to room temperature and quenched with saturated aqueous NH<sub>4</sub>Cl solution. The aqueous phase was extracted with EtOAc (10 mL × 3). The organic extracts were combined and washed with brine, dried over anhydrous Na<sub>2</sub>SO<sub>4</sub>, and

evaporated under vacuum. The residue was purified by column chromatography on silica gel (petroleum ether/EtOAc = 50:1) to give products **3**.

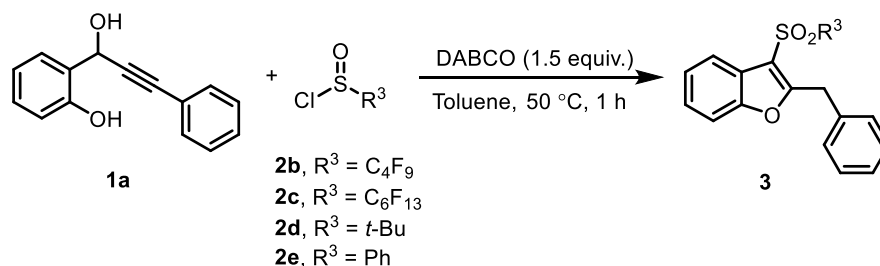

To a 10 mL Schlenk tube, equipped with a magnetic stir bar, was added *o*-hydroxyphenyl propargylic alcohols **1a** (0.2 mmol), DABCO (0.3 mmol), and toluene (3 mL) followed by **2** (0.3 mmol). The reaction mixture was stirred at 50 °C under a nitrogen atmosphere for 1 hours and monitored by TLC. Upon completion, the reaction mixture was cooled to room temperature and quenched with saturated aqueous  $\text{NH}_4\text{Cl}$  solution. The aqueous phase was extracted with EtOAc (10 mL  $\times$  3). The organic extracts were combined and washed with brine, dried over anhydrous  $\text{Na}_2\text{SO}_4$ , and evaporated under vacuum. The residue was purified by column chromatography on silica gel (petroleum ether/EtOAc = 50:1) to give products **3y**, **3z**, **3aa** and **3ab**.

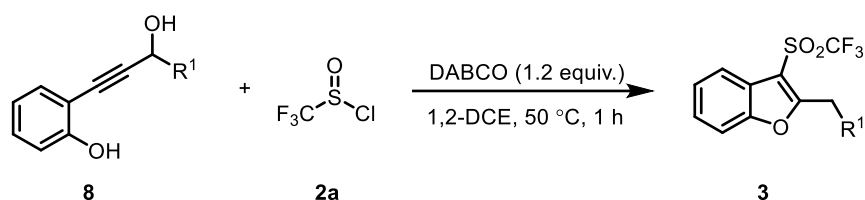

To a 10 mL Schlenk tube, equipped with a magnetic stir bar, was added *o*-hydroxyphenyl propargylic alcohols **8** (0.2 mmol), DABCO (0.24 mmol), and 1,2-DCE (3 mL) followed by  $\text{CF}_3\text{SOCl}$  **2a** (0.3 mmol). The reaction mixture was stirred at 50 °C under a nitrogen atmosphere for 1 hours and monitored by TLC. Upon completion, the reaction mixture was cooled to room temperature and quenched with saturated aqueous  $\text{NH}_4\text{Cl}$  solution. The aqueous phase was extracted with EtOAc (10 mL  $\times$  3). The organic extracts were combined and washed with brine, dried over anhydrous  $\text{Na}_2\text{SO}_4$ , and evaporated under vacuum. The residue was purified by column chromatography on silica gel (petroleum ether/EtOAc = 50:1) to give products **3a**, **3l-3n**.

#### General procedure for the synthesis of 2-alkyl-3-fluoroalkanesulfonyl indoles

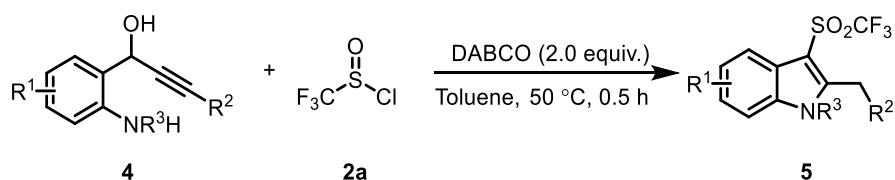

To a 10 mL Schlenk tube, equipped with a magnetic stir bar, was added *o*-aminophenyl propargylic alcohols **4** (0.2 mmol), DABCO (0.4 mmol), and toluene (3 mL) followed by  $\text{CF}_3\text{SOCl}$  **2a** (0.3 mmol). The reaction mixture was stirred at 50 °C under a nitrogen atmosphere for 30 min and monitored by TLC. Upon completion, the reaction mixture was cooled to room temperature and quenched with saturated aqueous  $\text{NH}_4\text{Cl}$  solution. The aqueous phase was extracted with EtOAc (10 mL  $\times$  3). The organic extracts were combined and washed with brine, dried over anhydrous  $\text{Na}_2\text{SO}_4$ , and evaporated

under vacuum. The residue was purified by column chromatography on silica gel (petroleum ether/EtOAc = 50:1) to give products **5**.

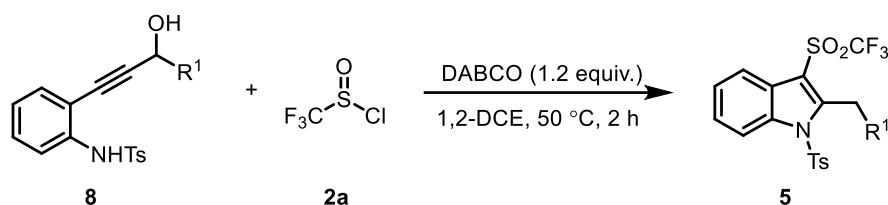

To a 10 mL Schlenk tube, equipped with a magnetic stir bar, was added *o*-aminophenyl propargylalcohols **8** (0.2 mmol), DABCO (0.24 mmol), and 1,2-DCE (3 mL) followed by CF<sub>3</sub>SOCl **2a** (0.3 mmol). The reaction mixture was stirred at 50 °C under a nitrogen atmosphere for 2 hours and monitored by TLC. Upon completion, the reaction mixture was cooled to room temperature and quenched with saturated aqueous NH<sub>4</sub>Cl solution. The aqueous phase was extracted with EtOAc (10 mL × 3). The organic extracts were combined and washed with brine, dried over anhydrous Na<sub>2</sub>SO<sub>4</sub>, and evaporated under vacuum. The residue was purified by column chromatography on silica gel (petroleum ether/EtOAc = 50:1) to give products **5a**, **5j**.

### Gram-scale experiment

#### Scale-up preparation of **3a**

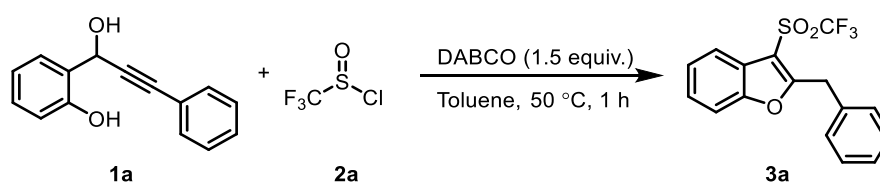

To a 100 mL round-bottom flask, equipped with a stir bar and condenser, was added *o*-hydroxyphenyl propargylic alcohol **1a** (1.12 g, 5.00 mmol, 1.0 equiv.), DABCO (0.84g, 7.5 mmol, 1.5 equiv.), and toluene (20 mL) followed by CF<sub>3</sub>SOCl **2a** (0.62 ml, 7.5 mmol, 1.5 equiv.) The reaction mixture was stirred at 50 °C under a nitrogen atmosphere for 1 hours and monitored by TLC. Upon completion, the reaction mixture was cooled to room temperature and quenched with saturated aqueous NH<sub>4</sub>Cl solution. The aqueous phase was extracted with EtOAc (10 mL × 3). The organic extracts were combined and washed with brine, dried over anhydrous Na<sub>2</sub>SO<sub>4</sub>, and evaporated under vacuum. The residue was purified by column chromatography on silica gel (petroleum ether/EtOAc = 50:1) to give product **3a** in 91% yield (1.55 g, 4.55 mmol).

#### Scale-up preparation of **5a**

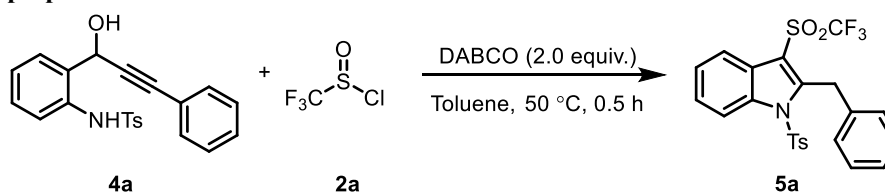

To a 100 mL round-bottom flask, equipped with a stir bar and condenser, was added *o*-hydroxyphenyl propargylic alcohol **1a** (1.13 g, 3.00 mmol, 1.0 equiv.), DABCO (0.67g, 6.0 mmol, 2.0 equiv.), and toluene (20 mL) followed by CF<sub>3</sub>SOCl **2a** (0.37 ml, 4.5 mmol, 1.5 equiv.) The reaction mixture was stirred at 50 °C under a nitrogen atmosphere for 30 min and monitored by TLC. Upon completion, the reaction mixture was cooled to room temperature and quenched with saturated aqueous

NH<sub>4</sub>Cl solution. The aqueous phase was extracted with EtOAc (10 mL × 3). The organic extracts were combined and washed with brine, dried over anhydrous Na<sub>2</sub>SO<sub>4</sub>, and evaporated under vacuum. The residue was purified by column chromatography on silica gel (petroleum ether/EtOAc = 50:1) to give product **5a** in 82% yield (1.21 g, 2.45 mmol)

### Product derivatization

#### Synthesis of compound **9**

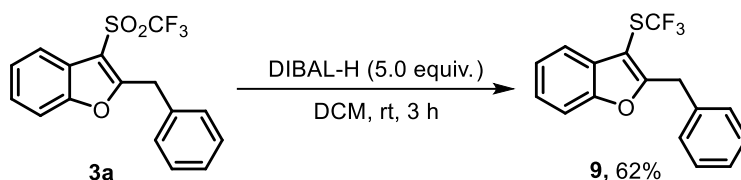

To a solution of compound **3a** (0.4 mmol) in DCM (2 mL). The DIBAL-H (2.0 mmol, 2.0 M in hexane) was slowly added to a stirred solution of the above compound at 0 °C. The resulting mixture was then stirred at rt and the progress of the reaction was monitored by TLC. Upon completion, the mixture was quenched with water and extracted with DCM (30 mL × 4). The combined organic extracts were washed with water (30 mL × 3) and brine (30 mL), dried over Na<sub>2</sub>SO<sub>4</sub> and concentrated in vacuo. The residue was purified by column chromatography on silica gel (petroleum ether/EtOAc = 50:1) to afford **9**.

#### Synthesis of compounds **10**<sup>[4]</sup>

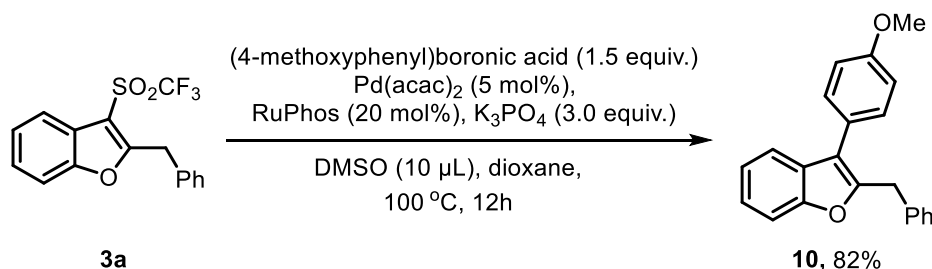

2-Alkyl-3-fluoroalkanesulfonyl benzofurans **3a** (0.3 mmol), (4-methoxyphenyl)boronic acid (0.45 mmol, 1.5 equiv.), Pd(acac)<sub>2</sub> (5 mol%), RuPhos (20 mol%) and K<sub>3</sub>PO<sub>4</sub> (0.9 mmol, 3.0 equiv.) were weighed into a Schlenk tube, sealed, evacuated and backfilled with nitrogen 3 times. Then, 1.0 mL of anhydrous dioxane and 10 μL of DMSO were added. The solutions were stirred and heated at 100 °C for 12 h. The reaction was determined to be complete by TLC. After the reaction was cooled to room temperature, the crude mixture was filtered through a bed of Celite and washed with dichloromethane, dried over Na<sub>2</sub>SO<sub>4</sub> and concentrated in vacuo. The residue was purified by column chromatography on silica gel (petroleum ether/EtOAc = 50:1) to afford **10**.



## Spectra data of compounds 3a-3z, 3aa, 3ab, 5a-5v, 7, 9 and 10

### 2-benzyl-3-((trifluoromethyl)sulfonyl)benzofuran (3a)

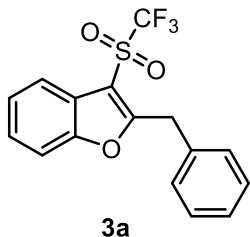

Compound **3a** (96% yield, yellow solid, Melting point: 79.3 – 82.4 °C): **<sup>1</sup>H NMR** (400 MHz, CDCl<sub>3</sub>) δ 7.86 – 7.84 (m, 1H), 7.51 – 7.49 (m, 1H), 7.39–7.36 (m, 4H), 7.35 – 7.32 (m, 2H), 7.29 – 7.25 (m, 1H), 4.50 (s, 2H). **<sup>13</sup>C NMR** (100 MHz, CDCl<sub>3</sub>) δ 168.3, 153.6, 134.4, 129.1, 128.8, 127.4, 126.4, 125.3, 123.6, 120.6, 120.0 (q, *J* = 323 Hz), 111.7, 108.4, 33.3. **<sup>19</sup>F NMR** (376 MHz, CDCl<sub>3</sub>) δ -79.65 (s). **IR:**  $\bar{\nu}$  = 2953, 1298, 1165, 1087, 1062, 735 cm<sup>-1</sup>; **HRMS** (ESI) *m/z*: [M + Na]<sup>+</sup> calcd for C<sub>16</sub>H<sub>11</sub>F<sub>3</sub>NaO<sub>3</sub>S<sup>+</sup> 363.0273; found: 363.0275.

### 2-benzyl-4-methyl-3-((trifluoromethyl)sulfonyl)benzofuran (3b)

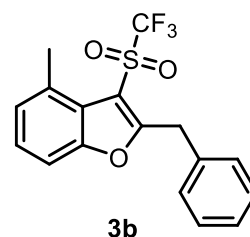

Compound **3b** (83% yield, white solid, Melting point: 107.6 – 110.6 °C): **<sup>1</sup>H NMR** (400 MHz, CDCl<sub>3</sub>) δ 7.39 – 7.36 (m, 2H), 7.34 – 7.31 (m, 3H), 7.29 – 7.23 (m, 2H), 7.16 (d, *J* = 7.6 Hz, 1H), 4.57 (s, 2H), 2.69 (s, 3H). **<sup>13</sup>C NMR** (100 MHz, CDCl<sub>3</sub>) δ 169.7, 154.1, 134.9, 132.5, 129.2, 128.9, 128.8, 128.1, 127.4, 126.2, 121.8, 120.0 (q, *J* = 322 Hz), 109.5, 34.1, 21.3. **<sup>19</sup>F NMR** (376 MHz, CDCl<sub>3</sub>) δ -78.56 (s). **IR:**  $\bar{\nu}$  = 2971, 1366, 1199, 1120, 1062, 743 cm<sup>-1</sup>; **HRMS** (ESI) *m/z*: [M + Na]<sup>+</sup> calcd for C<sub>17</sub>H<sub>13</sub>F<sub>3</sub>NaO<sub>3</sub>S<sup>+</sup> 377.0430; found:

377.0439.

### 2-benzyl-5-methyl-3-((trifluoromethyl)sulfonyl)benzofuran (3c)

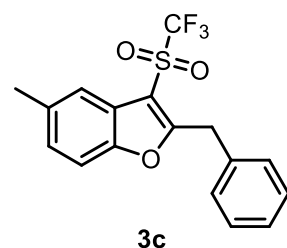

Compound **3c** (97% yield, yellow solid, Melting point: 93.9 – 94.7 °C): **<sup>1</sup>H NMR** (400 MHz, CDCl<sub>3</sub>) δ 7.63 (s, 1H), 7.39 – 7.37 (m, 3H), 7.35 – 7.31 (m, 2H), 7.29 – 7.25 (m, 1H), 7.20 (d, *J* = 8.4 Hz, 1H), 4.48 (s, 2H), 2.46 (s, 3H). **<sup>13</sup>C NMR** (100 MHz, CDCl<sub>3</sub>) δ 168.2, 152.2, 135.4, 134.5, 129.2, 128.9, 127.7, 127.5, 123.8, 120.3, 120.0 (q, *J* = 322 Hz), 111.3, 108.2, 33.5, 21.4. **<sup>19</sup>F NMR** (376 MHz, CDCl<sub>3</sub>) δ -79.70 (s). **IR:**  $\bar{\nu}$  = 2931, 1487, 1362, 1192, 1124, 633 cm<sup>-1</sup>; **HRMS** (ESI) *m/z*: [M + Na]<sup>+</sup> calcd for

C<sub>17</sub>H<sub>13</sub>F<sub>3</sub>NaO<sub>3</sub>S<sup>+</sup> 377.0430; found: 377.0431.

### 2-benzyl-5-methoxy-3-((trifluoromethyl)sulfonyl)benzofuran (3d)

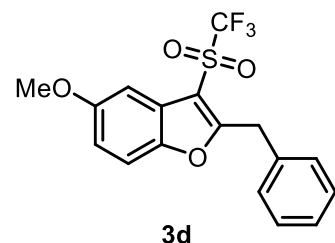

Compound **3d** (96% yield, yellow solid, Melting point: 60.8 – 64.0 °C): **<sup>1</sup>H NMR** (400 MHz, CDCl<sub>3</sub>) δ 7.39 – 7.37 (m, 3H), 7.35 – 7.31 (m, 2H), 7.29 – 7.26 (m, 2H), 6.97 (dd, *J* = 9.2, 2.4 Hz, 1H), 4.47 (s, 2H), 3.84 (s, 3H). **<sup>13</sup>C NMR** (100 MHz, CDCl<sub>3</sub>) δ 168.6, 157.8, 148.5, 134.5, 129.2, 128.9, 127.5, 124.6, 120.0 (q, *J* = 322 Hz), 115.7, 112.5, 108.4, 102.5, 56.0, 33.6. **<sup>19</sup>F NMR** (376 MHz, CDCl<sub>3</sub>) δ -79.72 (s). **IR:**  $\bar{\nu}$  = 3033, 1366, 1185, 1123, 1052 cm<sup>-1</sup>; **HRMS** (ESI) *m/z*: [M + Na]<sup>+</sup> calcd

for C<sub>17</sub>H<sub>13</sub>F<sub>3</sub>NaO<sub>4</sub>S<sup>+</sup> 393.0379; found: 393.0379.

### 2-benzyl-5-chloro-3-((trifluoromethyl)sulfonyl)benzofuran (3e)

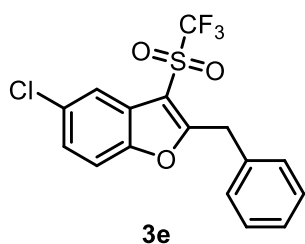

Compound **3e** (92% yield, yellow solid, Melting point: 106.2 – 109.0 °C):  $^1\text{H NMR}$  (400 MHz,  $\text{CDCl}_3$ )  $\delta$  7.83 (d,  $J = 2.0$  Hz, 1H), 7.43 (d,  $J = 8.8$  Hz, 1H), 7.38 – 7.32 (m, 5H), 7.29 (d,  $J = 6.8$  Hz, 1H), 4.49 (s, 2H).  $^{13}\text{C NMR}$  (100 MHz,  $\text{CDCl}_3$ )  $\delta$  169.6, 152.1, 134.0, 131.5, 129.3, 129.0, 127.7, 127.0, 125.2, 120.5, 120.0 (q,  $J = 323$  Hz), 113.0, 108.4, 33.6.  $^{19}\text{F NMR}$  (376 MHz,  $\text{CDCl}_3$ )  $\delta$  -79.57 (s). **IR**:  $\bar{\nu} = 2929, 1554, 1366, 1185, 1131, 750, 656$   $\text{cm}^{-1}$ ; **HRMS** (ESI)  $m/z$ :  $[\text{M} + \text{Na}]^+$  calcd for  $\text{C}_{16}\text{H}_{10}\text{ClF}_3\text{NaO}_3\text{S}^+$  396.9883 (100%), 398.9854 (32%); found: 396.9882, 398.9851.

### 2-benzyl-5-bromo-3-((trifluoromethyl)sulfonyl)benzofuran (3f)

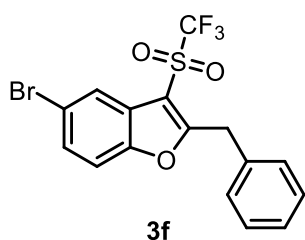

Compound **3f** (90% yield, yellow solid, Melting point: 115.2– 116.7 °C):  $^1\text{H NMR}$  (400 MHz,  $\text{CDCl}_3$ )  $\delta$  7.99 (d,  $J = 2.0$  Hz, 1H), 7.51 (dd,  $J = 8.8, 2.0$  Hz, 1H), 7.39 – 7.32 (m, 5H), 7.31 – 7.27 (m, 1H), 4.49 (s, 2H).  $^{13}\text{C NMR}$  (100 MHz,  $\text{CDCl}_3$ )  $\delta$  169.3, 152.5, 134.0, 129.7, 129.2, 129.0, 127.7, 125.6, 123.4, 119.9 (q,  $J = 323$  Hz), 118.9, 113.3, 108.2, 33.5.  $^{19}\text{F NMR}$  (376 MHz,  $\text{CDCl}_3$ )  $\delta$  -79.55 (s). **IR**:  $\bar{\nu} = 3096, 1544, 1366, 1188, 1064, 814, 603$   $\text{cm}^{-1}$ ; **HRMS** (ESI)  $m/z$ :  $[\text{M} + \text{H}]^+$  calcd for  $\text{C}_{16}\text{H}_{11}\text{BrF}_3\text{O}_3\text{S}^+$  418.9559 (100%), 420.9539 (97%); found: 418.9556, 420.9538.

### 2-benzyl-5-nitro-3-((trifluoromethyl)sulfonyl)benzofuran (3g)

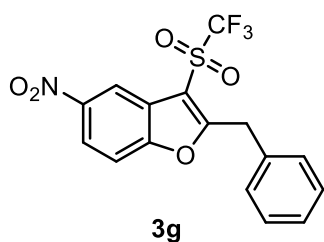

Compound **3g** (49% yield, yellow solid, Melting point: 125.1 – 125.9 °C):  $^1\text{H NMR}$  (400 MHz,  $\text{CDCl}_3$ )  $\delta$  8.75 (d,  $J = 2.4$  Hz, 1H), 8.34 (dd,  $J = 9.2, 2.4$  Hz, 1H), 7.66 (d,  $J = 9.2$  Hz, 1H), 7.41 – 7.37 (m, 3H), 7.35 – 7.30 (m, 2H), 4.55 (s, 2H).  $^{13}\text{C NMR}$  (100 MHz,  $\text{CDCl}_3$ )  $\delta$  171.3, 156.0, 145.8, 133.4, 129.2, 129.1, 127.9, 124.6, 122.3, 119.8 (q,  $J = 322$  Hz), 117.3, 112.7, 109.7, 33.7.  $^{19}\text{F NMR}$  (376 MHz,  $\text{CDCl}_3$ )  $\delta$  -79.35 (s). **IR**:  $\bar{\nu} = 3099, 1525, 1377, 1193, 1128, 1086, 732$   $\text{cm}^{-1}$ ; **HRMS** (ESI)  $m/z$ :  $[\text{M} + \text{Na}]^+$  calcd for  $\text{C}_{16}\text{H}_{10}\text{F}_3\text{NNaO}_5\text{S}^+$  408.0124; found: 408.0122.

### 2-benzyl-6-methyl-3-((trifluoromethyl)sulfonyl)benzofuran (3h)

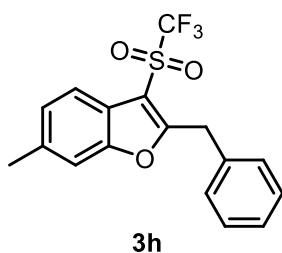

Compound **3h** (96% yield, yellow solid, Melting point: 63.4 – 64.1 °C):  $^1\text{H NMR}$  (400 MHz,  $\text{CDCl}_3$ )  $\delta$  7.71 (d,  $J = 8.0$  Hz, 1H), 7.36 (t,  $J = 7.6$  Hz, 3H), 7.32 (d,  $J = 8.0$  Hz, 2H), 7.28– 7.24 (m, 1H), 7.20 (d,  $J = 8.0$  Hz, 1H), 4.48 (s, 2H), 2.45 (s, 3H).  $^{13}\text{C NMR}$  (100 MHz,  $\text{CDCl}_3$ )  $\delta$  167.6, 154.1, 137.2, 134.6, 129.1, 128.8, 127.4, 126.8, 121.2, 120.1, 120.0 (q,  $J = 322$  Hz), 111.9, 108.4, 33.4, 21.6.  $^{19}\text{F NMR}$  (376 MHz,  $\text{CDCl}_3$ )  $\delta$  -79.73 (s). **IR**:  $\bar{\nu} = 2944, 1532, 1369, 1203, 1062, 743$   $\text{cm}^{-1}$ ; **HRMS** (ESI)  $m/z$ :  $[\text{M} + \text{Na}]^+$  calcd for  $\text{C}_{17}\text{H}_{13}\text{F}_3\text{NaO}_3\text{S}^+$  377.0430; found: 377.0431.

### 2-benzyl-6-methoxy-3-((trifluoromethyl)sulfonyl)benzofuran (3i)

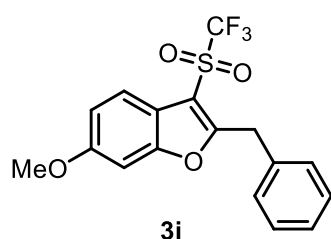

Compound **3i** (95% yield, yellow solid, Melting point: 52.5 – 55.9 °C): <sup>1</sup>H NMR (400 MHz, CDCl<sub>3</sub>) δ 7.69 (d, *J* = 8.8 Hz, 1H), 7.38 – 7.31 (m, 4H), 7.28 (d, *J* = 7.2 Hz, 1H), 6.99 (d, *J* = 8.4 Hz, 2H), 4.46 (s, 2H), 3.83 (s, 3H). <sup>13</sup>C NMR (100 MHz, CDCl<sub>3</sub>) δ 167.0, 159.4, 154.8, 134.7, 129.1, 128.8, 127.4, 120.8, 120.0 (q, *J* = 323 Hz), 116.7, 114.4, 108.4, 96.2, 55.8, 33.4. <sup>19</sup>F NMR (376 MHz, CDCl<sub>3</sub>) δ -79.74 (s). IR:  $\bar{\nu}$  = 3039, 1370, 1199, 1117, 1052, 711 cm<sup>-1</sup>; HRMS (ESI) *m/z*: [M + Na]<sup>+</sup> calcd for C<sub>17</sub>H<sub>13</sub>F<sub>3</sub>NaO<sub>4</sub>S<sup>+</sup> 393.0379; found: 393.0375.

### 2-benzyl-7-methyl-3-((trifluoromethyl)sulfonyl)benzofuran (3j)

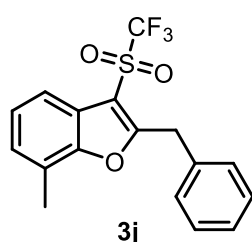

Compound **3j** (95% yield, white solid, Melting point: 113.3 – 115.7 °C): <sup>1</sup>H NMR (400 MHz, CDCl<sub>3</sub>) δ 7.66 (d, *J* = 8.0 Hz, 1H), 7.40 (d, *J* = 6.8 Hz, 2H), 7.33 (t, *J* = 7.2 Hz, 2H), 7.29 – 7.25 (m, 2H), 7.18 (d, *J* = 7.6 Hz, 1H), 4.51 (s, 2H), 2.49 (s, 3H). <sup>13</sup>C NMR (100 MHz, CDCl<sub>3</sub>) δ 167.8, 152.8, 134.6, 129.2, 128.8, 127.4, 127.3, 125.4, 123.3, 122.2, 120.0 (q, *J* = 322 Hz), 118.1, 108.6, 33.5, 14.7. <sup>19</sup>F NMR (376 MHz, CDCl<sub>3</sub>) δ -79.68 (s). IR:  $\bar{\nu}$  = 2989, 1366, 1205, 1134, 712 cm<sup>-1</sup>; HRMS (ESI) *m/z*: [M + Na]<sup>+</sup> calcd for C<sub>17</sub>H<sub>13</sub>F<sub>3</sub>NaO<sub>3</sub>S<sup>+</sup> 377.0430; found: 377.0433.

### 2-benzyl-7-methoxy-3-((trifluoromethyl)sulfonyl)benzofuran (3k)

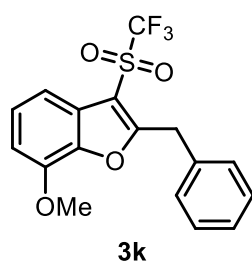

Compound **3k** (96% yield, white solid, Melting point: 105.6 – 107.2 °C): <sup>1</sup>H NMR (400 MHz, CDCl<sub>3</sub>) 7.42 – 7.39 (m, 3H), 7.34 – 7.30 (m, 2H), 7.29 – 7.24 (m, 2H), 6.88 (d, *J* = 8.4 Hz, 1H), 4.50 (s, 2H), 3.97 (s, 3H). <sup>13</sup>C NMR (100 MHz, CDCl<sub>3</sub>) δ 168.1, 145.3, 143.2, 134.5, 129.1, 128.8, 127.4, 126.3, 125.4, 119.9 (q, *J* = 322 Hz), 112.4, 108.8, 108.4, 56.1, 33.4. <sup>19</sup>F NMR (376 MHz, CDCl<sub>3</sub>) δ -79.62 (s). IR:  $\bar{\nu}$  = 3046, 1495, 1367, 1184, 1104, 778 cm<sup>-1</sup>; HRMS (ESI) *m/z*: [M + Na]<sup>+</sup> calcd for C<sub>17</sub>H<sub>13</sub>F<sub>3</sub>NaO<sub>4</sub>S<sup>+</sup> 393.0379; found: 393.0386.

### 2-(4-methylbenzyl)-3-((trifluoromethyl)sulfonyl)benzofuran (3l)

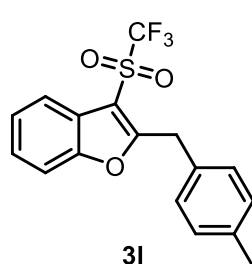

Compound **3l** (98% yield, yellow solid, Melting point: 73.3 – 74.8 °C): <sup>1</sup>H NMR (400 MHz, CDCl<sub>3</sub>) δ 7.86 – 7.84 (m, 1H), 7.51 – 7.48 (m, 1H), 7.41 – 7.36 (m, 2H), 7.28 (d, *J* = 7.6 Hz, 2H), 7.14 (d, *J* = 7.6 Hz, 2H), 4.46 (s, 2H), 2.32 (s, 3H). <sup>13</sup>C NMR (100 MHz, CDCl<sub>3</sub>) δ 168.6, 153.7, 137.2, 131.3, 129.6, 129.1, 126.4, 125.3, 123.8, 120.7, 120.0 (q, *J* = 323 Hz), 111.8, 108.3, 33.1, 21.0. <sup>19</sup>F NMR (376 MHz, CDCl<sub>3</sub>) δ -79.70 (s). IR:  $\bar{\nu}$  = 2956, 1554, 1366, 1189, 1117, 649 cm<sup>-1</sup>; HRMS (ESI) *m/z*: [M + Na]<sup>+</sup> calcd for C<sub>17</sub>H<sub>13</sub>F<sub>3</sub>NaO<sub>3</sub>S<sup>+</sup> 377.0430; found: 377.0433.

### 2-(4-methoxybenzyl)-3-((trifluoromethyl)sulfonyl)benzofuran (3m)

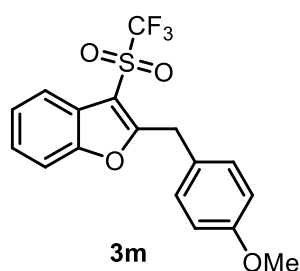

Compound **3m** (97% yield, yellow solid, Melting point: 79.4 – 80.7 °C): <sup>1</sup>H NMR (400 MHz, CDCl<sub>3</sub>) δ 7.84 (dd, *J* = 4.4, 2.4 Hz, 1H), 7.50 – 7.49 (m, 1H), 7.39 – 7.37 (m, 2H), 7.31 (d, *J* = 7.6 Hz, 2H), 6.87 (d, *J* = 6.4 Hz, 2H), 4.44 (s, 2H), 3.77 (s, 3H). <sup>13</sup>C NMR (100 MHz, CDCl<sub>3</sub>) δ 168.7, 159.0, 153.7, 130.3, 126.4, 125.3, 123.8, 120.7, 120.0 (q, *J* = 323 Hz), 114.6, 114.3, 111.7, 108.1, 55.2, 32.6. <sup>19</sup>F NMR (376 MHz, CDCl<sub>3</sub>) δ -79.72 (s). IR:  $\bar{\nu}$  = 2956, 1553, 1367, 1196, 1129, 743 cm<sup>-1</sup>; HRMS (ESI) *m/z*: [M + Na]<sup>+</sup> calcd for C<sub>17</sub>H<sub>13</sub>F<sub>3</sub>NaO<sub>4</sub>S<sup>+</sup> 393.0379; found: 393.0385.

### 2-(4-chlorobenzyl)-3-((trifluoromethyl)sulfonyl)benzofuran (3n)

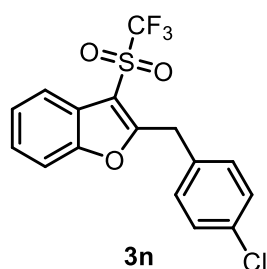

Compound **3n** (95% yield, yellow solid, Melting point: 76.0 – 77.4 °C): <sup>1</sup>H NMR (400 MHz, CDCl<sub>3</sub>) δ 7.86 – 7.84 (m, 1H), 7.52 – 7.50 (m, 1H), 7.43 – 7.37 (m, 2H), 7.34 – 7.29 (m, 4H), 4.47 (s, 2H). <sup>13</sup>C NMR (100 MHz, CDCl<sub>3</sub>) δ 167.5, 153.7, 133.6, 132.8, 130.5, 129.0, 126.6, 125.5, 123.6, 120.7, 120.0 (q, *J* = 322 Hz), 111.8, 108.7, 32.8. <sup>19</sup>F NMR (376 MHz, CDCl<sub>3</sub>) δ -79.68 (s). IR:  $\bar{\nu}$  = 2925, 1555, 1365, 1188, 1130, 802, 750 cm<sup>-1</sup>; HRMS (ESI) *m/z*: [M + Na]<sup>+</sup> calcd for C<sub>16</sub>H<sub>10</sub>ClF<sub>3</sub>NaO<sub>3</sub>S<sup>+</sup> 396.9883 (100%), 398.9854 (32%); found: 396.9880, 398.9856.

### 2-(4-pentylbenzyl)-3-((trifluoromethyl)sulfonyl)benzofuran (3o)

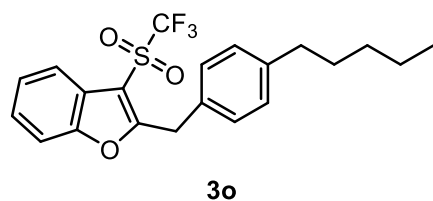

Compound **3o** (82% yield, yellow solid, Melting point: 78.6 – 80.8 °C): <sup>1</sup>H NMR (400 MHz, CDCl<sub>3</sub>) δ 7.86 – 7.84 (m, 1H), 7.52 – 7.49 (m, 1H), 7.41 – 7.36 (m, 2H), 7.30 (d, *J* = 7.6 Hz, 2H), 7.15 (d, *J* = 7.6 Hz, 2H), 4.47 (s, 2H), 2.57 (t, *J* = 7.6 Hz, 2H), 1.63 – 1.57 (m, 2H), 1.35 – 1.26 (m, 4H), 0.88 (t, *J* = 6.8 Hz, 3H). <sup>13</sup>C NMR (100 MHz, CDCl<sub>3</sub>) δ 168.6, 153.7, 142.3, 131.5, 129.1, 128.9, 126.4, 125.3, 123.8, 120.7, 120.0 (q, *J* = 322 Hz), 111.98, 108.3, 35.5, 33.1, 31.5, 31.1, 22.5, 14.0. <sup>19</sup>F NMR (376 MHz, CDCl<sub>3</sub>) δ -79.70 (s). IR:  $\bar{\nu}$  = 2959, 1551, 1367, 1198, 1117, 1056, 647 cm<sup>-1</sup>; HRMS (ESI) *m/z*: [M + Na]<sup>+</sup> calcd for C<sub>21</sub>H<sub>21</sub>F<sub>3</sub>NaO<sub>3</sub>S<sup>+</sup> 433.1056; found: 433.1058.

### 2-(3-methylbenzyl)-3-((trifluoromethyl)sulfonyl)benzofuran (3p)

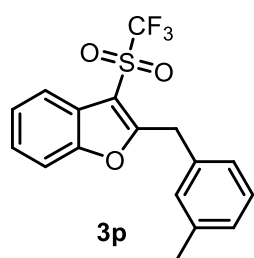

Compound **3p** (97% yield, yellow solid, Melting point: 60.7 – 63.8 °C): <sup>1</sup>H NMR (400 MHz, CDCl<sub>3</sub>) δ 7.86 – 7.84 (m, 1H), 7.52 – 7.49 (m, 1H), 7.41 – 7.36 (m, 2H), 7.21 (d, *J* = 7.6 Hz, 1H), 7.19 – 7.17 (m, 2H), 7.09 (d, *J* = 7.2 Hz, 1H), 4.46 (s, 2H), 2.34 (s, 3H). <sup>13</sup>C NMR (100 MHz, CDCl<sub>3</sub>) δ 168.4, 153.7, 138.6, 134.3, 129.9, 128.7, 128.3, 126.4, 126.2, 125.4, 123.8, 120.7, 120.0 (q, *J* = 323 Hz), 111.8, 108.5, 33.4, 21.3. <sup>19</sup>F NMR (376 MHz, CDCl<sub>3</sub>) δ -79.68 (s). IR:  $\bar{\nu}$  = 2925, 1555, 1369, 1188, 1056, 812 cm<sup>-1</sup>; HRMS (ESI) *m/z*: [M + Na]<sup>+</sup> calcd for C<sub>17</sub>H<sub>13</sub>F<sub>3</sub>NaO<sub>3</sub>S<sup>+</sup> 377.0430; found: 377.0434.

### 2-(2-methylbenzyl)-3-((trifluoromethyl)sulfonyl)benzofuran (3q)

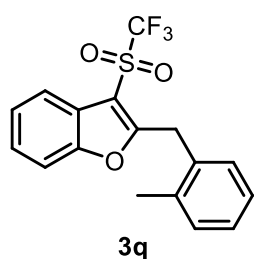

Compound **3q** (95% yield, yellow solid, Melting point: 117.2 – 119.6 °C):  $^1\text{H NMR}$  (400 MHz,  $\text{CDCl}_3$ )  $\delta$  7.88 – 7.86 (m, 1H), 7.48 – 7.45 (m, 1H), 7.40 – 7.38 (m, 2H), 7.22 – 7.20 (m, 2H), 7.19 – 7.14 (m, 2H), 4.54 (s, 2H), 2.43 (s, 3H).  $^{13}\text{C NMR}$  (100 MHz,  $\text{CDCl}_3$ )  $\delta$  168.5, 153.7, 136.7, 132.9, 130.6, 129.8, 127.7, 127.4, 126.4, 125.4, 123.8, 120.7, 120.1 (q,  $J = 323$  Hz), 111.8, 108.7, 31.0, 19.8.  $^{19}\text{F NMR}$  (376 MHz,  $\text{CDCl}_3$ )  $\delta$  -79.56 (s). **IR**:  $\bar{\nu} = 3058, 1547, 1372, 1185, 1132, 750$   $\text{cm}^{-1}$ ; **HRMS** (ESI)  $m/z$ :  $[\text{M} + \text{Na}]^+$  calcd for  $\text{C}_{17}\text{H}_{13}\text{F}_3\text{NaO}_3\text{S}^+$

377.0430; found: 377.0433.

### 2-(naphthalen-2-ylmethyl)-3-((trifluoromethyl)sulfonyl)benzofuran (3r)

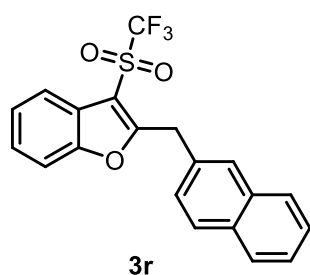

Compound **3r** (76% yield, yellow solid, Melting point: 149.8 – 152.3 °C):  $^1\text{H NMR}$  (400 MHz,  $\text{CDCl}_3$ )  $\delta$  7.86 (dd,  $J = 5.6, 3.2$  Hz, 1H), 7.82 – 7.79 (m, 4H), 7.50 – 7.44 (m, 4H), 7.38 – 7.36 (m, 2H), 4.65 (s, 2H).  $^{13}\text{C NMR}$  (100 MHz,  $\text{CDCl}_3$ )  $\delta$  168.2, 153.7, 133.5, 132.6, 131.8, 128.6, 128.1, 127.7, 127.6, 126.9, 126.5, 126.4, 126.1, 125.4, 123.7, 120.7, 120.0 (q,  $J = 322$  Hz), 111.8., 108.6, 33.6.  $^{19}\text{F NMR}$  (376 MHz,  $\text{CDCl}_3$ )  $\delta$  -79.60 (s). **IR**:  $\bar{\nu} = 3062, 1554, 1367, 1188, 1062, 820, 673$   $\text{cm}^{-1}$ ; **HRMS** (ESI)  $m/z$ :  $[\text{M} + \text{H}]^+$  calcd for  $\text{C}_{20}\text{H}_{14}\text{F}_3\text{O}_3\text{S}^+$  391.0610; found: 391.0609

### 2-(thiophen-2-ylmethyl)-3-((trifluoromethyl)sulfonyl)benzofuran (3s)

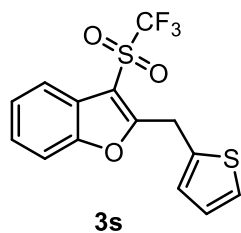

Compound **3s** (83% yield, yellow solid, Melting point: 74.8 – 76.1 °C):  $^1\text{H NMR}$  (400 MHz,  $\text{CDCl}_3$ )  $\delta$  7.87 – 7.85 (m, 1H), 7.56 – 7.52 (m, 1H), 7.45 – 7.38 (m, 2H), 7.23 (dd,  $J = 5.2, 1.2$  Hz, 1H), 7.05 (d,  $J = 3.6$  Hz, 1H), 6.98 – 6.96 (m, 1H), 4.71 (s, 2H).  $^{13}\text{C NMR}$  (100 MHz,  $\text{CDCl}_3$ )  $\delta$  166.8, 153.7, 135.3, 127.4, 127.2, 126.7, 125.5, 123.6, 123.3, 120.8, 119.9 (q,  $J = 322$  Hz), 111.9., 108.4, 27.7.  $^{19}\text{F NMR}$  (376 MHz,  $\text{CDCl}_3$ )  $\delta$  -79.64 (s). **IR**:  $\bar{\nu} = 2993, 1560, 1360,$

1196, 1135, 693  $\text{cm}^{-1}$ ; **HRMS** (ESI)  $m/z$ :  $[\text{M} + \text{Na}]^+$  calcd for  $\text{C}_{14}\text{H}_9\text{F}_3\text{NaO}_3\text{S}_2^+$  368.9837; found: 368.9836.

### 2-pentyl-3-((trifluoromethyl)sulfonyl)benzofuran (3t)

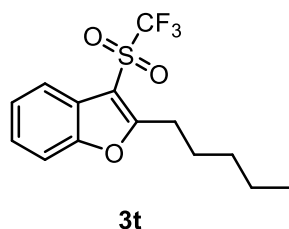

Compound **3t** (81% yield, yellow oil):  $^1\text{H NMR}$  (400 MHz,  $\text{CDCl}_3$ )  $\delta$  7.86 – 7.84 (m, 1H), 7.55 – 7.53 (m, 1H), 7.43 – 7.37 (m, 2H), 3.17 (t,  $J = 8.0$  Hz, 2H), 1.88 – 1.80 (m, 2H), 1.42 – 1.37 (m, 4H), 0.92 (t,  $J = 6.8$  Hz, 3H).  $^{13}\text{C NMR}$  (100 MHz,  $\text{CDCl}_3$ )  $\delta$  171.4, 153.5, 126.1, 125.3, 123.9, 120.5, 120.0 (q,  $J = 322$  Hz), 111.6., 108.0, 31.3, 27.6, 27.5, 22.2, 13.8.  $^{19}\text{F NMR}$  (376 MHz,  $\text{CDCl}_3$ )  $\delta$  -79.96 (s). **IR**:  $\bar{\nu} = 2963, 1556, 1373, 1196, 1139, 749,$

610  $\text{cm}^{-1}$ ; **HRMS** (ESI)  $m/z$ :  $[\text{M} + \text{Na}]^+$  calcd for  $\text{C}_{14}\text{H}_{15}\text{F}_3\text{NaO}_3\text{S}^+$

### 2-neopentyl-3-((trifluoromethyl)sulfonyl)benzofuran (3u)

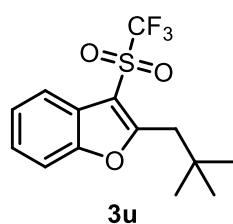

found: 343.0592.

Compound **3u** (55% yield, yellow solid, Melting point: 76.2 – 78.5):  $^1\text{H NMR}$  (400 MHz,  $\text{CDCl}_3$ )  $\delta$  7.88 – 7.86 (m, 1H), 7.57 – 7.55 (m, 1H), 7.44 – 7.38 (m, 2H), 3.10 (s, 2H), 1.12 (s, 9H).  $^{13}\text{C NMR}$  (100 MHz,  $\text{CDCl}_3$ )  $\delta$  169.7, 153.5, 126.3, 125.2, 123.7, 120.7, 120.0 (q,  $J = 323$  Hz), 111.6., 109.8, 40.2, 33.2, 30.0.  $^{19}\text{F NMR}$  (376 MHz,  $\text{CDCl}_3$ )  $\delta$  -79.56 (s). **IR**:  $\bar{\nu} = 3378, 2963, 1453, 1048, 817, 746$   $\text{cm}^{-1}$ ; **HRMS** (ESI)  $m/z$ :  $[\text{M} + \text{Na}]^+$  calcd for  $\text{C}_{14}\text{H}_{15}\text{F}_3\text{NaO}_3\text{S}^+$  343.0586;

### 2-methyl-3-((trifluoromethyl)sulfonyl)benzofuran (3v)

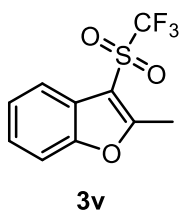

Compound **3v** (80% yield, yellow solid, Melting point: 71.3 – 72.7 °C):  $^1\text{H NMR}$  (400 MHz,  $\text{CDCl}_3$ )  $\delta$  7.84 (d,  $J = 8.0$  Hz, 1H), 7.53 (d,  $J = 7.2$  Hz, 1H), 7.44 – 7.38 (m, 2H), 2.83 (s, 3H).  $^{13}\text{C NMR}$  (100 MHz,  $\text{CDCl}_3$ )  $\delta$  167.6, 153.4, 126.2, 125.3, 123.9, 120.4, 120.1 (q,  $J = 322$  Hz), 111.5, 108.5, 13.9.  $^{19}\text{F NMR}$  (376 MHz,  $\text{CDCl}_3$ )  $\delta$  -80.03 (s). **IR**:  $\bar{\nu} = 2922, 1558, 1358, 1176, 1075, 749$   $\text{cm}^{-1}$ ; **HRMS** (ESI)  $m/z$ :  $[\text{M} + \text{Na}]^+$  calcd for  $\text{C}_{10}\text{H}_7\text{F}_3\text{NaO}_3\text{S}^+$  286.9960; found: 286.9969.

### 2,5-dimethyl-3-((trifluoromethyl)sulfonyl)benzofuran (3w)

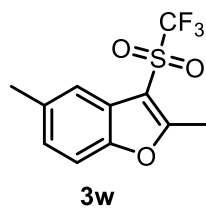

Compound **3w** (84% yield, yellow solid, Melting point: 78.4 – 80.6 °C):  $^1\text{H NMR}$  (400 MHz,  $\text{CDCl}_3$ )  $\delta$  7.62 (s, 1H), 7.40 (d,  $J = 8.4$  Hz, 1H), 7.21 (d,  $J = 8.4$  Hz, 1H), 2.80 (s, 3H), 2.47 (s, 3H).  $^{13}\text{C NMR}$  (100 MHz,  $\text{CDCl}_3$ )  $\delta$  167.6, 151.9, 135.3, 127.4, 124.0, 120.1 (q,  $J = 322$  Hz), 120.0, 111.0., 108.1, 21.4, 13.9.  $^{19}\text{F NMR}$  (376 MHz,  $\text{CDCl}_3$ )  $\delta$  -80.06 (s). **IR**:  $\bar{\nu} = 2923, 1554, 1359, 1189, 1117, 1071, 818$   $\text{cm}^{-1}$ ; **HRMS** (ESI)  $m/z$ :  $[\text{M} + \text{H}]^+$  calcd for  $\text{C}_{11}\text{H}_{10}\text{F}_3\text{O}_3\text{S}^+$  279.0297; found: 279.0230.

### 2-benzyl-1-((trifluoromethyl)sulfonyl)naphtho[2,1-*b*]furan (3x)

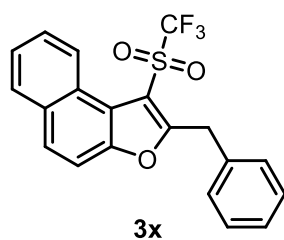

Compound **3x** (67% yield, yellow solid, Melting point: 153.8 – 155.7 °C):  $^1\text{H NMR}$  (400 MHz,  $\text{CDCl}_3$ )  $\delta$  9.00 (d,  $J = 8.4$  Hz, 1H), 7.94 (d,  $J = 8.4$  Hz, 1H), 7.85 (d,  $J = 8.8$  Hz, 1H), 7.66 (t,  $J = 8.0$  Hz, 1H), 7.61 (d,  $J = 8.8$  Hz, 1H), 7.55 (t,  $J = 7.6$  Hz, 1H), 7.41 (d,  $J = 7.6$  Hz, 2H), 7.34 (t,  $J = 7.6$  Hz, 2H), 7.28 (d,  $J = 7.2$  Hz, 1H), 4.66 (s, 2H).  $^{13}\text{C NMR}$  (100 MHz,  $\text{CDCl}_3$ )  $\delta$  168.5, 152.1, 135.1, 131.7, 129.2, 129.1, 129.0, 128.8, 127.6, 127.4, 126.4, 125.8, 125.4, 120.2 (q,  $J = 323$  Hz), 117.8, 111.6., 110.6, 34.2.  $^{19}\text{F NMR}$  (376 MHz,  $\text{CDCl}_3$ )  $\delta$  -78.64 (s). **IR**:  $\bar{\nu} = 3021, 1151, 1372, 1192, 746$   $\text{cm}^{-1}$ ; **HRMS** (ESI)  $m/z$ :  $[\text{M} + \text{Na}]^+$  calcd for  $\text{C}_{20}\text{H}_{13}\text{F}_3\text{NaO}_3\text{S}^+$  413.0430; found: 413.0433.

### 2-benzyl-3-((perfluorobutyl)sulfonyl)benzofuran (3y)

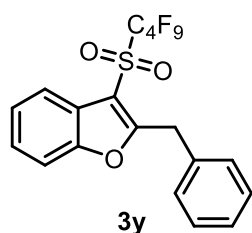

Compound **3y** (54% yield, white solid, Melting point: 105.8 – 107.1 °C):  $^1\text{H NMR}$  (400 MHz,  $\text{CDCl}_3$ )  $\delta$  7.89 – 7.87 (m, 1H), 7.52 – 7.50 (m, 1H), 7.41 – 7.39 (m, 4H), 7.36 – 7.33 (m, 2H), 7.30 – 7.27 (m, 1H), 4.52 (s, 2H).  $^{13}\text{C NMR}$  (100 MHz,  $\text{CDCl}_3$ )  $\delta$  168.7, 153.6, 134.4, 129.2, 128.9, 127.5, 126.5, 125.4, 123.9, 120.9, 111.8, 109.7, 33.6,  $^{13}\text{C NMR}$  for  $\text{CF}_2\text{CF}_2\text{CF}_2\text{CF}_3$  could not be assigned.  $^{19}\text{F NMR}$  (376 MHz,  $\text{CDCl}_3$ )  $\delta$  -80.68 (t,  $J = 9.4$  Hz, 3F), -113.05 – -113.13 (m, 2F), -120.95 – -121.04 (m, 2F), -125.86 – -125.95 (m, 2F). **IR**:  $\bar{\nu}$

= 3000, 1601 1453, 1244, 1027, 834, 714  $\text{cm}^{-1}$ ; **HRMS** (ESI)  $m/z$ :  $[\text{M} + \text{Na}]^+$  calcd for  $\text{C}_{19}\text{H}_{11}\text{F}_9\text{NaO}_3\text{S}^+$  153.0177; found: 153.0181.

### 2-benzyl-3-((perfluorohexyl)sulfonyl)benzofuran (3z)

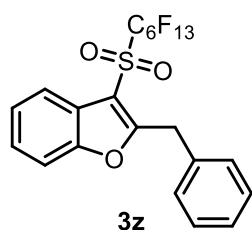

Compound **3z** (46% yield, yellow oil):  **$^1\text{H}$  NMR** (400 MHz,  $\text{CDCl}_3$ )  $\delta$  7.90 – 7.87 (m, 1H), 7.53 – 7.51 (m, 1H), 7.41 (d,  $J = 6.0$  Hz, 4H), 7.35 (t,  $J = 7.6$  Hz, 2H), 7.30 (d,  $J = 6.8$  Hz, 1H), 4.52 (s, 2H).  **$^{13}\text{C}$  NMR** (100 MHz,  $\text{CDCl}_3$ )  $\delta$  168.7, 153.6, 134.4, 129.2, 128.9, 127.5, 126.5, 125.4, 123.8, 120.8, 111.8, 109.6, 33.5.  **$^{19}\text{F}$  NMR** (376 MHz,  $\text{CDCl}_3$ )  $\delta$  -80.72 – -80.80 (m, 3F), -112.87 (s, 2H), -119.97 (s, 2H), -121.68 (s, 2H), -122.67 (s, 2H), -126.09 – -126.14 (m, 2F). **IR**:  $\bar{\nu} = 2924, 1454, 1358, 1195, 1141, 871$   $\text{cm}^{-1}$ ; **HRMS** (ESI)  $m/z$ :

$[\text{M} + \text{Na}]^+$  calcd for  $\text{C}_{21}\text{H}_{11}\text{F}_{13}\text{NaO}_3\text{S}^+$  613.0114; found: 613.0104.

### 2-benzyl-3-(tert-butylsulfonyl)benzofuran (3aa)

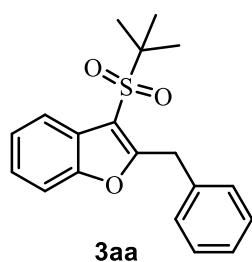

Compound **3aa** (42% yield, white solid, Melting point: 95.2 – 96.5  $^{\circ}\text{C}$ ):  **$^1\text{H}$  NMR** (400 MHz,  $\text{CDCl}_3$ )  $\delta$  7.89 – 7.86 (m, 1H), 7.45 – 7.43 (m, 3H), 7.33 – 7.30 (m, 4H), 7.26 – 7.25 (m, 1H), 4.48 (s, 2H), 1.43 (s, 9H).  **$^{13}\text{C}$  NMR** (100 MHz,  $\text{CDCl}_3$ )  $\delta$  163.7, 153.5, 135.6, 129.2, 128.6, 127.1, 125.8, 125.4, 124.3, 121.7, 112.6, 111.4, 61.2, 33.5, 23.4. **IR**:  $\bar{\nu} = 2958, 1342, 1150, 1043, 754, 642$   $\text{cm}^{-1}$ ; **HRMS** (ESI)  $m/z$ :  $[\text{M} + \text{Na}]^+$  calcd for  $\text{C}_{19}\text{H}_{20}\text{NaO}_3\text{S}^+$  351.1025; found: 351.1029.

### 2-benzyl-3-(phenylsulfonyl)benzofuran (3ab)

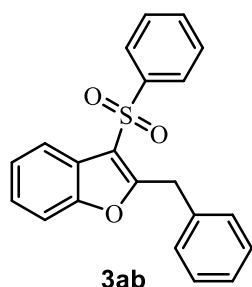

Compound **3ab** (68% yield, white solid, Melting point: 157.8 – 159.2  $^{\circ}\text{C}$ ):  **$^1\text{H}$  NMR** (400 MHz,  $\text{CDCl}_3$ )  $\delta$  7.91 – 7.88 (m, 3H), 7.55 – 7.51 (m, 1H), 7.45 – 7.41 (m, 3H), 7.34 – 7.27 (m, 7H), 4.59 (s, 2H).  **$^{13}\text{C}$  NMR** (100 MHz,  $\text{CDCl}_3$ )  $\delta$  161.7, 153.4, 142.1, 135.6, 133.3, 129.2, 129.0, 128.7, 127.1, 126.7, 125.5, 124.4, 124.1, 120.5, 117.9, 111.5, 33.2. **IR**:  $\bar{\nu} = 3198, 2159, 1505, 1359, 1148, 1057, 756$   $\text{cm}^{-1}$ ; **HRMS** (ESI)  $m/z$ :  $[\text{M} + \text{Na}]^+$  calcd for  $\text{C}_{21}\text{H}_{16}\text{NaO}_3\text{S}^+$  371.0712; found: 371.0715.

### 2-benzyl-3-((trifluoromethyl)sulfonyl)benzo[*b*]thiophene (7)

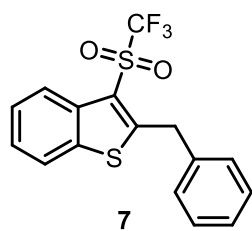

Compound **7** (66% yield, yellow solid, Melting point: 89.6 – 93.1  $^{\circ}\text{C}$ ):  **$^1\text{H}$  NMR** (400 MHz,  $\text{CDCl}_3$ )  $\delta$  8.32 (d,  $J = 8.0$  Hz, 1H), 7.71 (d,  $J = 8.0$  Hz, 1H), 7.49 (t,  $J = 8.0$  Hz, 1H), 7.41 (t,  $J = 7.6$  Hz, 1H), 7.37 – 7.32 (m, 5H), 4.71 (s, 2H).  **$^{13}\text{C}$  NMR** (100 MHz,  $\text{CDCl}_3$ )  $\delta$  166.1, 137.4, 137.1, 136.2, 129.4, 128.9, 127.7, 126.5, 125.9, 123.6, 122.0, 120.3 (q,  $J = 323$  Hz), 108.5, 36.0.  **$^{19}\text{F}$  NMR** (376 MHz,  $\text{CDCl}_3$ )  $\delta$  -79.11 (s). **IR**:  $\bar{\nu} = 2923, 1554, 1359, 1189, 1117, 1071, 818$   $\text{cm}^{-1}$ ; **HRMS** (ESI)  $m/z$ :  $[\text{M} + \text{Na}]^+$  calcd for  $\text{C}_{16}\text{H}_{11}\text{F}_3\text{NaO}_2\text{S}_2^+$  379.0045;

found: 379.0053.

### 2-benzyl-1-tosyl-3-((trifluoromethyl)sulfonyl)-1H-indole (5a)

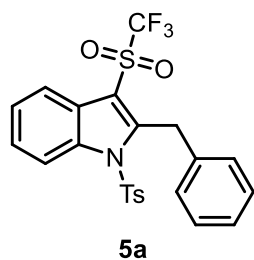

Compound **5a** (88% yield, white solid, Melting point: 191.9 – 192.5 °C): **<sup>1</sup>H NMR** (400 MHz, CDCl<sub>3</sub>) δ 8.20 (d, *J* = 8.4 Hz, 1H), 8.07 (d, *J* = 7.6 Hz, 1H), 7.47 – 7.40 (m, 2H), 7.23 – 7.21 (m, 3H), 7.19 (d, *J* = 8.4 Hz, 2H), 7.14 – 7.11 (m, 2H), 7.01 (d, *J* = 8.0 Hz, 2H), 5.01 (s, 2H), 2.30 (s, 3H). **<sup>13</sup>C NMR** (100 MHz, CDCl<sub>3</sub>) δ 149.9, 146.2, 136.3, 135.5, 134.2, 129.0, 128.8, 128.5, 127.1, 126.7, 126.4, 125.4, 125.3, 120.7, 120.1(q, *J* = 324 Hz), 114.9, 110.6, 31.2, 21.6. **<sup>19</sup>F NMR** (376 MHz, CDCl<sub>3</sub>) δ -79.38 (s). **IR**:  $\bar{\nu}$  = 3138, 1369, 1256, 1178, 1044, 788 cm<sup>-1</sup>; **HRMS** (ESI) *m/z*: [M + Na]<sup>+</sup> calcd for C<sub>23</sub>H<sub>18</sub>F<sub>3</sub>NNaO<sub>4</sub>S<sub>2</sub><sup>+</sup> 516.0522; found: 516.0525.

### 2-benzyl-5-methyl-1-tosyl-3-((trifluoromethyl)sulfonyl)-1H-indole (5b)

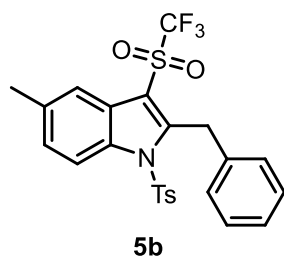

Compound **5b** (88% yield, yellow solid, Melting point: 169.2 – 169.7 °C): **<sup>1</sup>H NMR** (400 MHz, CDCl<sub>3</sub>) δ 8.07 (d, *J* = 8.8 Hz, 1H), 7.85 (s, 1H), 7.26 (d, *J* = 8.8 Hz, 1H), 7.21 – 7.20 (m, 4H), 7.18 (s, 1H), 7.12 – 7.10 (m, 2H), 7.00 (d, *J* = 8.0 Hz, 2H), 4.99 (s, 2H), 2.46 (s, 3H), 2.29 (s, 3H). **<sup>13</sup>C NMR** (100 MHz, CDCl<sub>3</sub>) δ 149.7, 146.0, 136.4, 135.5, 134.3, 133.7, 129.9, 128.7, 128.5, 127.9, 127.0, 126.6, 125.5, 120.3, 120.1(q, *J* = 323 Hz), 114.5, 110.2, 31.2, 21.5, 21.4. **<sup>19</sup>F NMR** (376 MHz, CDCl<sub>3</sub>) δ -79.37 (s). **IR**:  $\bar{\nu}$  = 3031, 1362, 1215, 1196, 1088, 725, cm<sup>-1</sup>; **HRMS** (ESI) *m/z*: [M + Na]<sup>+</sup> calcd for C<sub>24</sub>H<sub>20</sub>F<sub>3</sub>NNaO<sub>4</sub>S<sub>2</sub><sup>+</sup> 530.0678; found: 530.0688.

### 2-benzyl-5-methoxy-1-tosyl-3-((trifluoromethyl)sulfonyl)-1H-indole (5c)

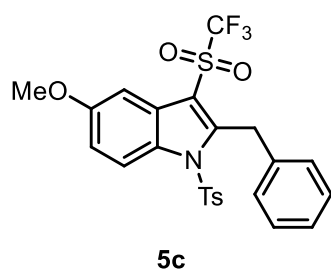

Compound **5c** (85% yield, yellow solid, Melting point: 154.2 – 154.9 °C): **<sup>1</sup>H NMR** (400 MHz, CDCl<sub>3</sub>) δ 8.09 (d, *J* = 9.6 Hz, 1H), 7.49 (d, *J* = 2.8 Hz, 1H), 7.22 – 7.19 (m, 4H), 7.17 (s, 1H), 7.13 – 7.11 (m, 2H), 7.05 (dd, *J* = 9.2, 2.8 Hz, 1H), 7.00 (d, *J* = 8.0 Hz, 2H), 4.98 (s, 2H), 3.85 (s, 3H), 2.28 (s, 3H). **<sup>13</sup>C NMR** (100 MHz, CDCl<sub>3</sub>) δ 157.7, 149.9, 146.1, 136.4, 134.2, 130.1, 129.9, 128.7, 128.5, 126.9, 126.6, 126.5, 120.1(q, *J* = 324 Hz), 116.1, 115.8, 110.0, 102.2, 55.7, 31.2, 21.5. **<sup>19</sup>F NMR** (376 MHz, CDCl<sub>3</sub>) δ -79.42 (s). **IR**:  $\bar{\nu}$  = 3031, 1468, 1355, 1196, 1083, 814 cm<sup>-1</sup>; **HRMS** (ESI) *m/z*: [M + Na]<sup>+</sup> calcd for C<sub>24</sub>H<sub>20</sub>F<sub>3</sub>NNaO<sub>5</sub>S<sub>2</sub><sup>+</sup> 546.0627; found: 546.0638.

### 2-benzyl-5-chloro-1-tosyl-3-((trifluoromethyl)sulfonyl)-1H-indole (5d)

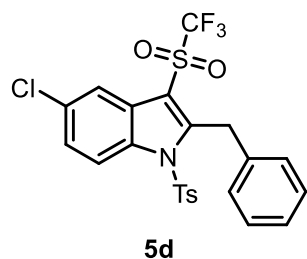

Compound **5d** (83% yield, yellow solid, Melting point: 192.5 – 195.0 °C): **<sup>1</sup>H NMR** (400 MHz, CDCl<sub>3</sub>) δ 8.13 (d, *J* = 8.8 Hz, 1H), 8.05 (s, 1H), 7.41 (d, *J* = 9.2 Hz, 1H), 7.23 – 7.22(m, 3H), 7.16 (d, *J* = 8.4 Hz, 2H), 7.11 – 7.09 (m, 2H), 7.02 (d, *J* = 8.0 Hz, 2H), 4.98 (s, 2H), 2.31 (s, 3H). **<sup>13</sup>C NMR** (100 MHz, CDCl<sub>3</sub>) δ 151.0, 146.5, 136.0, 133.9, 133.8, 131.7, 130.0, 128.7, 128.6, 127.0, 126.9, 126.8, 126.5, 120.2, 120.0 (q, *J* = 323 Hz), 115.1, 110.7, 31.3, 21.6. **IR**:  $\bar{\nu}$  = 3035, 1357, 1215, 1193, 1092, 750, 667 cm<sup>-1</sup>, **<sup>19</sup>F NMR** (376 MHz, CDCl<sub>3</sub>) δ -79.30 (s). **HRMS** (ESI) *m/z*: [M + Na]<sup>+</sup> calcd for C<sub>23</sub>H<sub>17</sub>ClF<sub>3</sub>NNaO<sub>4</sub>S<sub>2</sub><sup>+</sup> 550.0132 (100%), 552.0103 (32%); found: 550.0140, 552.0114.



### 2-benzyl-5-bromo-1-tosyl-3-((trifluoromethyl)sulfonyl)-1H-indole (5e)

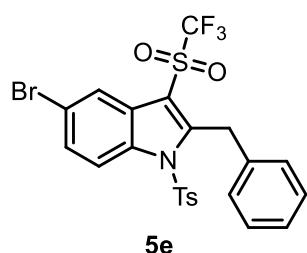

Compound **5e** (90% yield, yellow solid, Melting point: 202.6 – 205.6 °C):  $^1\text{H NMR}$  (400 MHz,  $\text{CDCl}_3$ )  $\delta$  8.21 (s, 1H), 8.08 (d,  $J = 8.8$  Hz, 1H), 7.55 (d,  $J = 9.2$  Hz, 1H), 7.23 – 7.22 (m, 3H), 7.16 (d,  $J = 6.4$  Hz, 2H), 7.11 – 7.09 (m, 2H), 7.02 (d,  $J = 8.0$  Hz, 2H), 4.98 (s, 2H), 2.31 (s, 3H).  $^{13}\text{C NMR}$  (100 MHz,  $\text{CDCl}_3$ )  $\delta$  150.9, 146.5, 136.0, 134.3, 133.9, 130.0, 129.6, 128.7, 128.6, 127.0, 126.9, 126.8, 123.2, 120.0 (q,  $J = 323$  Hz), 119.4, 116.3, 109.9, 31.2, 21.6.  $^{19}\text{F NMR}$  (376 MHz,  $\text{CDCl}_3$ )  $\delta$  -79.28 (s).

**IR:**  $\bar{\nu} = 3126, 1355, 1215, 1192, 1089, 738, 572\text{cm}^{-1}$ ; **HRMS** (ESI)  $m/z$ :  $[\text{M} + \text{Na}]^+$  calcd for  $\text{C}_{23}\text{H}_{17}\text{BrF}_3\text{NNaO}_4\text{S}_2^+$  593.9627 (100%), 595.9607 (97%); found: 593.9637, 595.9623.

### 2-benzyl-6-methyl-1-tosyl-3-((trifluoromethyl)sulfonyl)-1H-indole (5f)

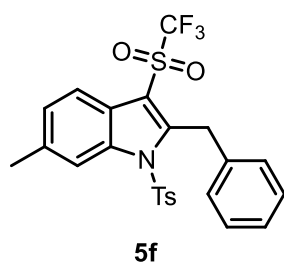

Compound **5f** (91% yield, yellow solid, Melting point: 179.6 – 181.1 °C):  $^1\text{H NMR}$  (400 MHz,  $\text{CDCl}_3$ )  $\delta$  8.01 (s, 1H), 7.93 (d,  $J = 8.4$  Hz, 1H), 7.24 (d,  $J = 5.6$  Hz, 1H), 7.21 – 7.19 (m, 5H), 7.11 – 7.09 (m, 2H), 7.01 (d,  $J = 8.0$  Hz, 2H), 4.98 (s, 2H), 2.50 (s, 3H), 2.29 (s, 3H).  $^{13}\text{C NMR}$  (100 MHz,  $\text{CDCl}_3$ )  $\delta$  149.1, 146.0, 136.9, 136.5, 136.0, 134.4, 129.9, 128.7, 128.5, 127.0, 126.9, 126.6, 123.0, 120.2, 120.1 (q,  $J = 324$  Hz), 114.8, 110.6, 31.2, 22.0, 21.5.  $^{19}\text{F NMR}$  (376 MHz,  $\text{CDCl}_3$ )  $\delta$  -79.40 (s). **IR:**  $\bar{\nu} = 3035, 1358,$

1216, 1192, 1082, 812  $\text{cm}^{-1}$ ; **HRMS** (ESI)  $m/z$ :  $[\text{M} + \text{Na}]^+$  calcd for  $\text{C}_{24}\text{H}_{20}\text{F}_3\text{NNaO}_4\text{S}_2^+$  530.0678; found: 530.0688.

### 2-benzyl-4-chloro-1-tosyl-3-((trifluoromethyl)sulfonyl)-1H-indole (5g)

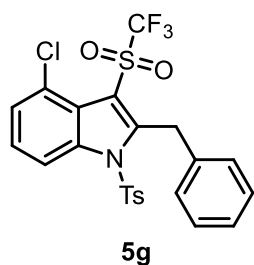

Compound **5g** (63% yield, yellow solid, Melting point: 196.2 – 198.0 °C):  $^1\text{H NMR}$  (400 MHz,  $\text{CDCl}_3$ )  $\delta$  8.13 (d,  $J = 9.2$  Hz, 1H), 8.05 (d,  $J = 2.0$  Hz, 1H), 7.41 (dd,  $J = 9.2, 2.0$  Hz, 1H), 7.23 – 7.21 (m, 3H), 7.17 (d,  $J = 8.0$  Hz, 2H), 7.11 – 7.09 (m, 2H), 7.02 (d,  $J = 8.0$  Hz, 2H), 4.98 (s, 2H), 2.31 (s, 3H).  $^{13}\text{C NMR}$  (100 MHz,  $\text{CDCl}_3$ )  $\delta$  151.0, 146.5, 136.0, 134.0, 133.9, 131.8, 130.0, 128.7, 128.6, 127.0, 126.9, 126.8, 126.5, 120.3, 120.0 (q,  $J = 324$  Hz), 116.0, 110.1, 31.3, 21.6.  $^{19}\text{F NMR}$  (376 MHz,  $\text{CDCl}_3$ )  $\delta$  -79.30 (s). **IR:**  $\bar{\nu} = 3035,$

1354, 1215, 1192, 1091, 773, 750  $\text{cm}^{-1}$ ; **HRMS** (ESI)  $m/z$ :  $[\text{M} + \text{Na}]^+$  calcd for  $\text{C}_{23}\text{H}_{17}\text{ClF}_3\text{NNaO}_4\text{S}_2^+$  550.0132 (100%), 552.0103 (32%); found: 550.0139, 552.0114.

### 2-(4-methylbenzyl)-1-tosyl-3-((trifluoromethyl)sulfonyl)-1H-indole (5h)

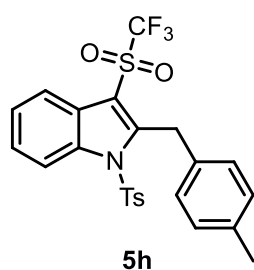

Compound **5h** (86% yield, yellow solid, Melting point: 207.7 – 209.6 °C):  $^1\text{H NMR}$  (400 MHz,  $\text{CDCl}_3$ )  $\delta$  8.21 (d,  $J = 8.8$  Hz, 1H), 8.07 (d,  $J = 8.0$  Hz, 1H), 7.47 – 7.39 (m, 2H), 7.21 (d,  $J = 8.4$  Hz, 2H), 7.01 – 6.97 (m, 6H), 4.96 (s, 2H), 2.32 (s, 3H), 2.31 (s, 3H).  $^{13}\text{C NMR}$  (125 MHz,  $\text{CDCl}_3$ )  $\delta$  150.3, 146.0, 136.3, 135.6, 134.4, 133.3, 129.8, 129.1, 128.6, 127.0, 126.4, 125.4, 125.3, 120.7, 120.1 (q,  $J = 324$  Hz), 114.9, 110.5, 30.8, 21.6, 21.0.  $^{19}\text{F NMR}$  (376 MHz,  $\text{CDCl}_3$ )  $\delta$  -79.4.  $^{19}\text{F NMR}$  (376 MHz,  $\text{CDCl}_3$ )  $\delta$  -79.40 (s). **IR:**  $\bar{\nu} = 3031,$

1360, 1211, 1170, 1089, 709  $\text{cm}^{-1}$ ; **HRMS** (ESI)  $m/z$ :  $[\text{M} + \text{Na}]^+$  calcd for  $\text{C}_{24}\text{H}_{20}\text{F}_3\text{NNaO}_4\text{S}_2^+$  530.0678; found: 530.0686.

### 2-(4-methoxybenzyl)-1-tosyl-3-((trifluoromethyl)sulfonyl)-1*H*-indole (**5i**)

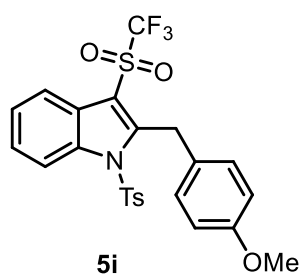

Compound **5i** (87% yield, white solid, Melting point: 178.2 – 179.8 °C): <sup>1</sup>H NMR (400 MHz, CDCl<sub>3</sub>) δ 8.20 (d, *J* = 8.8 Hz, 1H), 8.07 (d, *J* = 8.0 Hz, 1H), 7.47 – 7.39 (m, 2H), 7.22 (d, *J* = 8.0 Hz, 2H), 7.03 (t, *J* = 8.0 Hz, 4H), 6.74 (d, *J* = 8.4 Hz, 2H), 4.93 (s, 2H), 3.78 (s, 3H), 2.31 (s, 3H). <sup>13</sup>C NMR (100 MHz, CDCl<sub>3</sub>) δ 158.5, 150.4, 146.0, 135.6, 134.4, 134.2, 129.8, 128.3, 127.0, 126.4, 125.4, 125.3, 120.7, 120.1 (q, *J* = 324 Hz), 114.9, 113.9, 110.4, 55.3, 30.3, 21.6. <sup>19</sup>F NMR (376 MHz, CDCl<sub>3</sub>) δ -79.40 (s). IR:  $\bar{\nu}$  = 3039, 1360, 1212, 1173, 1086, 1029, 708 cm<sup>-1</sup>; HRMS (ESI) *m/z*: [M + Na]<sup>+</sup> calcd for C<sub>24</sub>H<sub>20</sub>F<sub>3</sub>NNaO<sub>5</sub>S<sub>2</sub><sup>+</sup> 546.0627; found: 546.0636.

### 2-(4-chlorobenzyl)-1-tosyl-3-((trifluoromethyl)sulfonyl)-1*H*-indole (**5j**)

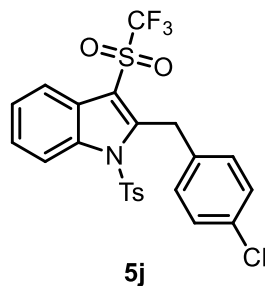

Compound **5j** (79% yield, yellow solid, Melting point: 182.4 – 184.1 °C): <sup>1</sup>H NMR (400 MHz, CDCl<sub>3</sub>) δ 8.26 (d, *J* = 8.4 Hz, 1H), 8.08 (d, *J* = 7.6 Hz, 1H), 7.50 – 7.42 (m, 2H), 7.24 (d, *J* = 8.0 Hz, 2H), 7.13 (d, *J* = 8.4 Hz, 2H), 7.05 (d, *J* = 8.0 Hz, 2H), 6.99 (d, *J* = 8.0 Hz, 2H), 4.96 (s, 2H), 2.34 (s, 3H). <sup>13</sup>C NMR (100 MHz, CDCl<sub>3</sub>) δ 149.0, 146.4, 135.8, 134.7, 134.5, 134.3, 132.7, 129.9, 128.5, 126.7, 126.6, 125.6, 125.1, 120.7, 120.0 (q, *J* = 323 Hz), 114.9, 110.9, 30.6, 21.6. <sup>19</sup>F NMR (376 MHz, CDCl<sub>3</sub>) δ -79.36 (s). IR:  $\bar{\nu}$  = 3035, 1358, 1203, 1190, 1090, 753, 709 cm<sup>-1</sup>; HRMS (ESI) *m/z*: [M + Na]<sup>+</sup> calcd for C<sub>23</sub>H<sub>17</sub>ClF<sub>3</sub>NNaO<sub>4</sub>S<sub>2</sub><sup>+</sup> 550.0132 (100%), 552.0103 (32%); found: 550.0145, 552.0121.

### 2-(4-bromobenzyl)-1-tosyl-3-((trifluoromethyl)sulfonyl)-1*H*-indole (**5k**)

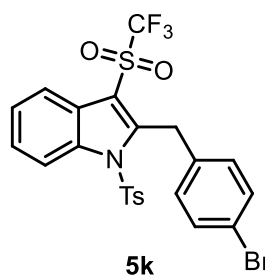

Compound **5k** (71% yield, yellow solid, Melting point: 197.9 – 200.1 °C): <sup>1</sup>H NMR (400 MHz, CDCl<sub>3</sub>) δ 8.27 (d, *J* = 8.4 Hz, 1H), 8.08 (d, *J* = 8.4 Hz, 1H), 7.51 – 7.42 (m, 2H), 7.26 – 7.22 (m, 4H), 7.05 (d, *J* = 8.0 Hz, 2H), 6.92 (d, *J* = 8.0 Hz, 2H), 4.94 (s, 2H), 2.34 (s, 3H). <sup>13</sup>C NMR (100 MHz, CDCl<sub>3</sub>) δ 148.9, 146.4, 135.9, 135.2, 134.3, 131.5, 130.3, 129.9, 126.7, 126.6, 125.6, 125.1, 120.7, 120.6, 120.0 (q, *J* = 324 Hz), 114.9, 110.9, 30.6, 21.6. <sup>19</sup>F NMR (376 MHz, CDCl<sub>3</sub>) δ -79.35 (s). IR:  $\bar{\nu}$  = 3069, 1359, 1211, 1170, 1083, 708, 564 cm<sup>-1</sup>; HRMS (ESI) *m/z*: [M + Na]<sup>+</sup> calcd for C<sub>23</sub>H<sub>17</sub>BrF<sub>3</sub>NNaO<sub>4</sub>S<sub>2</sub><sup>+</sup> 593.9627 (100%), 595.9607 (97%); found: 593.9636, 595.9626.

### 2-(4-pentylbenzyl)-1-tosyl-3-((trifluoromethyl)sulfonyl)-1*H*-indole (**5l**)

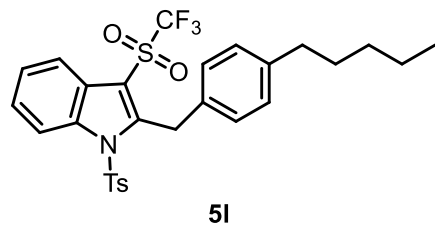

Compound **5l** (80% yield, white solid, Melting point: 178.4 – 179.9 °C): <sup>1</sup>H NMR (400 MHz, CDCl<sub>3</sub>) δ 8.17 (d, *J* = 7.6 Hz, 1H), 8.07 (d, *J* = 8.0 Hz, 1H), 7.46 – 7.39 (m, 2H), 7.19 (d, *J* = 8.4 Hz, 2H), 7.04 (s, 4H), 6.99 (d, *J* = 8.4 Hz, 2H), 4.96 (s, 2H), 2.57 (t, *J* = 7.6 Hz, 2H), 2.30 (s, 3H), 1.64 – 1.57 (m, 2H), 1.36 – 1.32 (m, 4H), 0.90 (t, *J* = 6.8 Hz, 3H). <sup>13</sup>C NMR (100 MHz, CDCl<sub>3</sub>) δ 150.3, 146.0, 141.5, 135.5, 134.3, 133.4, 129.8, 128.7, 128.5, 127.1, 126.4, 125.4, 125.3, 120.7, 120.1 (q, *J* = 324 Hz), 114.8, 110.4, 35.5, 31.6, 31.4, 30.8, 22.6, 21.6, 14.0. <sup>19</sup>F NMR (376 MHz, CDCl<sub>3</sub>) δ -79.40 (s). IR:  $\bar{\nu}$  = 3035, 1358, 1215, 1192, 1082, 810 cm<sup>-1</sup>; HRMS (ESI) *m/z*: [M + H]<sup>+</sup> calcd for C<sub>28</sub>H<sub>29</sub>F<sub>3</sub>NO<sub>4</sub>S<sub>2</sub><sup>+</sup> 564.1485; found: 564.1483.

### 2-(2-methylbenzyl)-1-tosyl-3-((trifluoromethyl)sulfonyl)-1H-indole (5m)

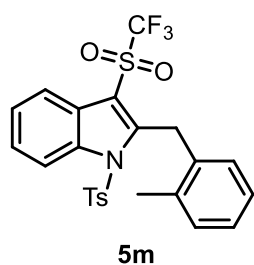

Compound **5m** (80% yield, yellow solid, Melting point: 178.2 – 180.5 °C):  $^1\text{H NMR}$  (400 MHz,  $\text{CDCl}_3$ )  $\delta$  8.29 (d,  $J = 8.4$  Hz, 1H), 8.08 (d,  $J = 7.6$  Hz, 1H), 7.51 – 7.42 (m, 2H), 7.25 (s, 2H), 7.21 (d,  $J = 7.6$  Hz, 1H), 7.08 (t,  $J = 7.2$  Hz, 1H), 7.01 (d,  $J = 8.0$  Hz, 2H), 6.75 (t,  $J = 7.6$  Hz, 1H), 6.30 (d,  $J = 7.6$  Hz, 1H), 4.92 (s, 2H), 2.49 (s, 3H), 2.31 (s, 3H).  $^{13}\text{C NMR}$  (100 MHz,  $\text{CDCl}_3$ )  $\delta$  150.2, 146.2, 136.0, 135.7, 135.3, 134.1, 130.2, 129.9, 127.1, 127.0, 126.4, 126.0, 125.4, 120.6, 120.1 (q,  $J = 323$  Hz), 114.9, 111.0, 28.5, 21.6, 19.8.  $^{19}\text{F NMR}$  (376 MHz,  $\text{CDCl}_3$ )  $\delta$  -79.27 (s). **IR**:  $\bar{\nu} = 3024, 1357, 1209, 1143, 1081, 746$   $\text{cm}^{-1}$ ; **HRMS** (ESI)  $m/z$ :  $[\text{M} + \text{Na}]^+$  calcd for  $\text{C}_{24}\text{H}_{20}\text{F}_3\text{NNaO}_4\text{S}_2^+$  530.0678; found: 530.0688.

### 2-(2-chlorobenzyl)-1-tosyl-3-((trifluoromethyl)sulfonyl)-1H-indole (5n)

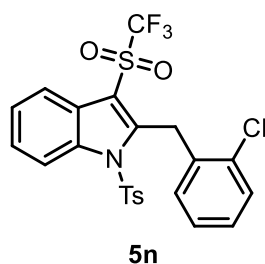

Compound **5n** (78% yield, yellow solid, Melting point: 180.2 – 184.0 °C):  $^1\text{H NMR}$  (400 MHz,  $\text{CDCl}_3$ )  $\delta$  8.36 (d,  $J = 8.4$  Hz, 1H), 8.08 (d,  $J = 8.0$  Hz, 1H), 7.53 – 7.47 (m, 3H), 7.45 (t,  $J = 7.6$  Hz, 1H), 7.39 (d,  $J = 8.0$  Hz, 1H), 7.13 – 7.08 (m, 3H), 6.87 (t,  $J = 7.6$  Hz, 1H), 6.40 (d,  $J = 7.6$  Hz, 1H), 5.03 (s, 2H), 2.31 (s, 3H).  $^{13}\text{C NMR}$  (100 MHz,  $\text{CDCl}_3$ )  $\delta$  148.2, 146.5, 135.9, 135.0, 134.2, 133.3, 130.1, 129.3, 128.3, 127.6, 126.9, 126.8, 126.7, 125.6, 125.1, 120.6, 120.0 (q,  $J = 323$  Hz), 115.0, 111.4, 29.3, 21.6.  $^{19}\text{F NMR}$  (376 MHz,  $\text{CDCl}_3$ )  $\delta$  -79.22 (s). **IR**:  $\bar{\nu} = 3020, 1358, 1203, 1188, 1082, 754, 709$   $\text{cm}^{-1}$ ; **HRMS** (ESI)  $m/z$ :  $[\text{M} + \text{Na}]^+$  calcd for  $\text{C}_{23}\text{H}_{17}\text{ClF}_3\text{NNaO}_4\text{S}_2^+$  550.0132 (100%), 552.0103 (32%); found: 550.0141, 552.0114.

### 2-(3-methylbenzyl)-1-tosyl-3-((trifluoromethyl)sulfonyl)-1H-indole (5o)

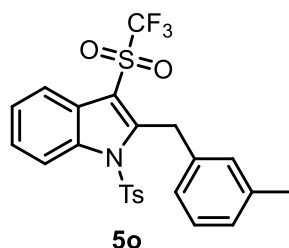

Compound **5o** (85% yield, yellow solid, Melting point: 181.3 – 184.2 °C):  $^1\text{H NMR}$  (400 MHz,  $\text{CDCl}_3$ )  $\delta$  8.24 (d,  $J = 8.0$  Hz, 1H), 8.08 (d,  $J = 8.0$  Hz, 1H), 7.48 – 7.40 (m, 2H), 7.19 (d,  $J = 7.2$  Hz, 2H), 7.11 (t,  $J = 7.6$  Hz, 1H), 7.00 (t,  $J = 8.4$  Hz, 3H), 6.93 (d,  $J = 7.6$  Hz, 1H), 6.80 (s, 1H), 4.98 (s, 2H), 2.29 (s, 3H), 2.18 (s, 3H).  $^{13}\text{C NMR}$  (100 MHz,  $\text{CDCl}_3$ )  $\delta$  150.0, 146.0, 138.1, 136.1, 135.6, 134.2, 129.8, 129.2, 128.4, 127.3, 127.0, 126.4, 125.9, 125.4, 125.3, 120.6, 120.1 (q,  $J = 324$  Hz), 114.9, 110.5, 31.1, 21.5, 21.3.  $^{19}\text{F NMR}$  (376 MHz,  $\text{CDCl}_3$ )  $\delta$  -79.36 (s). **IR**:  $\bar{\nu} = 3024, 1360, 1192, 1173, 1086, 708$   $\text{cm}^{-1}$ ; **HRMS** (ESI)  $m/z$ :  $[\text{M} + \text{Na}]^+$  calcd for  $\text{C}_{24}\text{H}_{20}\text{F}_3\text{NNaO}_4\text{S}_2^+$  530.0678; found: 530.0688.

### 2-(3-methoxybenzyl)-1-tosyl-3-((trifluoromethyl)sulfonyl)-1H-indole (5p)

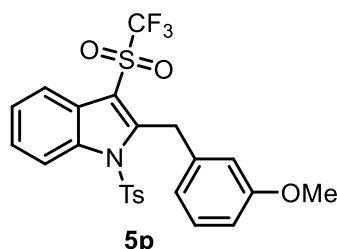

Compound **5p** (83% yield, white solid, Melting point: 195.0 – 196.8 °C):  $^1\text{H NMR}$  (400 MHz,  $\text{CDCl}_3$ )  $\delta$  8.23 (d,  $J = 8.8$  Hz, 1H), 8.07 (d,  $J = 8.0$  Hz, 1H), 7.48 – 7.40 (m, 2H), 7.25 (d,  $J = 6.8$  Hz, 2H), 7.13 (td,  $J = 8.0, 2.0$  Hz, 1H), 7.02 (d,  $J = 7.6$  Hz, 2H), 6.75 (d,  $J = 8.4$  Hz, 1H), 6.71 (d,  $J = 7.6$  Hz, 1H), 6.58 (s, 1H), 4.99 (s, 2H), 3.69 (s, 3H), 2.30 (s, 3H).  $^{13}\text{C NMR}$  (100 MHz,  $\text{CDCl}_3$ )  $\delta$  159.7, 149.6, 146.1, 137.8, 135.6, 134.3, 129.8, 129.4, 127.0, 126.5, 125.4, 125.3, 121.1, 120.7, 120.1 (q,  $J = 323$  Hz), 114.9, 114.5, 112.1, 110.7, 55.1, 31.1, 21.5.  $^{19}\text{F NMR}$  (376 MHz,  $\text{CDCl}_3$ )  $\delta$  -79.33 (s). **IR**:  $\bar{\nu} = 3016, 1354, 1209, 1188, 1083, 705$   $\text{cm}^{-1}$ ; **HRMS** (ESI)  $m/z$ :  $[\text{M} + \text{Na}]^+$  calcd for  $\text{C}_{24}\text{H}_{20}\text{F}_3\text{NNaO}_5\text{S}_2^+$  546.0627; found: 546.0637.

### 2-(naphthalen-2-ylmethyl)-1-tosyl-3-((trifluoromethyl)sulfonyl)-1H-indole (5q)

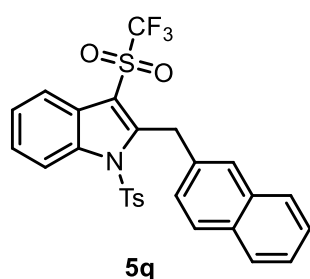

Compound **5q** (70% yield, yellow solid, Melting point: 170.9 – 173.5 °C): **<sup>1</sup>H NMR** (400 MHz, CDCl<sub>3</sub>) δ 8.33 (d, *J* = 8.0 Hz, 1H), 8.14 (d, *J* = 7.6 Hz, 1H), 7.77 (d, *J* = 8.0 Hz, 1H), 7.70 (d, *J* = 8.8 Hz, 1H), 7.49 (d, *J* = 8.0 Hz, 1H), 7.46 – 7.34 (m, 4H), 7.31 (d, *J* = 8.0 Hz, 1H), 7.13 (s, 1H), 7.06 (d, *J* = 8.0 Hz, 2H), 6.55 (d, *J* = 8.0 Hz, 2H), 5.16 (s, 2H), 1.97 (s, 3H). **<sup>13</sup>C NMR** (100 MHz, CDCl<sub>3</sub>) δ 149.6, 145.9, 136.0, 134.1, 133.6, 133.2, 132.2, 129.4, 128.1, 127.6, 127.4, 127.0, 126.9, 126.6, 126.4, 126.0, 125.7, 125.5, 125.2, 120.7, 120.1 (q, *J* = 323 Hz), 115.0, 110.8, 31.3, 21.2. **<sup>19</sup>F NMR** (376 MHz, CDCl<sub>3</sub>) δ -79.28 (s). **IR:**  $\bar{\nu}$  = 3054, 1362 1211, 1185, 1079, 814 cm<sup>-1</sup>; **HRMS** (ESI) *m/z*: [M + Na]<sup>+</sup> calcd for C<sub>27</sub>H<sub>20</sub>F<sub>3</sub>NNaO<sub>4</sub>S<sub>2</sub><sup>+</sup> 566.0678; found: 566.0688.

### 2-pentyl-1-tosyl-3-((trifluoromethyl)sulfonyl)-1H-indole (5r)

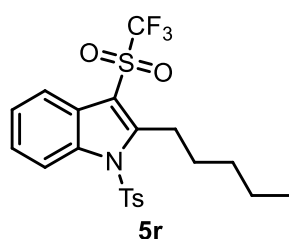

Compound **5r** (80% yield, yellow solid, Melting point: 98.1 – 102.5 °C): **<sup>1</sup>H NMR** (400 MHz, CDCl<sub>3</sub>) δ 8.23 (d, *J* = 8.4 Hz, 1H), 7.96 (d, *J* = 7.6 Hz, 1H), 7.71 (d, *J* = 8.4 Hz, 2H), 7.44 – 7.36 (m, 2H), 7.30 (d, *J* = 8.0 Hz, 2H), 3.44 – 3.40 (m, 2H), 2.40 (s, 3H), 1.82 – 1.74 (m, 2H), 1.52 – 1.45 (m, 2H), 1.42 – 1.35 (m, 2H), 0.93 (t, *J* = 7.2 Hz, 3H). **<sup>13</sup>C NMR** (100 MHz, CDCl<sub>3</sub>) δ 154.4, 146.5, 135.6, 135.1, 130.7, 130.4, 126.6, 126.1, 125.5, 120.4, 120.1 (q, *J* = 323 Hz), 114.9, 108.6, 32.1, 31.8, 26.7, 22.1, 21.7, 13.9.

**<sup>19</sup>F NMR** (376 MHz, CDCl<sub>3</sub>) δ -79.56. **IR:**  $\bar{\nu}$  = 2963, 1363, 1215, 1181, 1086, 754, 682 cm<sup>-1</sup>; **HRMS** (ESI) *m/z*: [M + Na]<sup>+</sup> calcd for C<sub>21</sub>H<sub>22</sub>F<sub>3</sub>NNaO<sub>4</sub>S<sub>2</sub><sup>+</sup> 496.0835; found: 496.0840.

### 2-methyl-1-tosyl-3-((trifluoromethyl)sulfonyl)-1H-indole (5s)

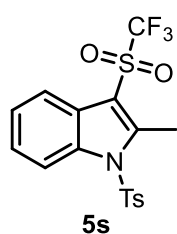

Compound **5s** (86% yield, white solid, Melting point: 135.0 – 137.7 °C): **<sup>1</sup>H NMR** (400 MHz, CDCl<sub>3</sub>) δ 8.30 (d, *J* = 8.4 Hz, 1H), 8.00 (d, *J* = 7.2 Hz, 1H), 7.77 (d, *J* = 8.4 Hz, 2H), 7.46 – 7.37 (m, 2H), 7.32 (d, *J* = 8.0 Hz, 2H), 2.99 (s, 3H), 2.41 (s, 3H). **<sup>13</sup>C NMR** (100 MHz, CDCl<sub>3</sub>) δ 148.9, 146.7, 135.5, 134.9, 130.5, 126.8, 126.2, 125.4, 125.3, 120.3, 120.1 (q, *J* = 322 Hz), 114.5, 109.0, 21.7, 13.2. **<sup>19</sup>F NMR** (376 MHz, CDCl<sub>3</sub>) δ -79.95 (s). **IR:**  $\bar{\nu}$  = 2926, 1359, 1203, 1177, 1083, 710 cm<sup>-1</sup>; **HRMS** (ESI) *m/z*: [M + Na]<sup>+</sup> calcd for C<sub>17</sub>H<sub>14</sub>F<sub>3</sub>NNaO<sub>4</sub>S<sub>2</sub><sup>+</sup> 440.0209; found: 440.0214.

### 5-chloro-2-methyl-1-tosyl-3-((trifluoromethyl)sulfonyl)-1H-indole (5t)

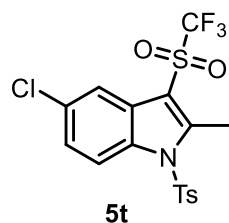

Compound **5t** (84% yield, white solid, Melting point: 188.5 – 189.9 °C): **<sup>1</sup>H NMR** (400 MHz, CDCl<sub>3</sub>) δ 8.24 (d, *J* = 9.2 Hz, 1H), 7.97 (d, *J* = 2.0 Hz, 1H), 7.76 (d, *J* = 8.4 Hz, 2H), 7.40 (dd, *J* = 9.2, 2.4 Hz, 1H), 7.35 (d, *J* = 8.0 Hz, 2H), 2.97 (s, 3H), 2.43 (s, 3H). **<sup>13</sup>C NMR** (100 MHz, CDCl<sub>3</sub>) δ 150.0, 147.1, 134.5, 133.9, 131.6, 130.6, 126.9, 126.7, 126.6, 120.0 (q, *J* = 323 Hz), 119.9, 115.7, 108.4, 21.7, 13.3. **<sup>19</sup>F NMR** (376 MHz, CDCl<sub>3</sub>) δ -79.87 (s). **IR:**  $\bar{\nu}$  = 3100, 1359, 1203, 1181, 1087, 772, 671 cm<sup>-1</sup>; **HRMS** (ESI) *m/z*: [M + Na]<sup>+</sup> calcd for C<sub>17</sub>H<sub>13</sub>ClF<sub>3</sub>NNaO<sub>4</sub>S<sub>2</sub><sup>+</sup> 473.9819; found: 473.9817.

### 2-benzyl-1-((4-nitrophenyl)sulfonyl)-3-((trifluoromethyl)sulfonyl)-1H-indole (5u)

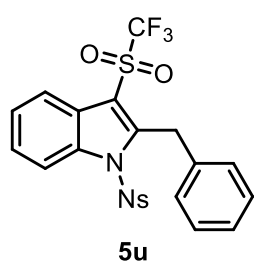

Compound **5u** (83% yield, white solid, Melting point: 193.3 – 195.7 °C): <sup>1</sup>H NMR (400 MHz, CDCl<sub>3</sub>) δ 8.22 (d, *J* = 7.6 Hz, 1H), 8.13 (d, *J* = 7.6 Hz, 1H), 7.95 (d, *J* = 8.8 Hz, 2H), 7.54 – 7.46 (m, 2H), 7.37 (d, *J* = 8.8 Hz, 2H), 7.21 (d, *J* = 7.6 Hz, 1H), 7.18 – 7.14 (m, 2H), 7.05 (d, *J* = 7.2 Hz, 2H), 5.00 (s, 2H). <sup>13</sup>C NMR (100 MHz, CDCl<sub>3</sub>) δ 150.6, 149.5, 142.4, 135.6, 128.9, 128.7, 128.4, 128.1, 127.2, 127.1, 126.1, 125.2, 124.2, 121.2, 120.0 (q, *J* = 323 Hz), 114.5, 112.3, 31.1. <sup>19</sup>F NMR (376 MHz, CDCl<sub>3</sub>) δ -79.22 (s). IR:  $\bar{\nu}$  = 3114, 1532, 1363, 1211, 1188, 1092, 738, 720 cm<sup>-1</sup>; HRMS (ESI) *m/z*: [M + Na]<sup>+</sup> calcd for C<sub>22</sub>H<sub>15</sub>F<sub>3</sub>N<sub>2</sub>NaO<sub>6</sub>S<sub>2</sub><sup>+</sup> 547.0216; found: 547.0215.

### tert-butyl 2-benzyl-3-((trifluoromethyl)sulfonyl)-1H-indole-1-carboxylate (5v)

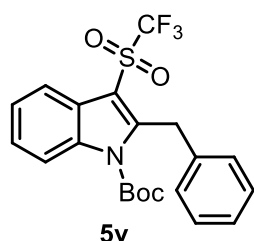

Compound **5v** (73% yield, white solid, Melting point: 138.6 – 140.2 °C): <sup>1</sup>H NMR (400 MHz, CDCl<sub>3</sub>) δ 8.10 – 8.08 (m, 1H), 8.00 – 7.98 (m, 1H), 7.45 – 7.38 (m, 2H), 7.24 (d, *J* = 7.2 Hz, 2H), 7.19 (d, *J* = 7.2 Hz, 1H), 7.03 (d, *J* = 7.6 Hz, 2H), 4.94 (s, 2H), 1.42 (s, 9H). <sup>13</sup>C NMR (100 MHz, CDCl<sub>3</sub>) δ 149.9, 148.2, 137.2, 135.5, 128.5, 127.9, 126.6, 126.0, 125.2, 124.9, 120.4, 120.0 (q, *J* = 323 Hz), 114.9, 108.9, 87.2, 31.6, 27.5. <sup>19</sup>F NMR (376 MHz, CDCl<sub>3</sub>) δ -79.71 (s). IR:  $\bar{\nu}$  = 3208, 2058, 1359, 1157, 1035, 709 cm<sup>-1</sup>; HRMS (ESI) *m/z*: [M + Na]<sup>+</sup> calcd for C<sub>21</sub>H<sub>20</sub>F<sub>3</sub>NNaO<sub>4</sub>S<sup>+</sup> 462.0957; found: 462.0948.

### 2-benzyl-3-((trifluoromethyl)thio)benzofuran (9)

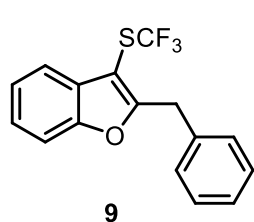

Compound **9** (62% yield, white solid, Melting point: 83.4 – 84.3 °C): <sup>1</sup>H NMR (400 MHz, CDCl<sub>3</sub>) δ 7.72 – 7.70 (m, 1H), 7.49 – 7.47 (m, 1H), 7.36 – 7.35 (m, 6H), 7.31 – 7.28 (m, 1H), 4.37 (s, 2H). <sup>13</sup>C NMR (100 MHz, CDCl<sub>3</sub>) δ 164.3, 154.3, 136.1, 129.2, 129.1 (q, *J* = 308 Hz), 128.8, 128.7, 127.0, 125.0, 123.9, 119.8, 111.5, 99.0, 32.7. <sup>19</sup>F NMR (376 MHz, CDCl<sub>3</sub>) δ -42.68 (s). IR:  $\bar{\nu}$  = 3049, 1483, 1438, 915, 752, 680, 523 cm<sup>-1</sup>; HRMS (ESI) *m/z*: [M + H]<sup>+</sup> calcd for C<sub>16</sub>H<sub>12</sub>F<sub>3</sub>OS<sup>+</sup> 309.0555; found: 309.0556.

### 2-benzyl-3-(4-methoxyphenyl)benzofuran (10)

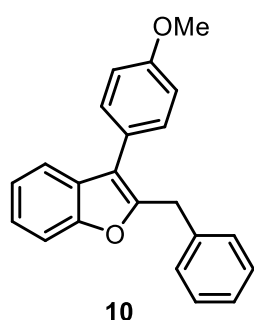

Compound **10** (82% yield, white solid, Melting point: 135.5 – 136.8 °C): <sup>1</sup>H NMR (400 MHz, CDCl<sub>3</sub>) δ 7.56 (d, *J* = 7.2 Hz, 1H), 7.44 – 7.42 (m, 3H), 7.31 – 7.20 (m, 7H), 7.01 (d, *J* = 8.0 Hz, 2H), 4.19 (s, 2H), 3.85 (s, 3H). <sup>13</sup>C NMR (100 MHz, CDCl<sub>3</sub>) δ 158.9, 154.3, 152.2, 138.0, 130.2, 128.9, 128.6, 128.5, 126.5, 124.7, 123.8, 122.6, 119.7, 117.8, 114.3, 111.1, 55.3, 32.8. IR:  $\bar{\nu}$  = 3034, 1549, 1367, 1159, 1024, 712, 543 cm<sup>-1</sup>; HRMS (ESI) *m/z*: [M + Na]<sup>+</sup> calcd for C<sub>22</sub>H<sub>18</sub>NaO<sub>2</sub><sup>+</sup> 337.1199; found: 337.1196.

### Crystallography of 2-alkyl-3-fluoroalkanesulfonyl benzofuran 3a

The single crystal of **3a** that was used for the structure determination via X-ray crystallography (see below), was recrystallized from dichloromethane and petroleum ether. The supplementary

crystallographic data for the structure of **3a** has been deposited at the Cambridge Crystallographic Data Centre as CCDC 2405045.

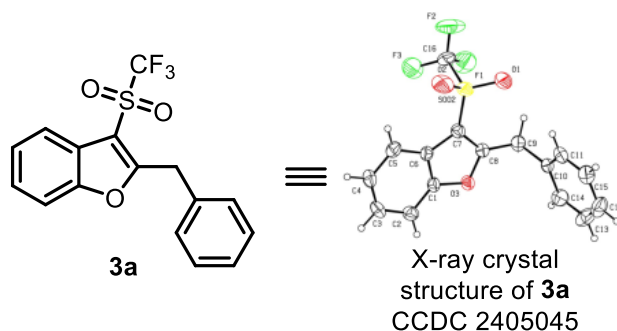

**Figure S1.** ORTEP drawings of **3a** (Ellipsoid contour probability level = 50%).

**Table S2.** Crystal data and structure refinement for **3a**

| CCDC                                        | 2405045                                                         |
|---------------------------------------------|-----------------------------------------------------------------|
| Empirical formula                           | C <sub>16</sub> H <sub>11</sub> F <sub>3</sub> O <sub>3</sub> S |
| Formula weight                              | 340.31                                                          |
| Temperature/K                               | 277                                                             |
| Crystal system                              | triclinic                                                       |
| Space group                                 | P 1                                                             |
| a/Å                                         | 9.4196(10)                                                      |
| b/Å                                         | 9.5749(10)                                                      |
| c/Å                                         | 9.8697(10)                                                      |
| α/°                                         | 108.212(10)                                                     |
| β/°                                         | 111.479(10)                                                     |
| γ/°                                         | 94.182(10)                                                      |
| Volume/Å <sup>3</sup>                       | 768.970(15)                                                     |
| Z                                           | 1                                                               |
| ρ <sub>calc</sub> /cm <sup>3</sup>          | 1.470                                                           |
| μ/mm <sup>-1</sup>                          | 2.294                                                           |
| F(000)                                      | 348.0                                                           |
| Crystal size/mm <sup>3</sup>                | 0.18 × 0.15 × 0.08                                              |
| Radiation                                   | Cu Kα (λ = 1.54184)                                             |
| 2θ range for data collection/°              | 9.952 to 169.334                                                |
| Index ranges                                | -11 ≤ h ≤ 12, -11 ≤ k ≤ 12, -12 ≤ l ≤ 12                        |
| Reflections collected                       | 19527                                                           |
| Independent reflections                     | 5549 [R <sub>int</sub> = 0.0397, R <sub>sigma</sub> = 0.0218]   |
| Data/restraints/parameters                  | 5549/16/415                                                     |
| Goodness-of-fit on F <sup>2</sup>           | 1.068                                                           |
| Final R indexes [I ≥ 2σ (I)]                | R <sub>1</sub> = 0.0411, wR <sub>2</sub> = 0.1164               |
| Final R indexes [all data]                  | R <sub>1</sub> = 0.0436, wR <sub>2</sub> = 0.1200               |
| Largest diff. peak/hole / e Å <sup>-3</sup> | 0.21/-0.34                                                      |

## References

- [1]. Li, Y.; Xue, J.; Li, X.; Chen, R. *Synlett* **2012**, 23, 1043-1046. (b) Ranjith Kumar, G.; Kiran Kumar, Y.; Kant, R.; Sridhar Reddy, M. *Org. Biomol. Chem.* **2016**, 14, 4077-4088. (c) Saha, S.; Schneider, C. *Org. Lett.* **2015**, 17, 648-651. (d) Yoshida, M.; Fujino, Y.; Doi, T. *Org. Lett.* **2011**, 13, 4526-4529. (e) Zhang, M.; Yang, J.; Xu, Q.; Dong, C.; Han, L.-B.; Shen, R. *Adv. Synth. Catal.* **2018**, 360, 334-345.
- [2]. Susanti, D.; Koh, F.; Kusuma, J. A.; Kothandaraman, P.; Chan, P. W. *J. Org. Chem.* **2012**, 77, 7166-7175. (b) Ueda, J. I.; Enomoto, Y.; Seki, M.; Konishi, T.; Ogasawara, M.; Yoshida, K. *J. Org. Chem.* **2020**, 85, 6420-6428. (c) Wang, A.; Hu, X.; Xie, X.; Liu, Y. *Adv. Synth. Catal.* **2021**, 363, 3769-3774.
- [3]. Álvarez, R.; Martínez, C.; Madich, Y.; Denis, J. G.; Aurrecochea, J. M.; de Lera, Á. R. *Chem. Eur. J.* **2010**, 16, 12746-12753.
- [4]. Chatelain, P.; Sau, A.; Rowley, C. N. *Angew. Chem., Int. Ed.* **2019**, 58, 14959-14963.

Copies of NMR spectra

<sup>1</sup>H NMR (400 MHz, CDCl<sub>3</sub>) spectroscopy of **3a**

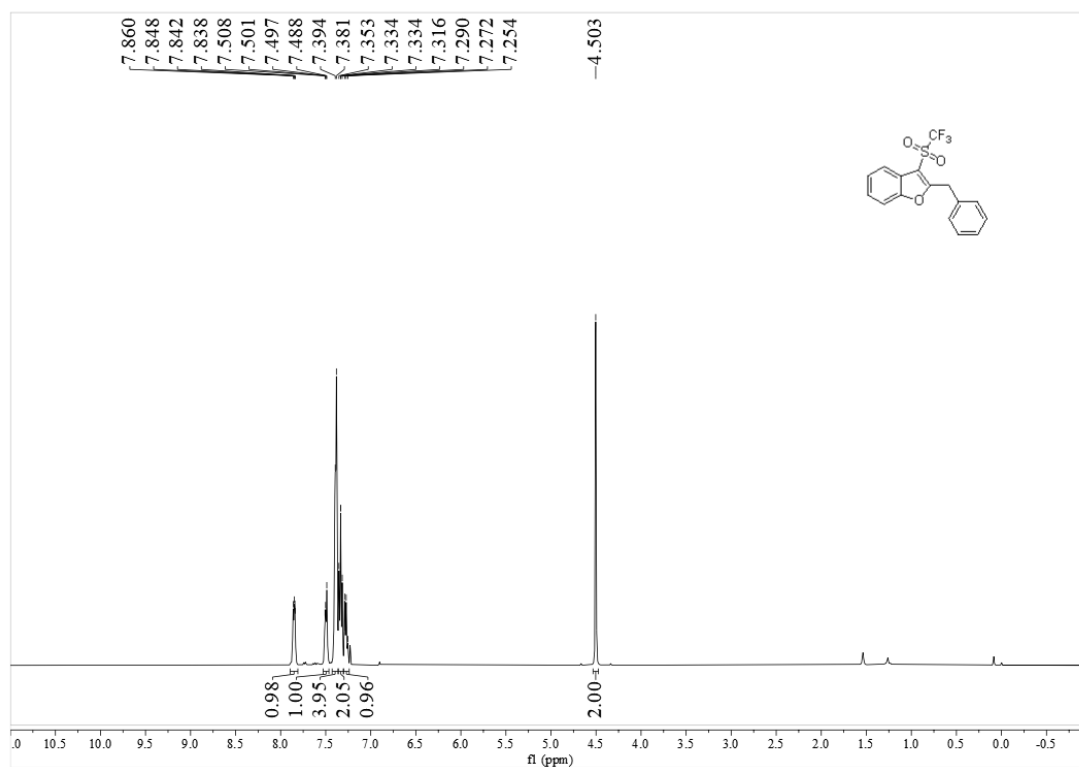

<sup>13</sup>C NMR (100 MHz, CDCl<sub>3</sub>) spectroscopy of **3a**

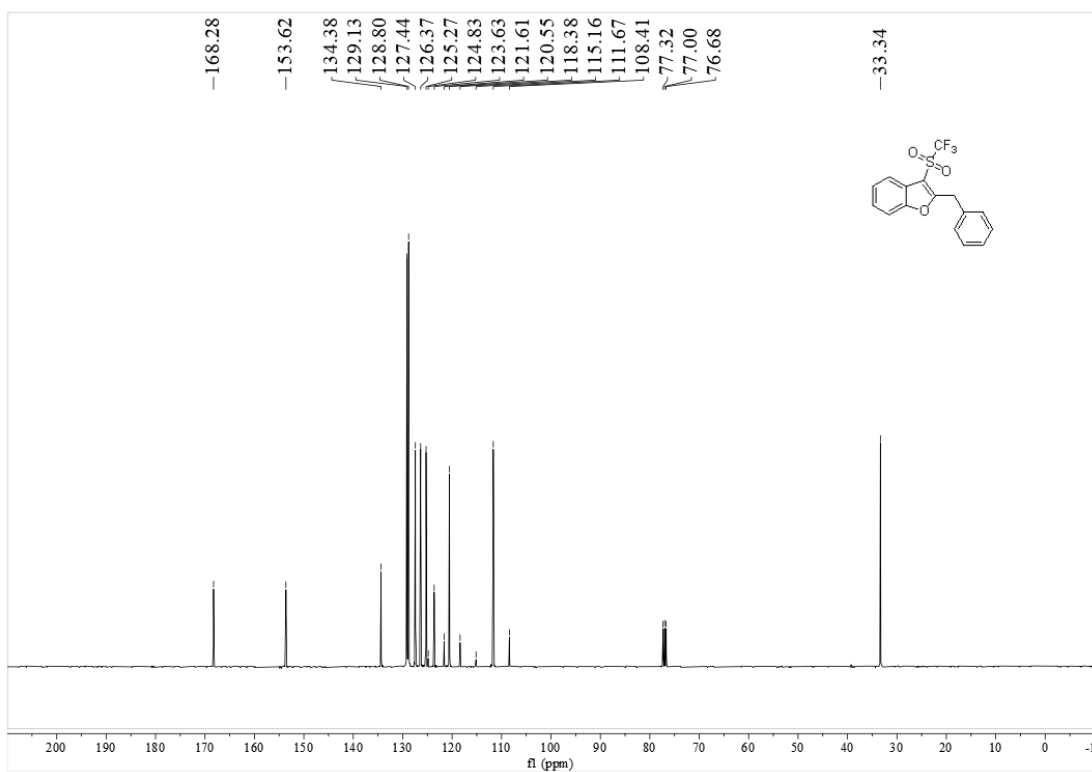



**<sup>19</sup>F NMR (376 MHz, CDCl<sub>3</sub>) spectroscopy of 3a**

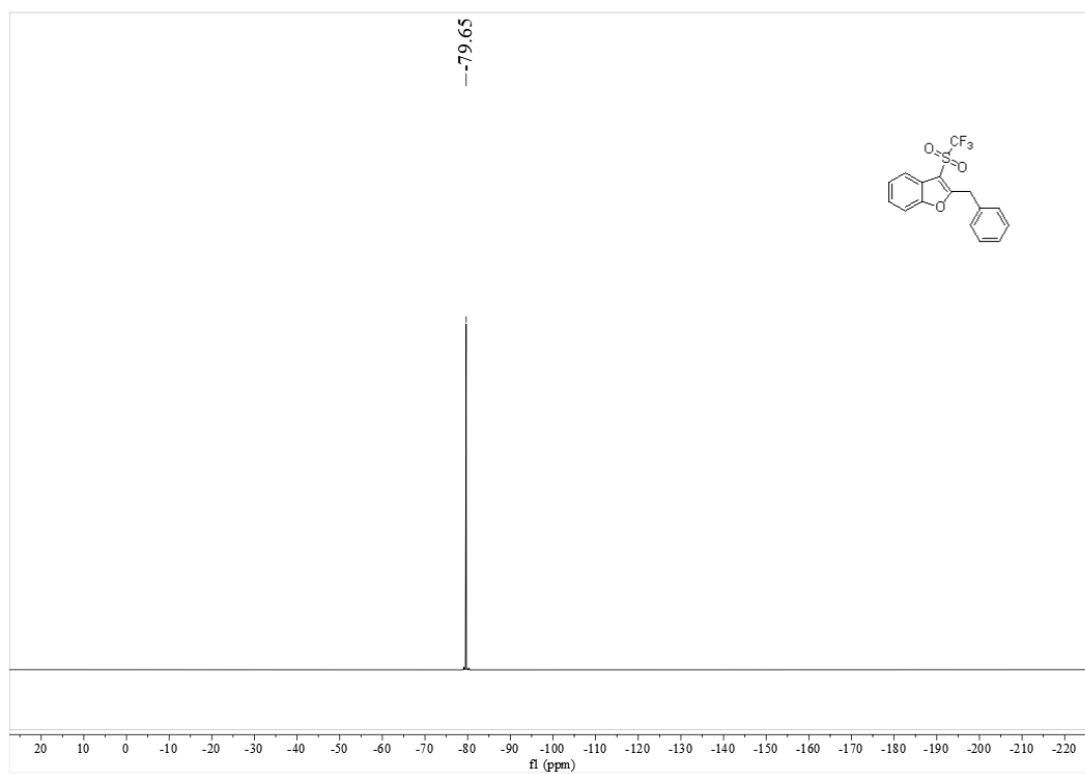

**<sup>1</sup>H NMR (400 MHz, CDCl<sub>3</sub>) spectroscopy of 3b**

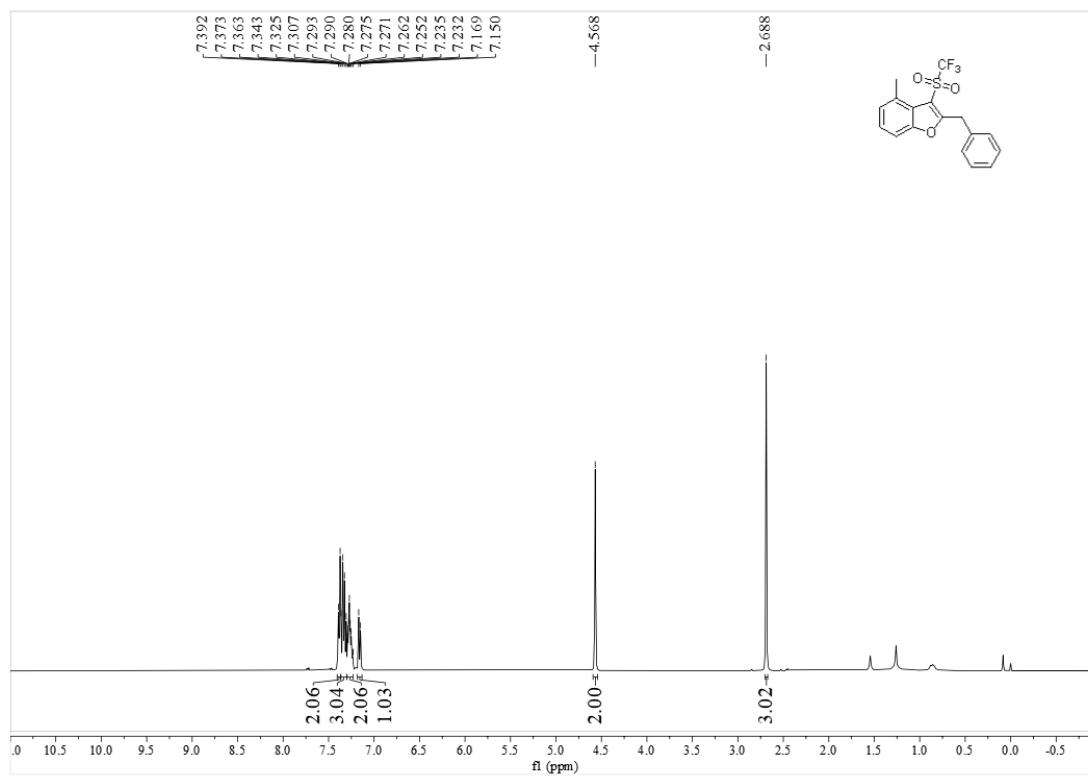

**<sup>13</sup>C NMR (100 MHz, CDCl<sub>3</sub>) spectroscopy of 3b**

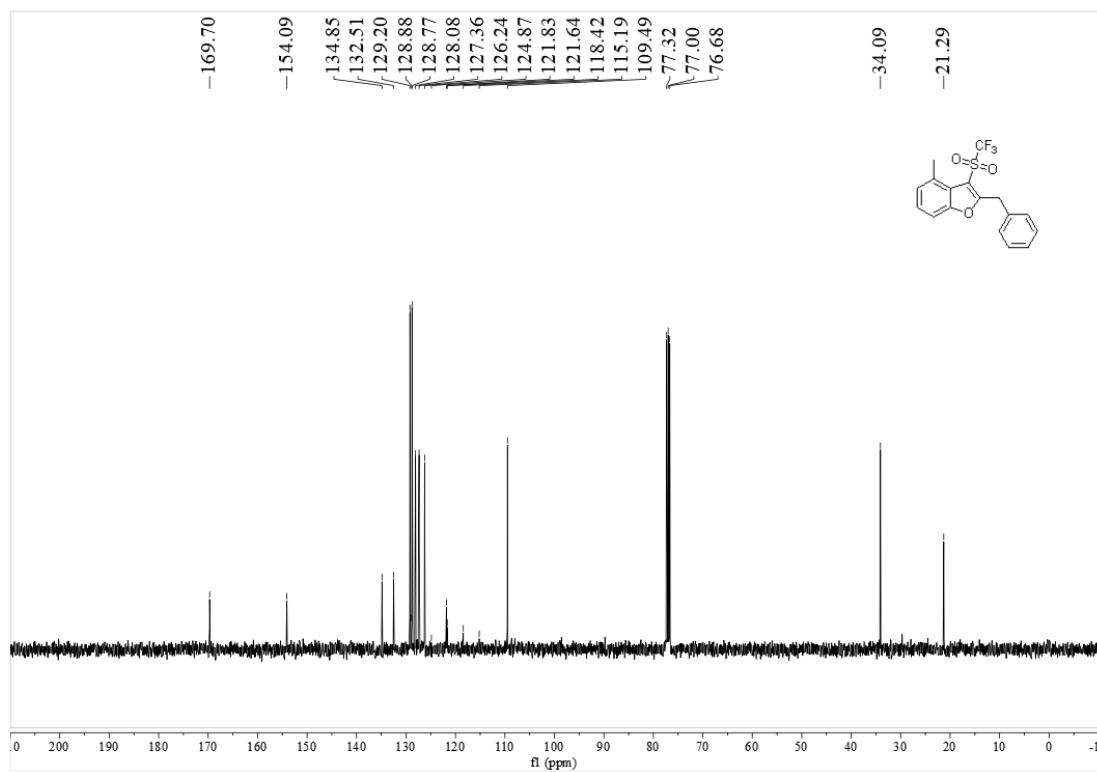

**<sup>19</sup>F NMR (376 MHz, CDCl<sub>3</sub>) spectroscopy of 3b**

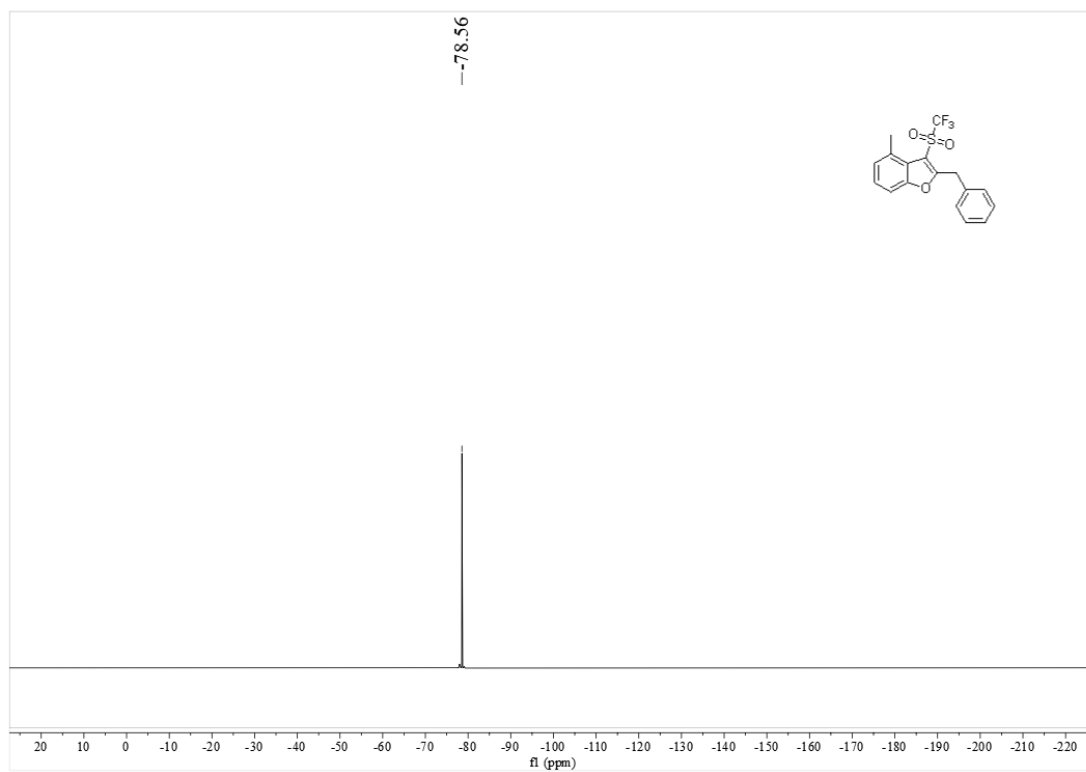

<sup>1</sup>H NMR (400 MHz, CDCl<sub>3</sub>) spectroscopy of **3c**

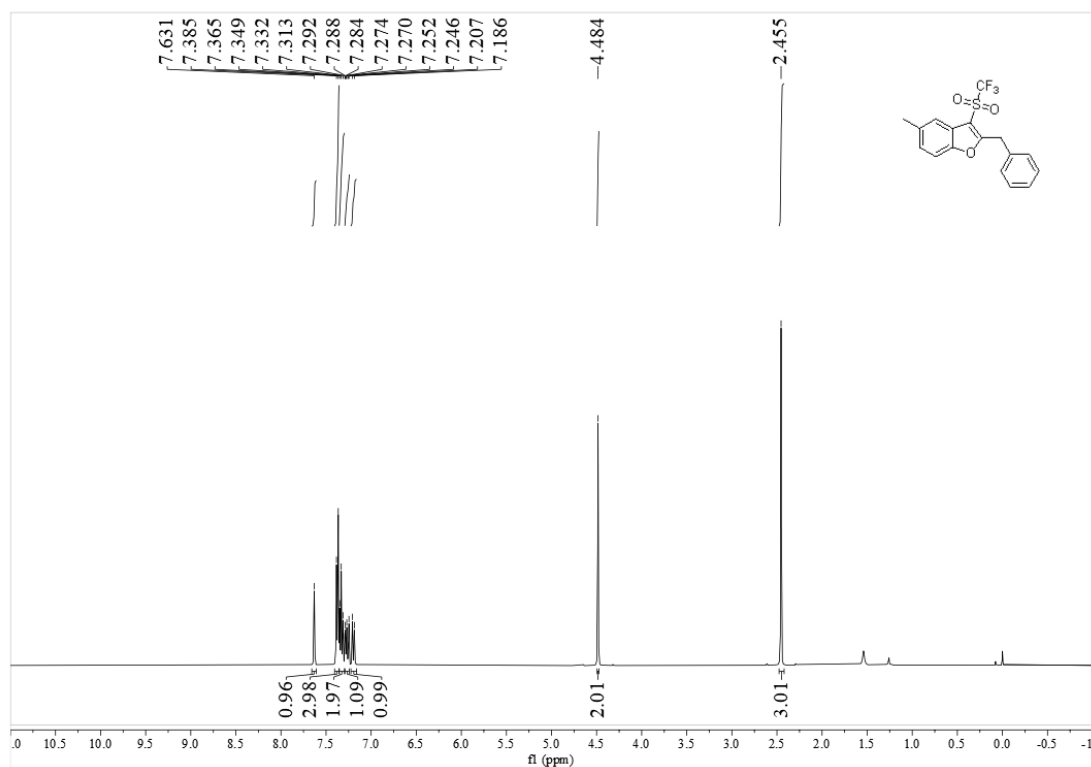

<sup>13</sup>C NMR (100 MHz, CDCl<sub>3</sub>) spectroscopy of **3c**

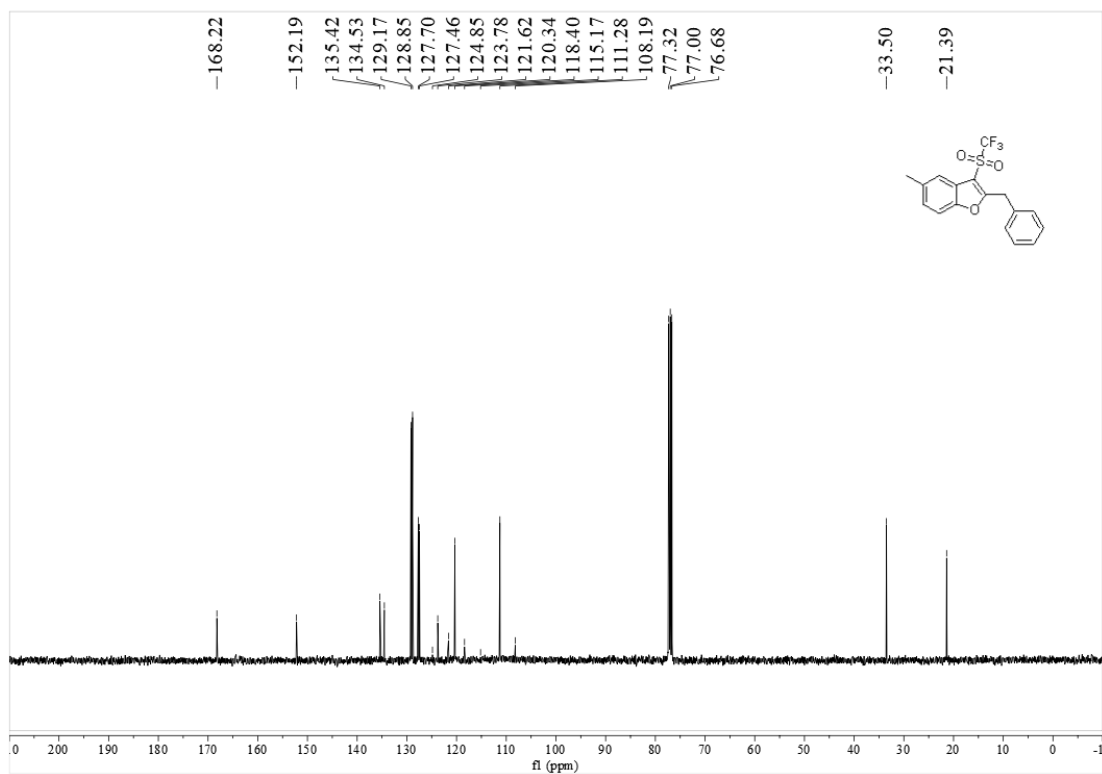

**<sup>19</sup>F NMR (376 MHz, CDCl<sub>3</sub>) spectroscopy of 3c**

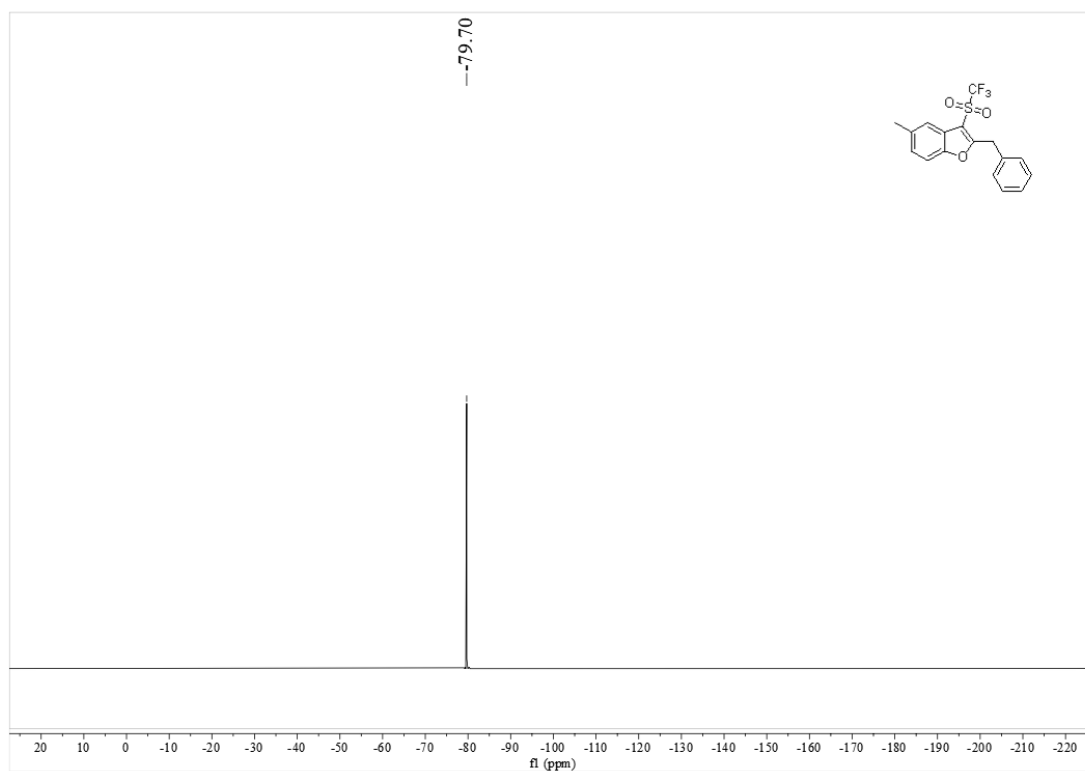

**<sup>1</sup>H NMR (400 MHz, CDCl<sub>3</sub>) spectroscopy of 3d**

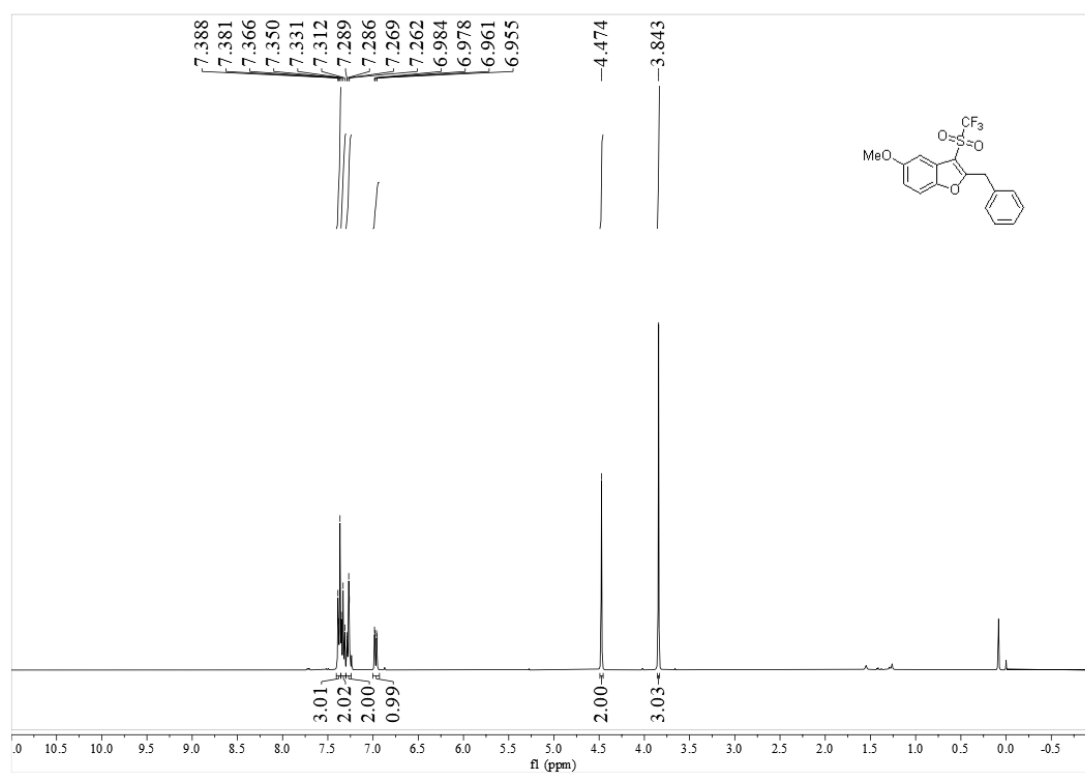

<sup>13</sup>C NMR (100 MHz, CDCl<sub>3</sub>) spectroscopy of **3d**

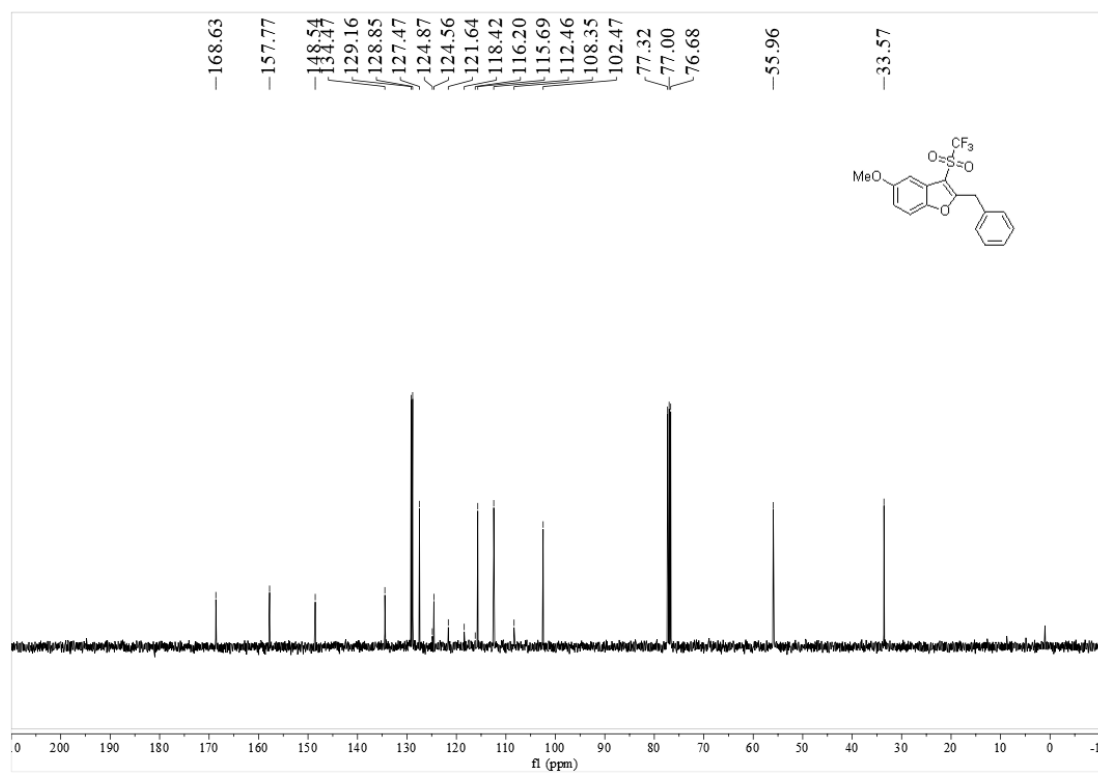

<sup>19</sup>F NMR (376 MHz, CDCl<sub>3</sub>) spectroscopy of **3d**

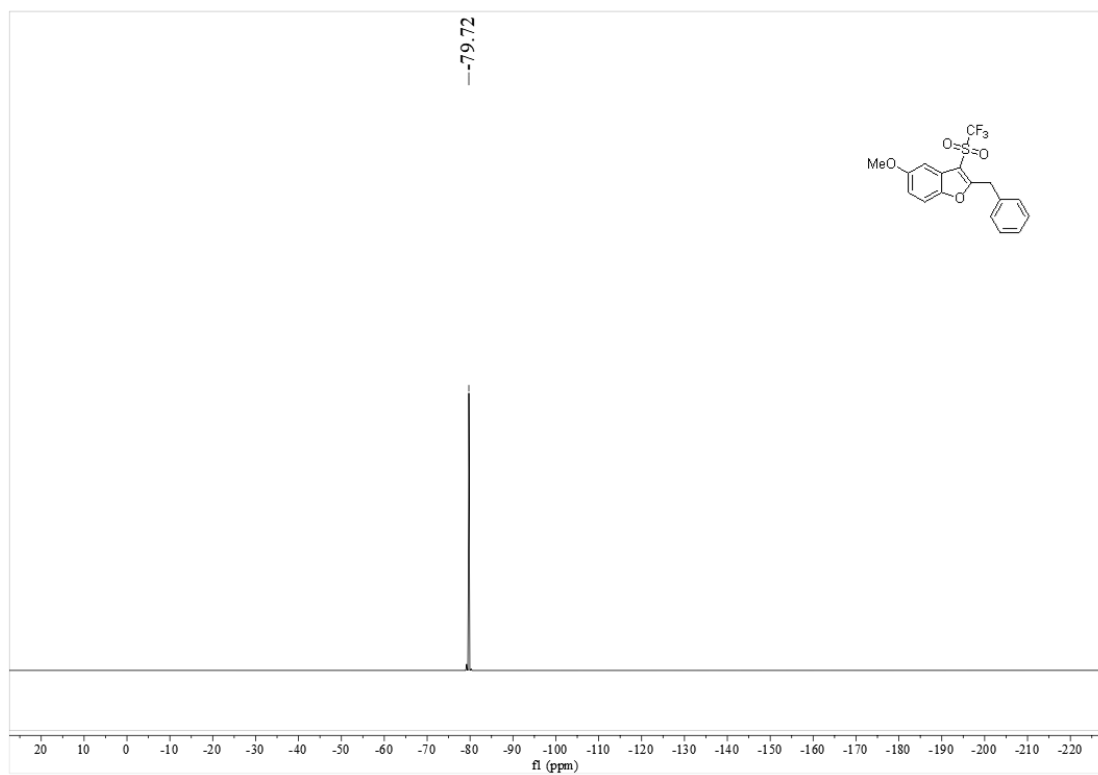

<sup>1</sup>H NMR (400 MHz, CDCl<sub>3</sub>) spectroscopy of **3e**

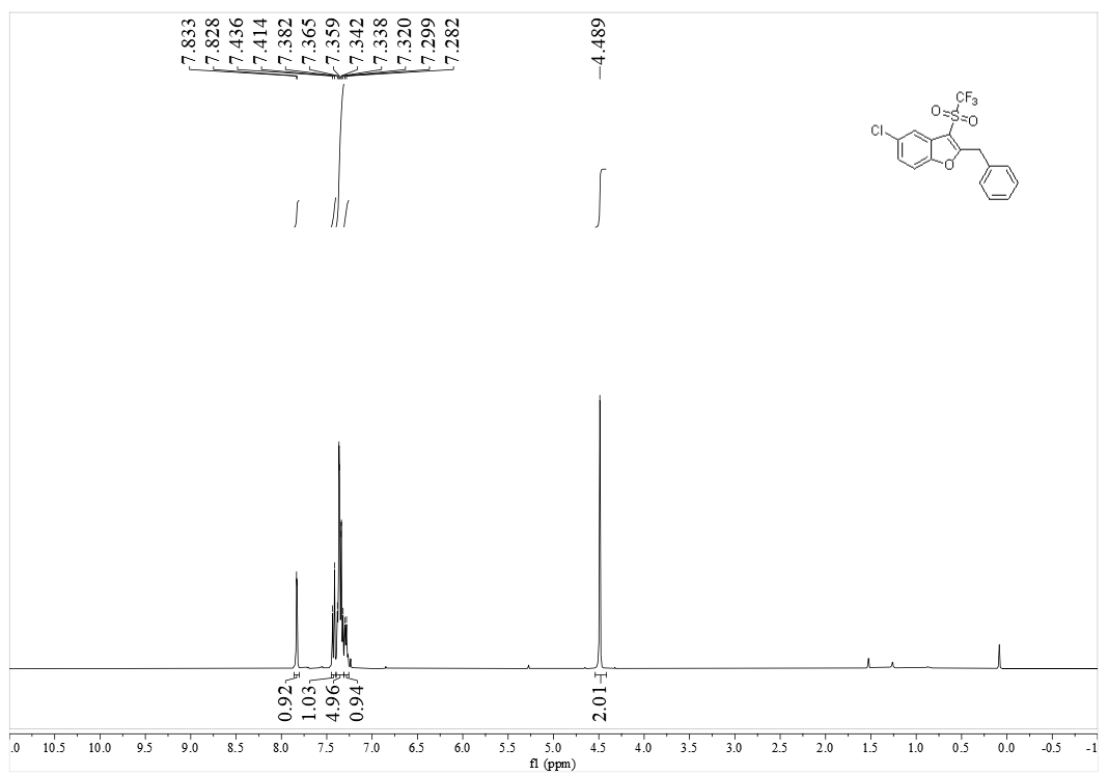

<sup>13</sup>C NMR (100 MHz, CDCl<sub>3</sub>) spectroscopy of **3e**

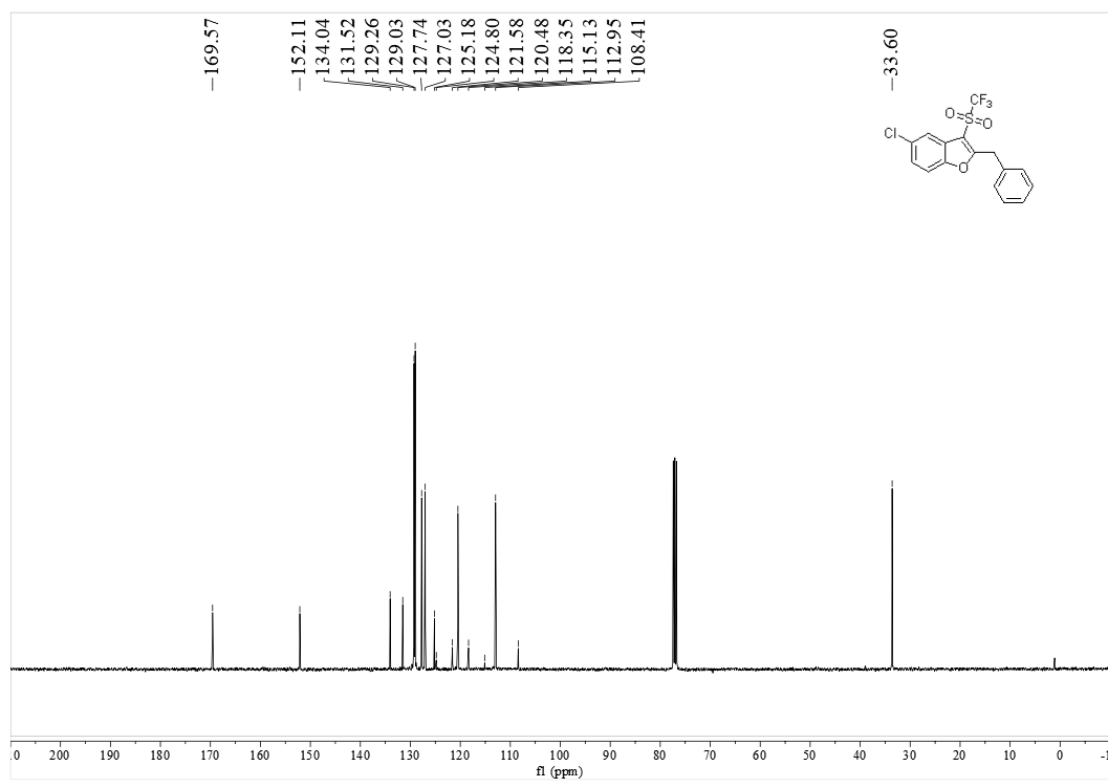

**<sup>19</sup>F NMR (376 MHz, CDCl<sub>3</sub>) spectroscopy of 3e**

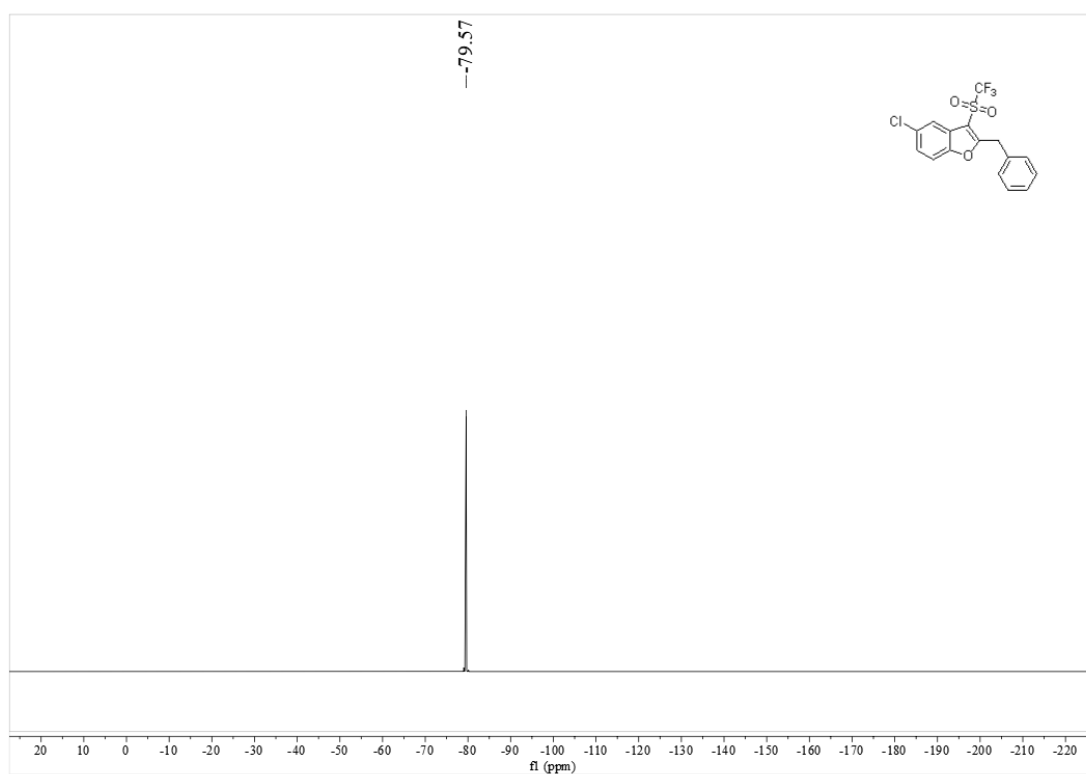

**<sup>1</sup>H NMR (400 MHz, CDCl<sub>3</sub>) spectroscopy of 3f**

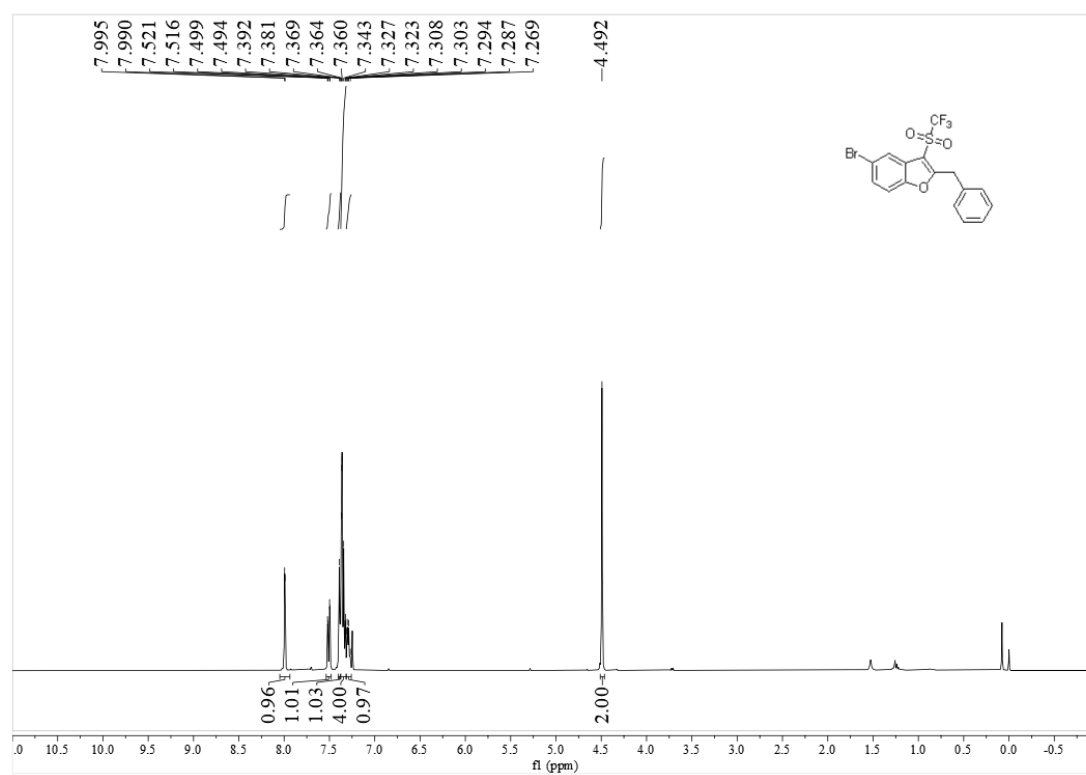

<sup>13</sup>C NMR (100 MHz, CDCl<sub>3</sub>) spectroscopy of **3f**

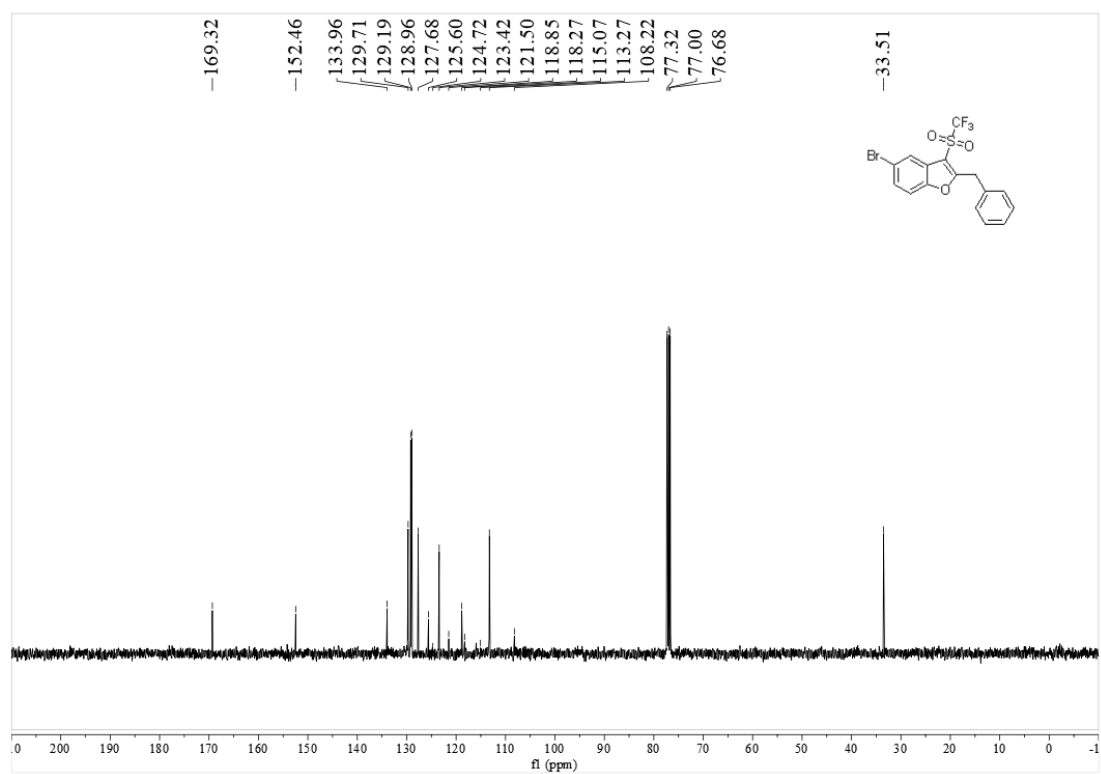

<sup>19</sup>F NMR (376 MHz, CDCl<sub>3</sub>) spectroscopy of **3f**

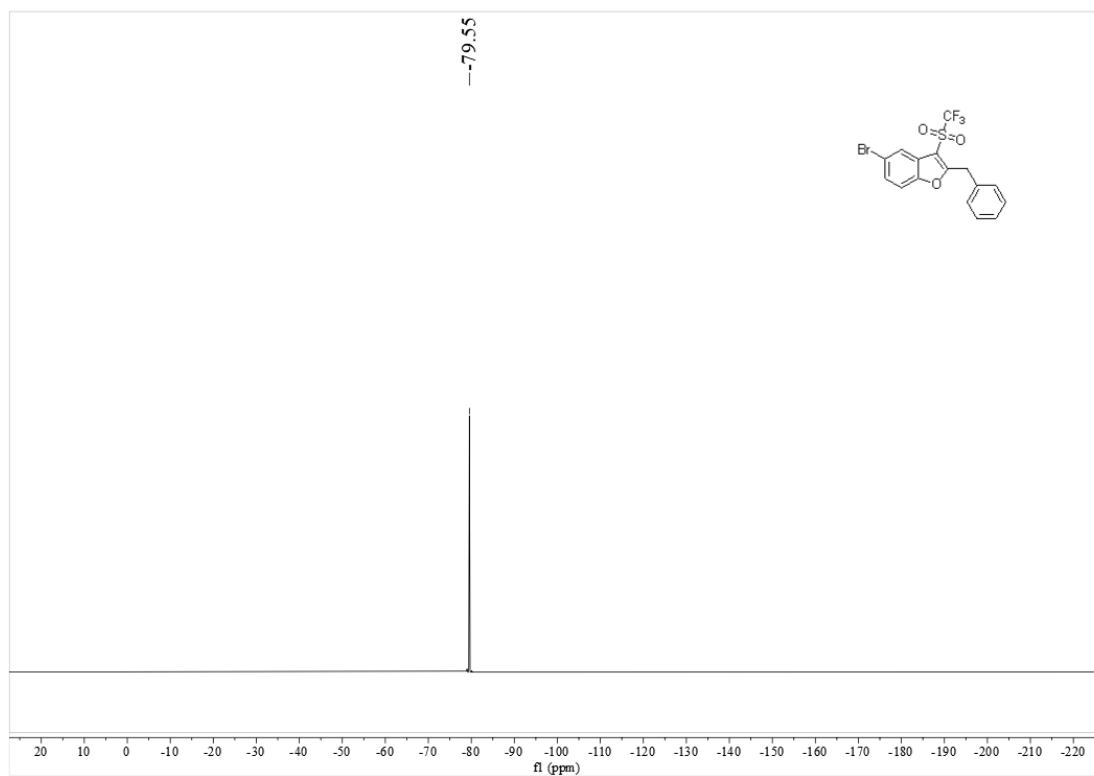



<sup>1</sup>H NMR (400 MHz, CDCl<sub>3</sub>) spectroscopy of **3g**

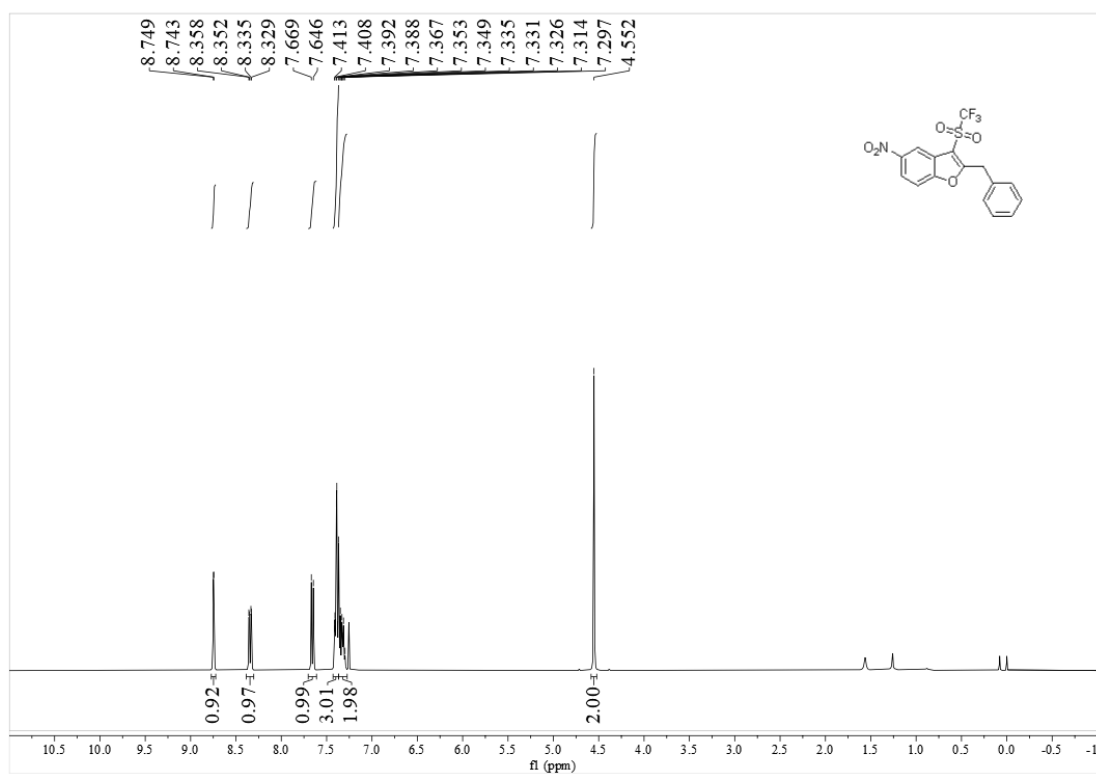

<sup>13</sup>C NMR (100 MHz, CDCl<sub>3</sub>) spectroscopy of **3g**

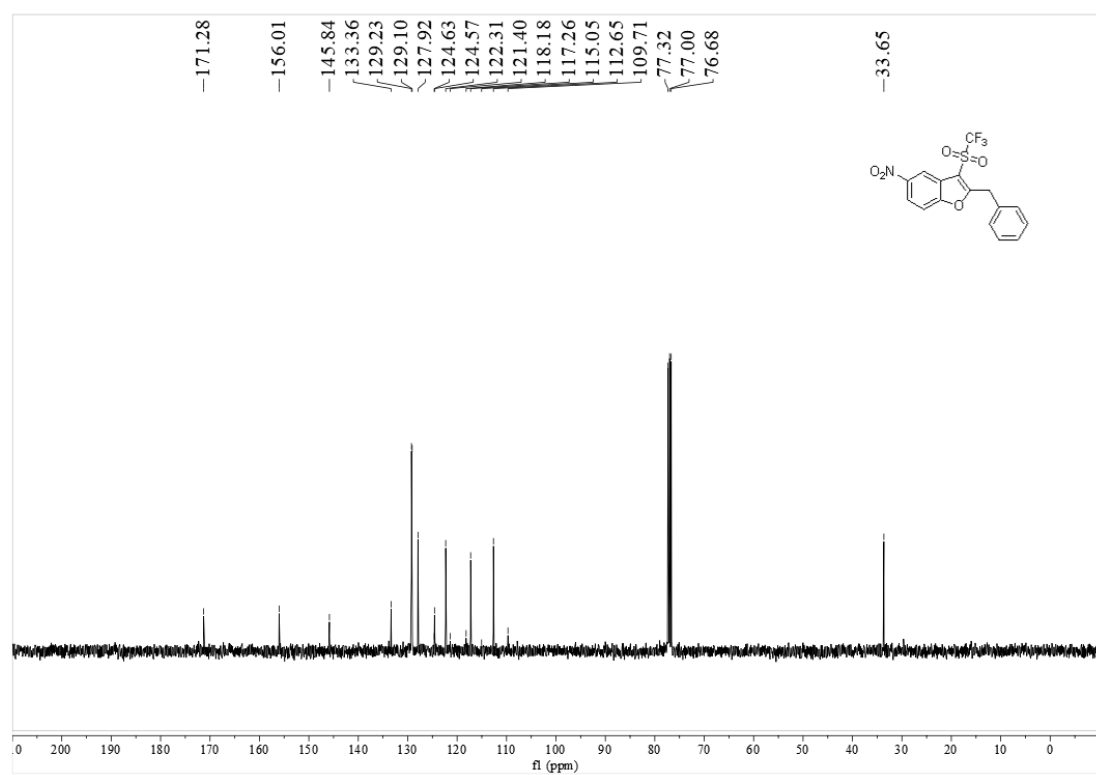

**<sup>19</sup>F NMR (376 MHz, CDCl<sub>3</sub>) spectroscopy of 3g**

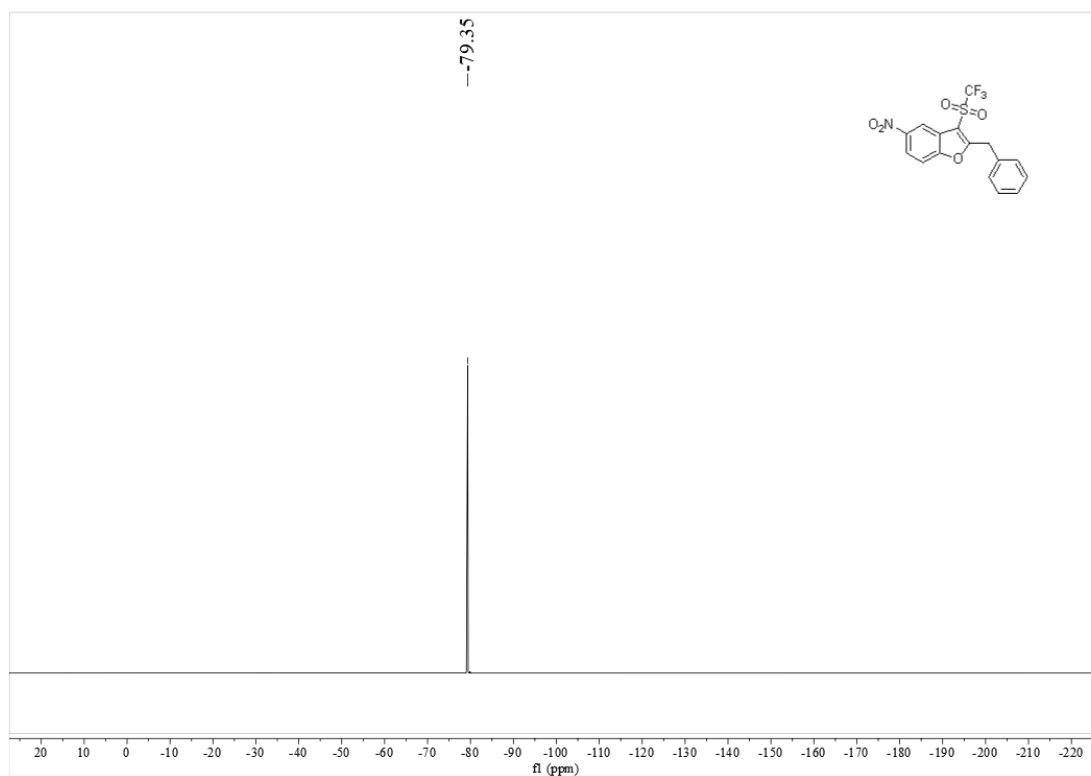

**<sup>1</sup>H NMR (400 MHz, CDCl<sub>3</sub>) spectroscopy of 3h**

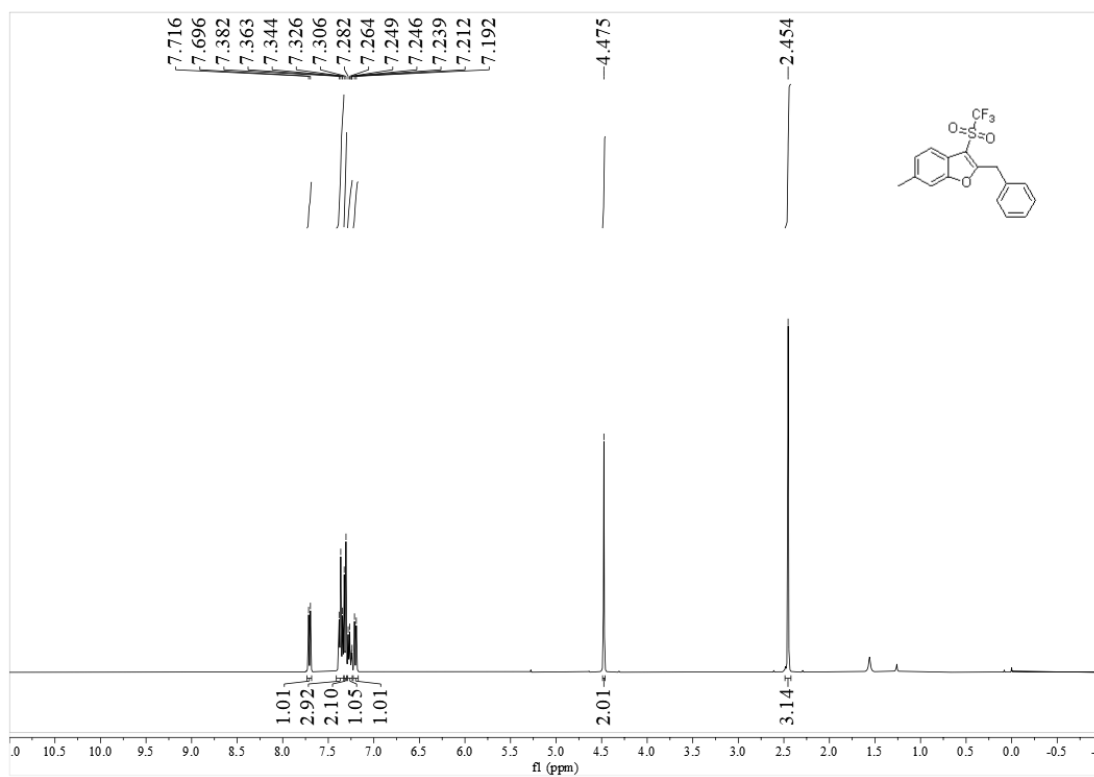

**<sup>13</sup>C NMR (100 MHz, CDCl<sub>3</sub>) spectroscopy of 3h**

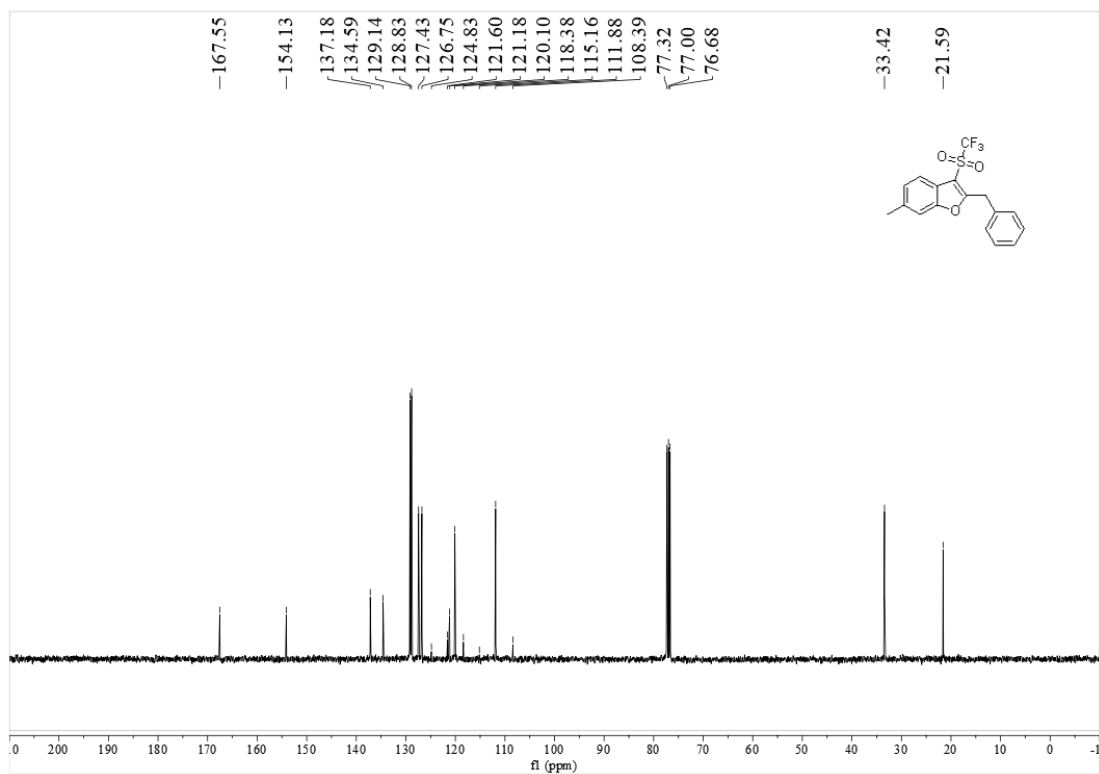

**<sup>19</sup>F NMR (376 MHz, CDCl<sub>3</sub>) spectroscopy of 3h**

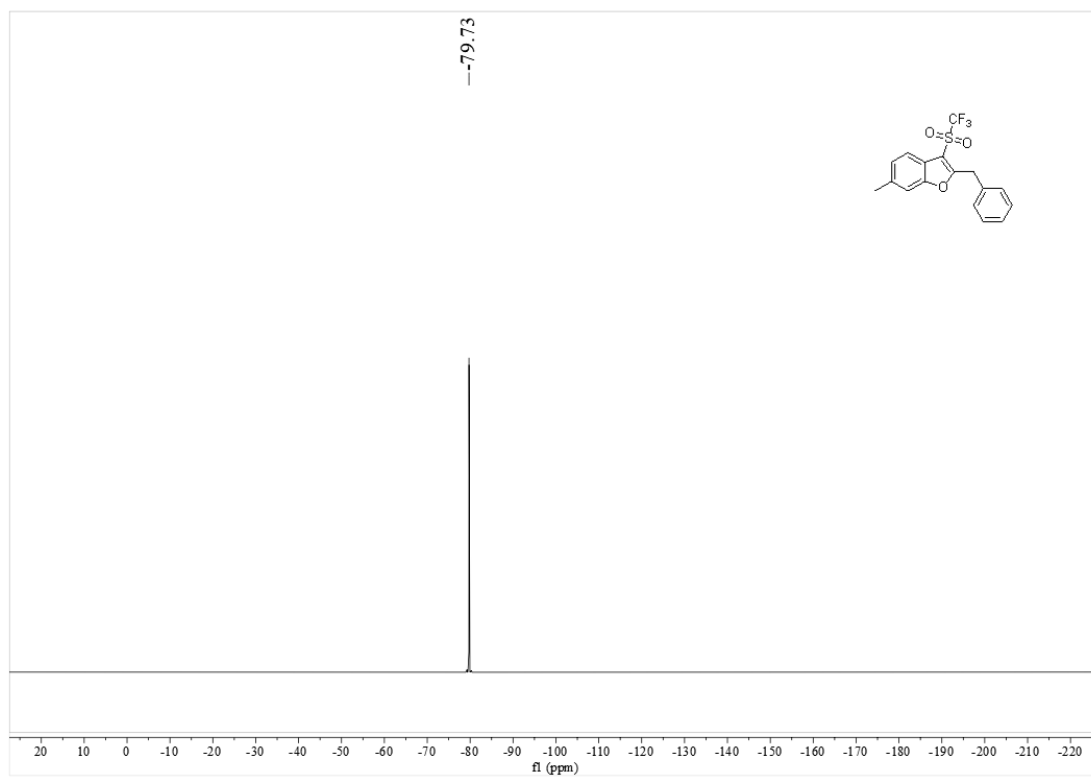

<sup>1</sup>H NMR (400 MHz, CDCl<sub>3</sub>) spectroscopy of **3i**

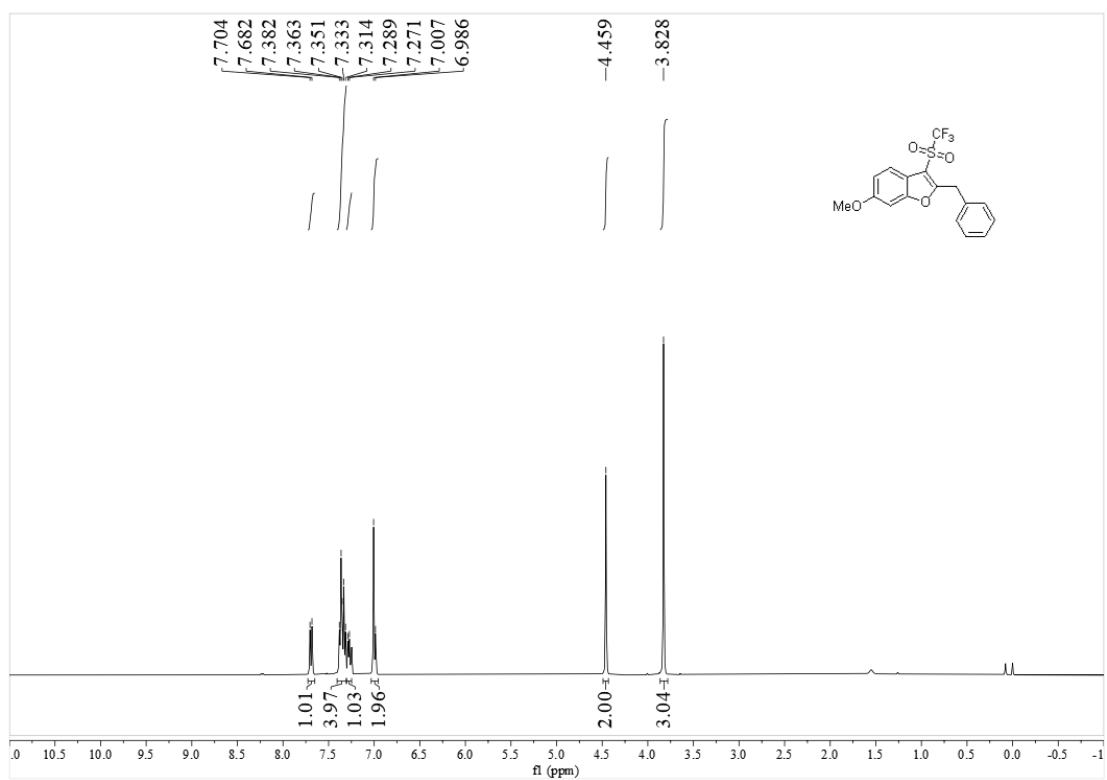

<sup>13</sup>C NMR (100 MHz, CDCl<sub>3</sub>) spectroscopy of **3i**

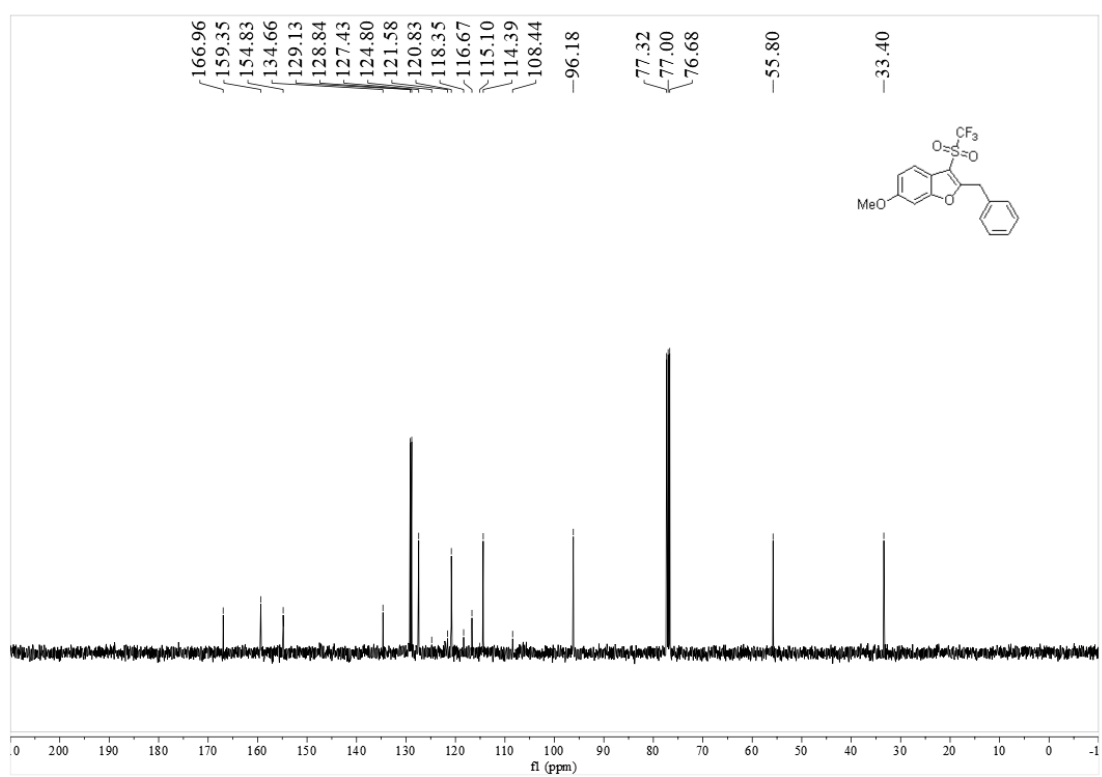

<sup>19</sup>F NMR (376 MHz, CDCl<sub>3</sub>) spectroscopy of **3i**

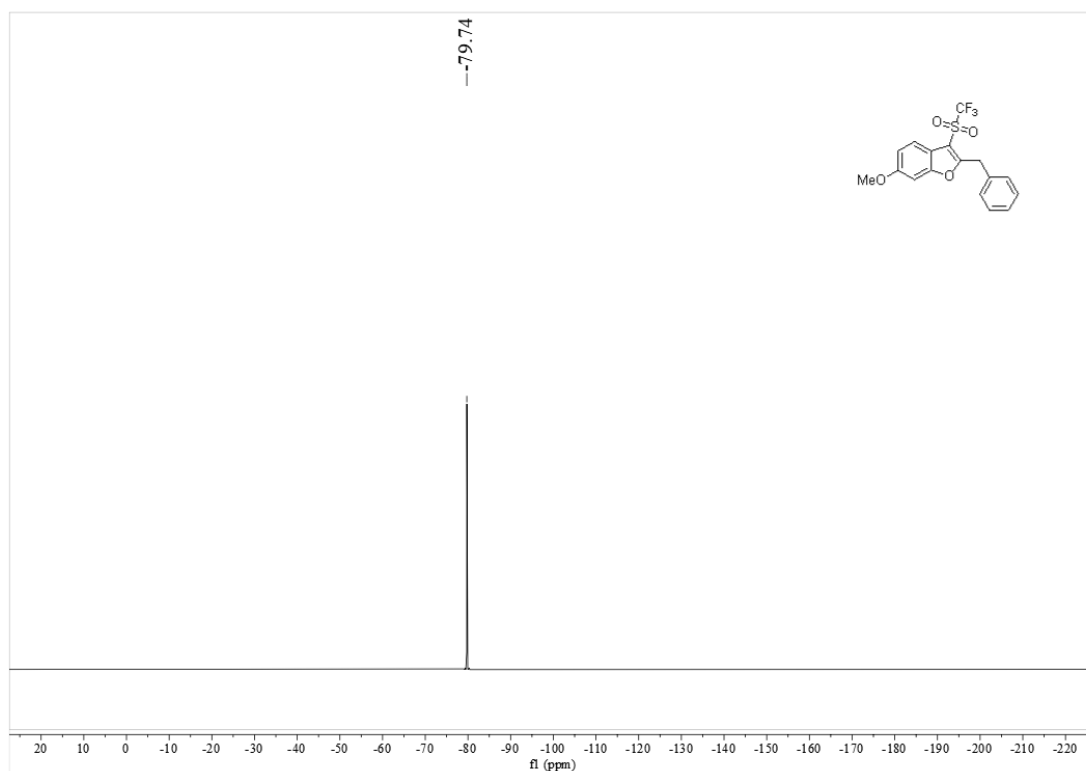

<sup>1</sup>H NMR (400 MHz, CDCl<sub>3</sub>) spectroscopy of **3j**

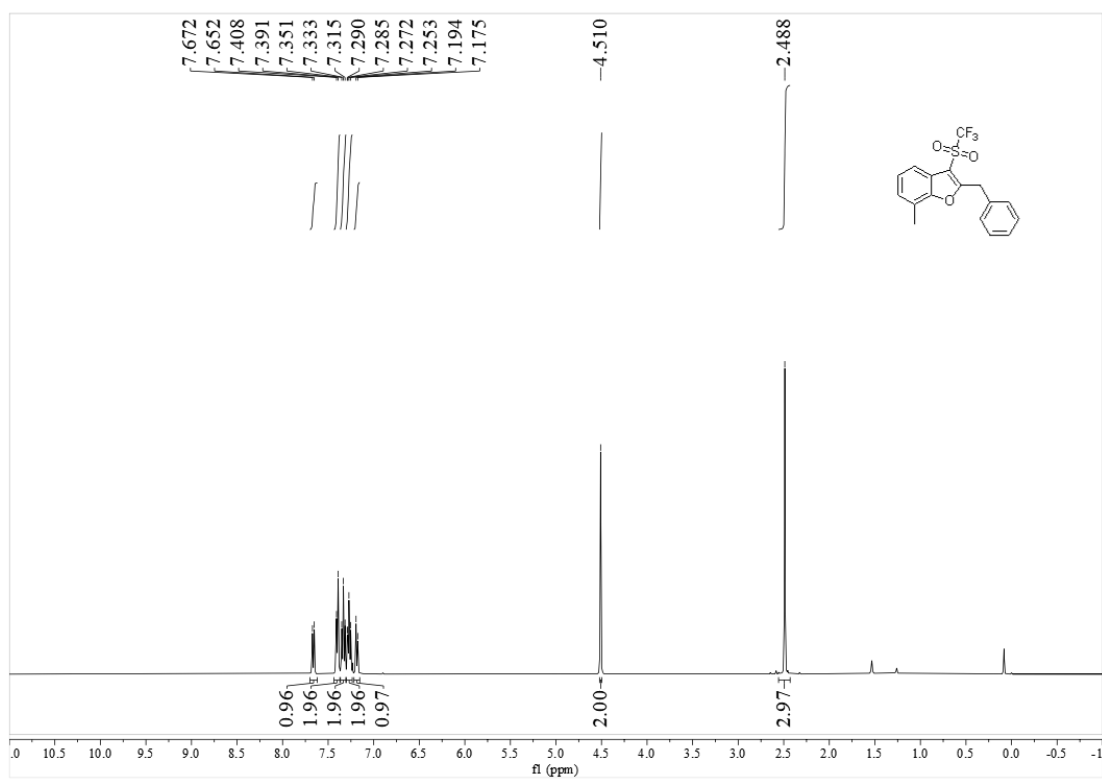

**<sup>13</sup>C NMR (100 MHz, CDCl<sub>3</sub>) spectroscopy of 3j**

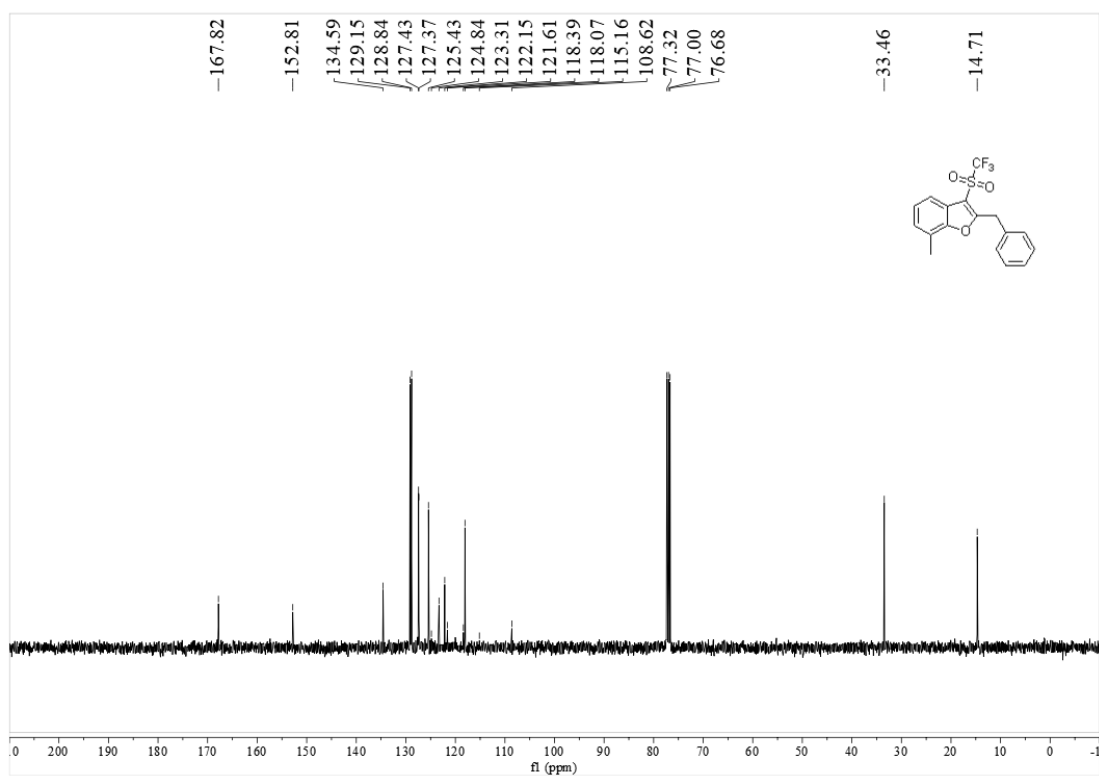

**<sup>19</sup>F NMR (376 MHz, CDCl<sub>3</sub>) spectroscopy of 3j**

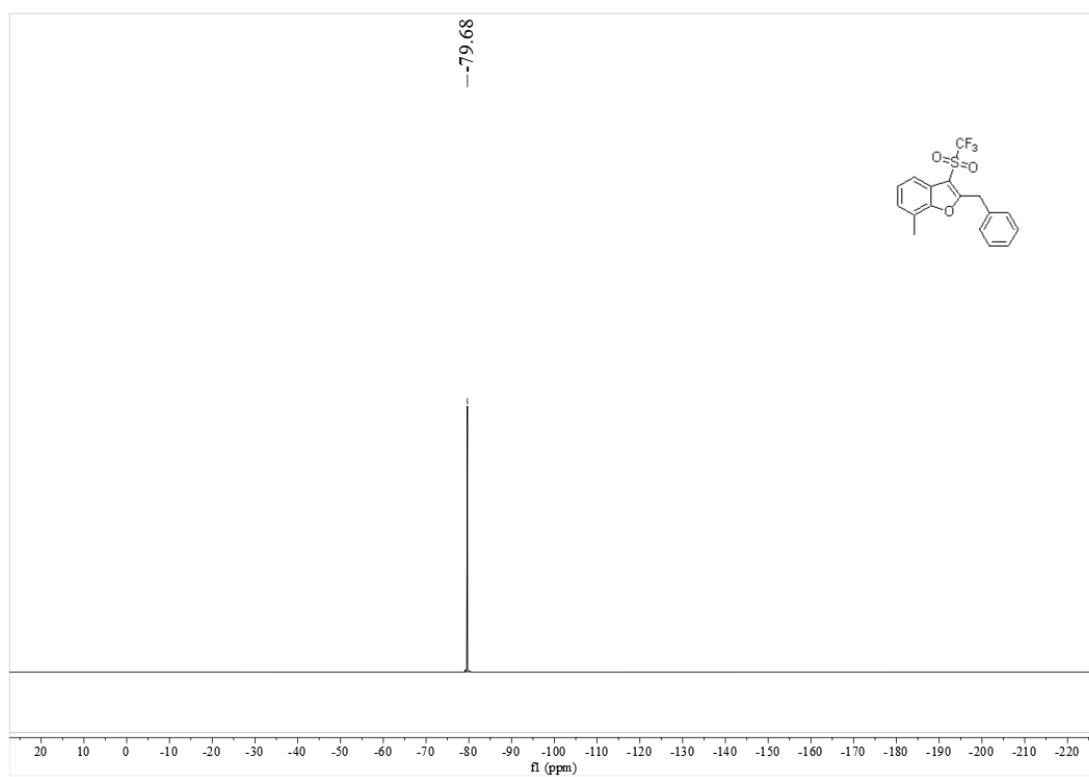

**<sup>1</sup>H NMR (400 MHz, CDCl<sub>3</sub>) spectroscopy of 3k**

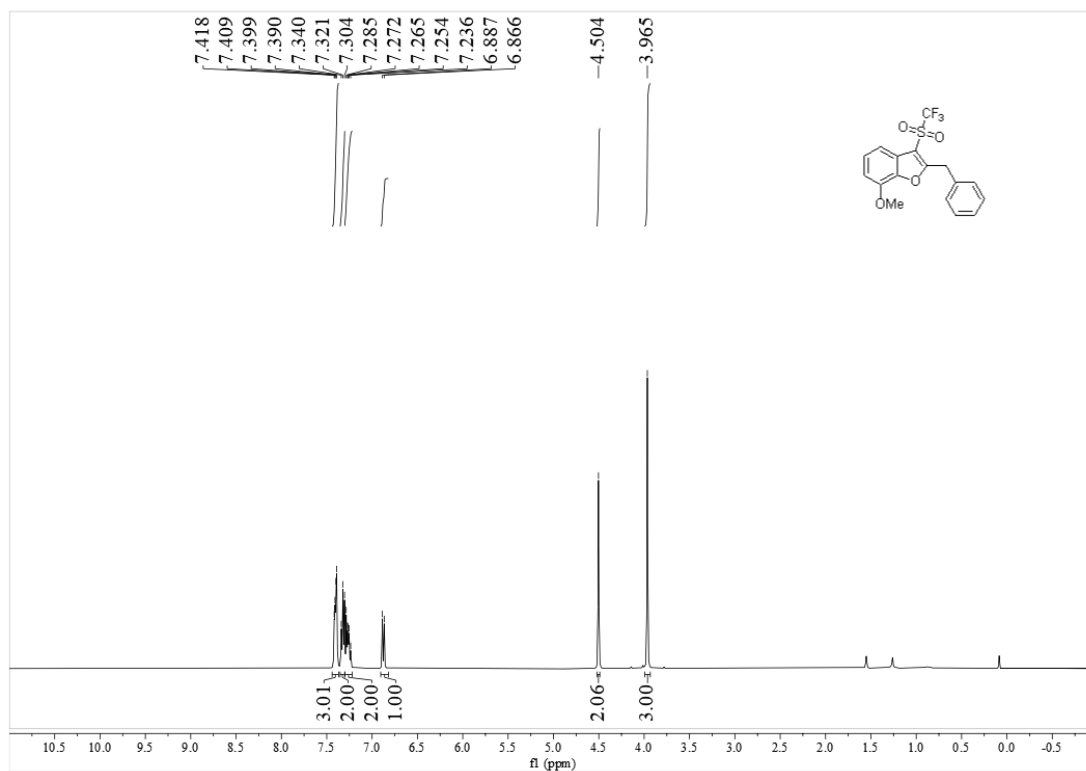

**<sup>13</sup>C NMR (100 MHz, CDCl<sub>3</sub>) spectroscopy of 3k**

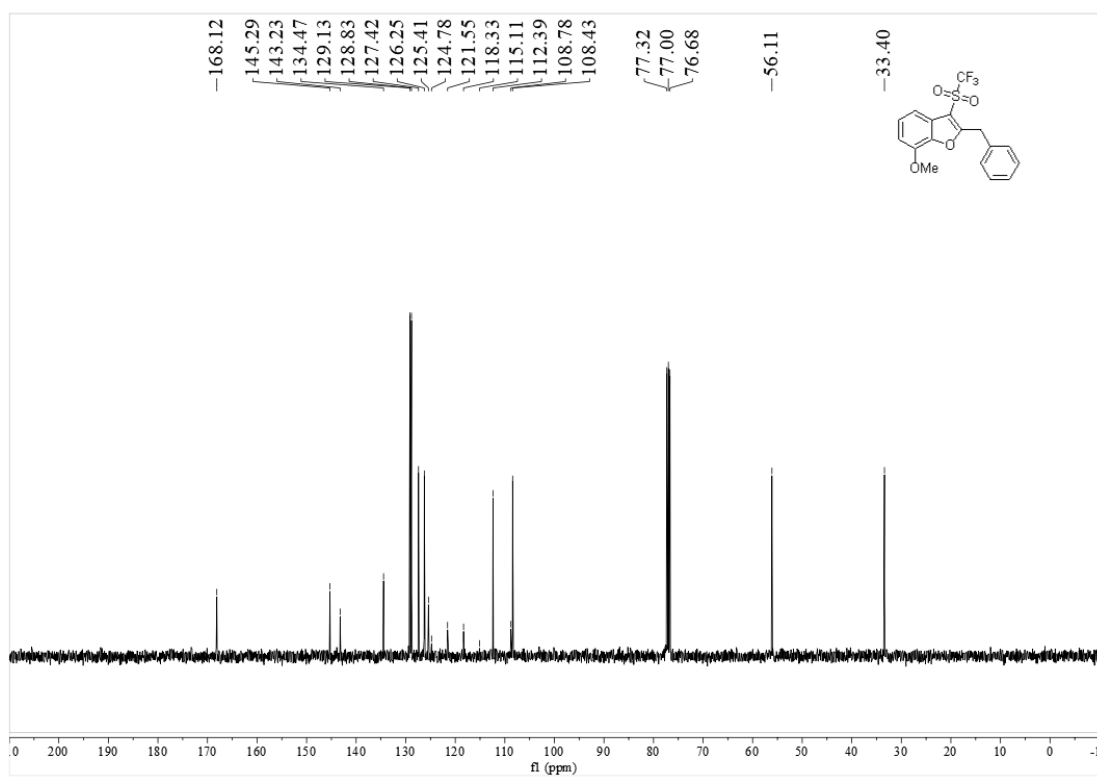

**<sup>19</sup>F NMR (376 MHz, CDCl<sub>3</sub>) spectroscopy of 3k**

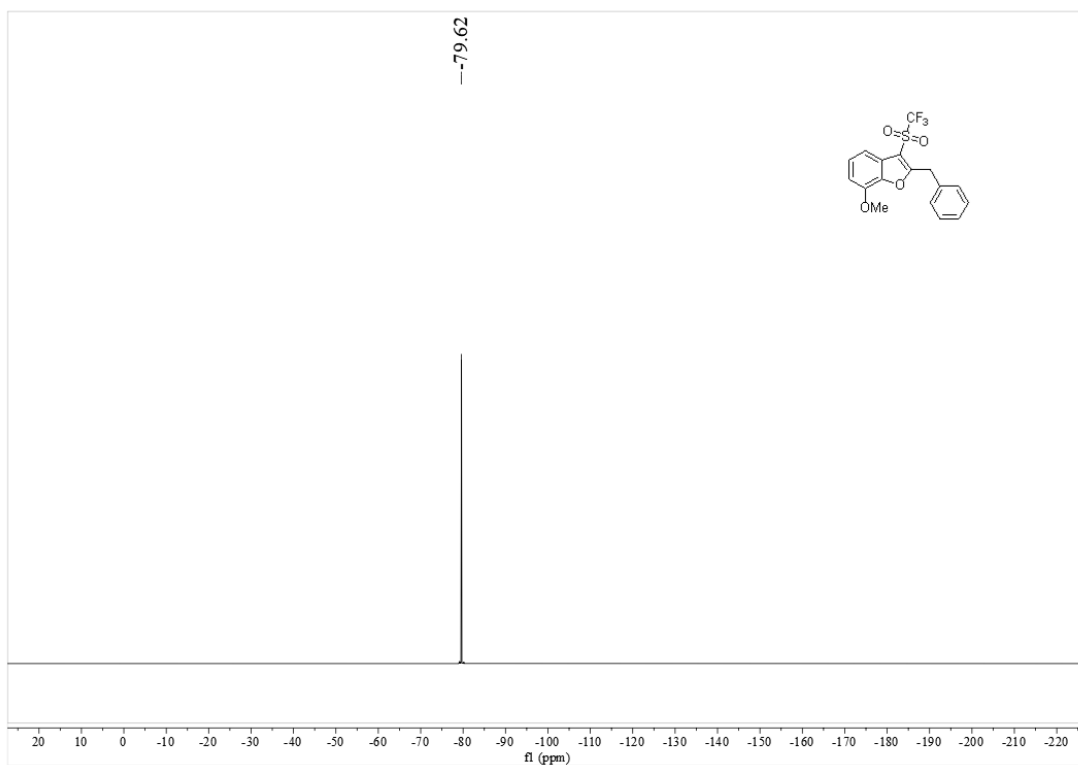

**<sup>1</sup>H NMR (400 MHz, CDCl<sub>3</sub>) spectroscopy of 3l**

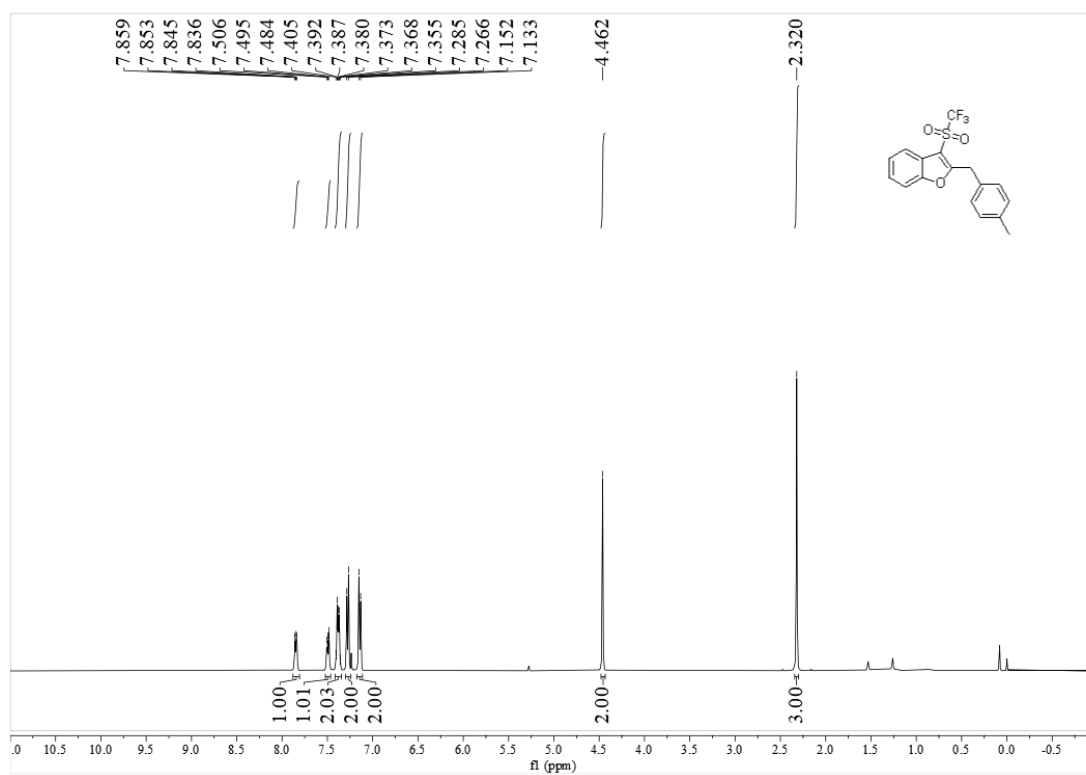



<sup>13</sup>C NMR (100 MHz, CDCl<sub>3</sub>) spectroscopy of **31**

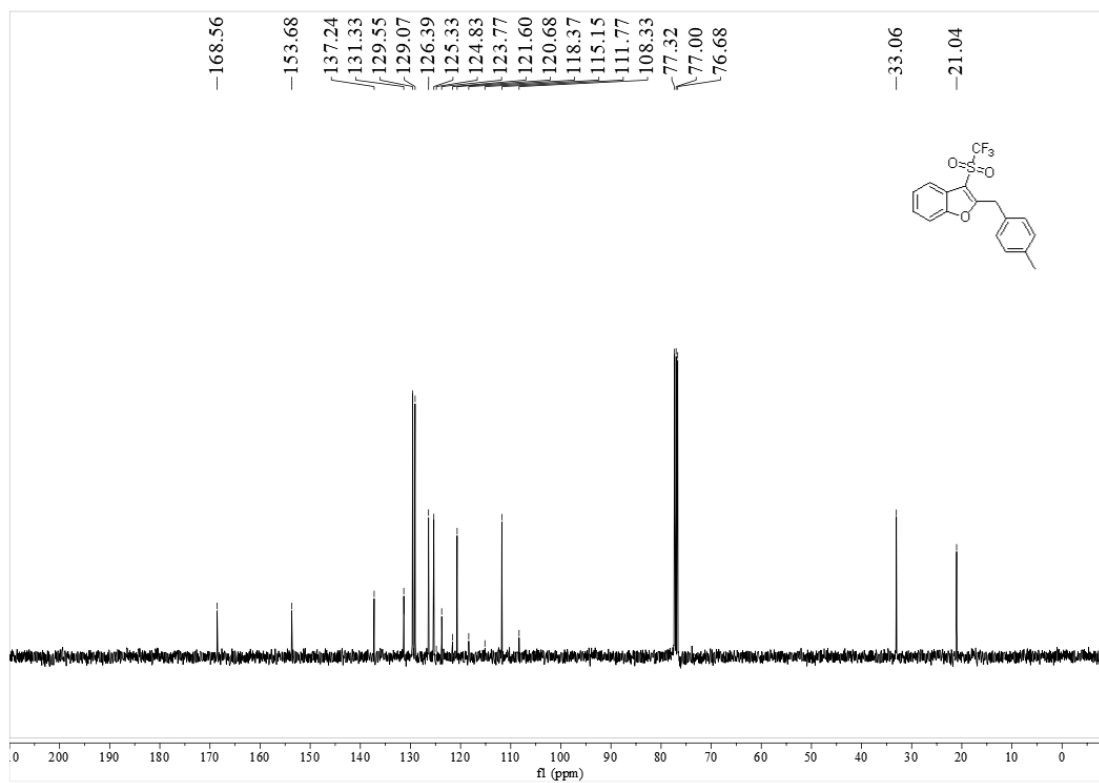

<sup>19</sup>F NMR (376 MHz, CDCl<sub>3</sub>) spectroscopy of **31**

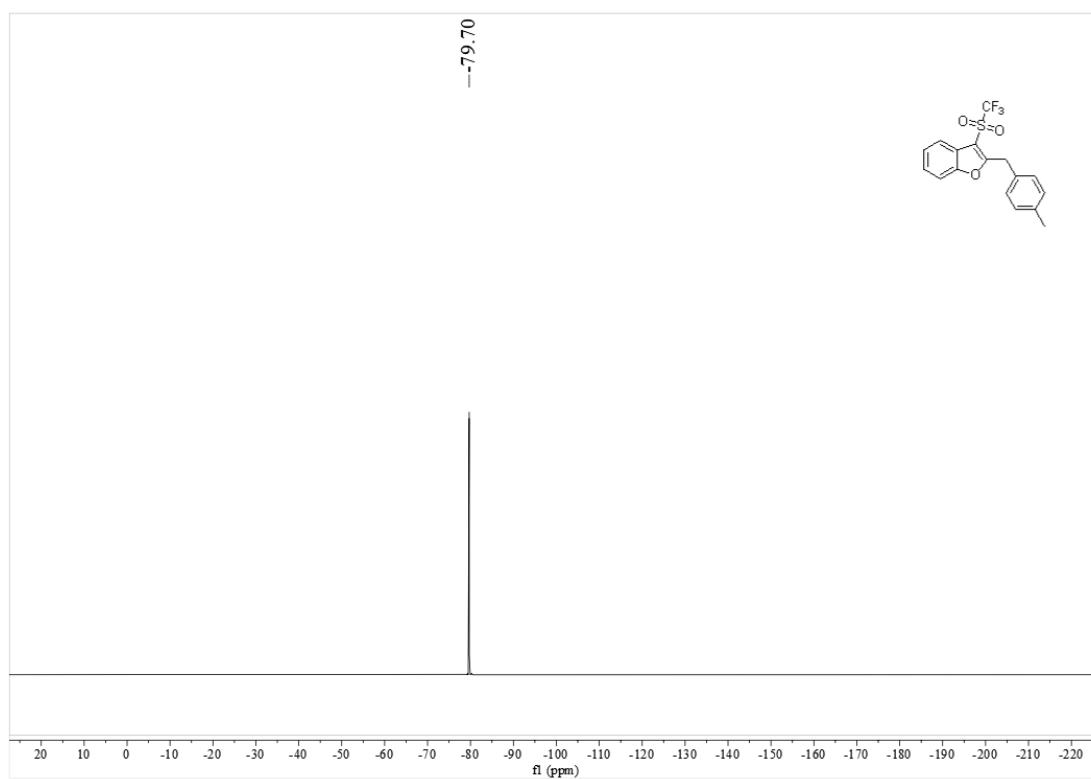

<sup>1</sup>H NMR (400 MHz, CDCl<sub>3</sub>) spectroscopy of **3m**

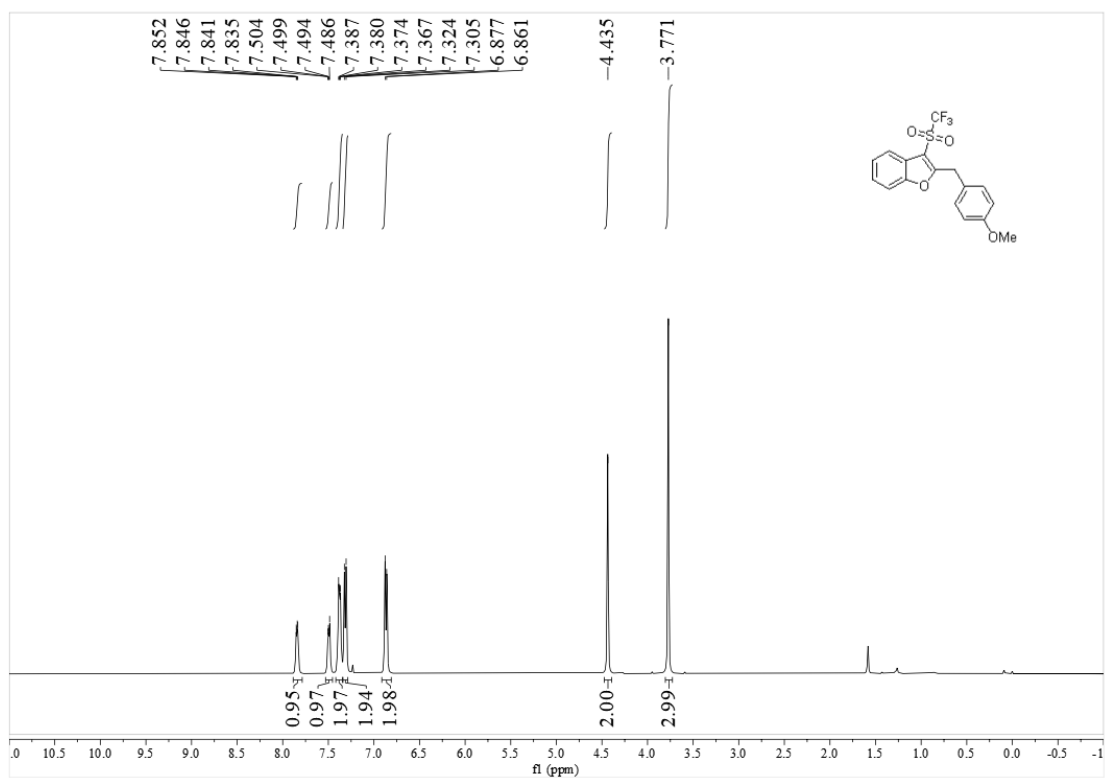

<sup>13</sup>C NMR (100 MHz, CDCl<sub>3</sub>) spectroscopy of **3m**

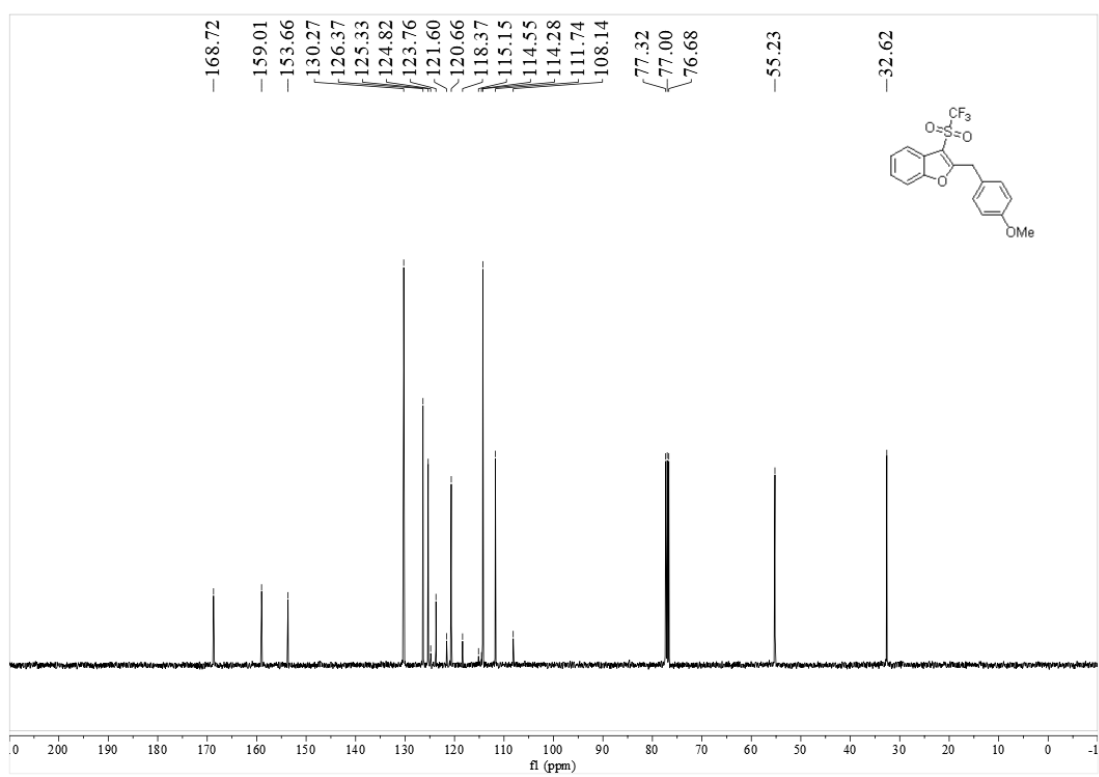

<sup>19</sup>F NMR (376 MHz, CDCl<sub>3</sub>) spectroscopy of **3m**

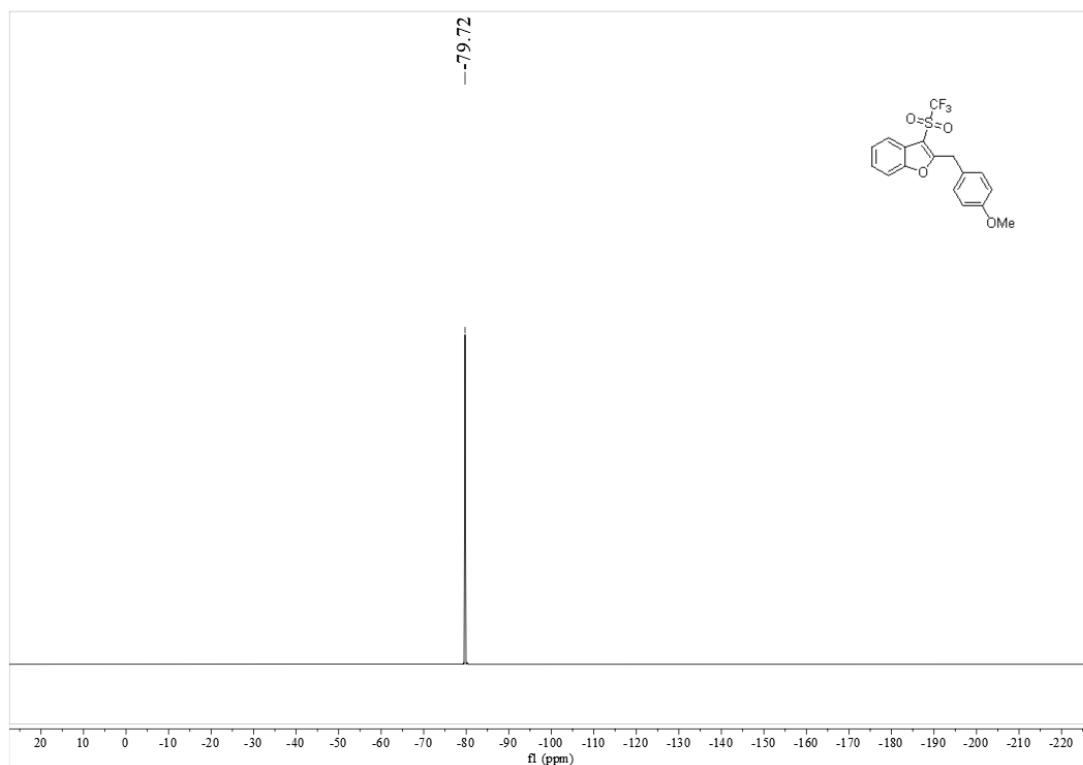

<sup>1</sup>H NMR (400 MHz, CDCl<sub>3</sub>) spectroscopy of **3n**

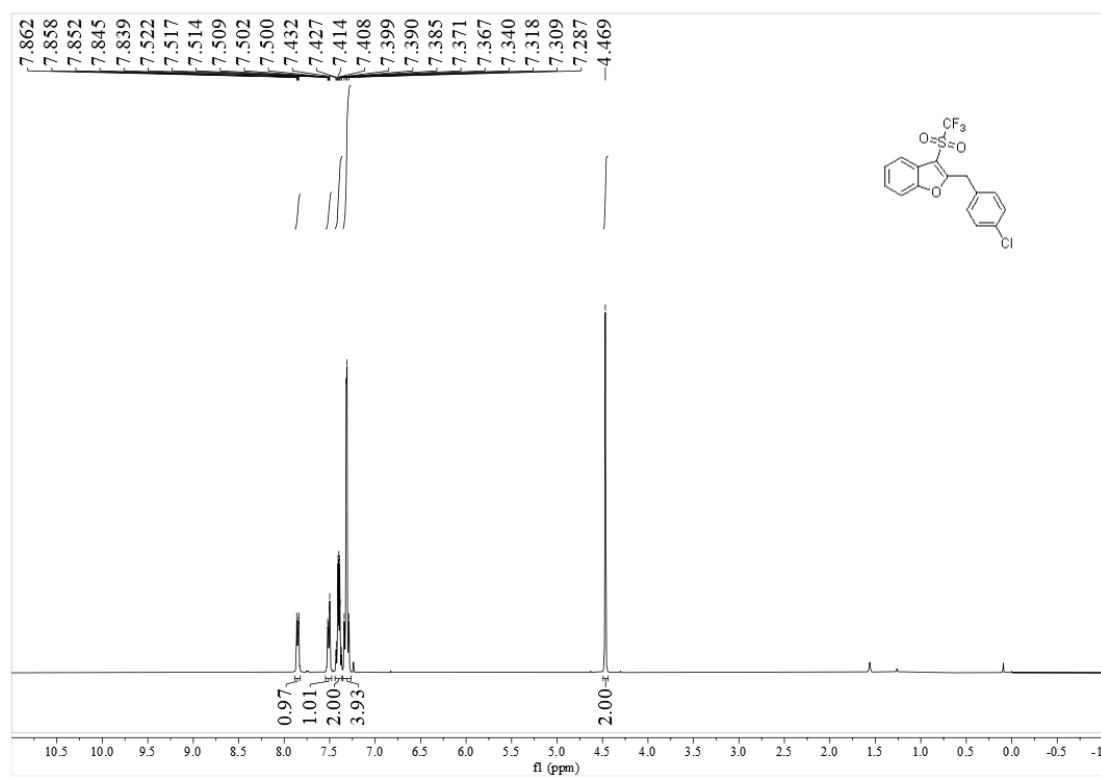

**<sup>13</sup>C NMR (100 MHz, CDCl<sub>3</sub>) spectroscopy of 3n**

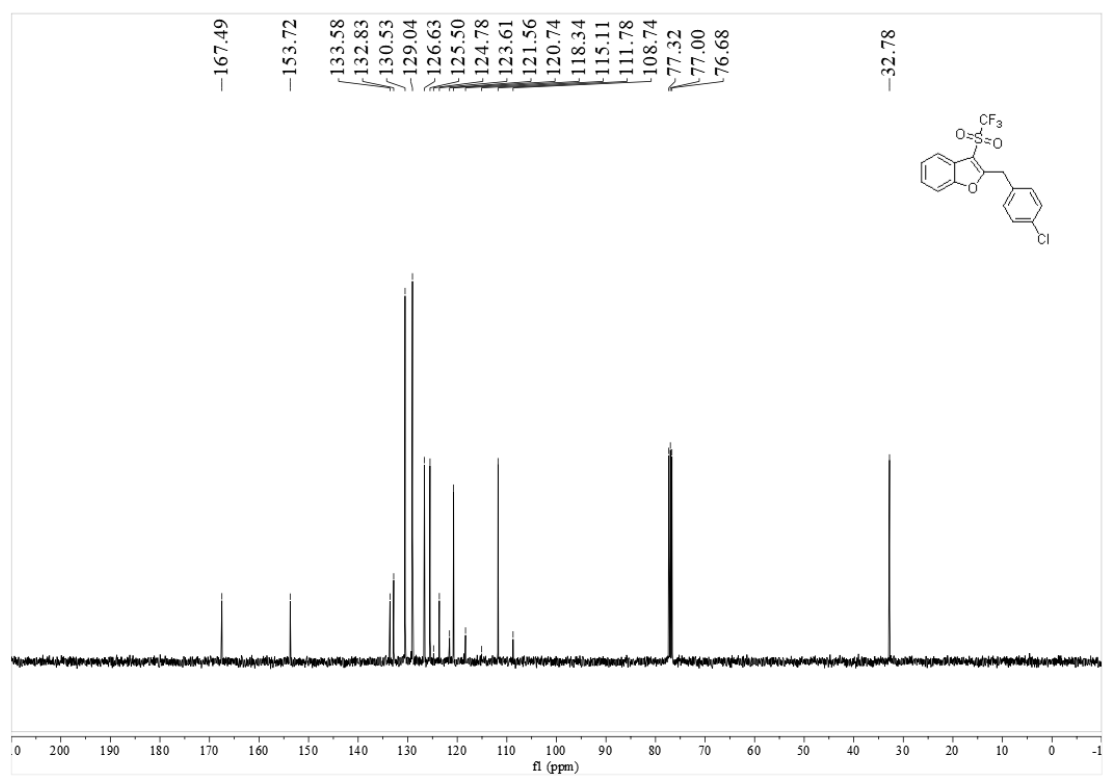

**<sup>19</sup>F NMR (376 MHz, CDCl<sub>3</sub>) spectroscopy of 3n**

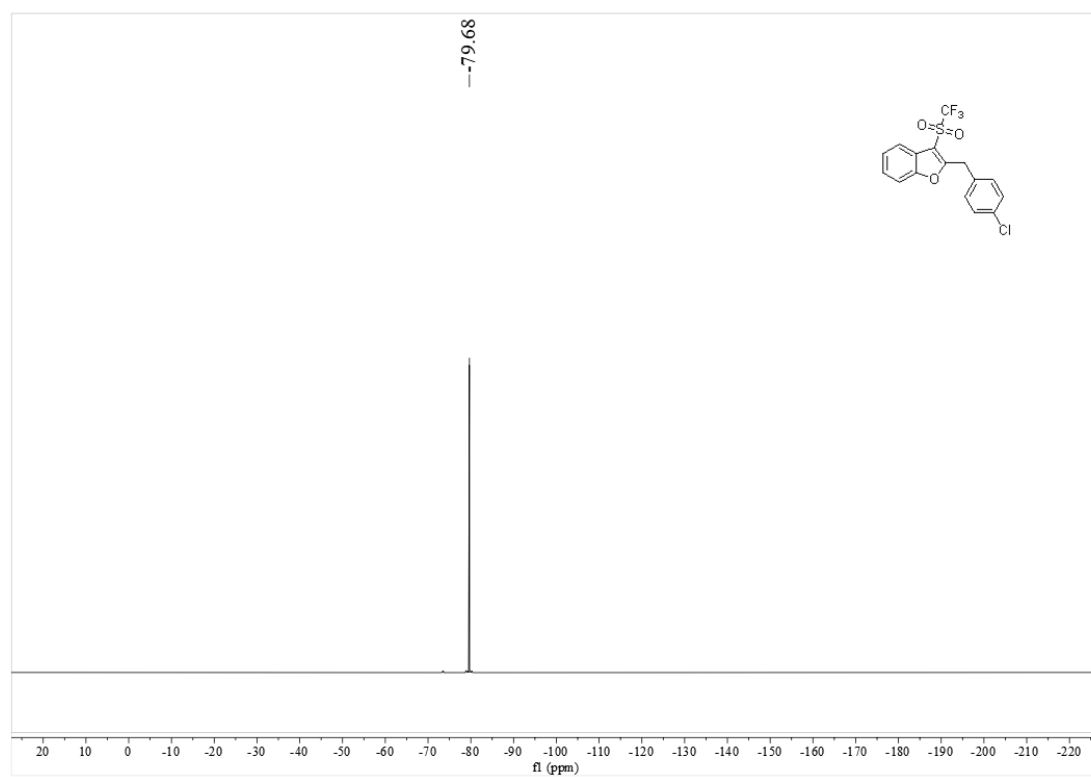

**<sup>1</sup>H NMR (400 MHz, CDCl<sub>3</sub>) spectroscopy of 3o**

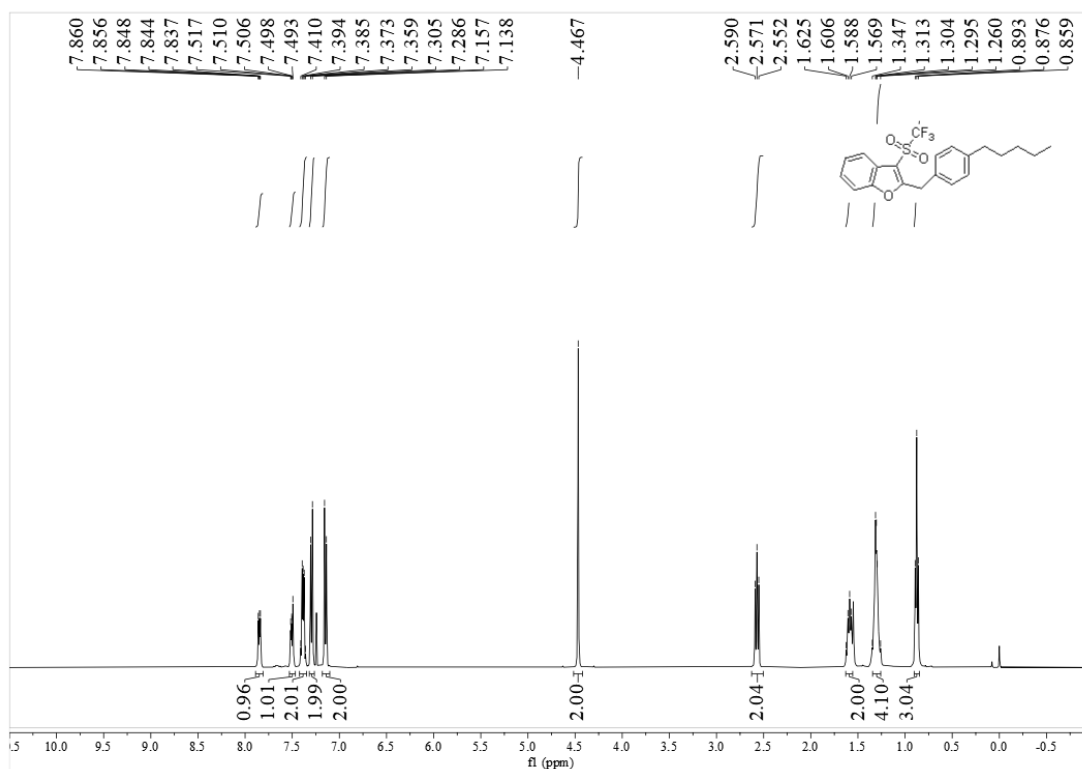

**<sup>13</sup>C NMR (100 MHz, CDCl<sub>3</sub>) spectroscopy of 3o**

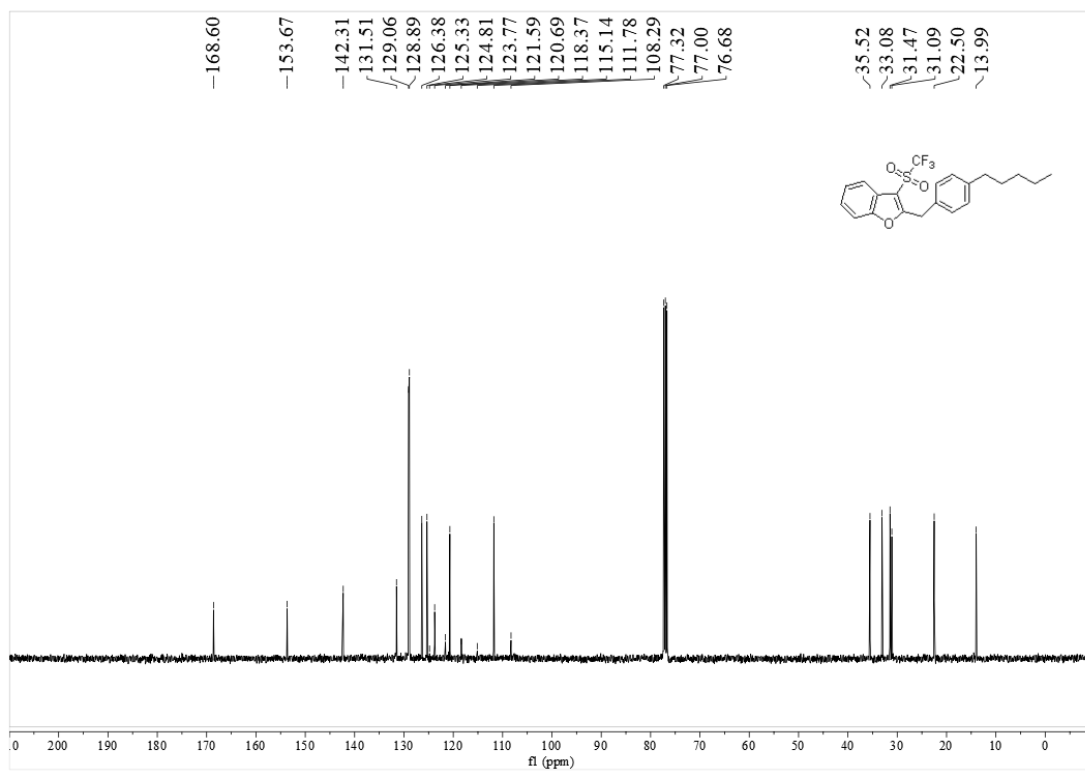

**<sup>19</sup>F NMR (376 MHz, CDCl<sub>3</sub>) spectroscopy of 3o**

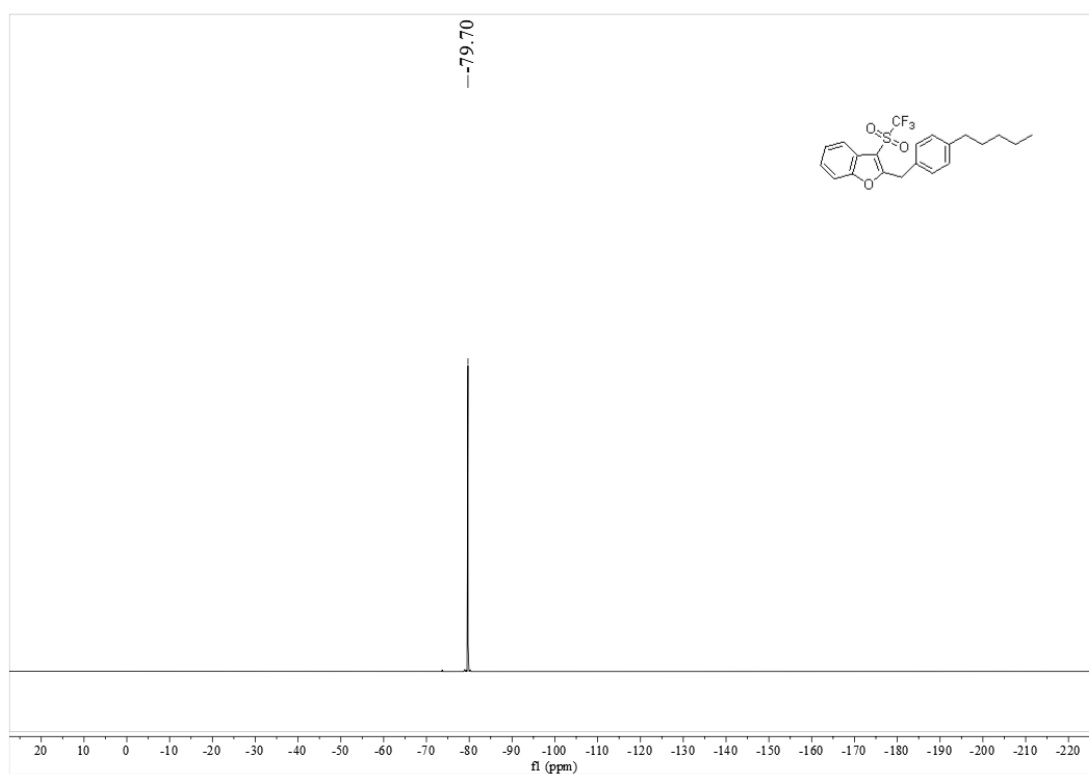

**<sup>1</sup>H NMR (400 MHz, CDCl<sub>3</sub>) spectroscopy of 3p**

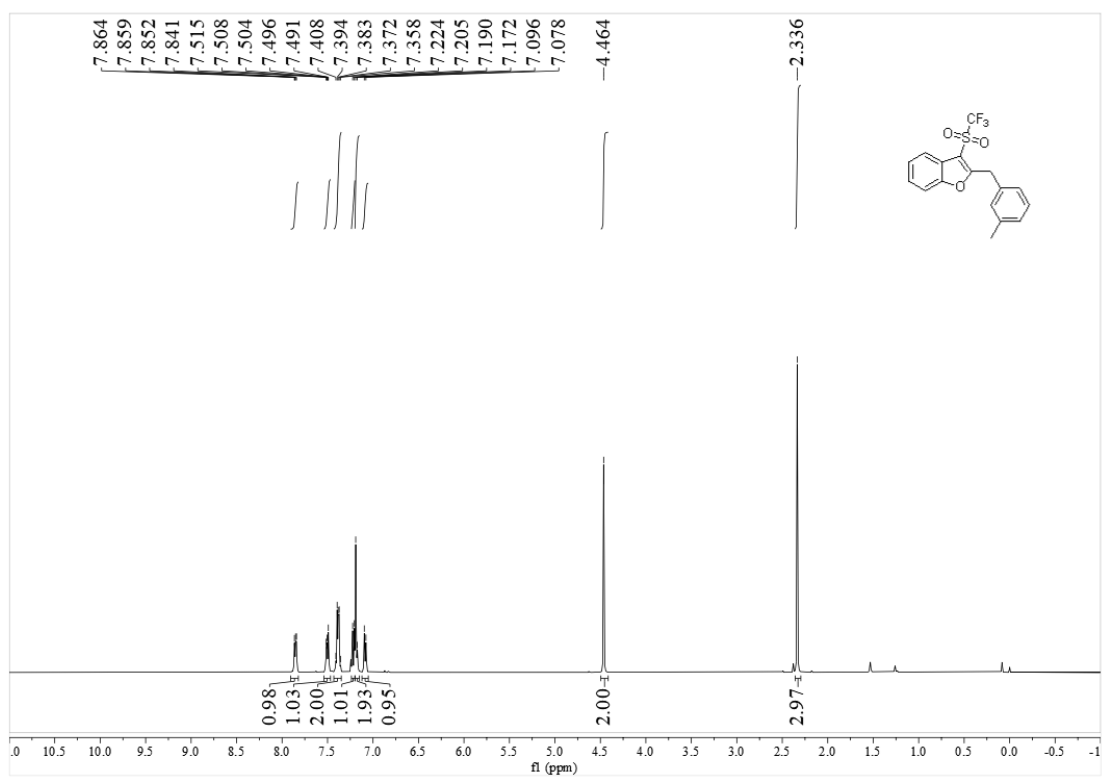

**<sup>13</sup>C NMR (100 MHz, CDCl<sub>3</sub>) spectroscopy of 3p**

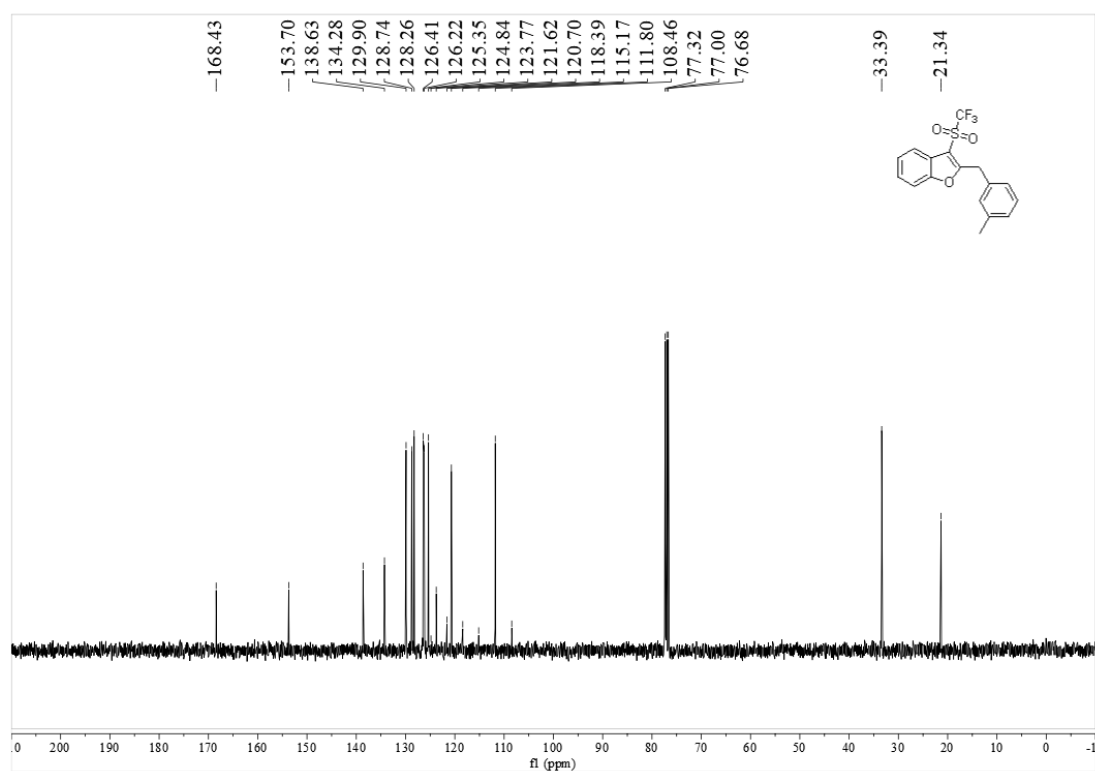

**<sup>19</sup>F NMR (376 MHz, CDCl<sub>3</sub>) spectroscopy of 3p**

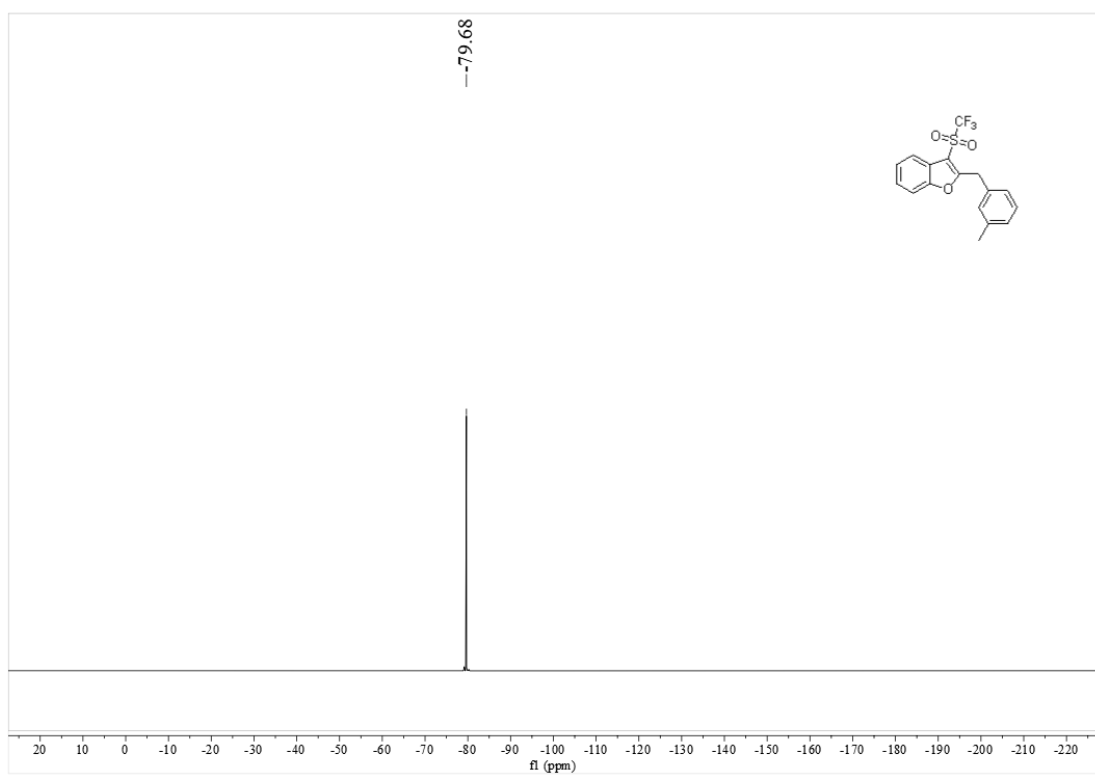

<sup>1</sup>H NMR (400 MHz, CDCl<sub>3</sub>) spectroscopy of **3q**

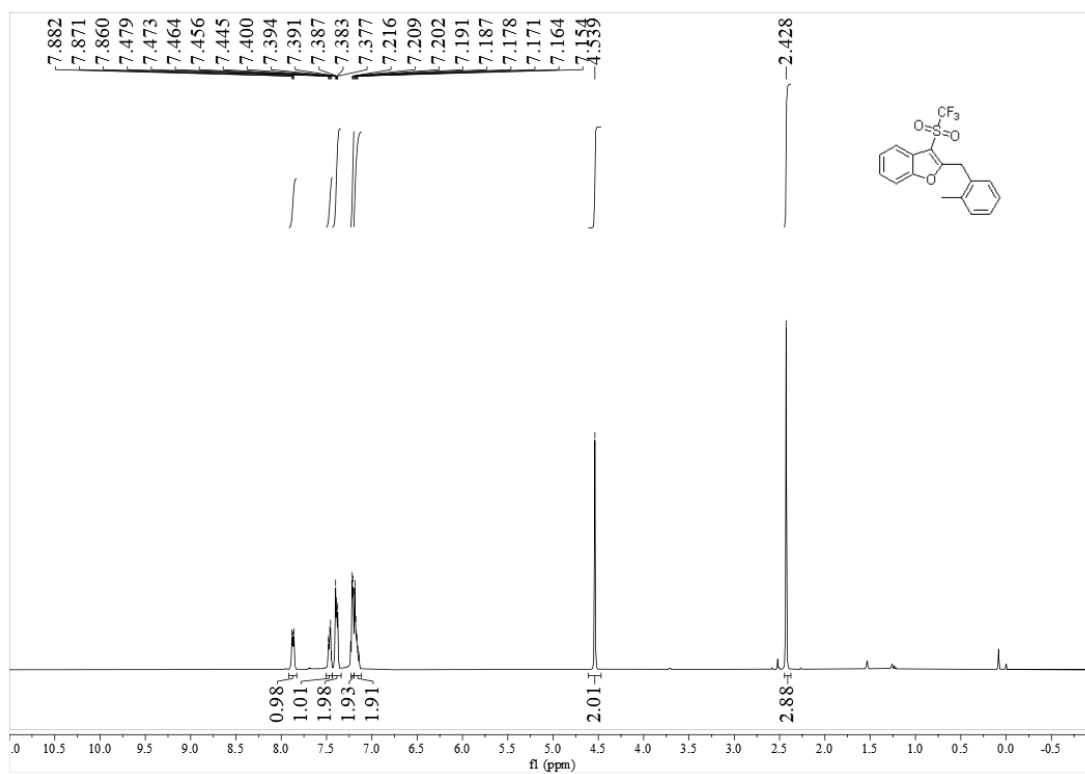

<sup>13</sup>C NMR (100 MHz, CDCl<sub>3</sub>) spectroscopy of **3q**

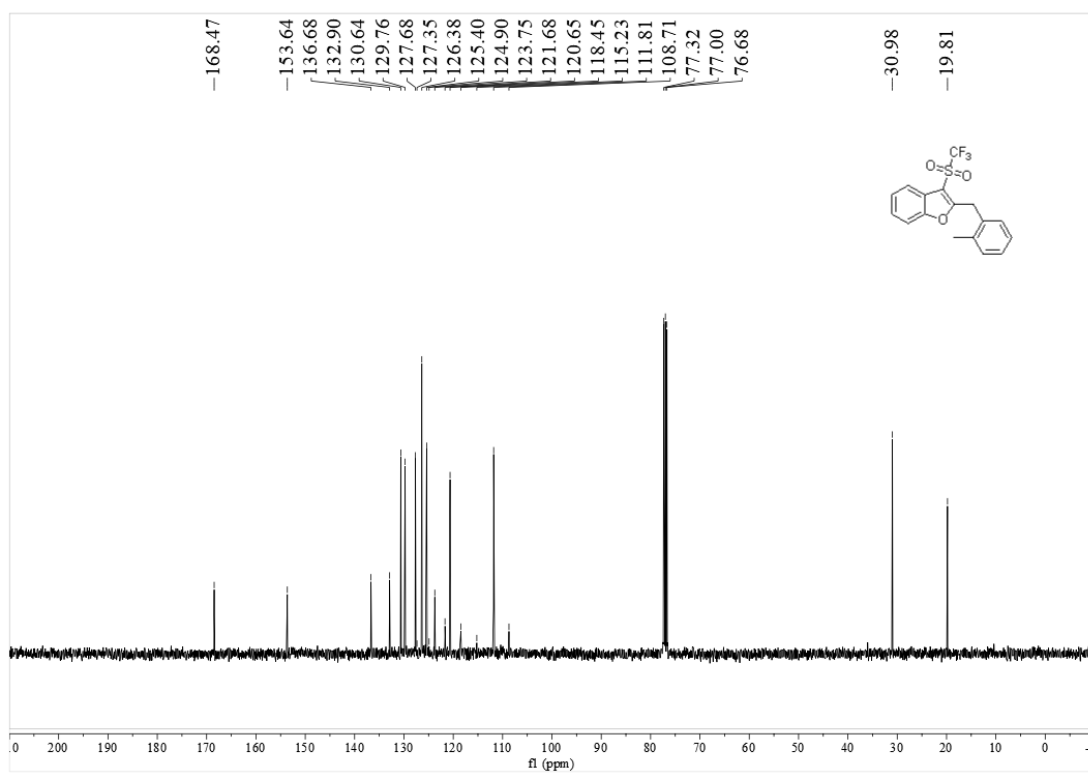



**<sup>19</sup>F NMR (376 MHz, CDCl<sub>3</sub>) spectroscopy of 3q**

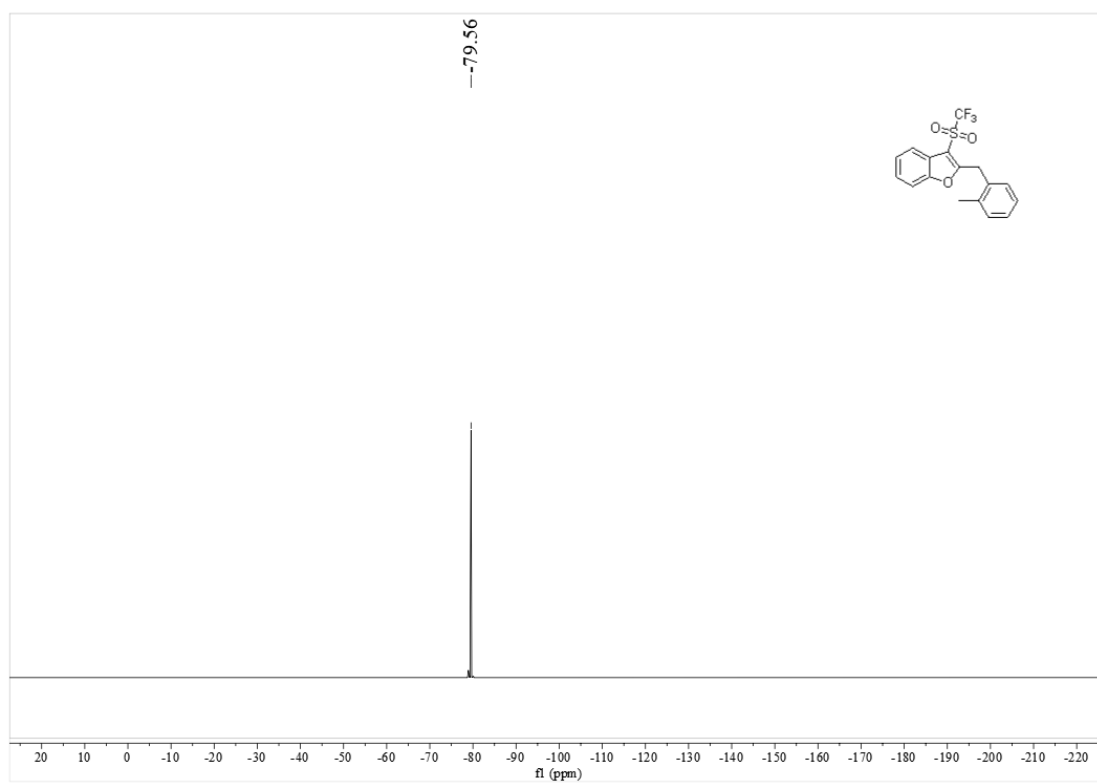

**<sup>1</sup>H NMR (400 MHz, CDCl<sub>3</sub>) spectroscopy of 3r**

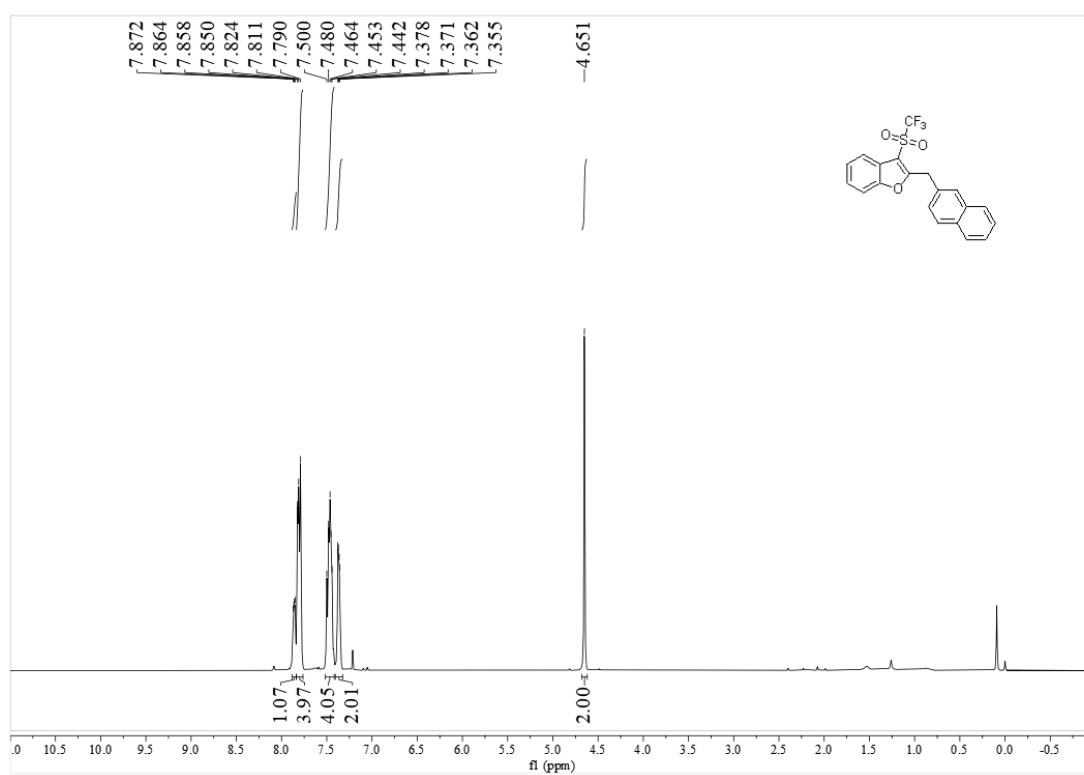

**<sup>13</sup>C NMR (100 MHz, CDCl<sub>3</sub>) spectroscopy of 3r**

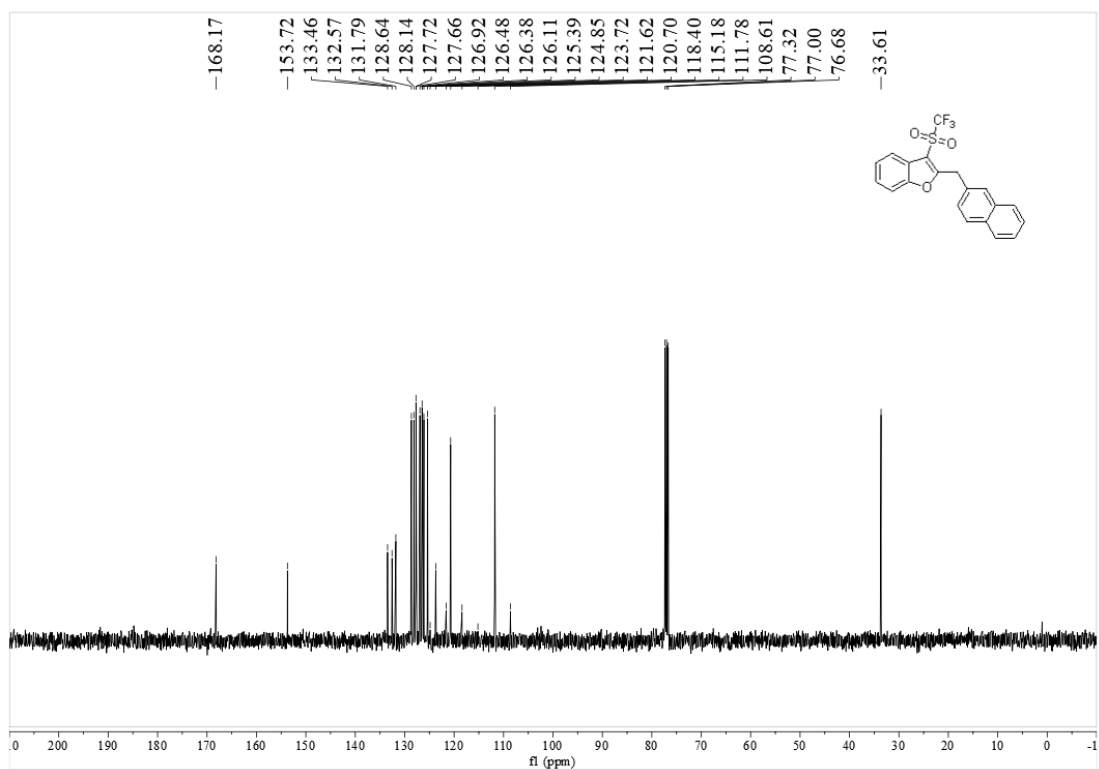

**<sup>19</sup>F NMR (376 MHz, CDCl<sub>3</sub>) spectroscopy of 3r**

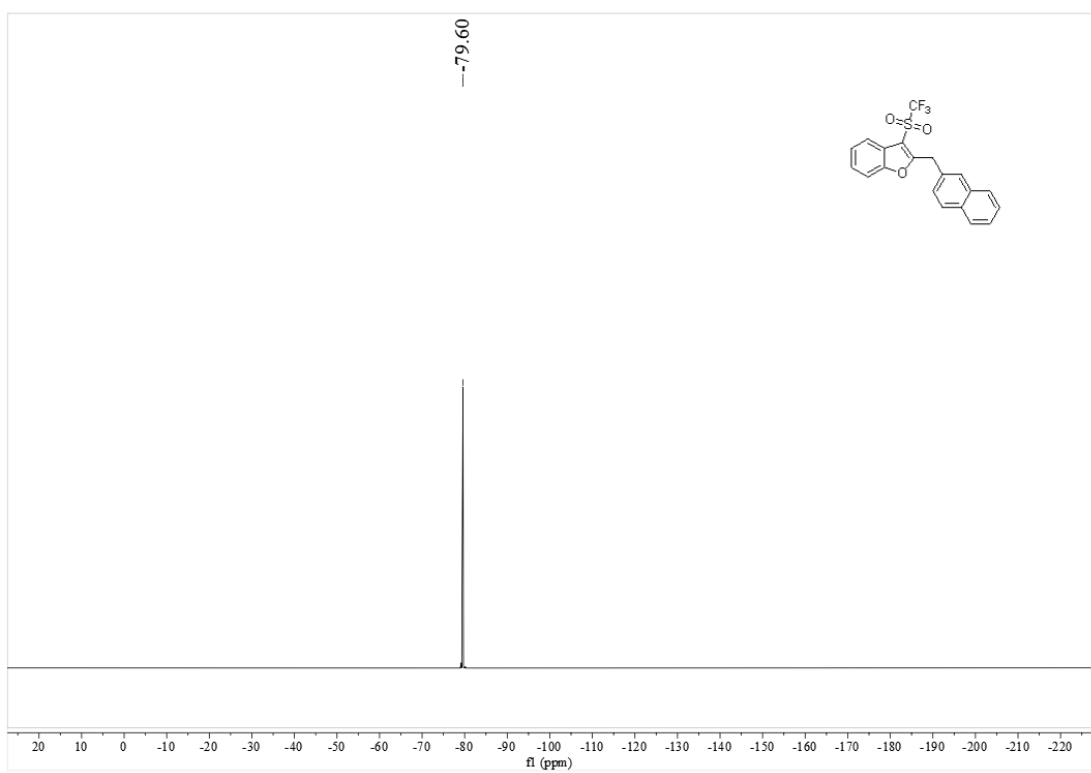

**<sup>1</sup>H NMR (400 MHz, CDCl<sub>3</sub>) spectroscopy of 3s**

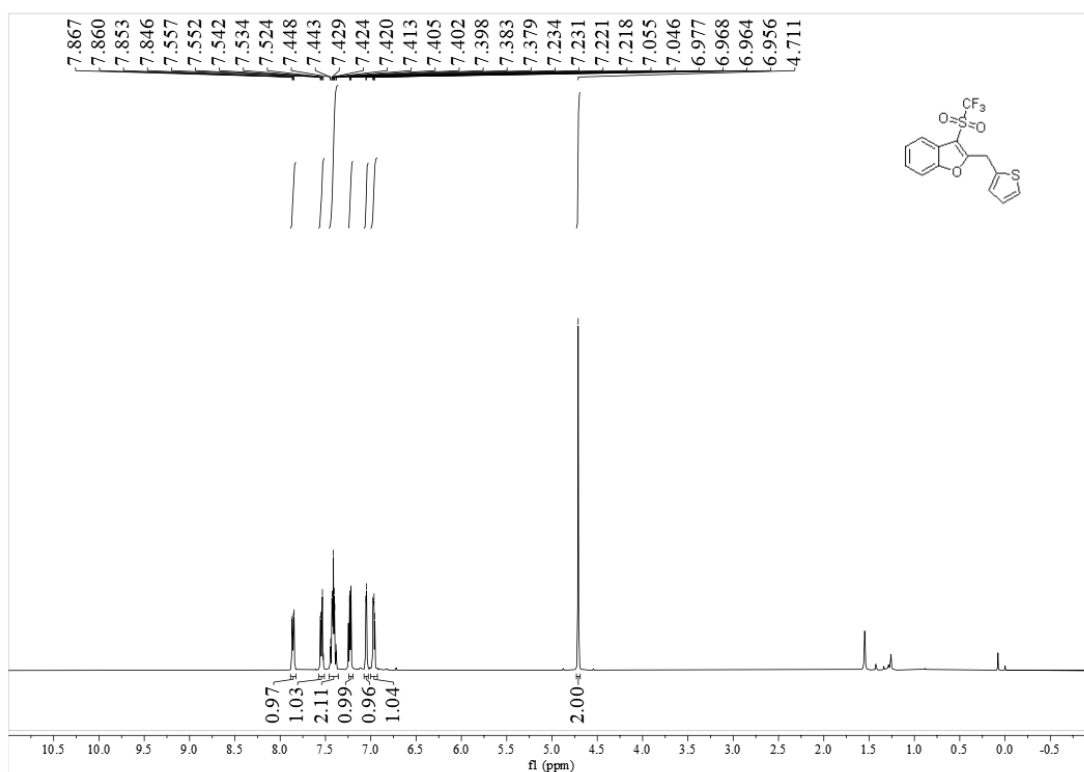

**<sup>13</sup>C NMR (100 MHz, CDCl<sub>3</sub>) spectroscopy of 3s**

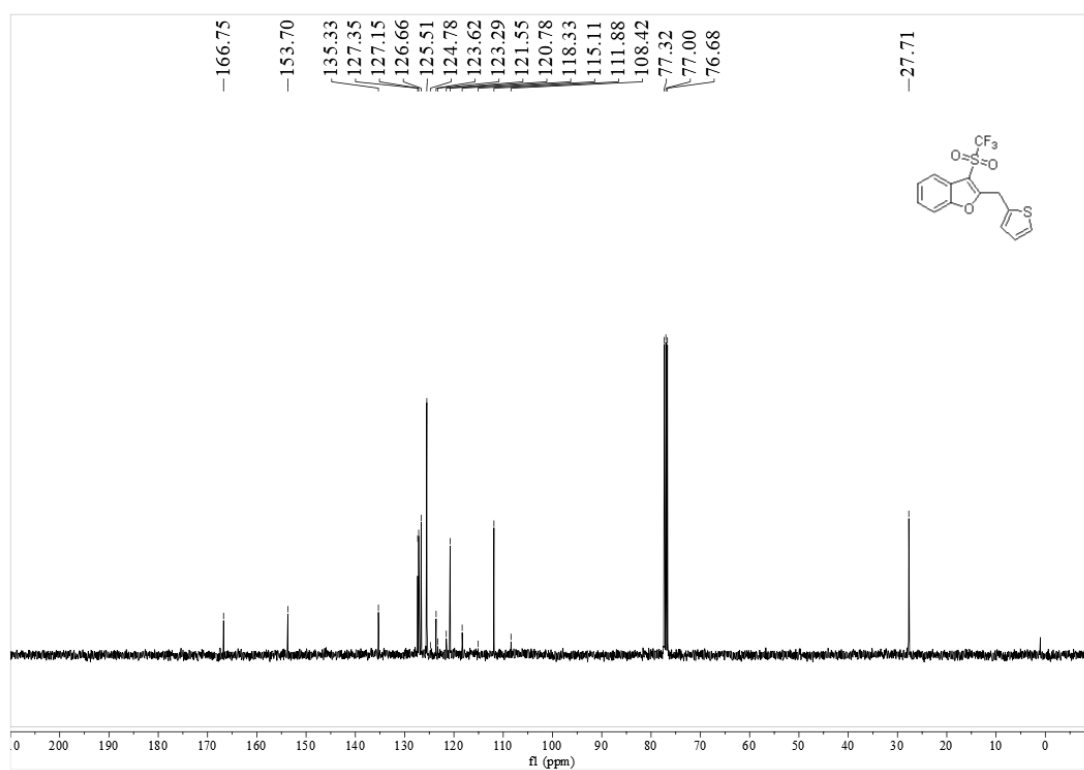

**<sup>19</sup>F NMR (376 MHz, CDCl<sub>3</sub>) spectroscopy of 3s**

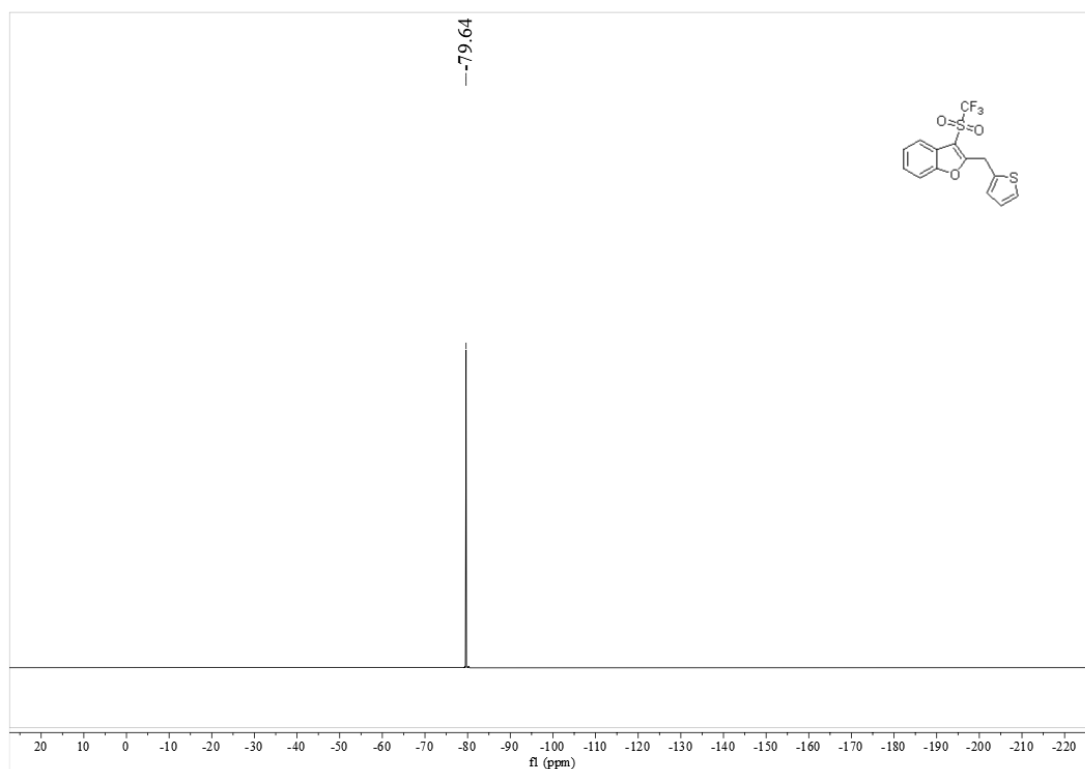

**<sup>1</sup>H NMR (400 MHz, CDCl<sub>3</sub>) spectroscopy of 3t**

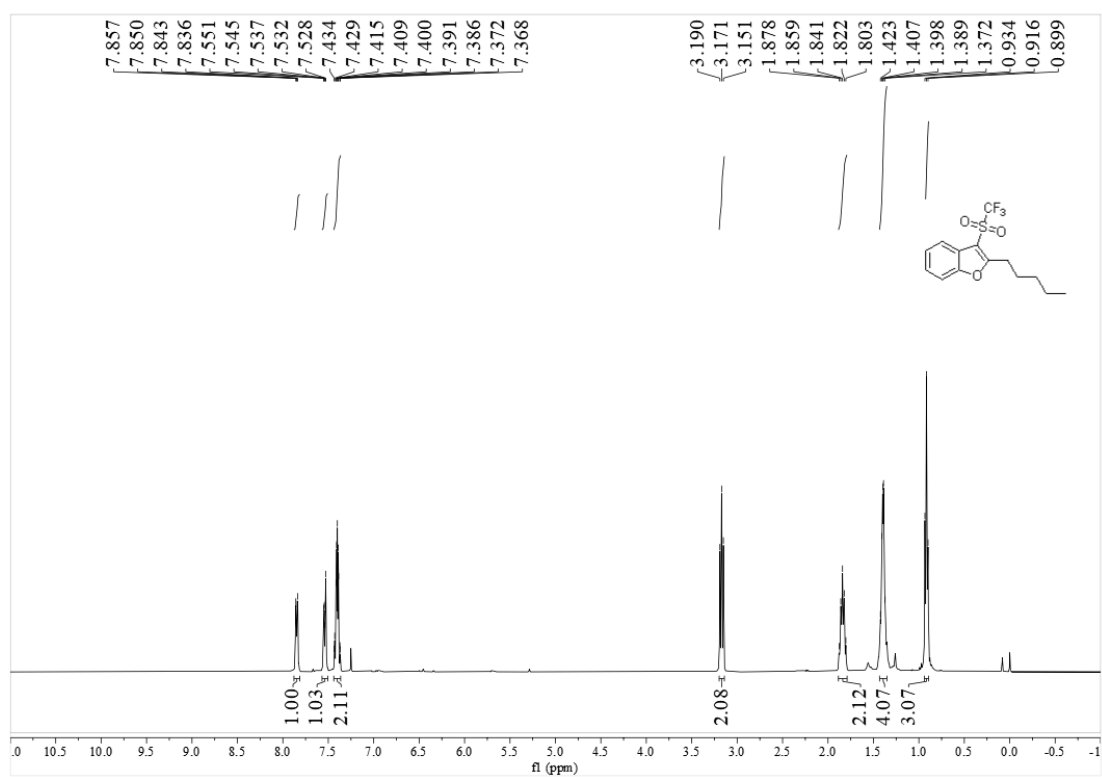

<sup>13</sup>C NMR (100 MHz, CDCl<sub>3</sub>) spectroscopy of **3t**

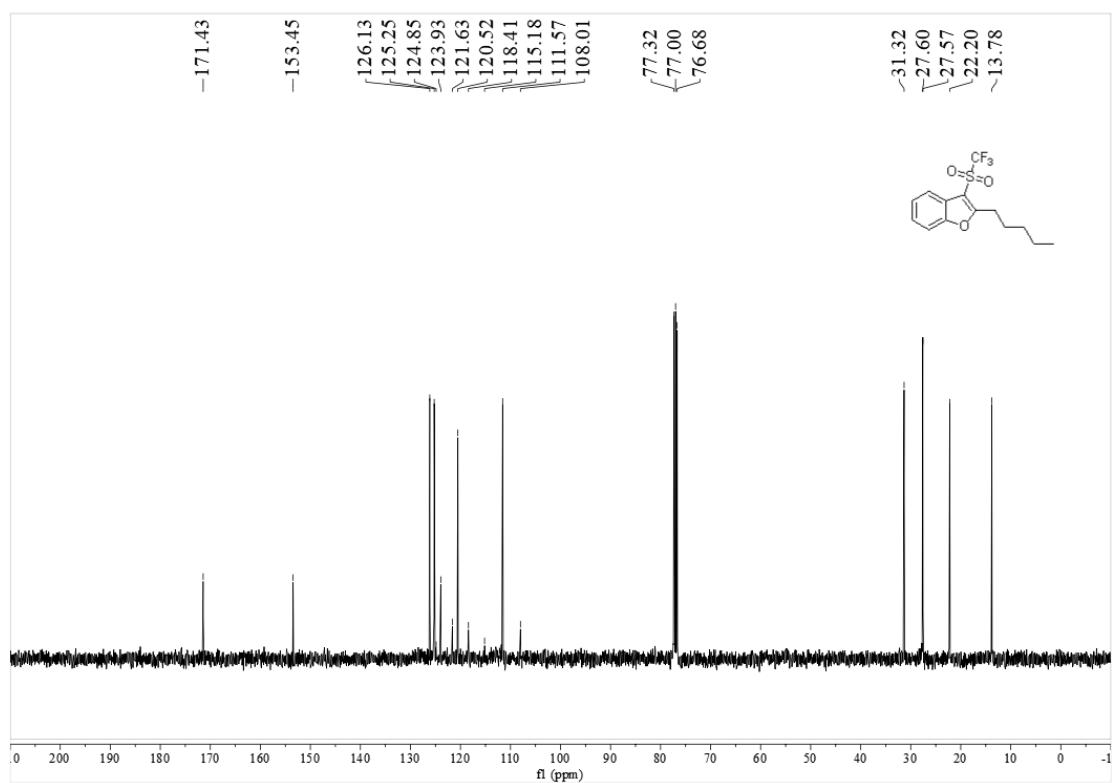

<sup>19</sup>F NMR (376 MHz, CDCl<sub>3</sub>) spectroscopy of **3t**

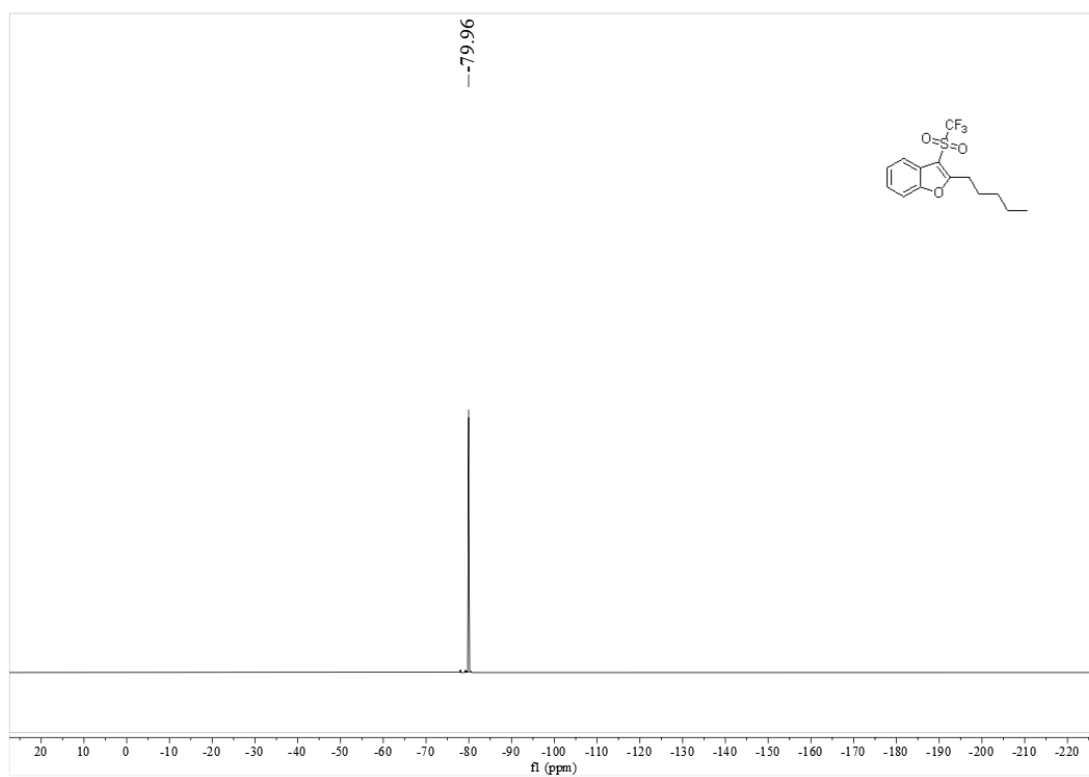

**<sup>1</sup>H NMR (400 MHz, CDCl<sub>3</sub>) spectroscopy of 3u**

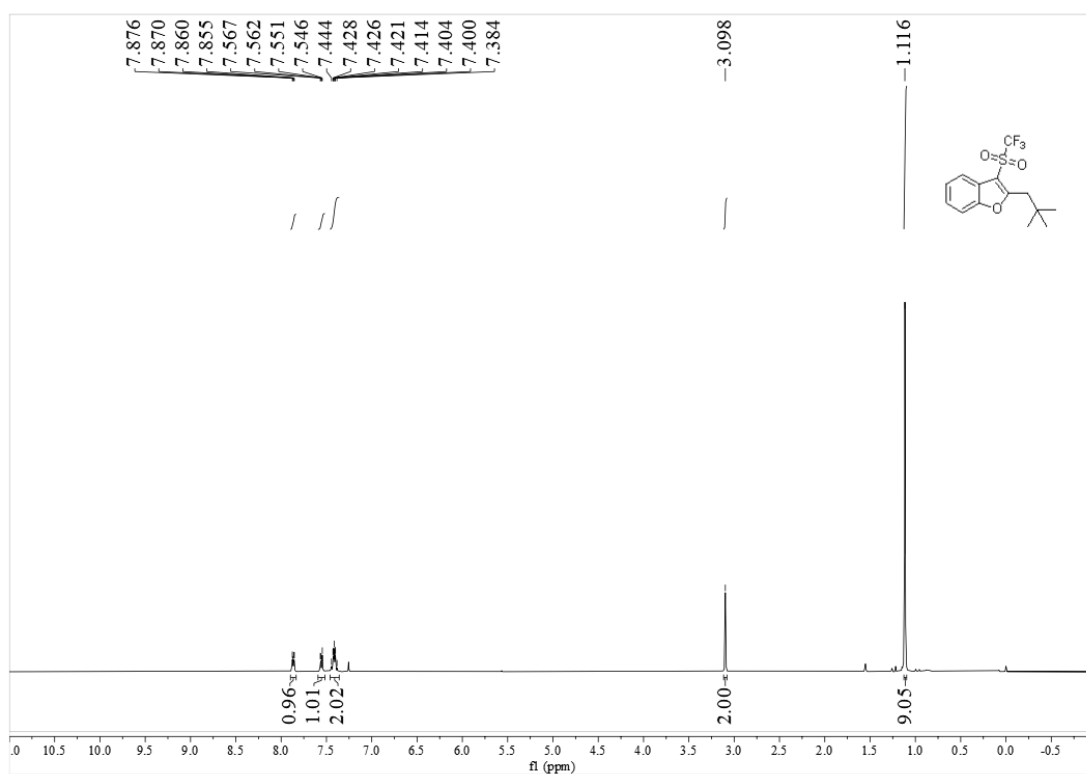

**<sup>13</sup>C NMR (100 MHz, CDCl<sub>3</sub>) spectroscopy of 3u**

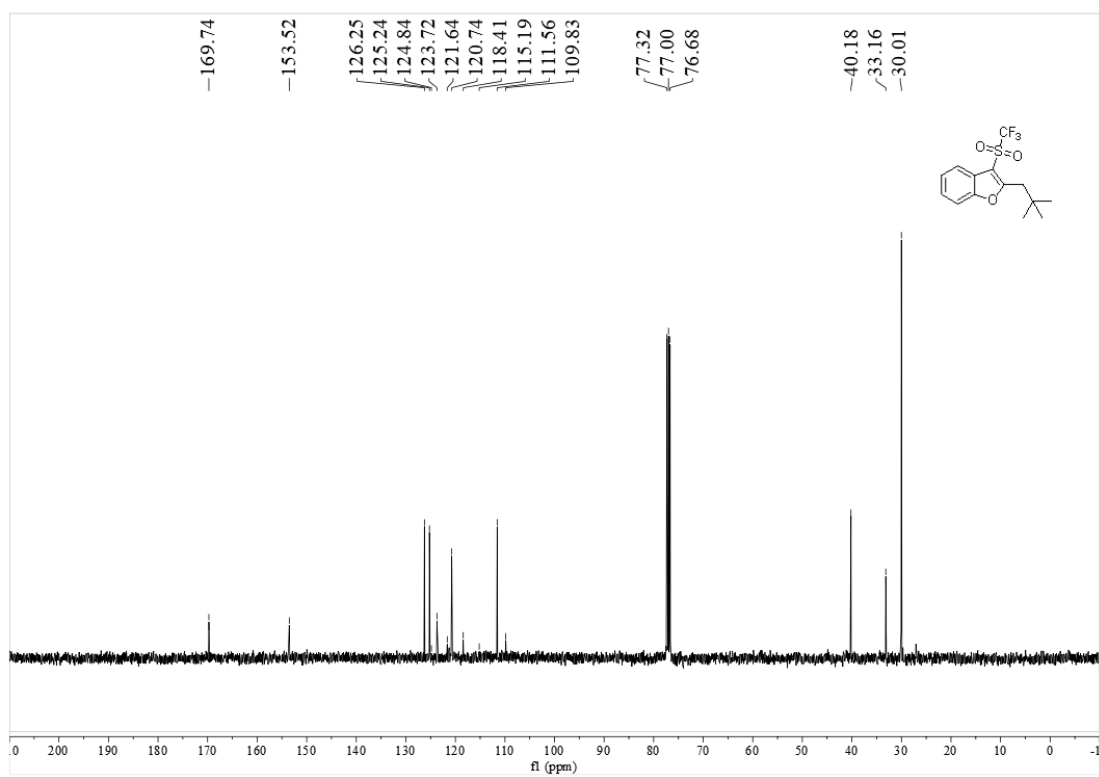

**$^{19}\text{F}$  NMR (376 MHz,  $\text{CDCl}_3$ ) spectroscopy of **3u****

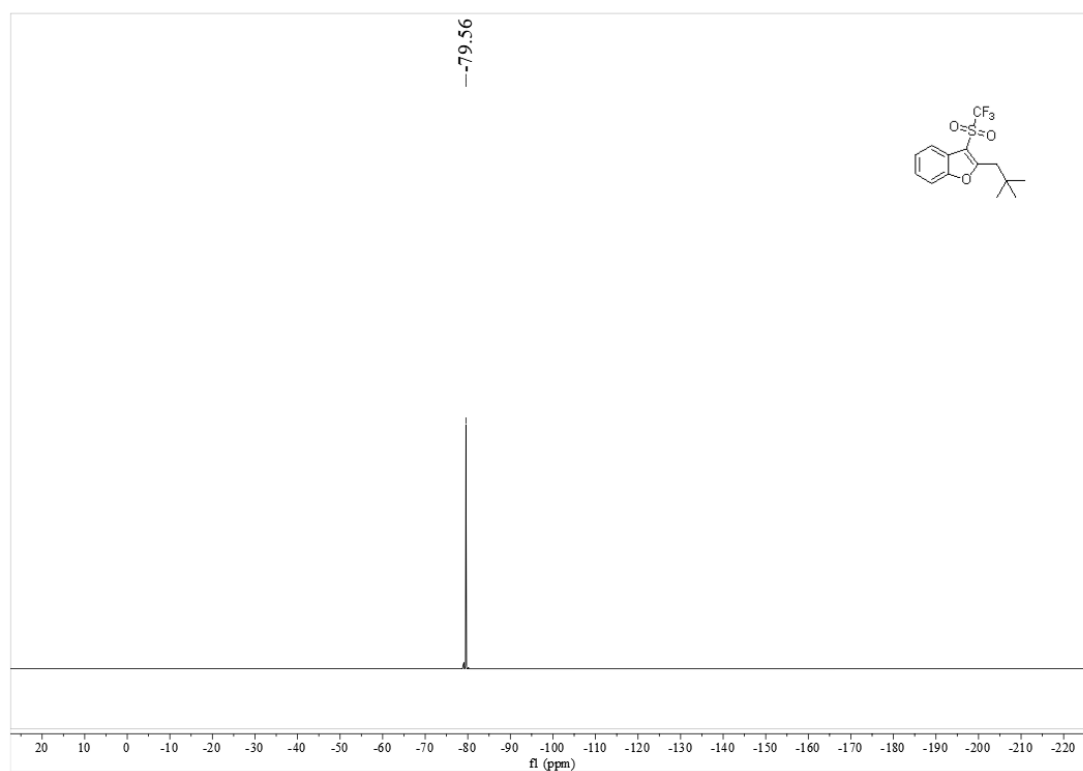

**$^1\text{H}$  NMR (400 MHz,  $\text{CDCl}_3$ ) spectroscopy of **3v****

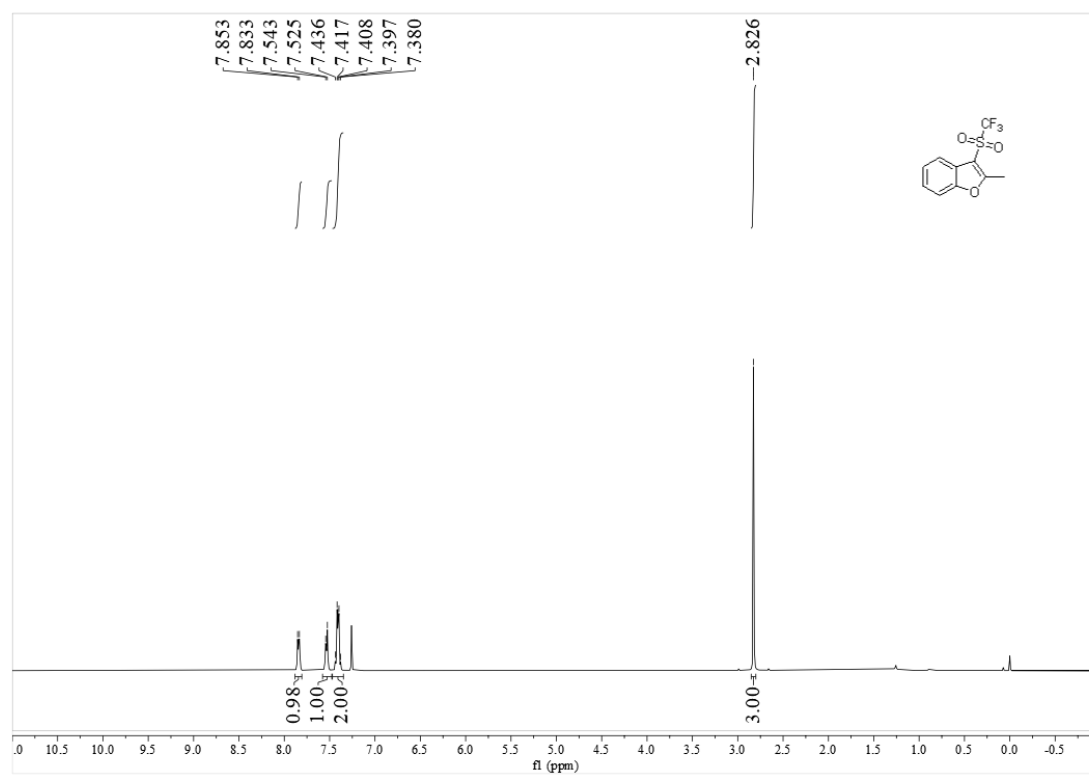

<sup>13</sup>C NMR (100 MHz, CDCl<sub>3</sub>) spectroscopy of **3v**

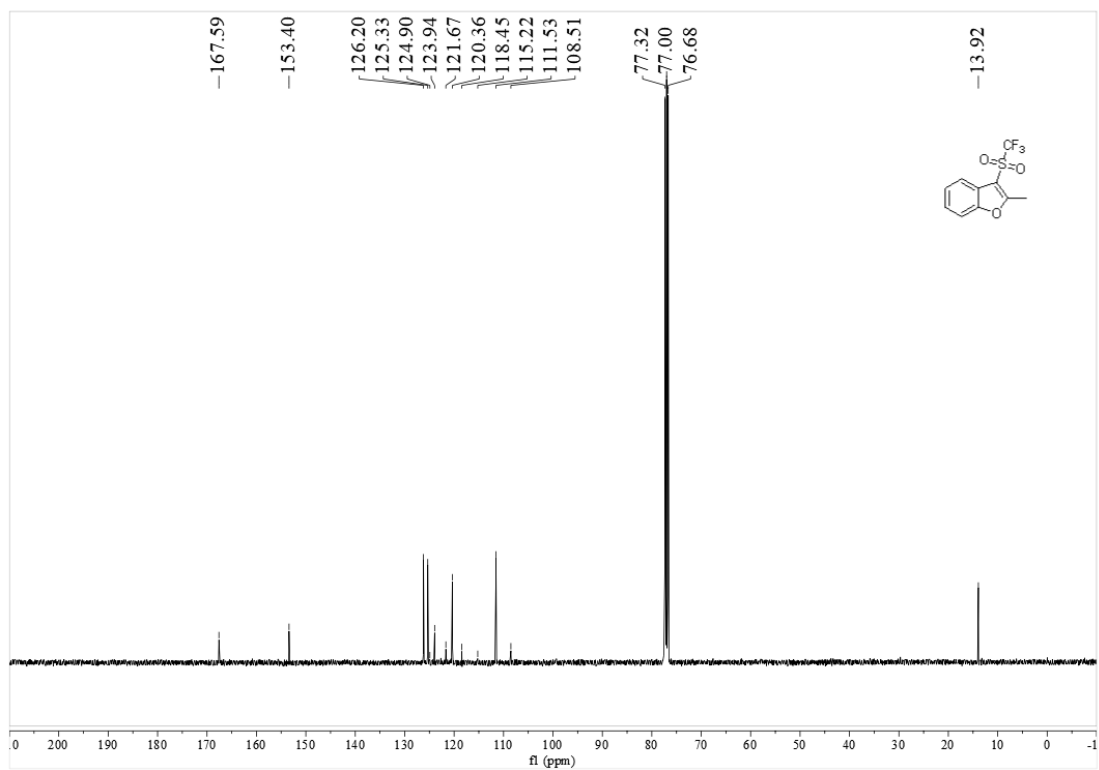

<sup>19</sup>F NMR (376 MHz, CDCl<sub>3</sub>) spectroscopy of **3v**

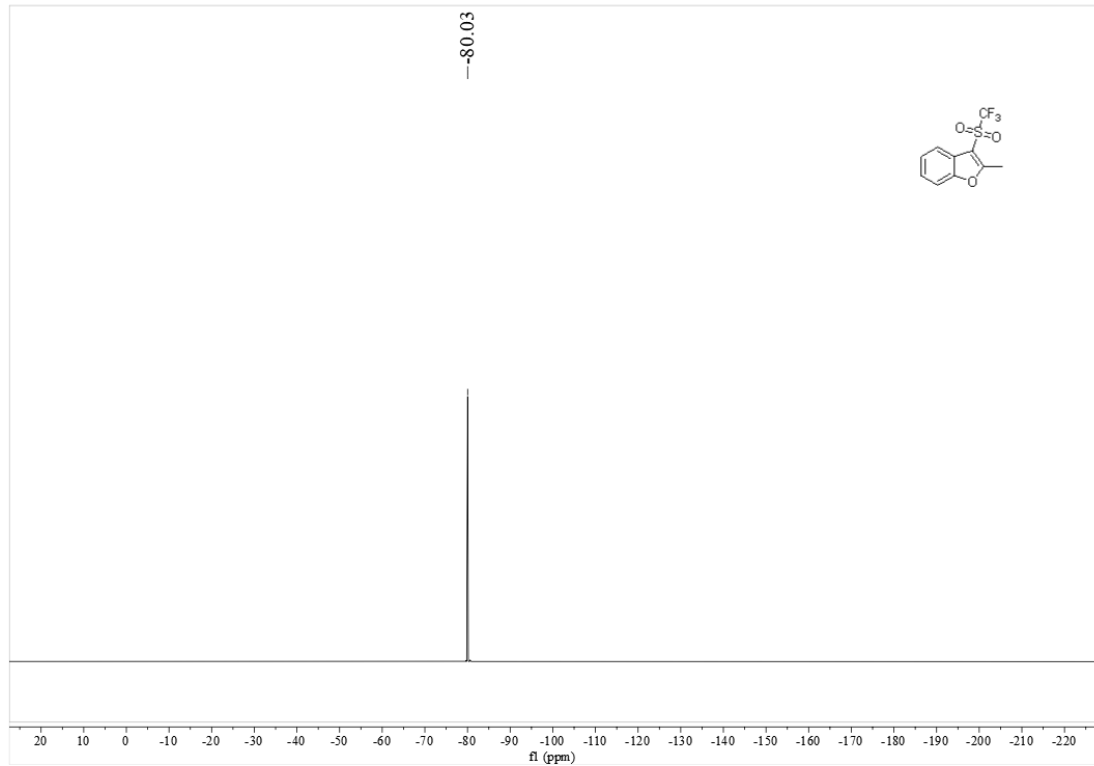



<sup>1</sup>H NMR (400 MHz, CDCl<sub>3</sub>) spectroscopy of **3w**

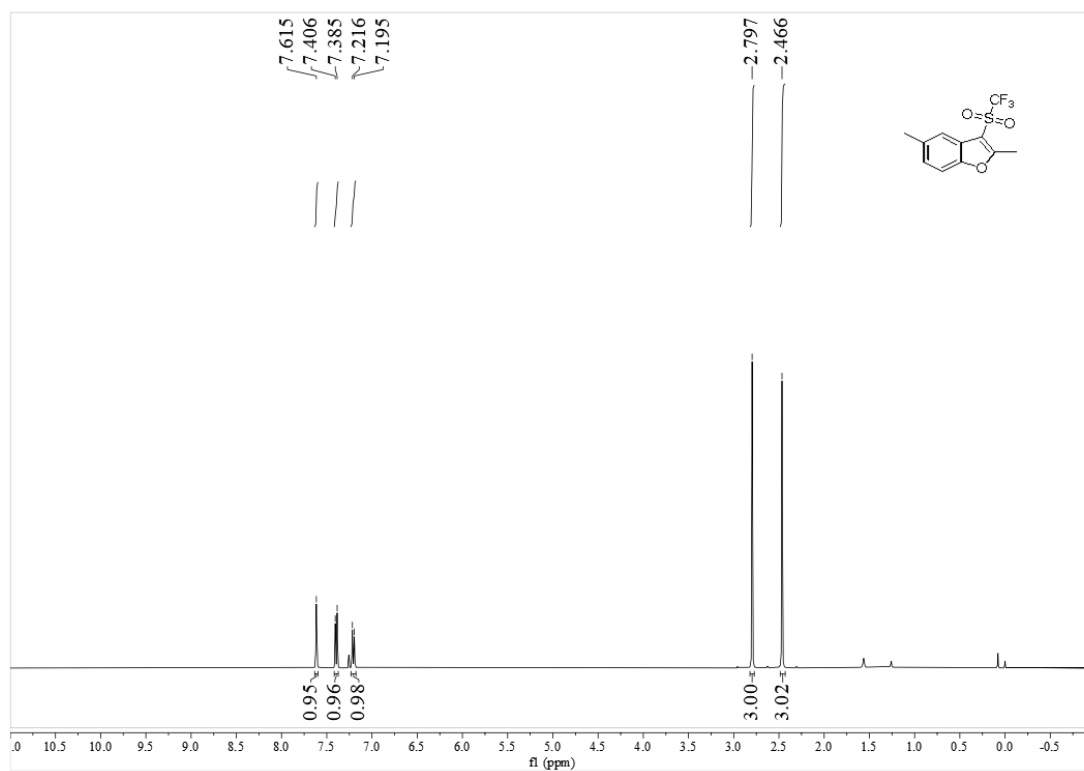

<sup>13</sup>C NMR (100 MHz, CDCl<sub>3</sub>) spectroscopy of **3w**

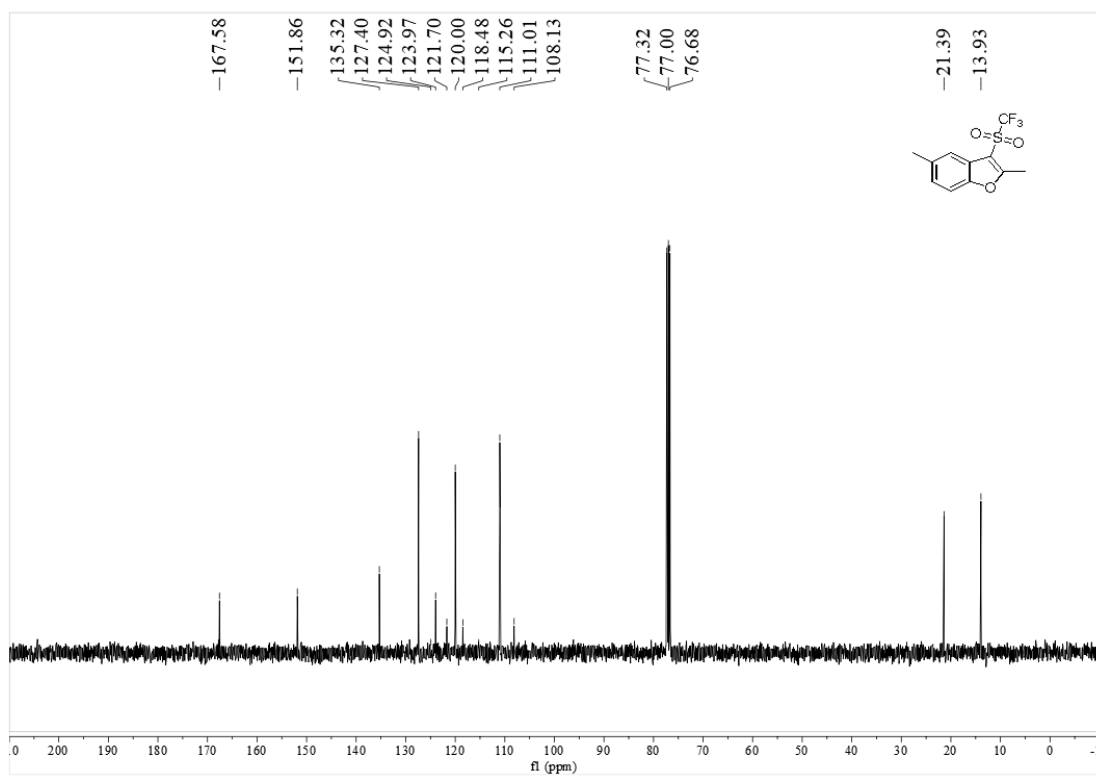

<sup>19</sup>F NMR (376 MHz, CDCl<sub>3</sub>) spectroscopy of **3w**

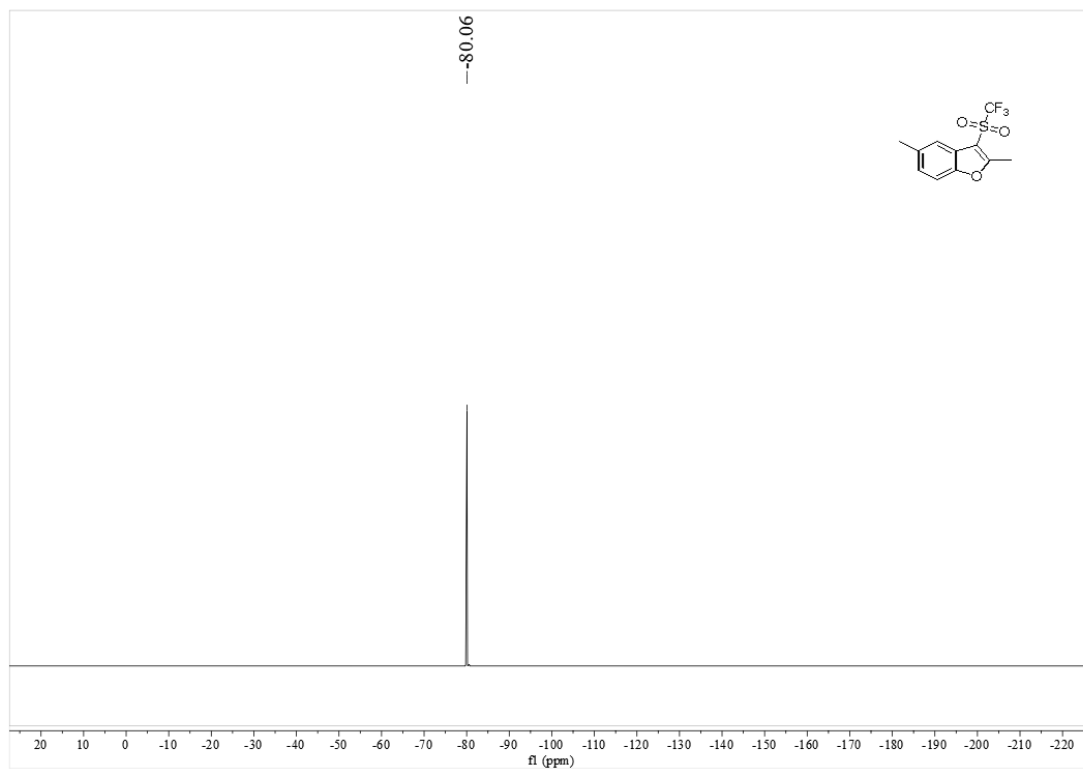

<sup>1</sup>H NMR (400 MHz, CDCl<sub>3</sub>) spectroscopy of **3x**

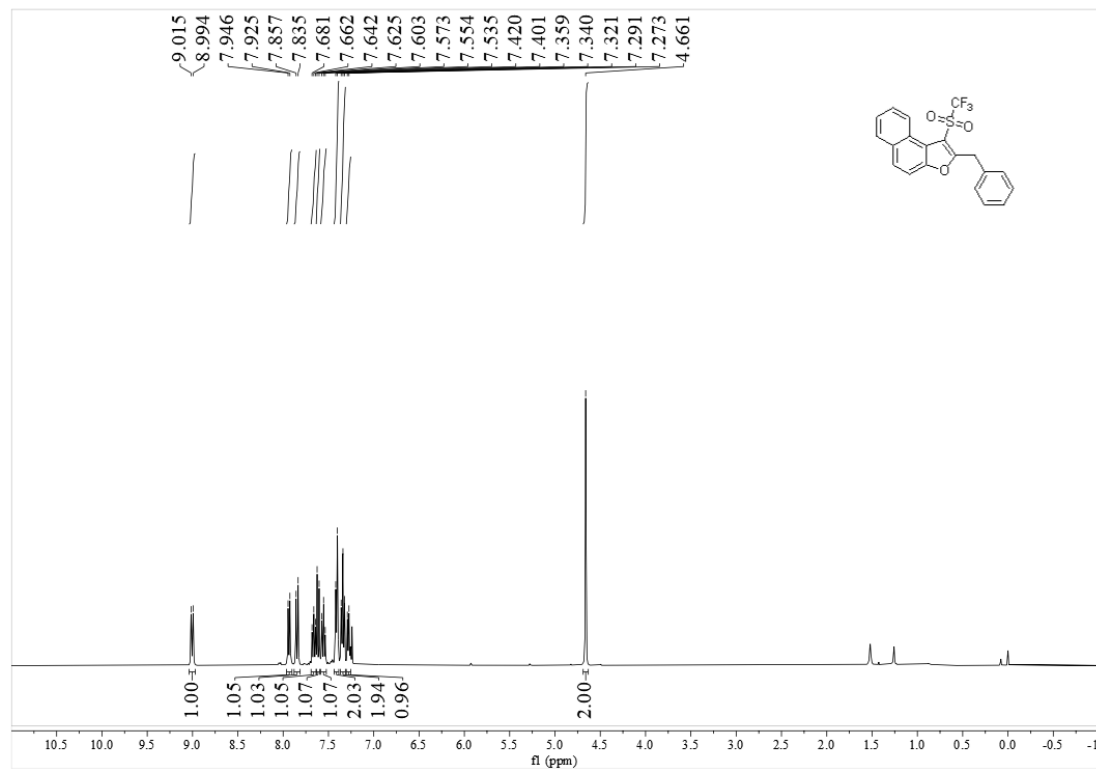

<sup>13</sup>C NMR (100 MHz, CDCl<sub>3</sub>) spectroscopy of **3x**

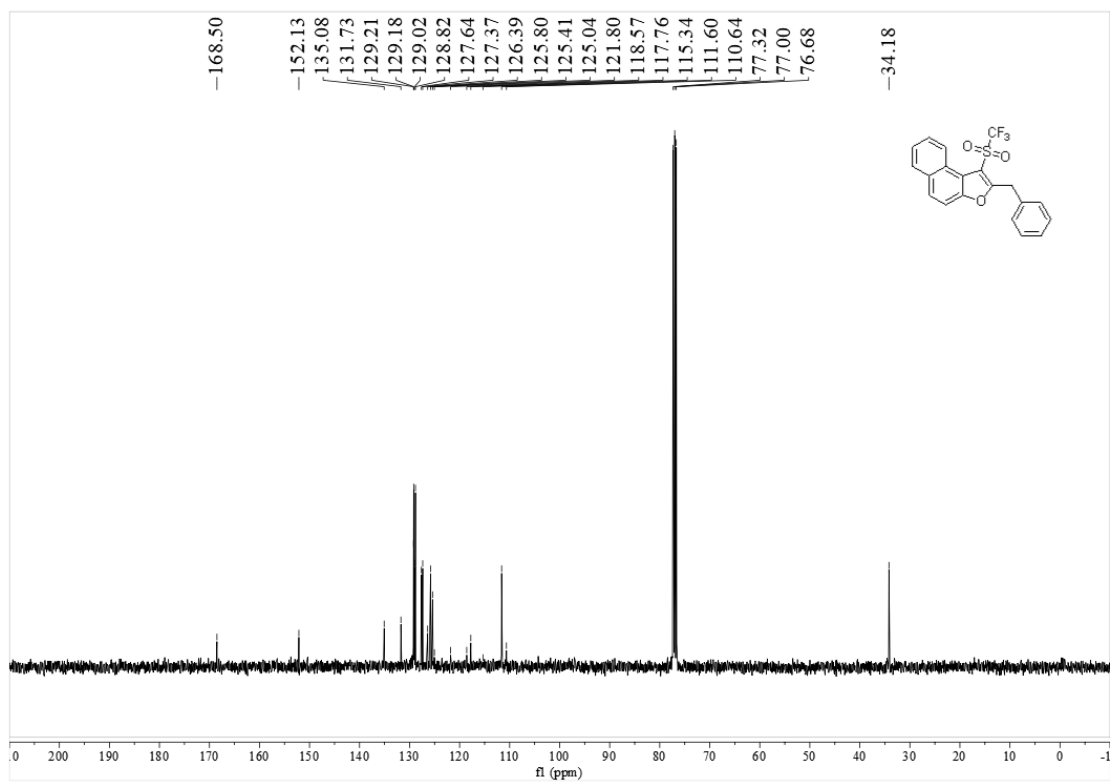

<sup>19</sup>F NMR (376 MHz, CDCl<sub>3</sub>) spectroscopy of **3x**

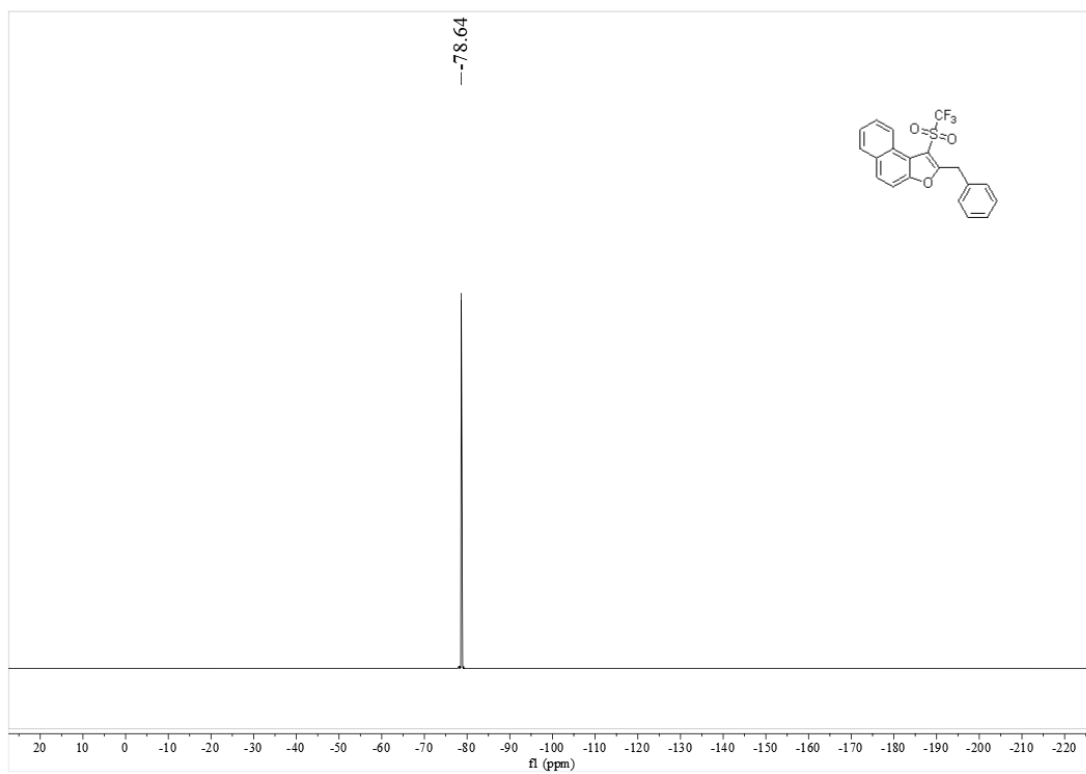

<sup>1</sup>H NMR (400 MHz, CDCl<sub>3</sub>) spectroscopy of **3y**

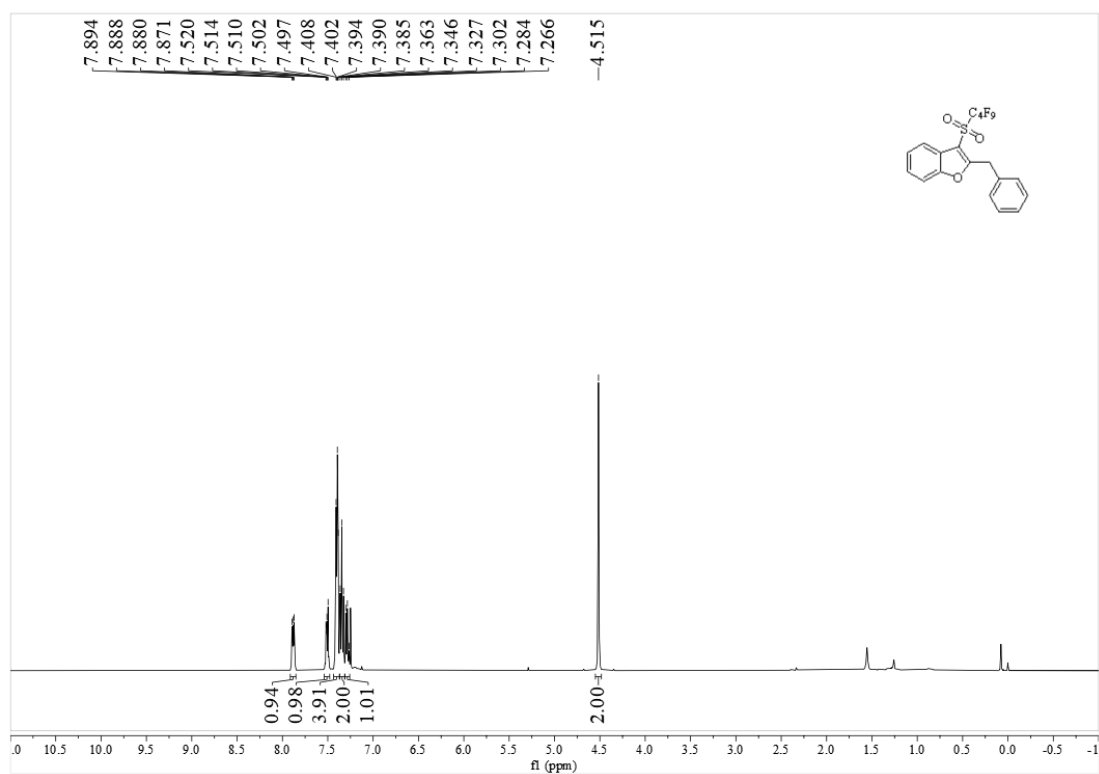

<sup>13</sup>C NMR (100 MHz, CDCl<sub>3</sub>) spectroscopy of **3y**

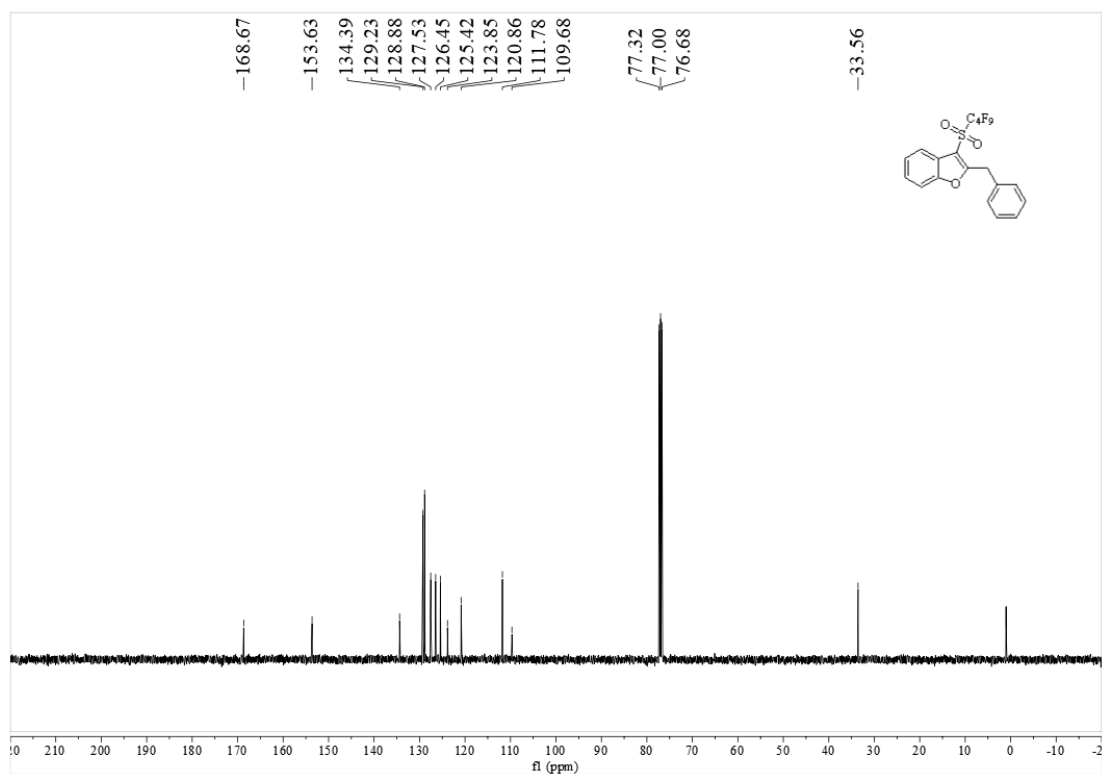

**<sup>19</sup>F NMR (376 MHz, CDCl<sub>3</sub>) spectroscopy of 3y**

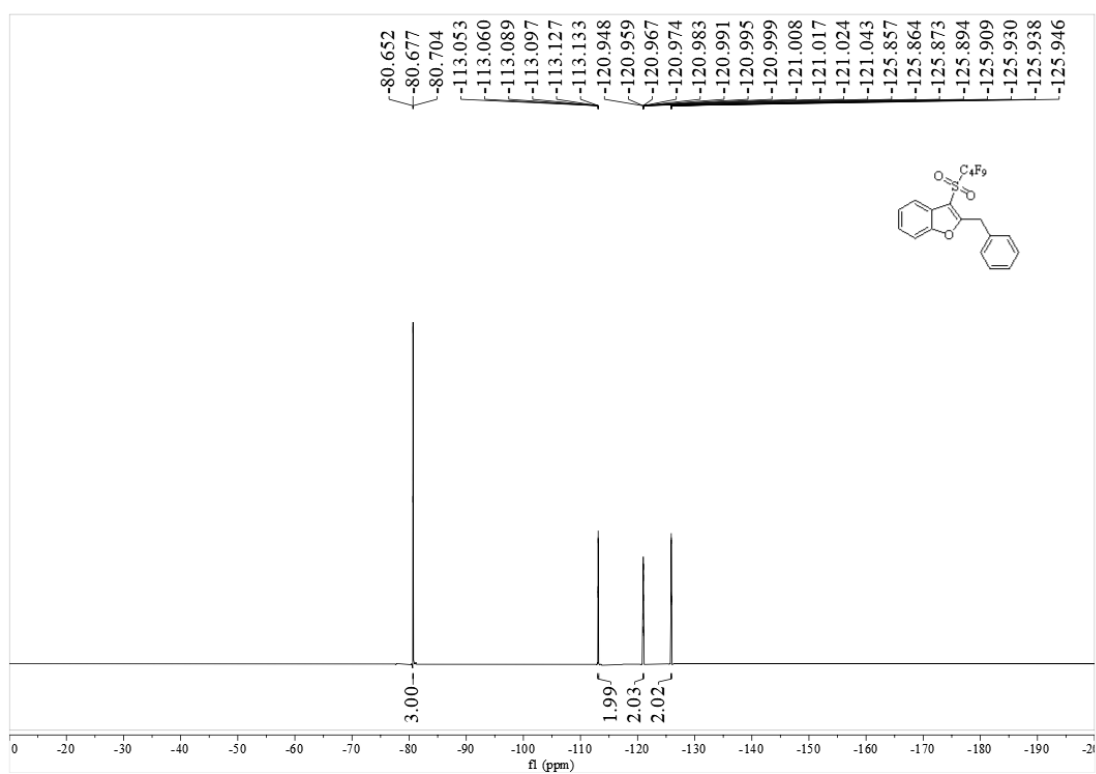

**<sup>1</sup>H NMR (400 MHz, CDCl<sub>3</sub>) spectroscopy of 3z**

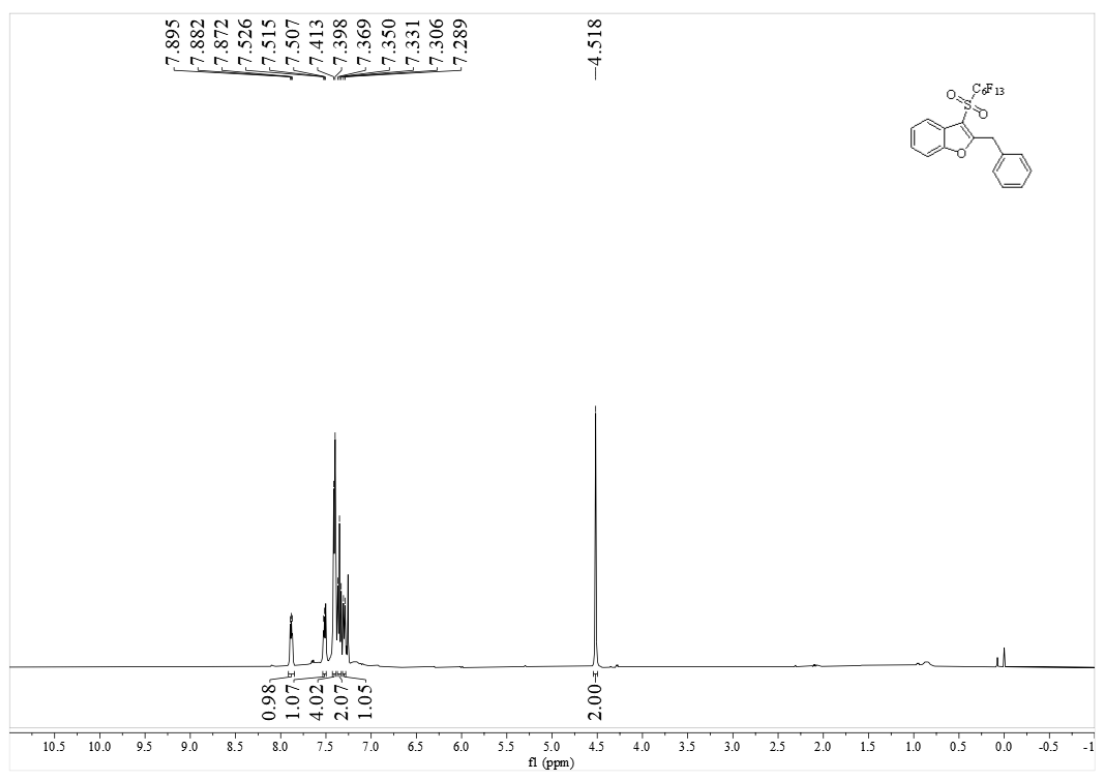

<sup>13</sup>C NMR (100 MHz, CDCl<sub>3</sub>) spectroscopy of **3z**

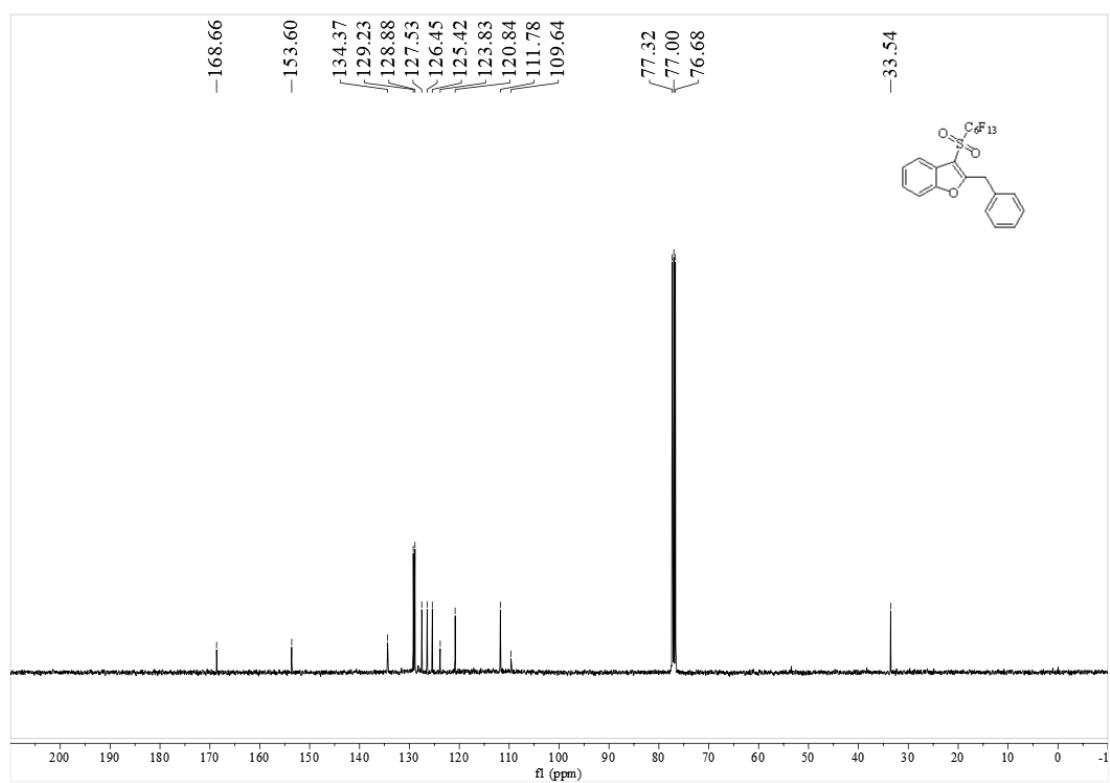

<sup>19</sup>F NMR (376 MHz, CDCl<sub>3</sub>) spectroscopy of **3z**

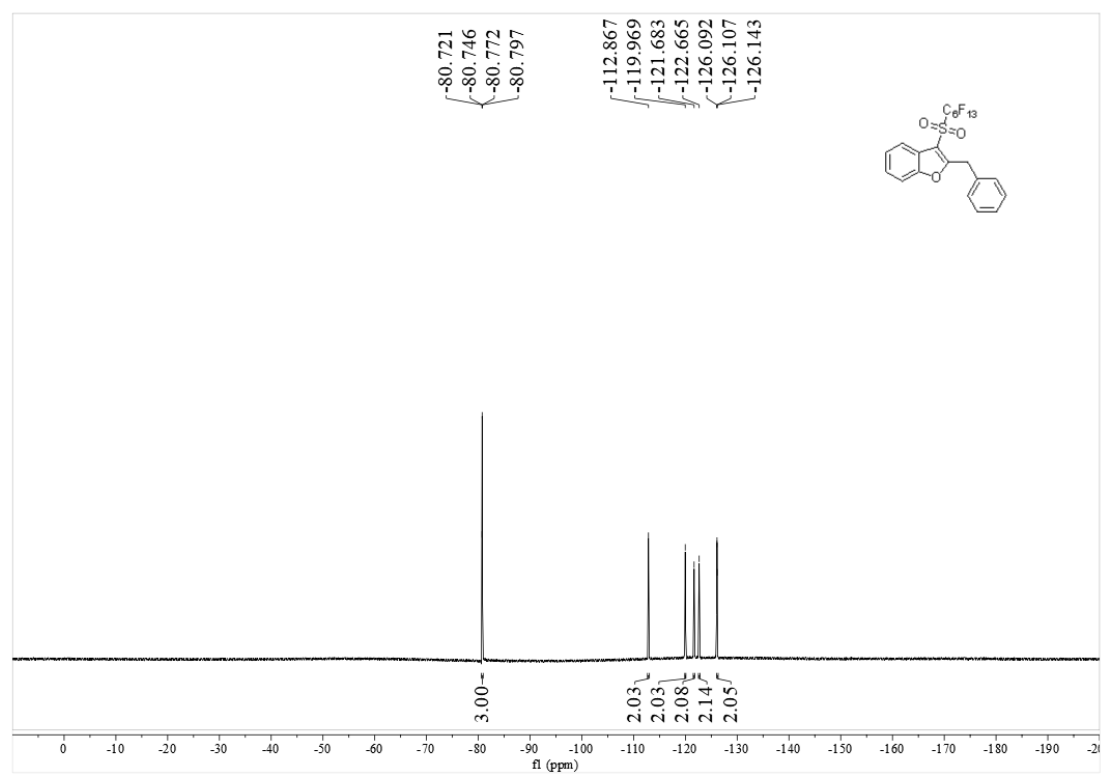

**<sup>1</sup>H NMR (400 MHz, CDCl<sub>3</sub>) spectroscopy of 3aa**

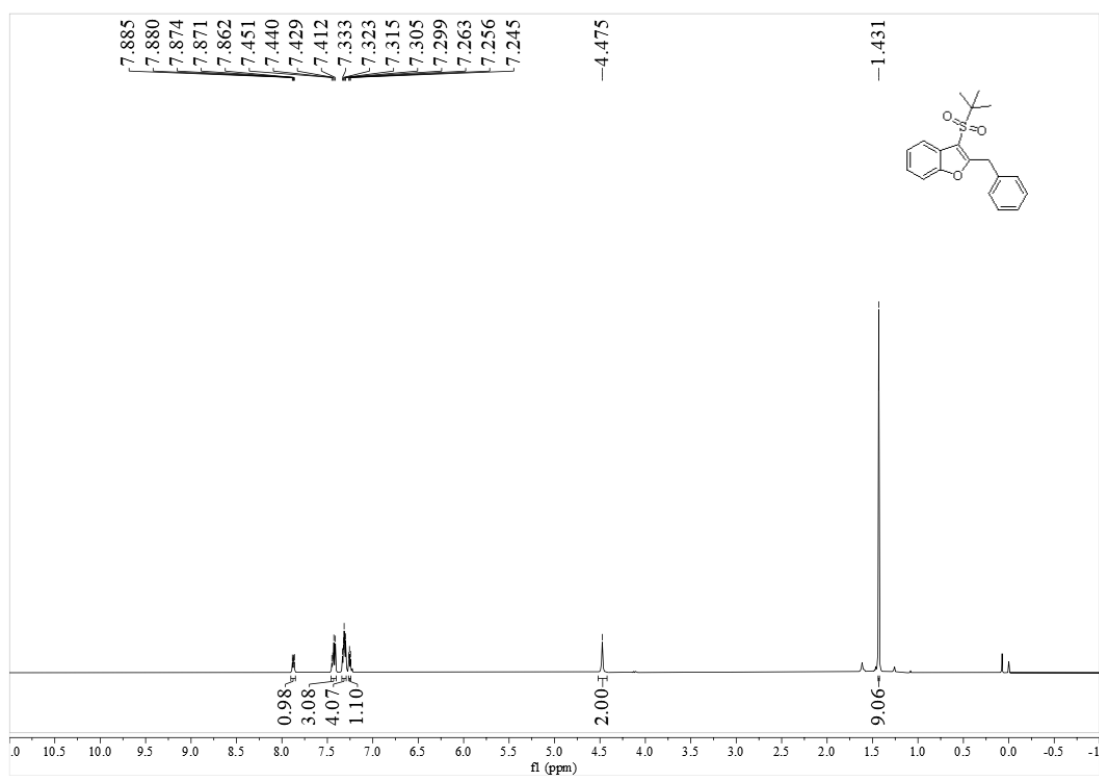

**<sup>13</sup>C NMR (100 MHz, CDCl<sub>3</sub>) spectroscopy of 3aa**

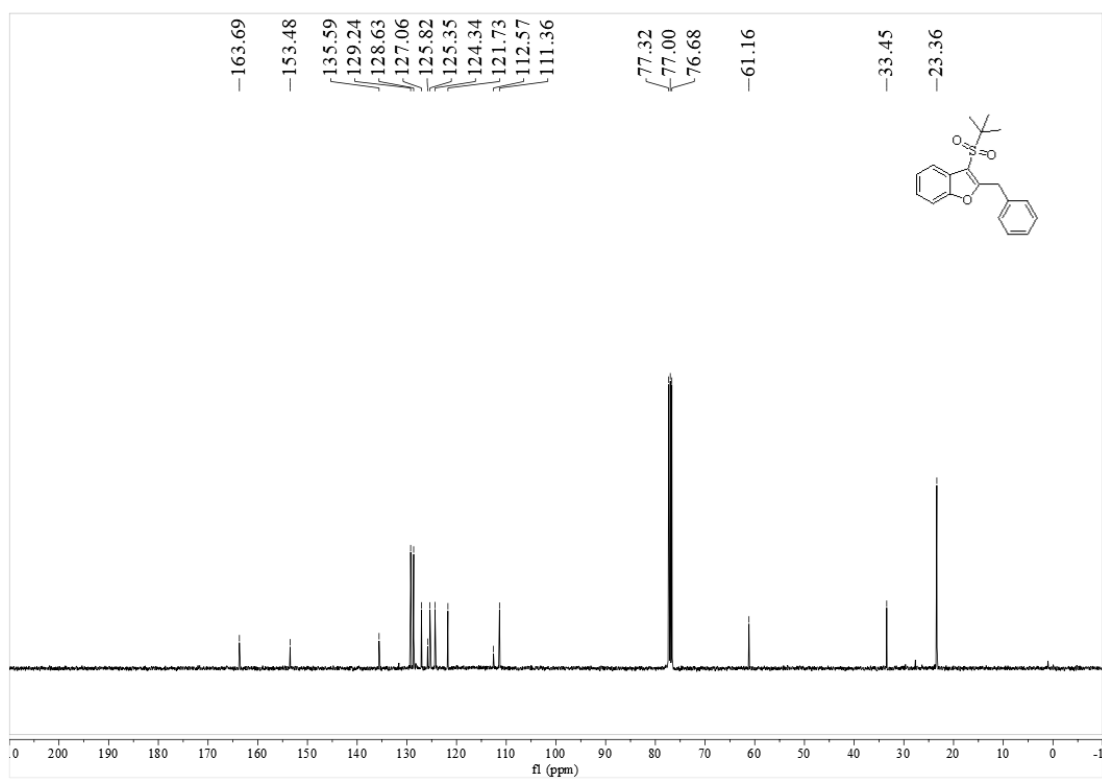

**<sup>1</sup>H NMR (400 MHz, CDCl<sub>3</sub>) spectroscopy of 3ab**

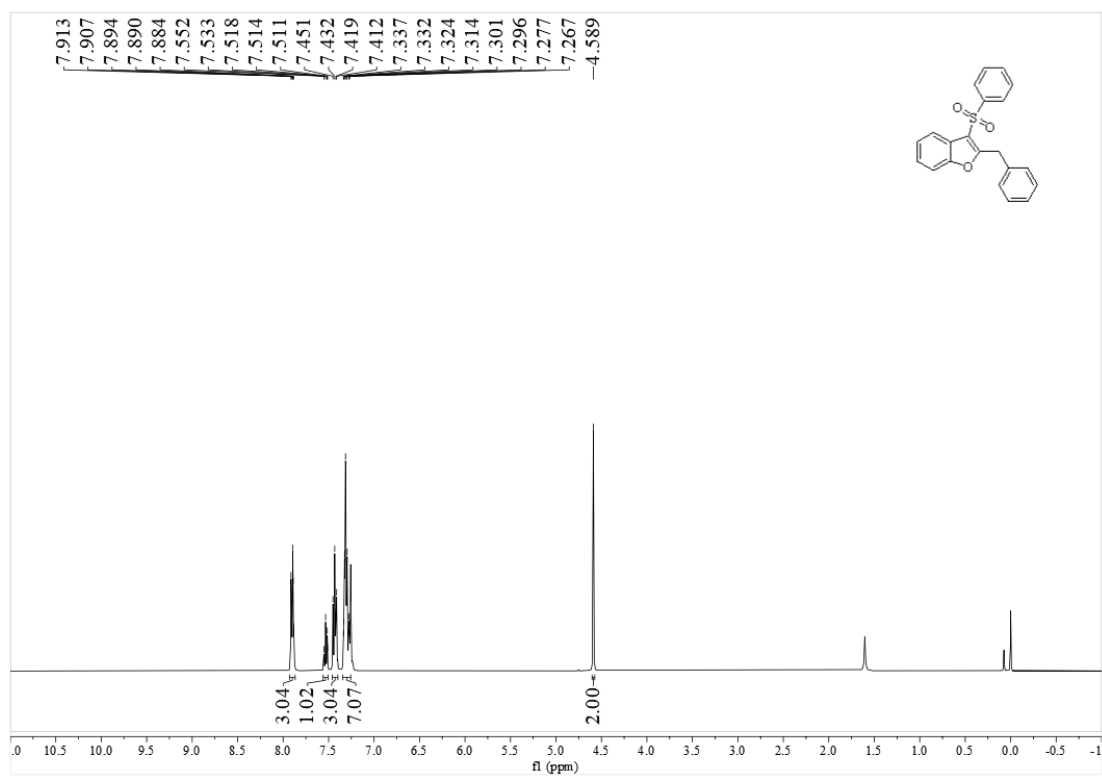

**<sup>13</sup>C NMR (100 MHz, CDCl<sub>3</sub>) spectroscopy of 3ab**

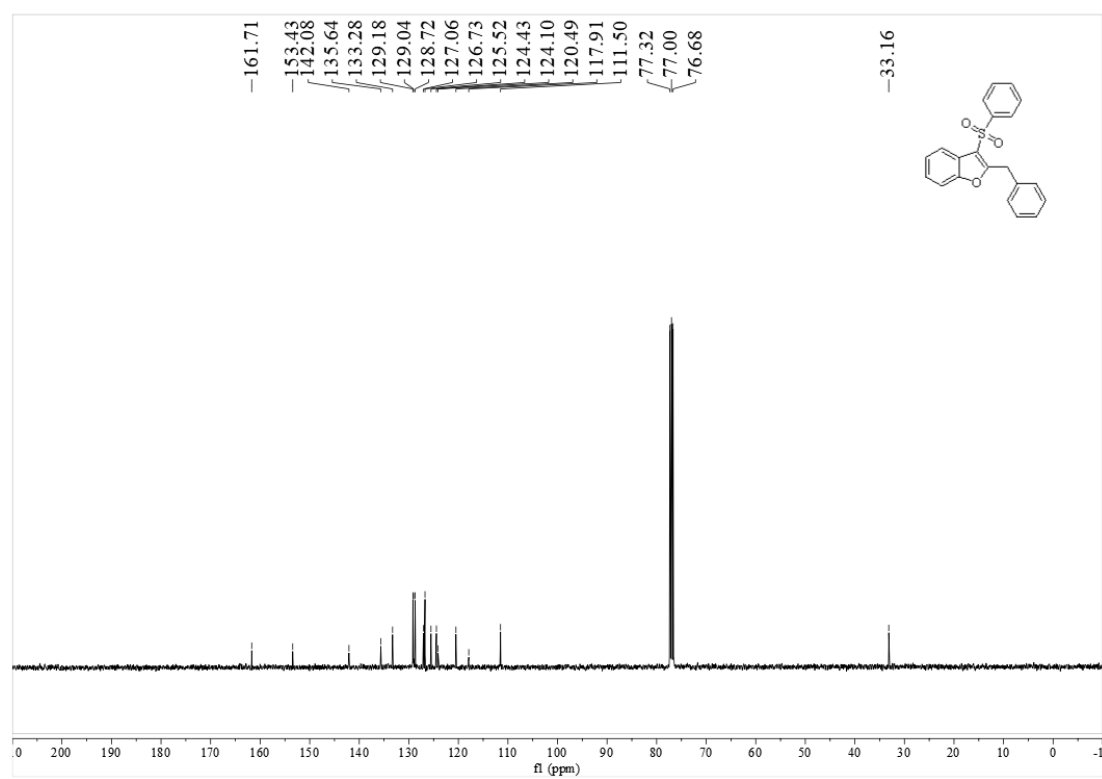



<sup>1</sup>H NMR (400 MHz, CDCl<sub>3</sub>) spectroscopy of 7

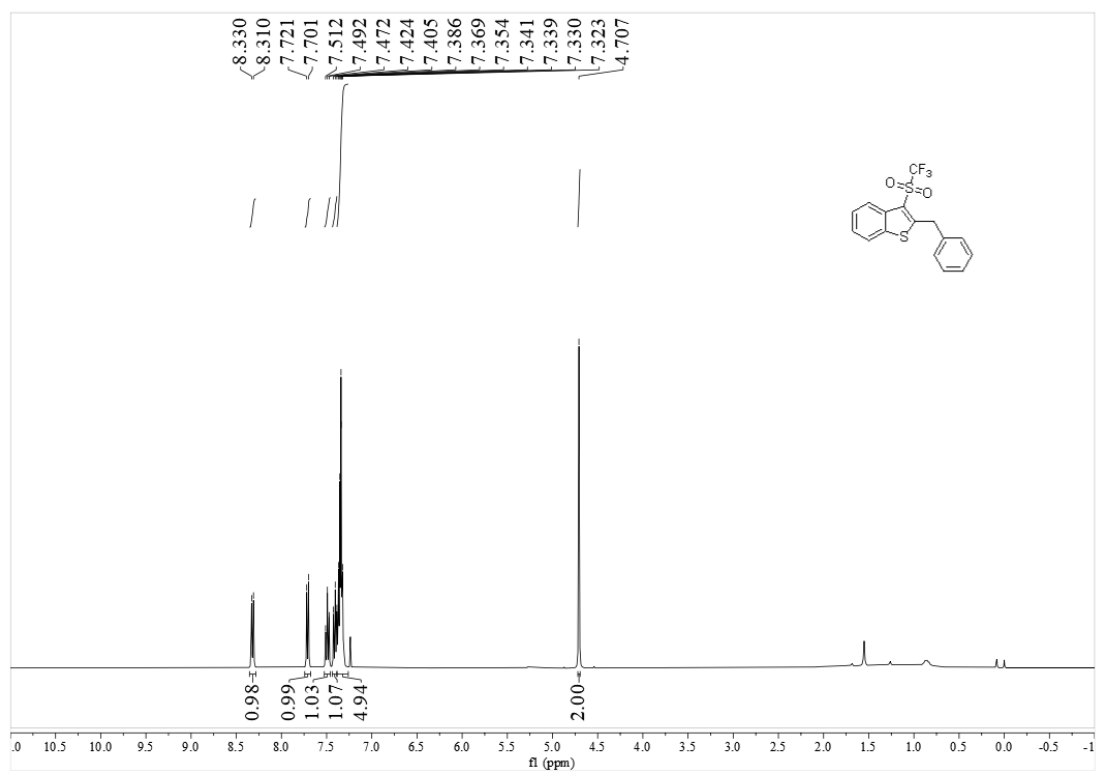

<sup>13</sup>C NMR (100 MHz, CDCl<sub>3</sub>) spectroscopy of 7

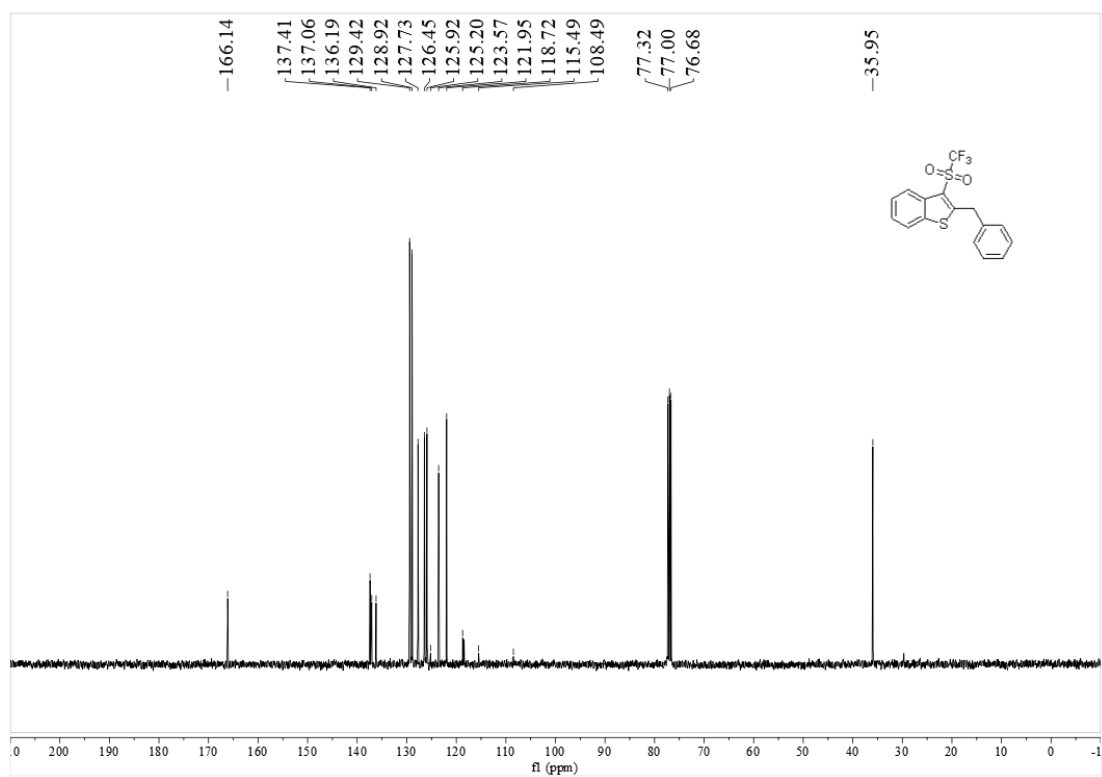

**<sup>19</sup>F NMR (376 MHz, CDCl<sub>3</sub>) spectroscopy of 7**

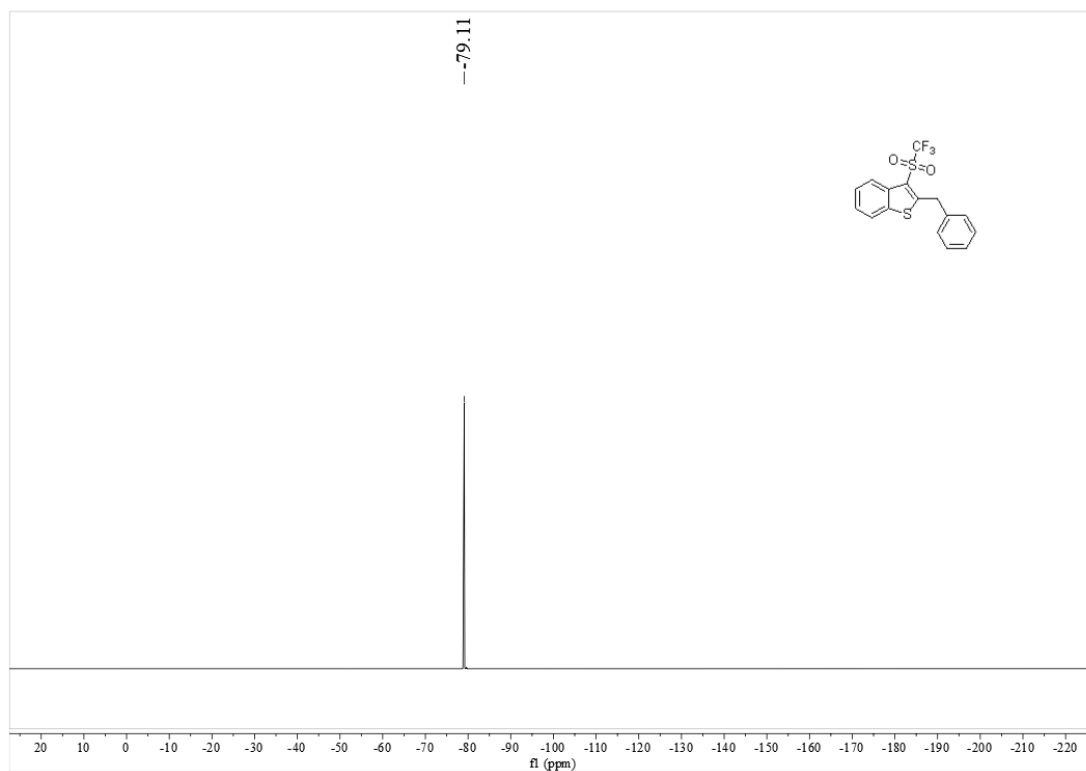

**<sup>1</sup>H NMR (400 MHz, CDCl<sub>3</sub>) spectroscopy of 5a**

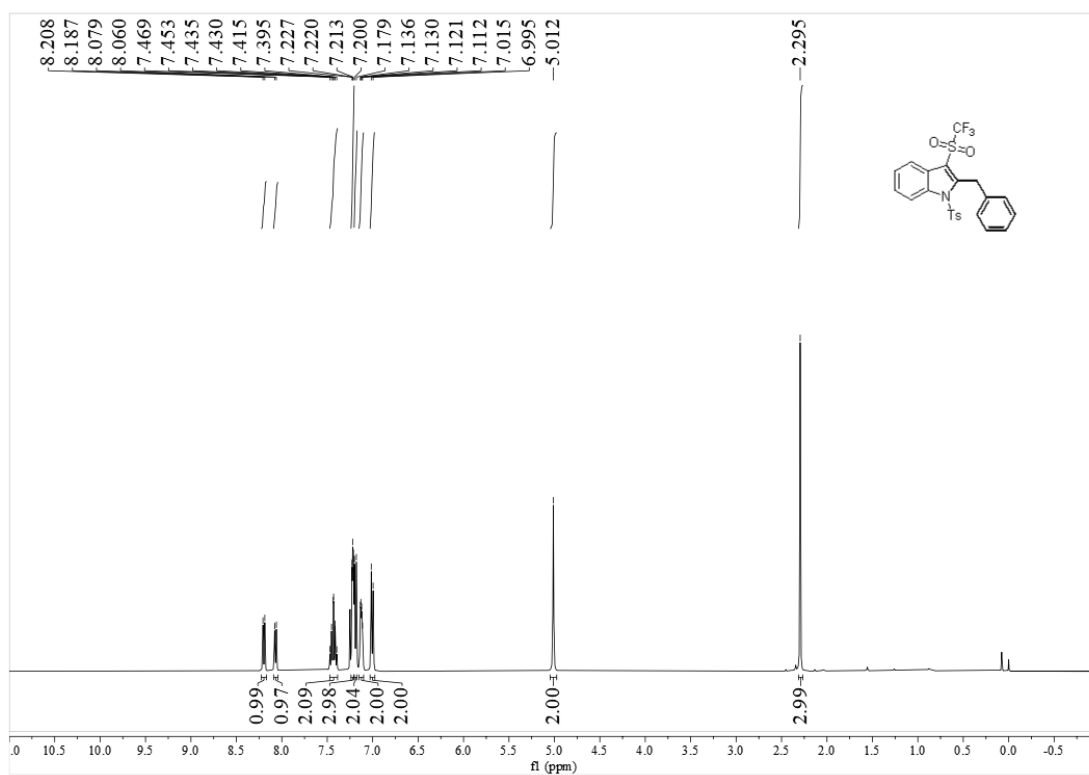

**<sup>13</sup>C NMR (100 MHz, CDCl<sub>3</sub>) spectroscopy of 5a**

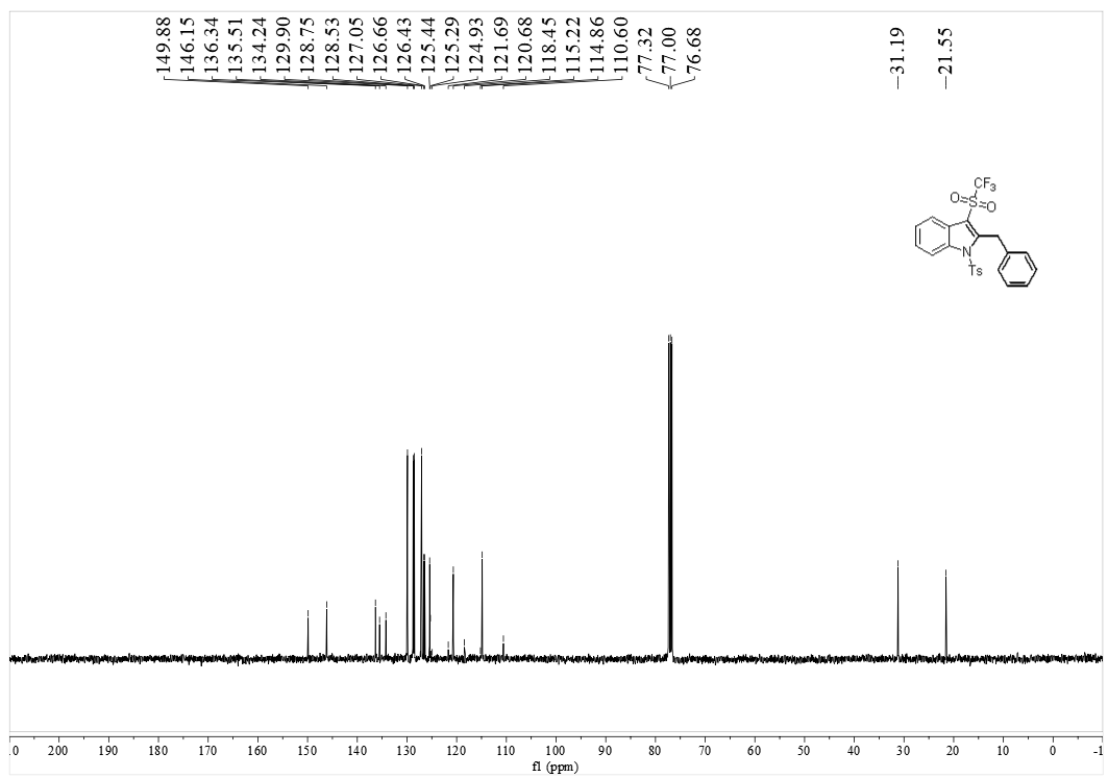

**<sup>19</sup>F NMR (376 MHz, CDCl<sub>3</sub>) spectroscopy of 5a**

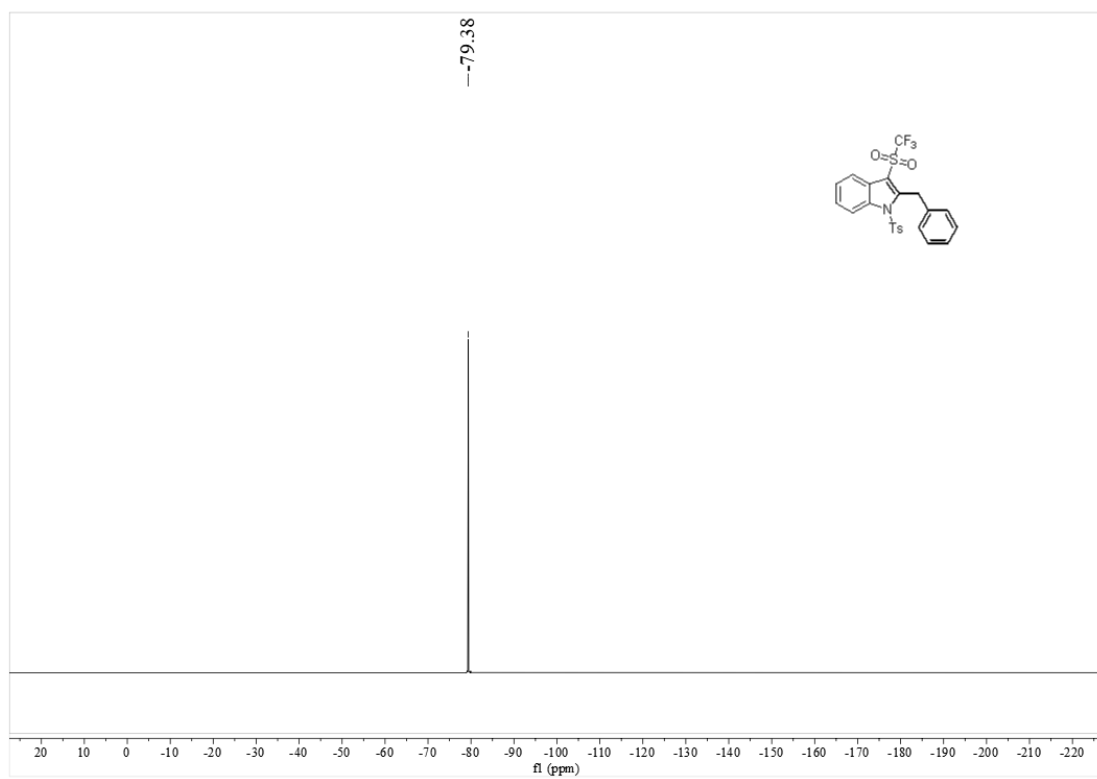

**<sup>1</sup>H NMR (400 MHz, CDCl<sub>3</sub>) spectroscopy of 5b**

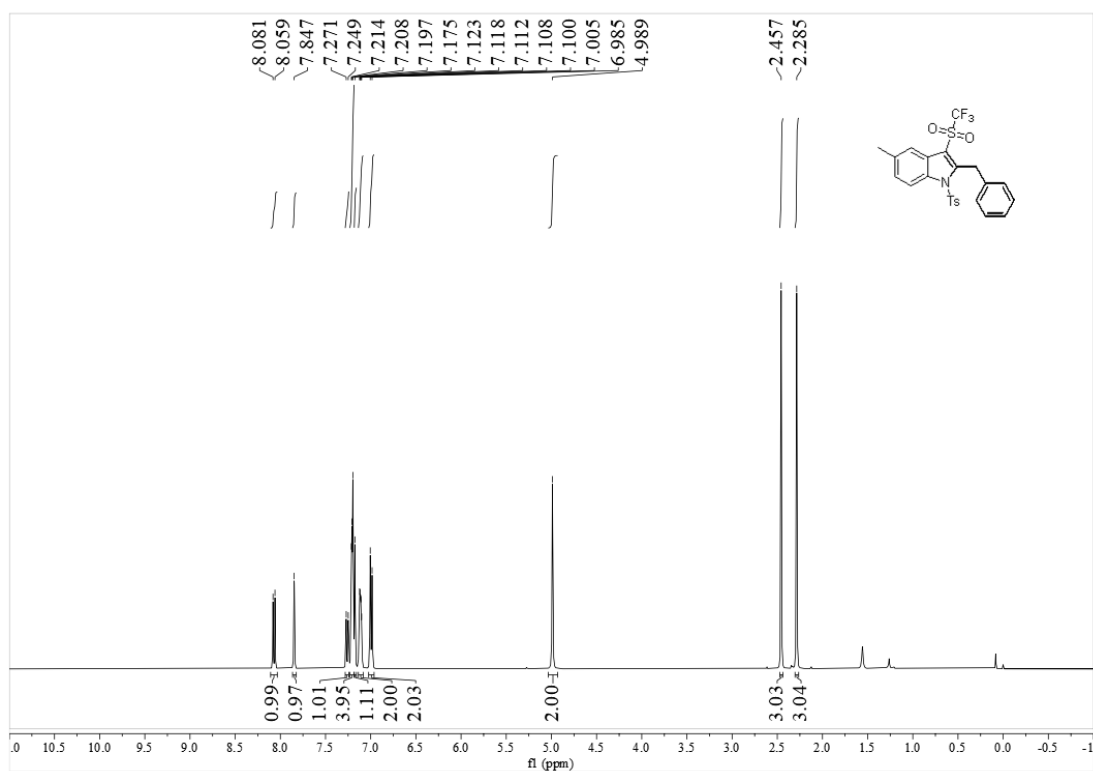

**<sup>13</sup>C NMR (100 MHz, CDCl<sub>3</sub>) spectroscopy of 5b**

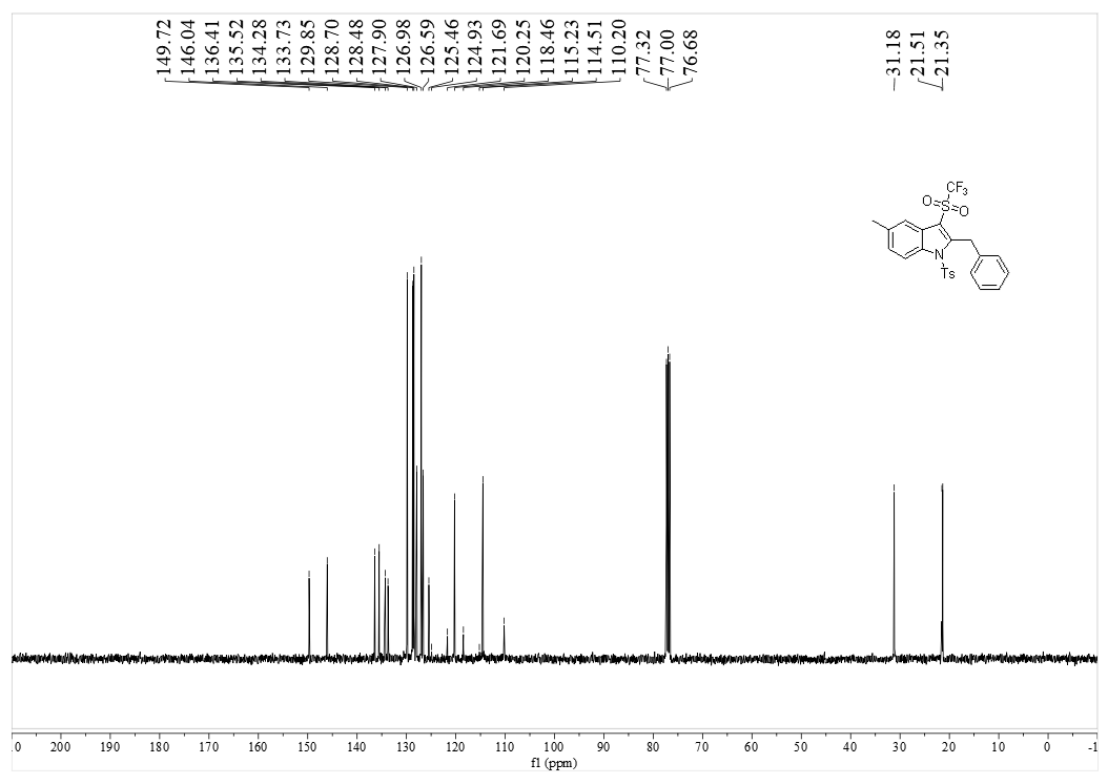

**$^{19}\text{F}$  NMR (376 MHz,  $\text{CDCl}_3$ ) spectroscopy of **5b****

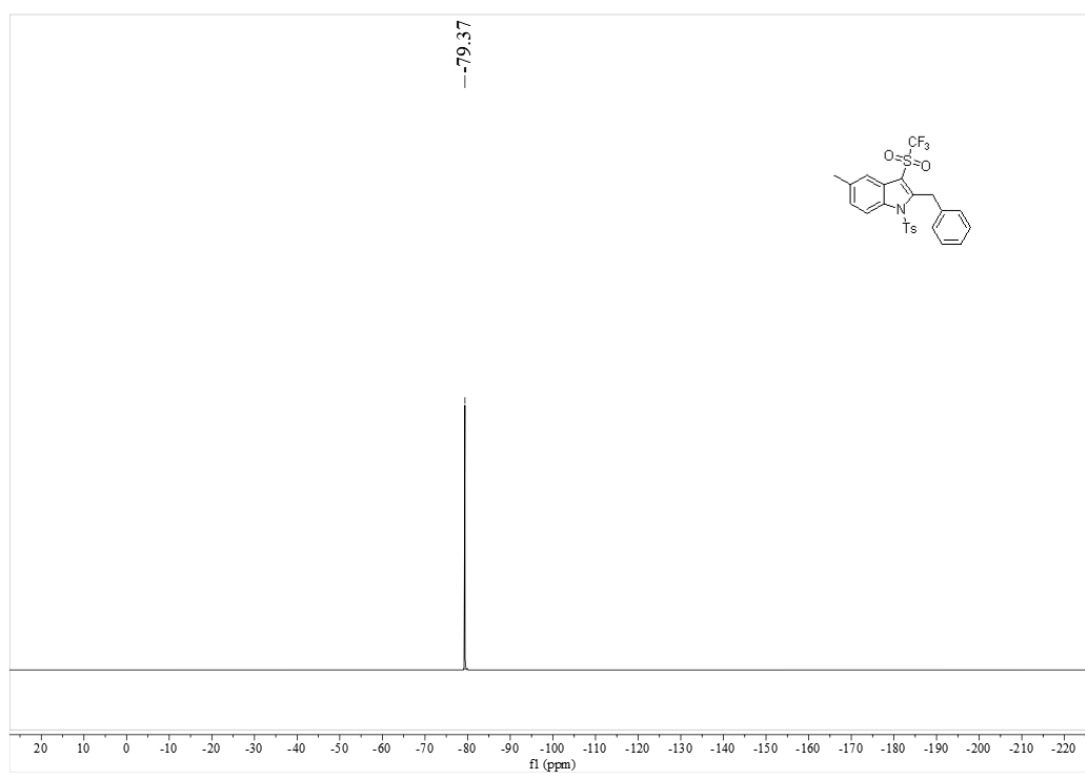

**$^1\text{H}$  NMR (400 MHz,  $\text{CDCl}_3$ ) spectroscopy of **5c****

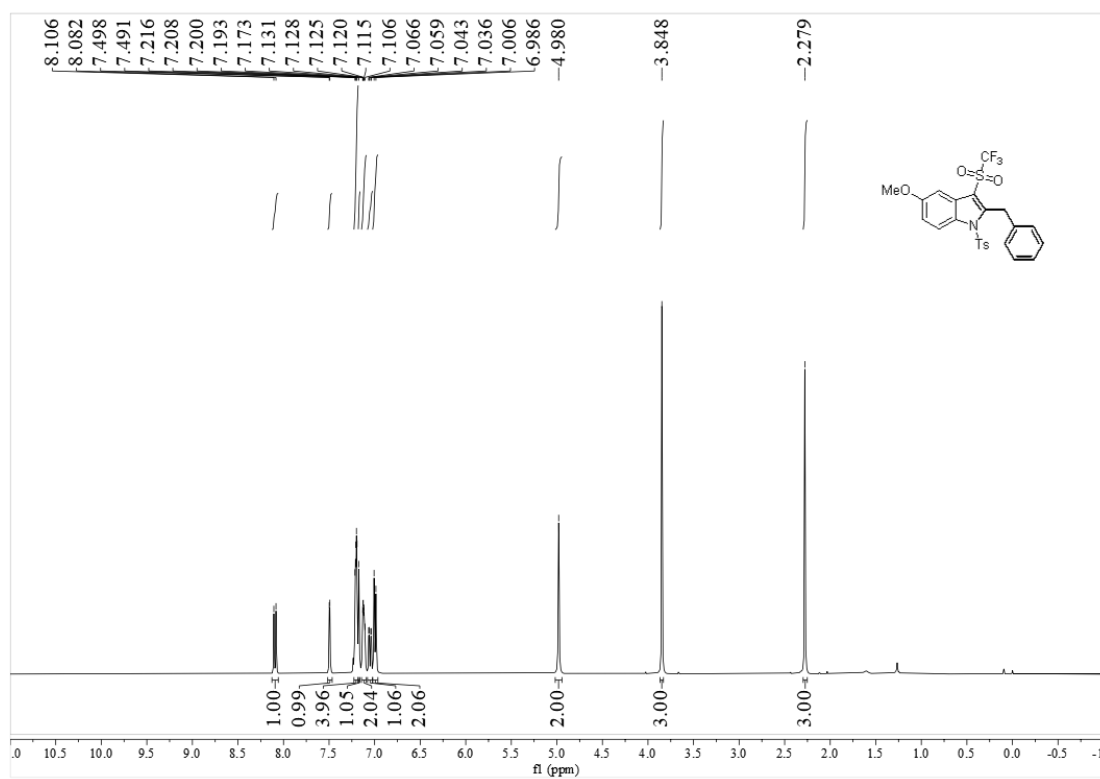

<sup>13</sup>C NMR (100 MHz, CDCl<sub>3</sub>) spectroscopy of **5c**

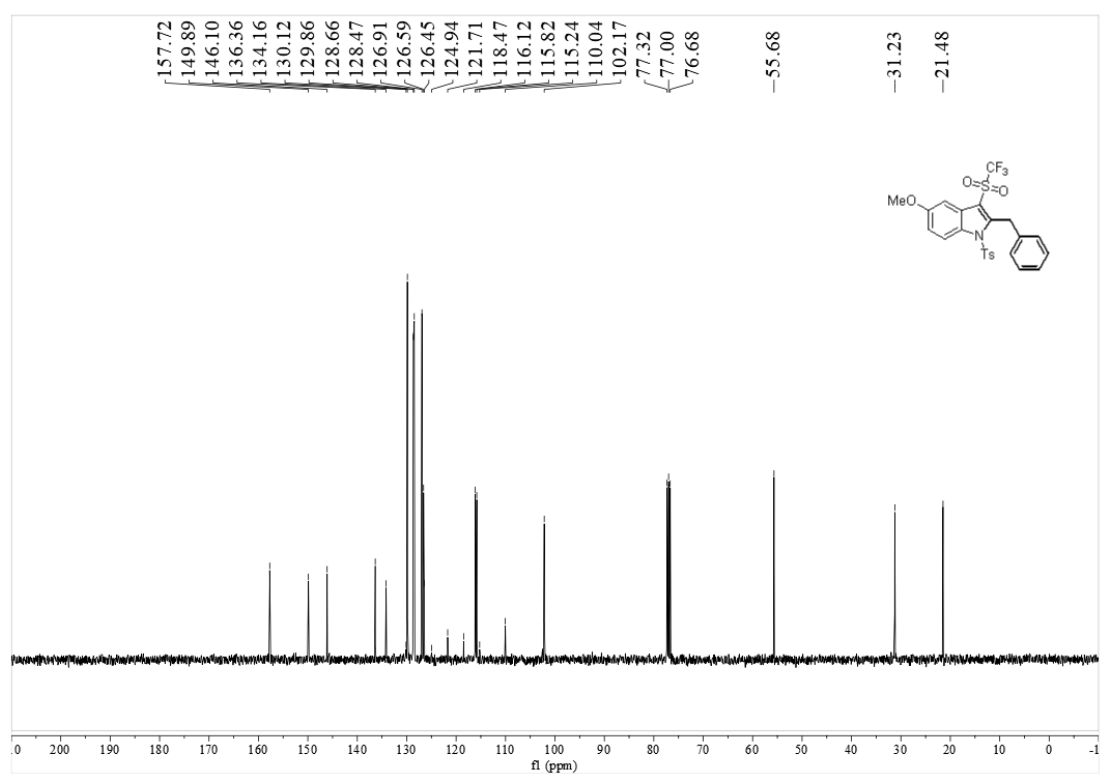

<sup>19</sup>F NMR (376 MHz, CDCl<sub>3</sub>) spectroscopy of **5c**

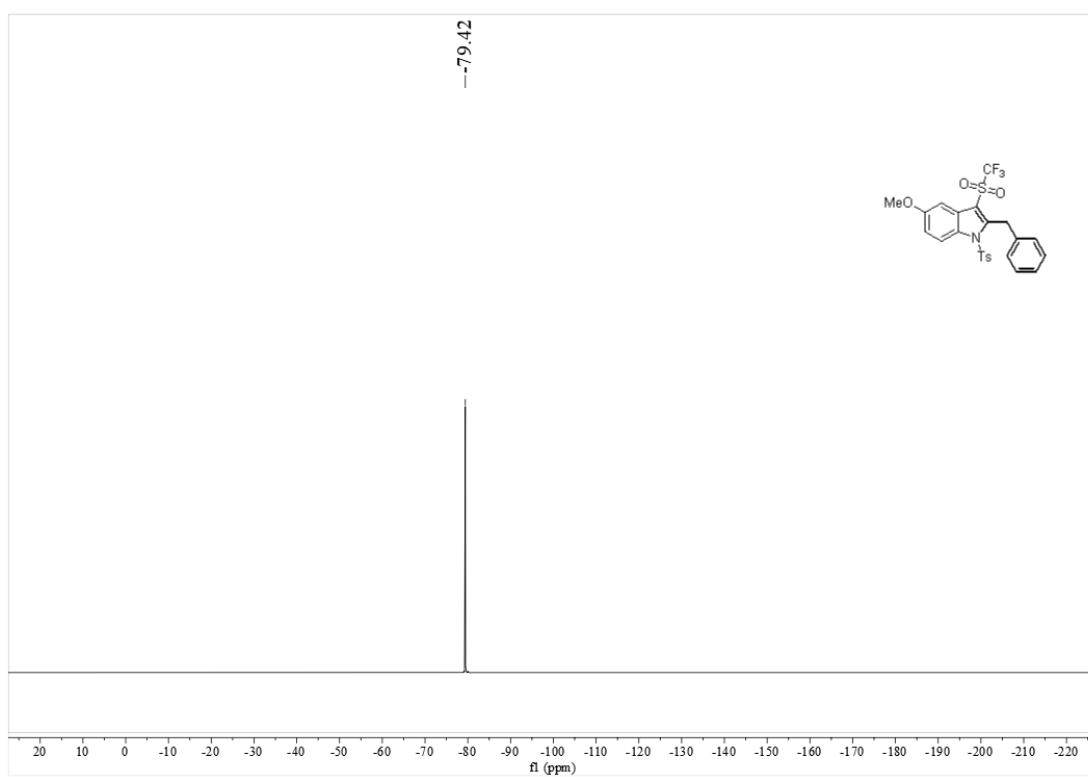

<sup>1</sup>H NMR (400 MHz, CDCl<sub>3</sub>) spectroscopy of **5d**

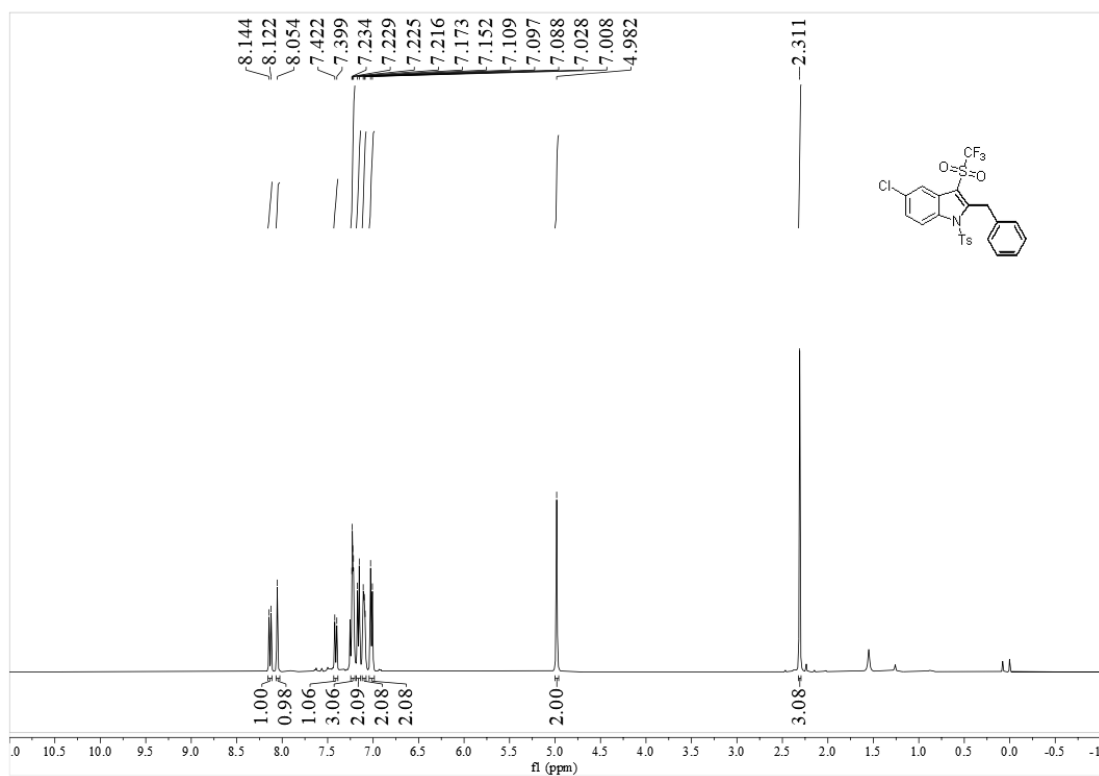

<sup>13</sup>C NMR (100 MHz, CDCl<sub>3</sub>) spectroscopy of **5d**

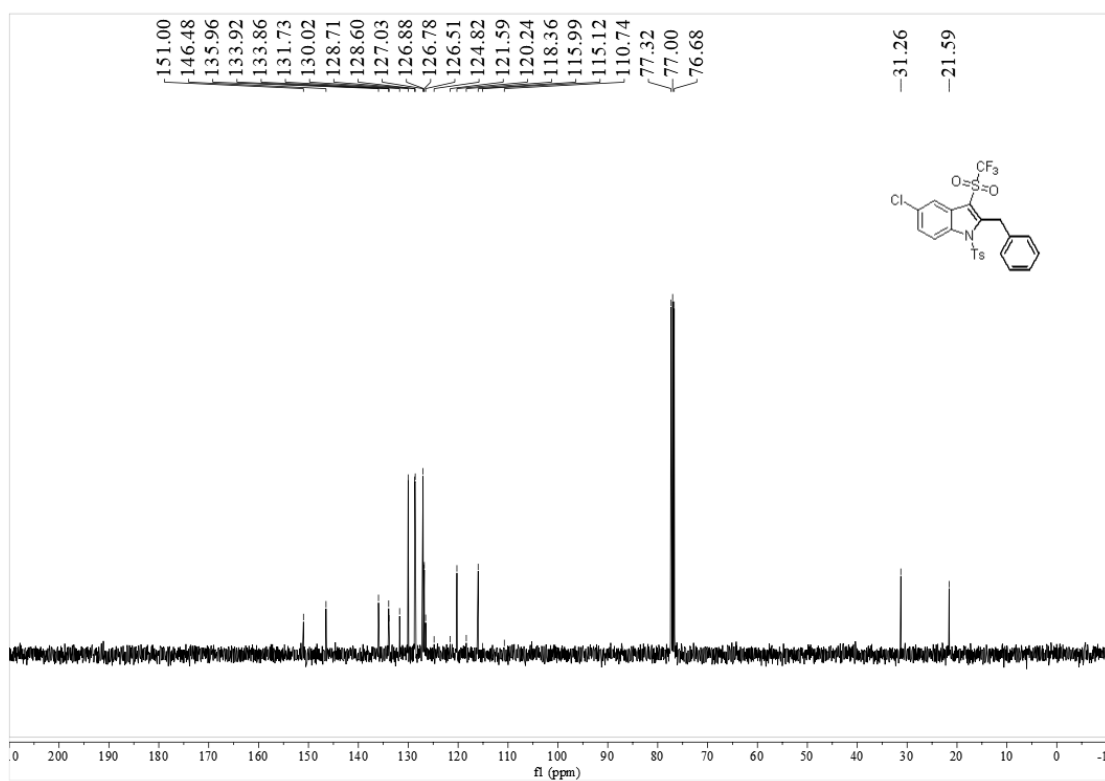

**<sup>19</sup>F NMR (376 MHz, CDCl<sub>3</sub>) spectroscopy of 5d**

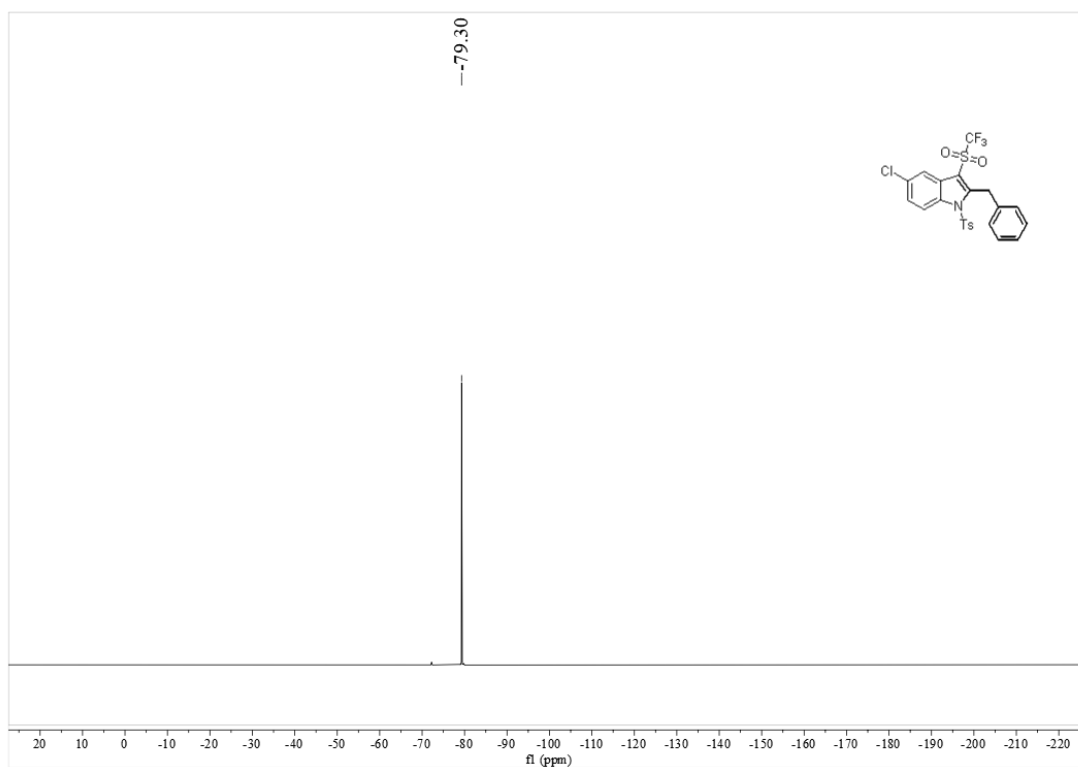

**<sup>1</sup>H NMR (400 MHz, CDCl<sub>3</sub>) spectroscopy of 5e**

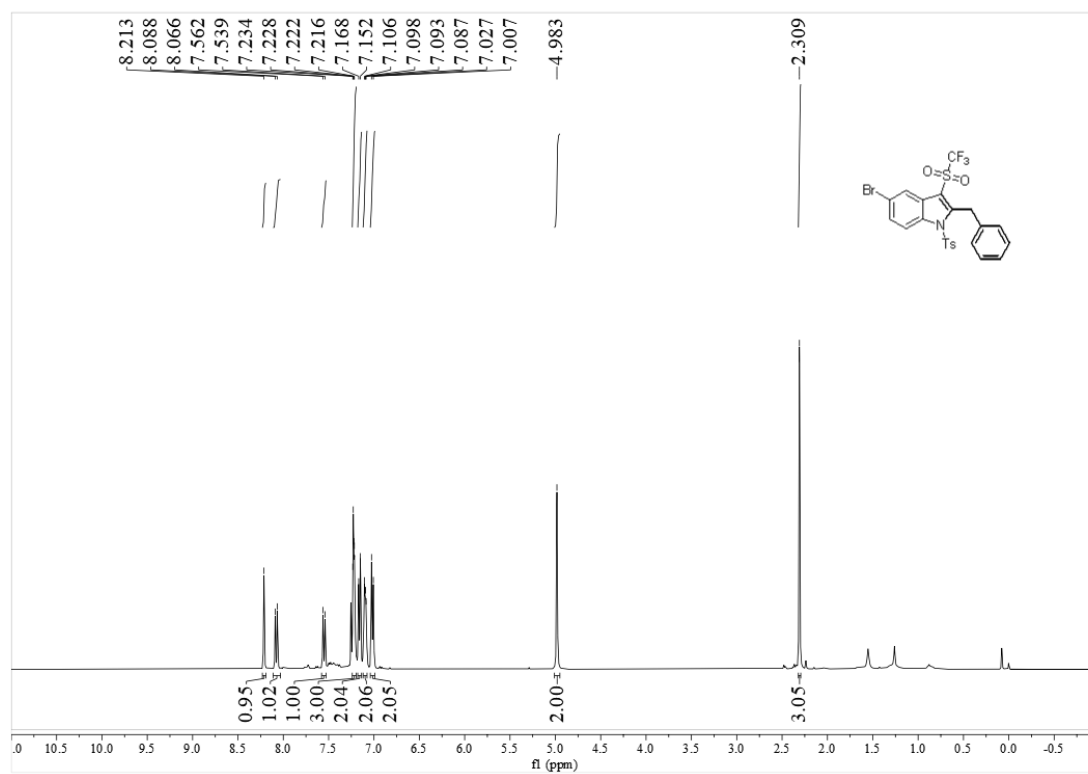



<sup>13</sup>C NMR (100 MHz, CDCl<sub>3</sub>) spectroscopy of **5e**

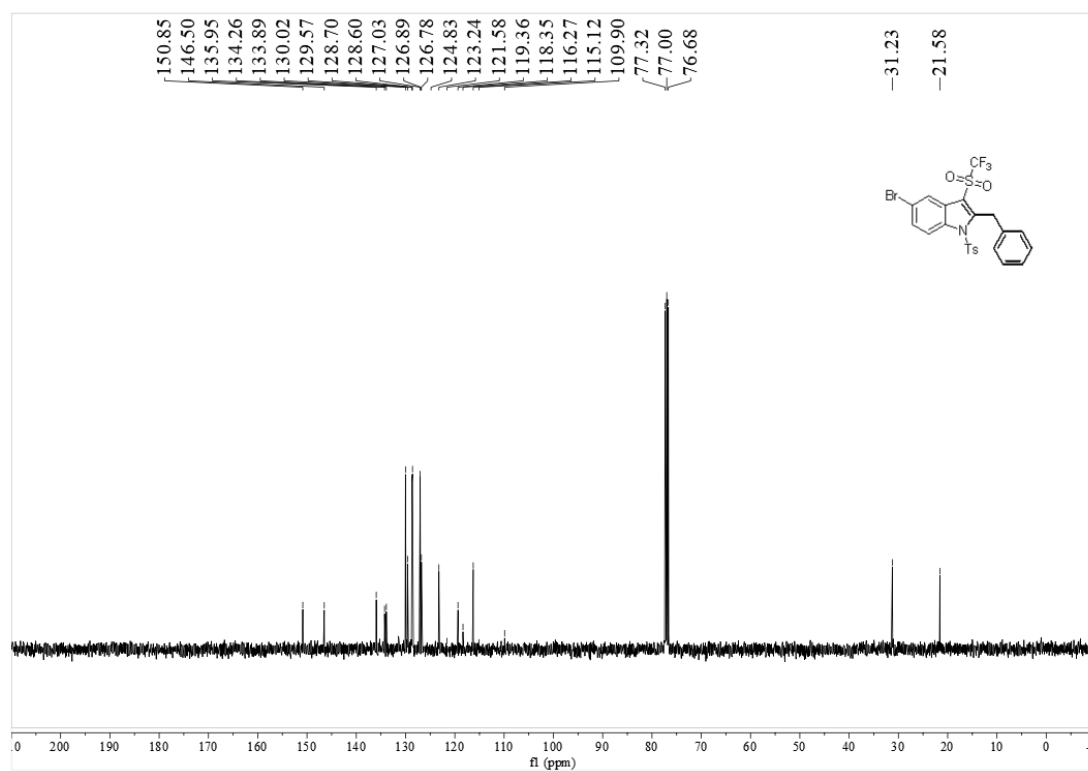

<sup>19</sup>F NMR (376 MHz, CDCl<sub>3</sub>) spectroscopy of **5e**

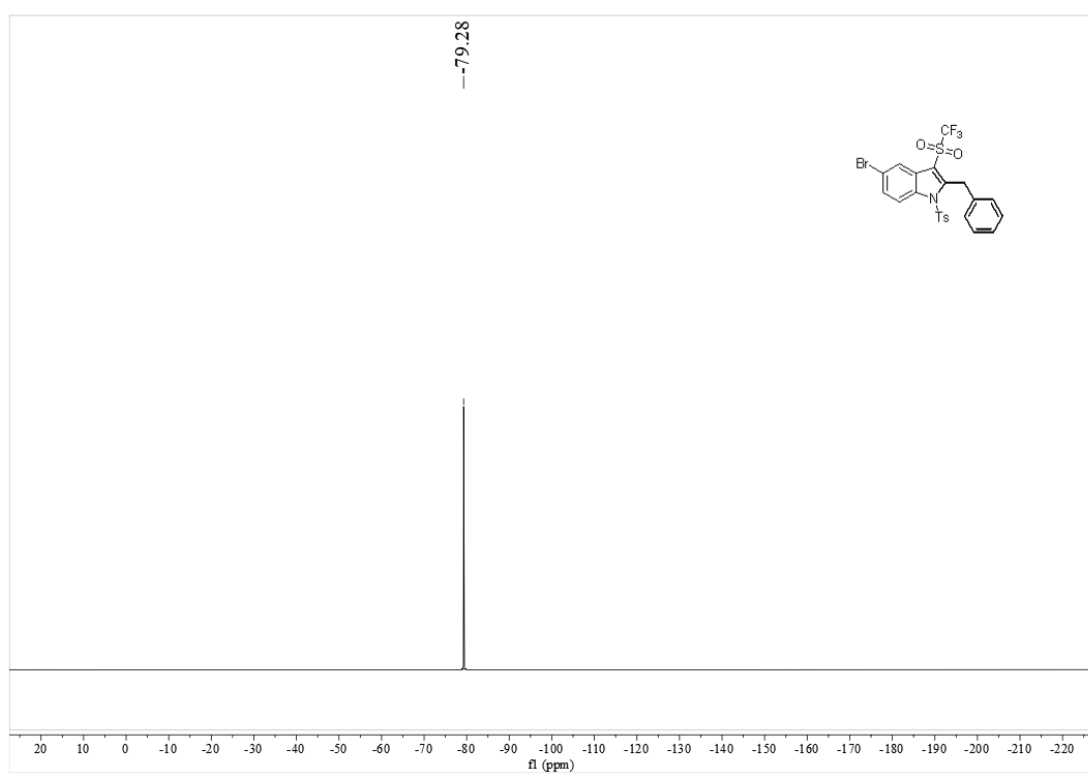

<sup>1</sup>H NMR (400 MHz, CDCl<sub>3</sub>) spectroscopy of **5f**

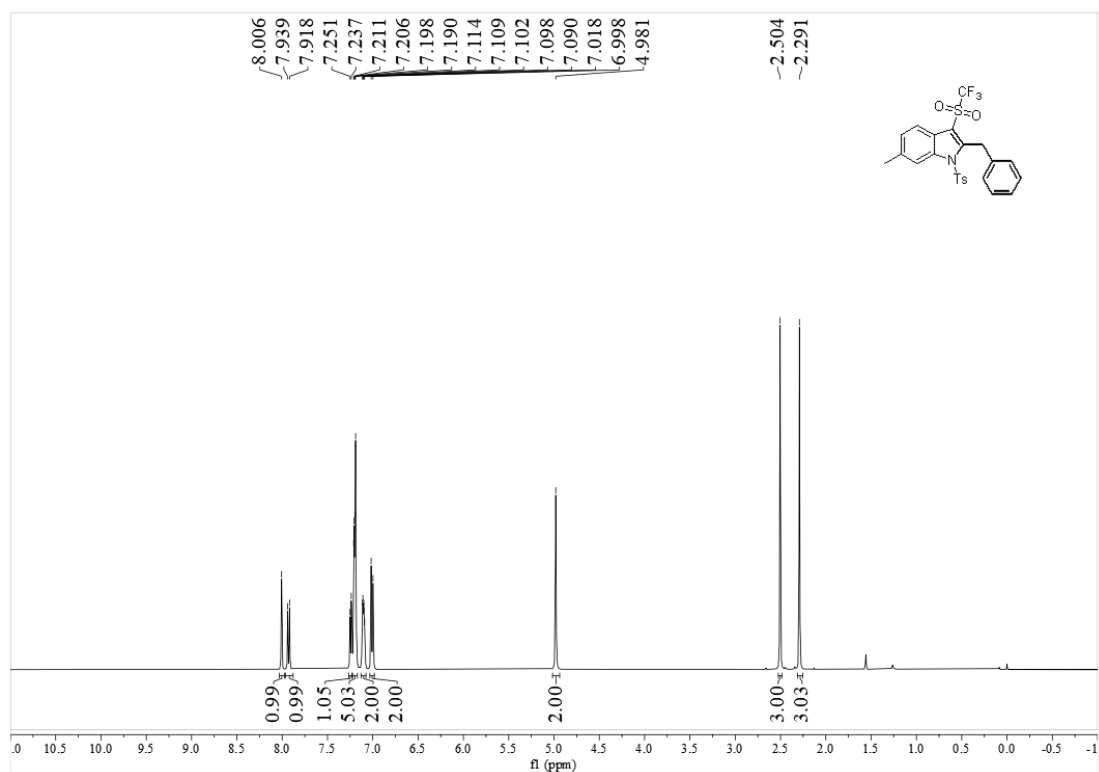

<sup>13</sup>C NMR (100 MHz, CDCl<sub>3</sub>) spectroscopy of **5f**

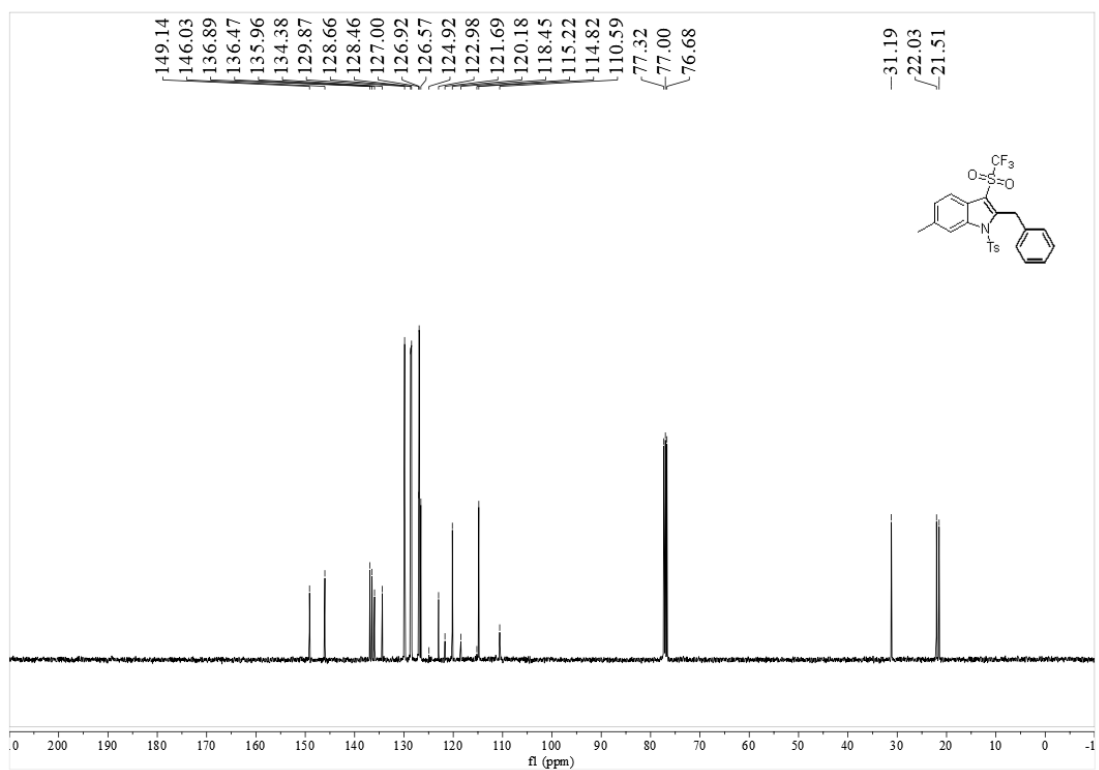

**<sup>19</sup>F NMR (376 MHz, CDCl<sub>3</sub>) spectroscopy of 5f**

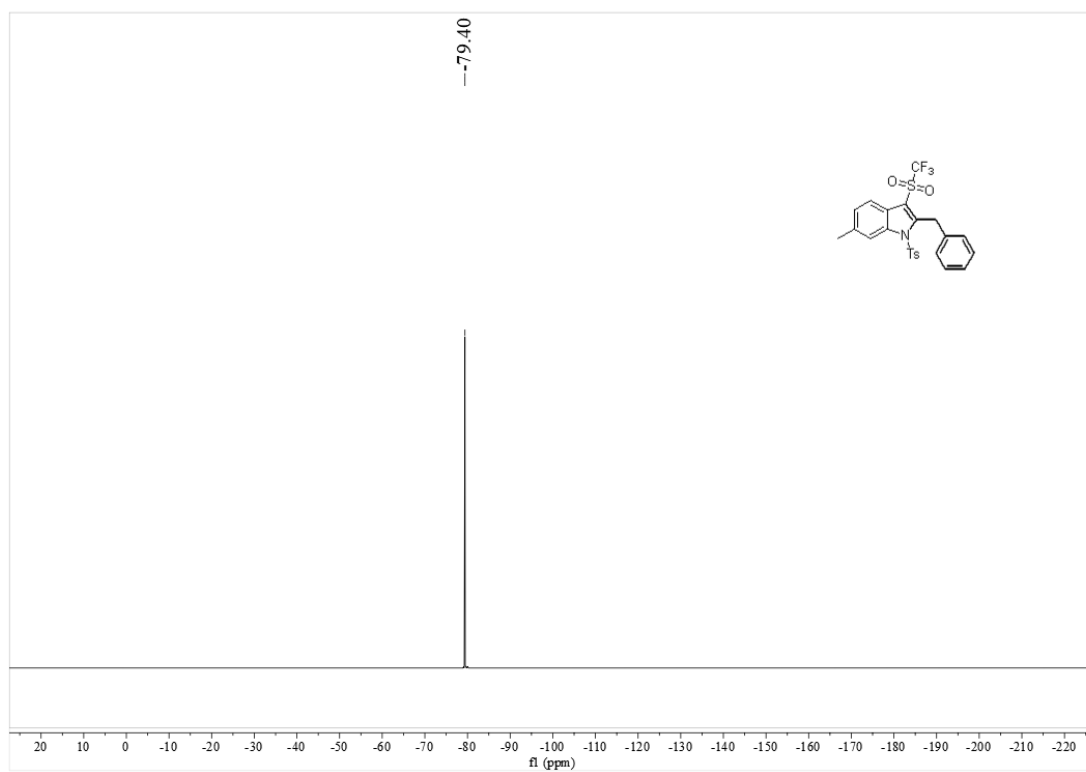

**<sup>1</sup>H NMR (400 MHz, CDCl<sub>3</sub>) spectroscopy of 5g**

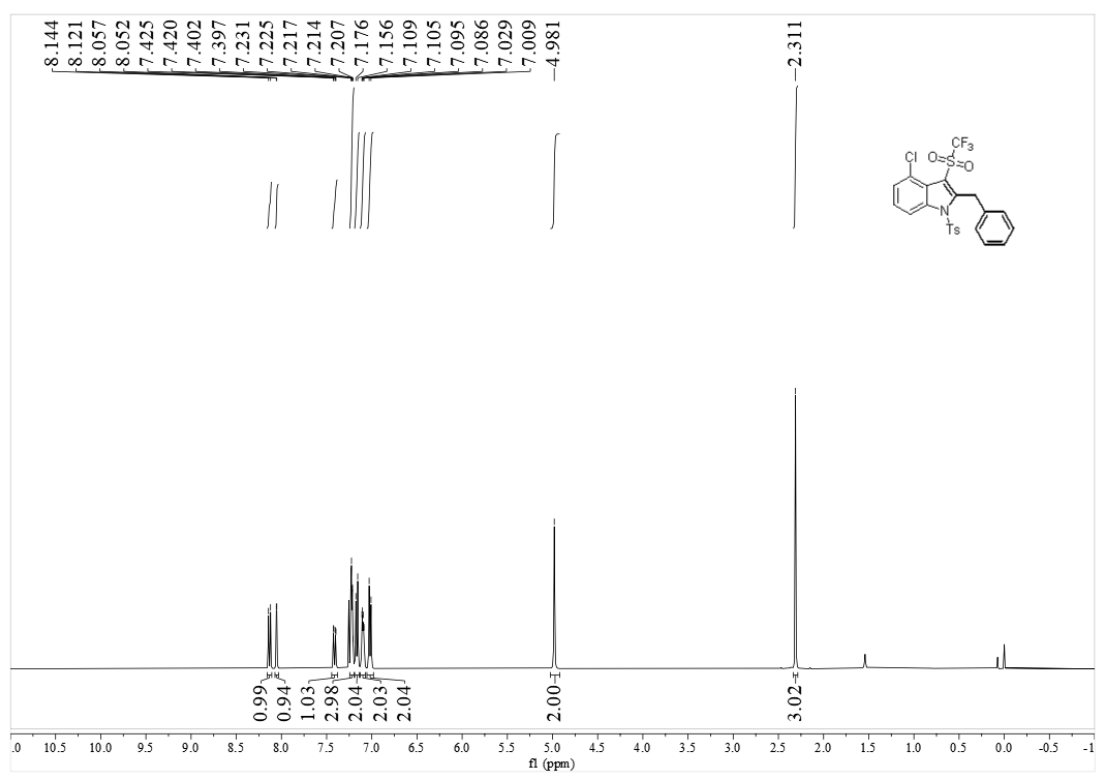

<sup>13</sup>C NMR (100 MHz, CDCl<sub>3</sub>) spectroscopy of **5g**

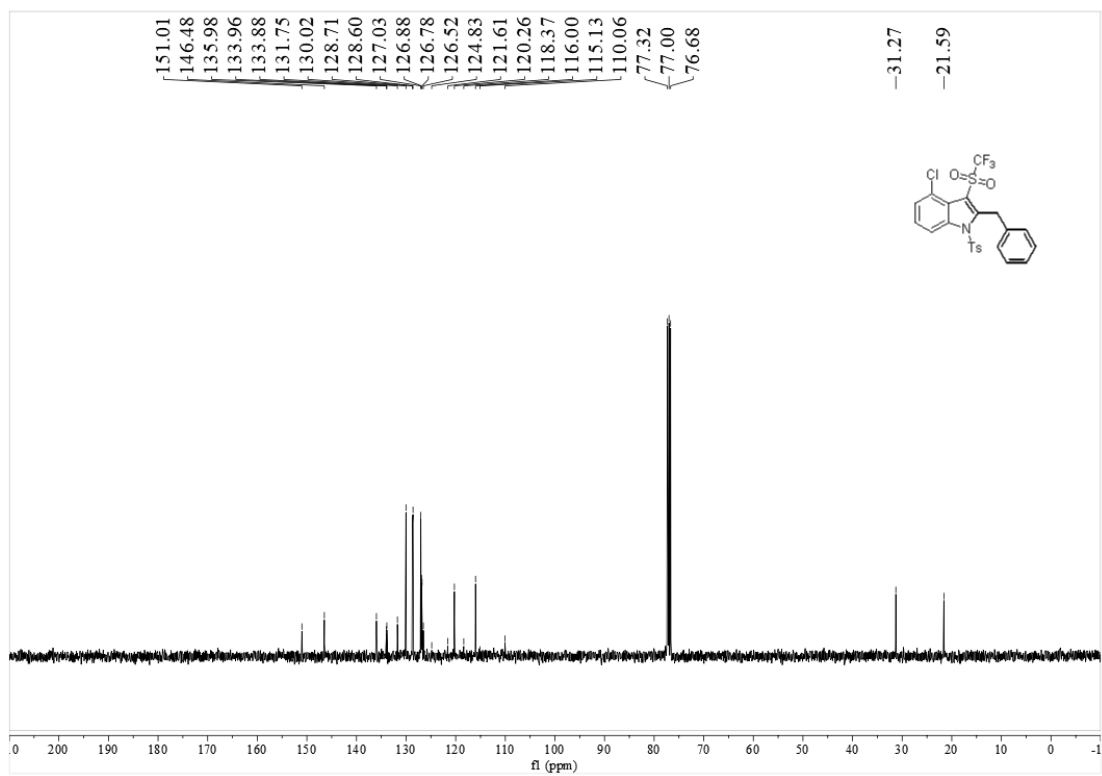

<sup>19</sup>F NMR (376 MHz, CDCl<sub>3</sub>) spectroscopy of **5g**

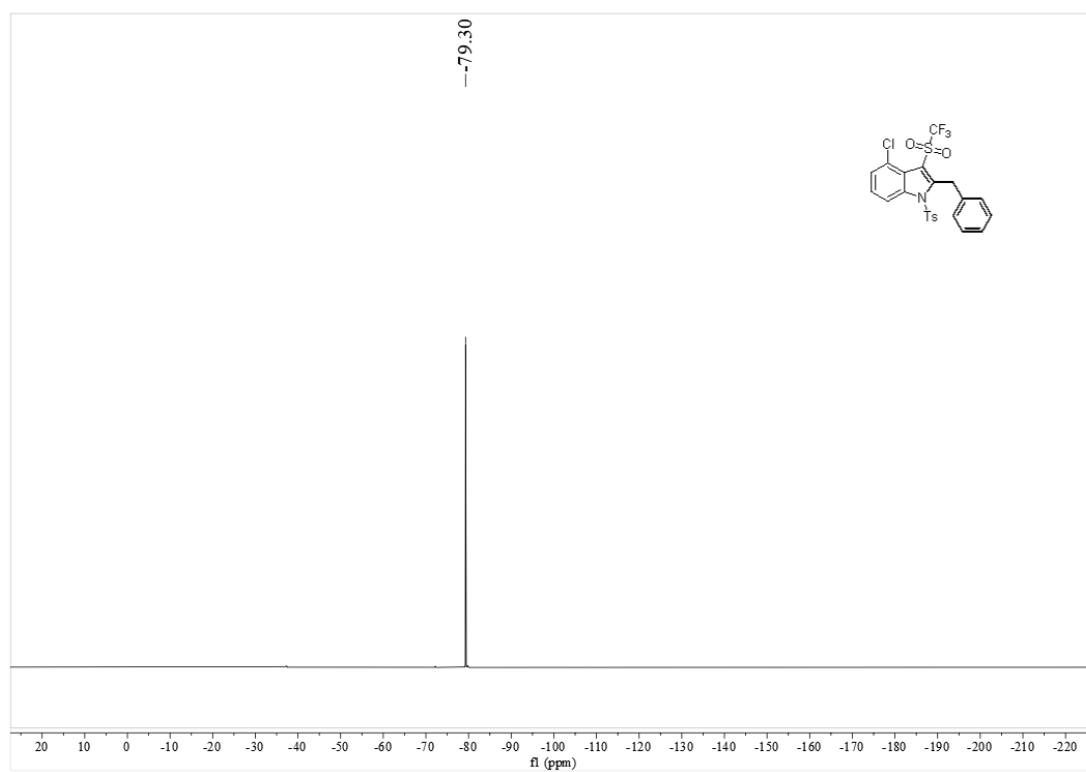

**<sup>1</sup>H NMR (400 MHz, CDCl<sub>3</sub>) spectroscopy of 5h**

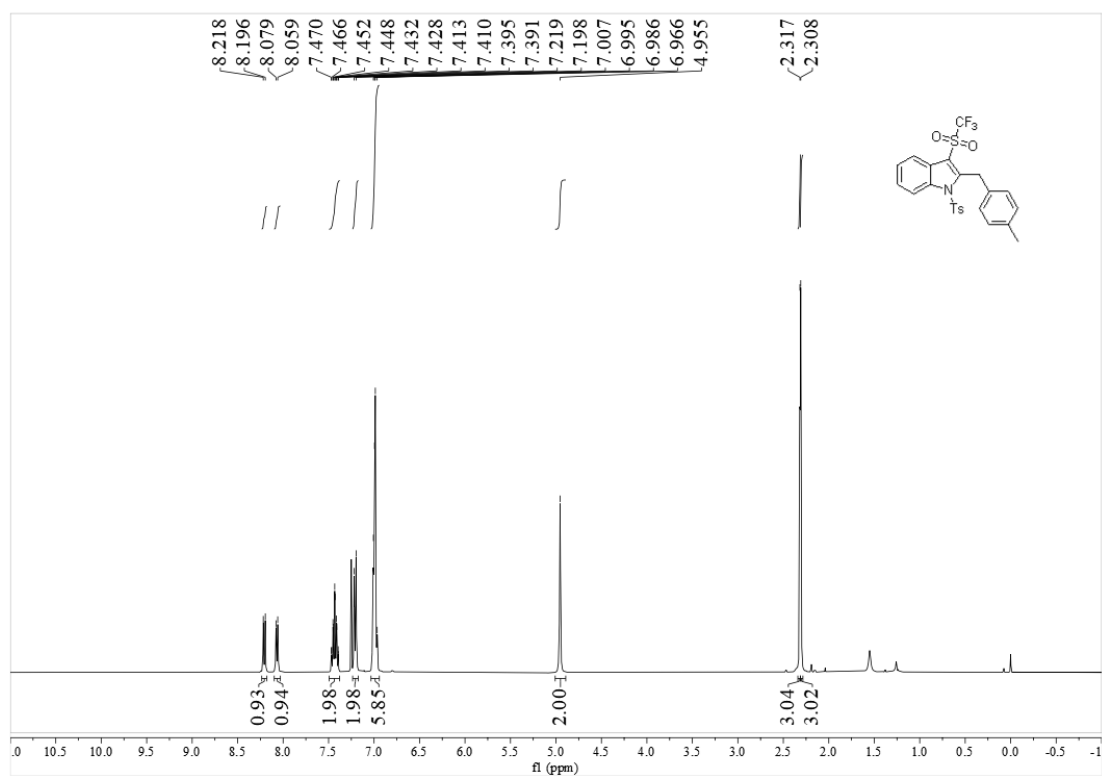

**<sup>13</sup>C NMR (100 MHz, CDCl<sub>3</sub>) spectroscopy of 5h**

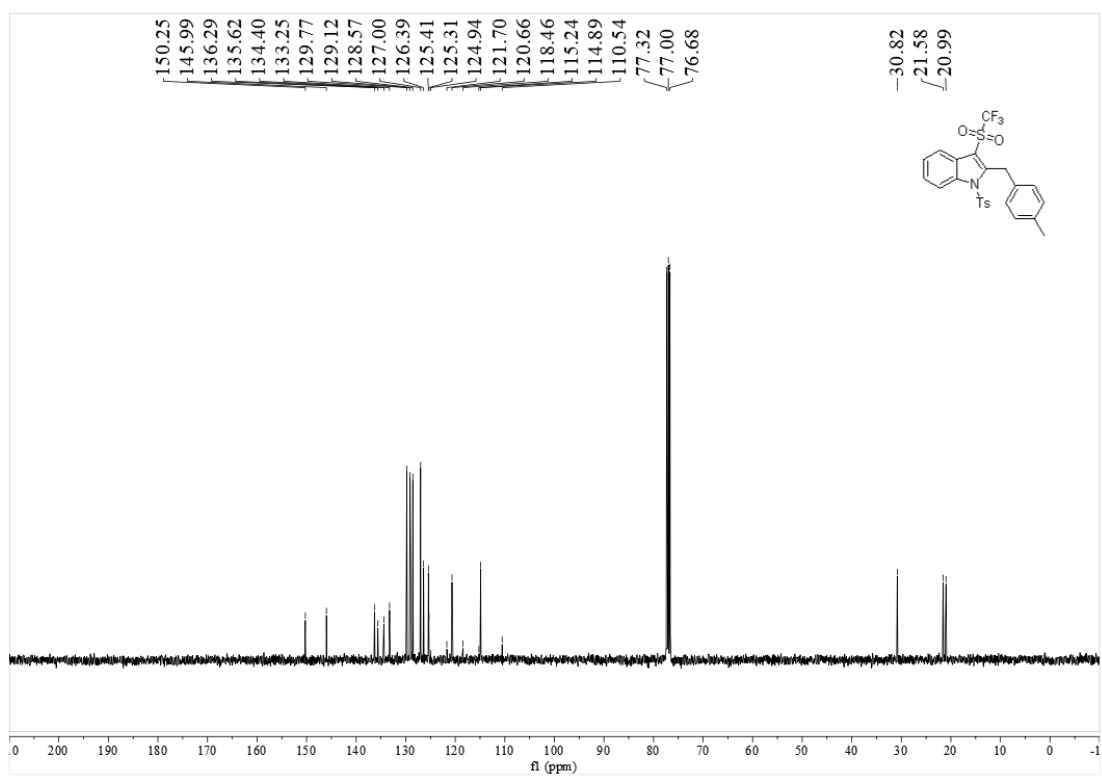

**<sup>19</sup>F NMR (376 MHz, CDCl<sub>3</sub>) spectroscopy of 5h**

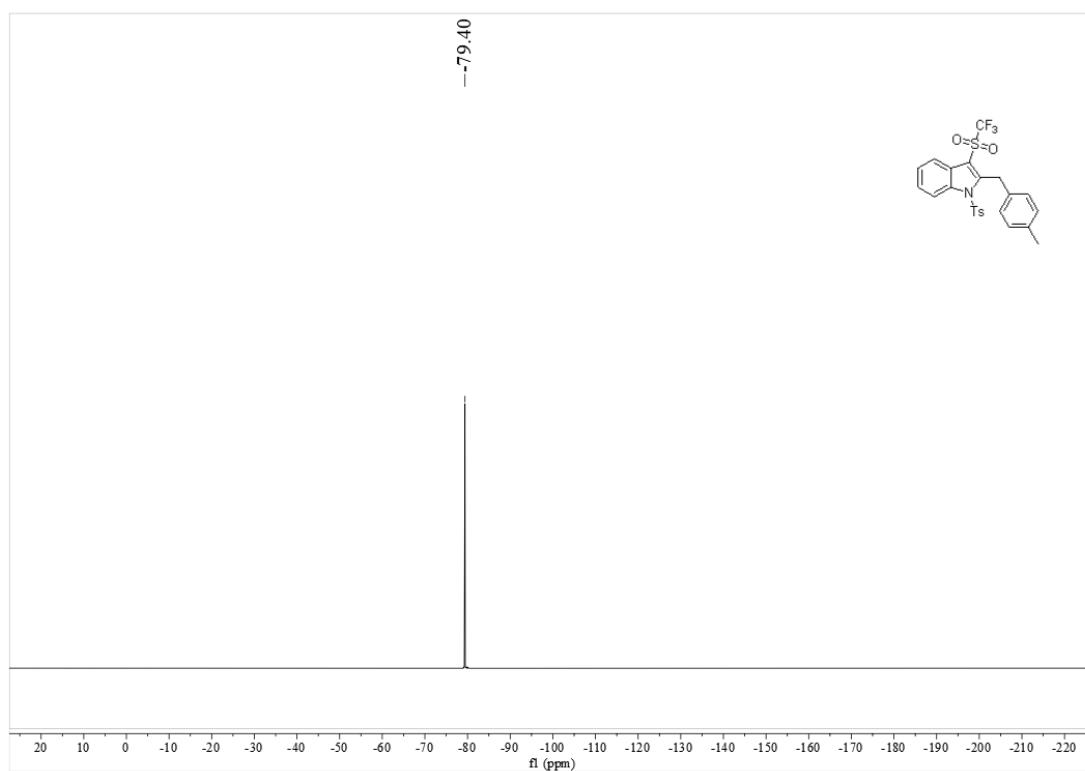

**<sup>1</sup>H NMR (400 MHz, CDCl<sub>3</sub>) spectroscopy of 5i**

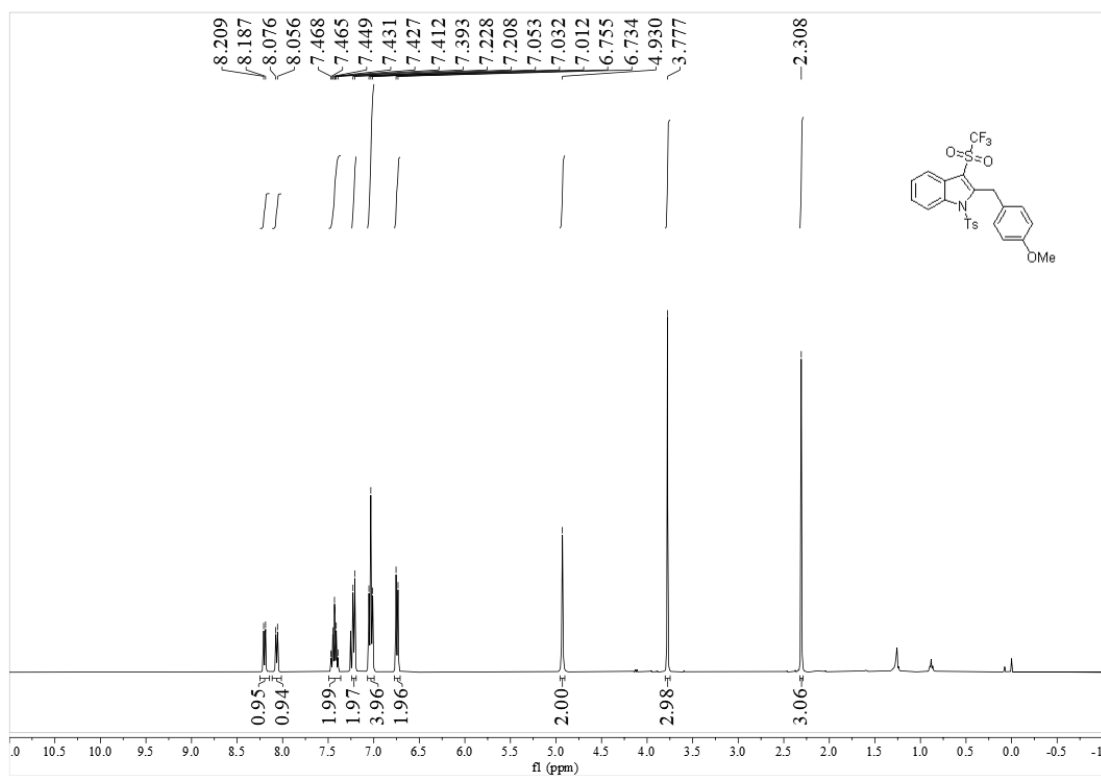

<sup>13</sup>C NMR (100 MHz, CDCl<sub>3</sub>) spectroscopy of **5i**

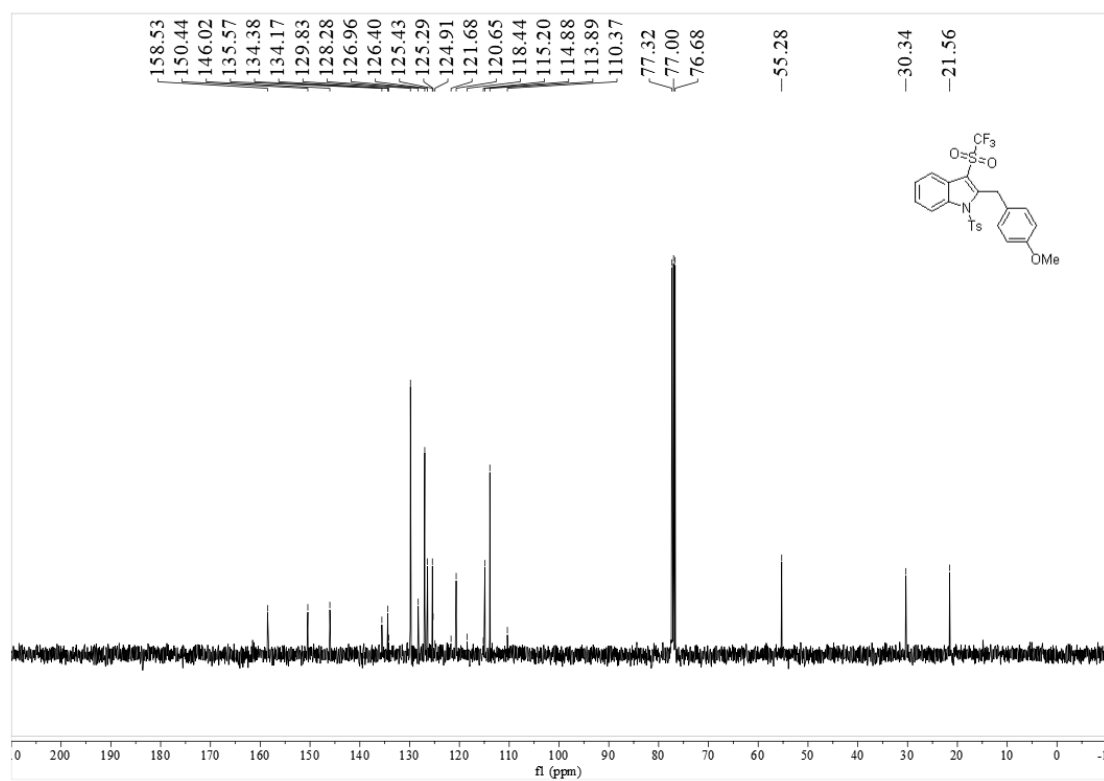

<sup>19</sup>F NMR (376 MHz, CDCl<sub>3</sub>) spectroscopy of **5i**

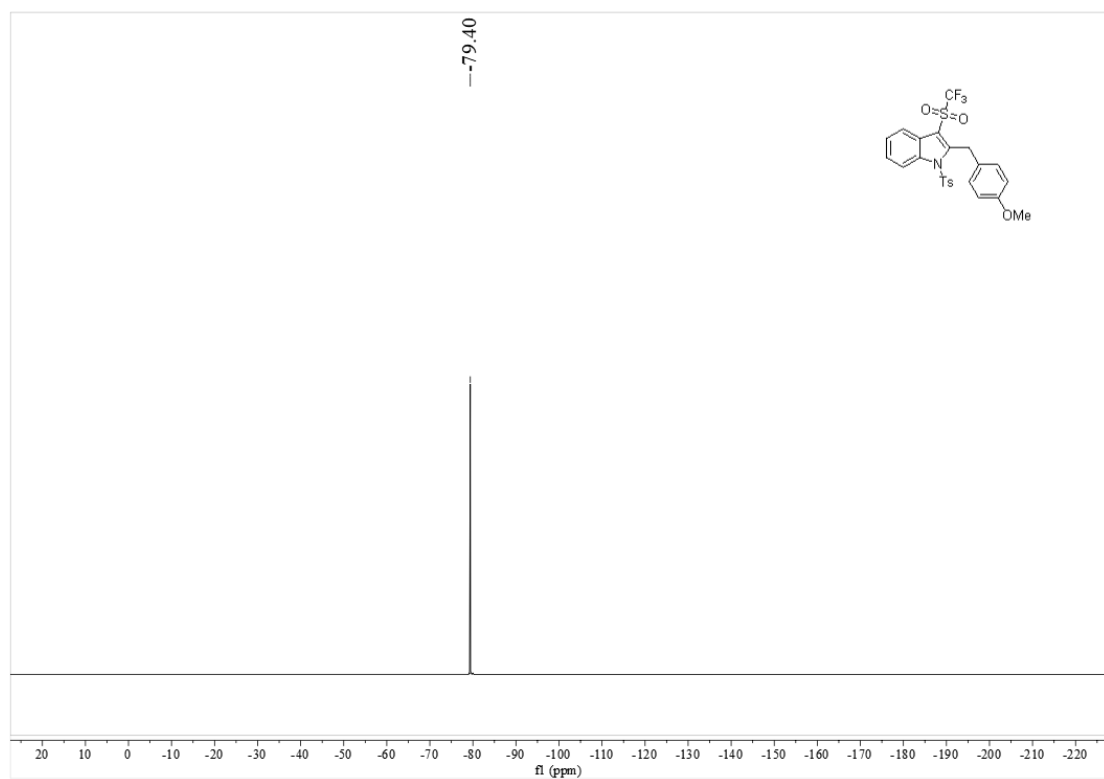

<sup>1</sup>H NMR (400 MHz, CDCl<sub>3</sub>) spectroscopy of **5j**

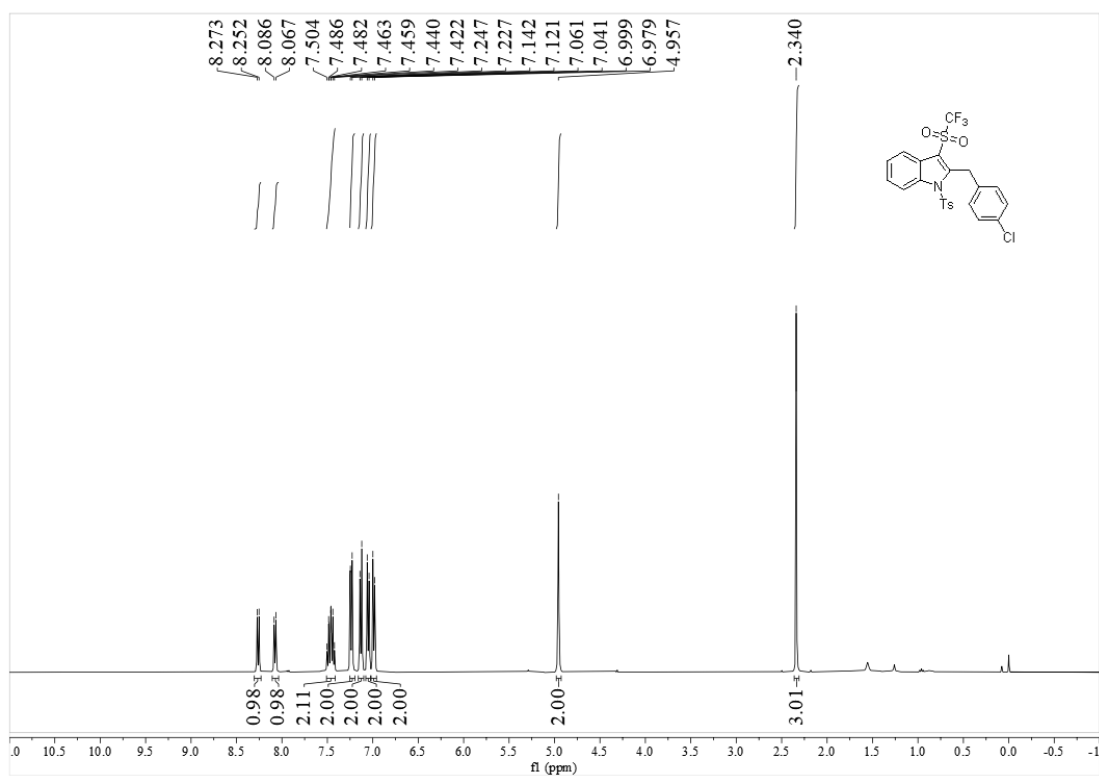

<sup>13</sup>C NMR (100 MHz, CDCl<sub>3</sub>) spectroscopy of **5j**

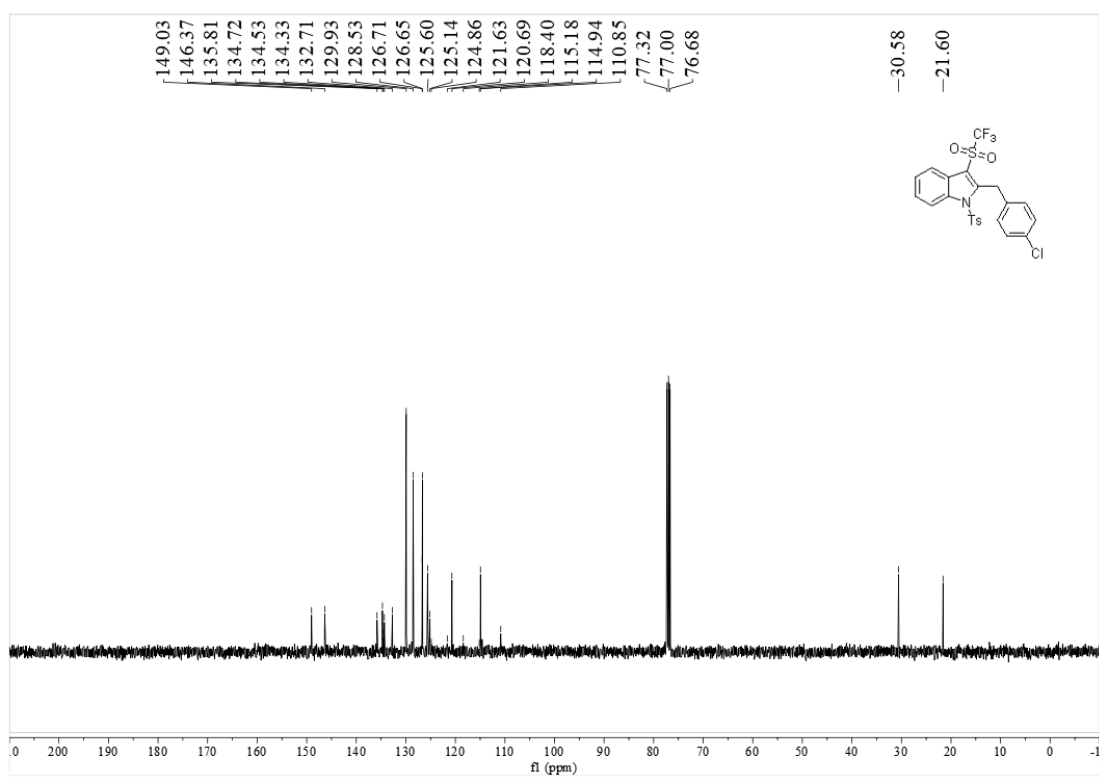



<sup>19</sup>F NMR (376 MHz, CDCl<sub>3</sub>) spectroscopy of **5j**

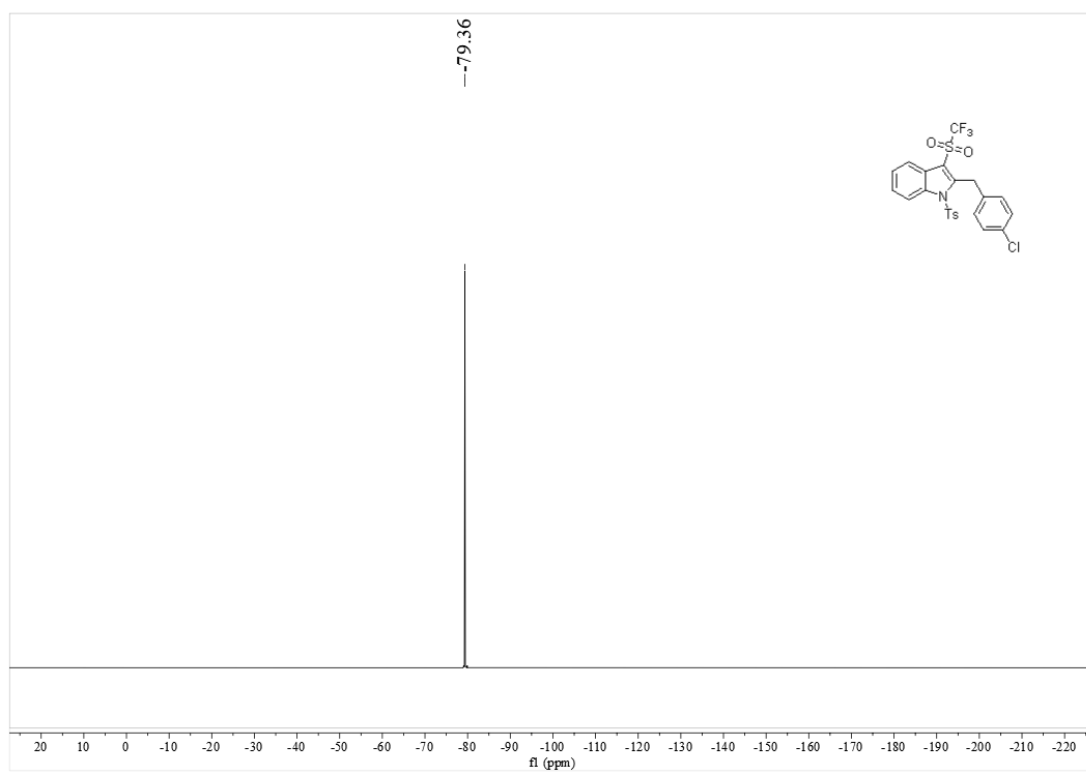

<sup>1</sup>H NMR (400 MHz, CDCl<sub>3</sub>) spectroscopy of **5k**

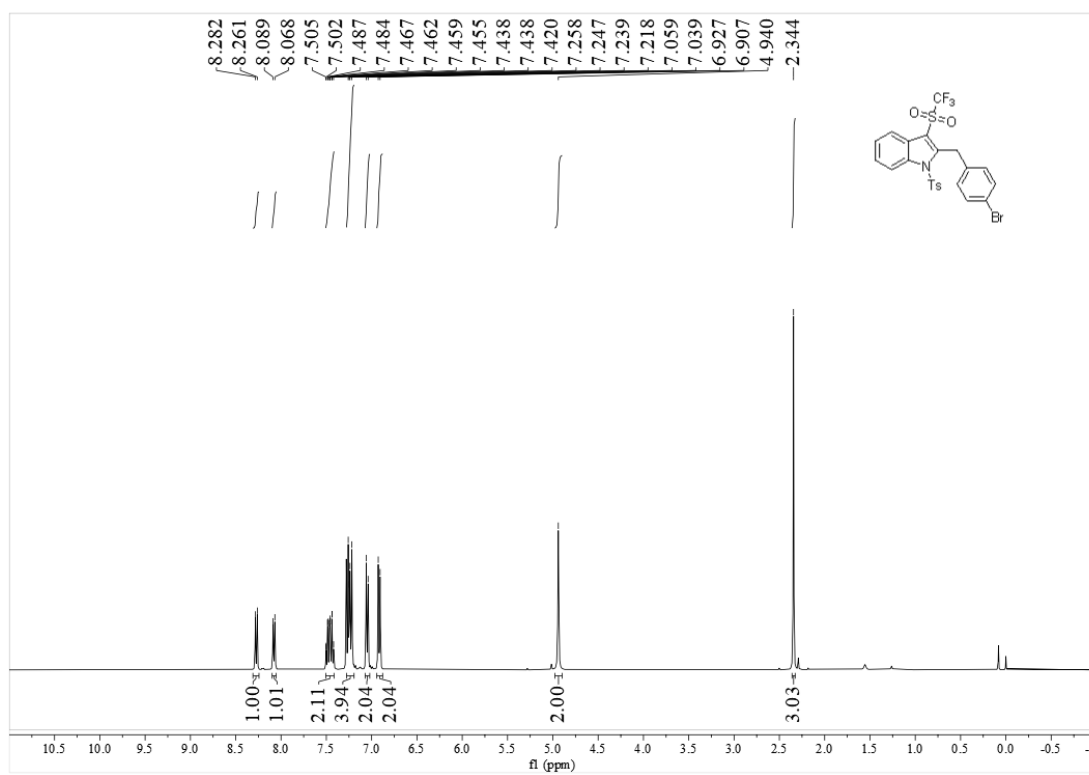

<sup>13</sup>C NMR (100 MHz, CDCl<sub>3</sub>) spectroscopy of **5k**

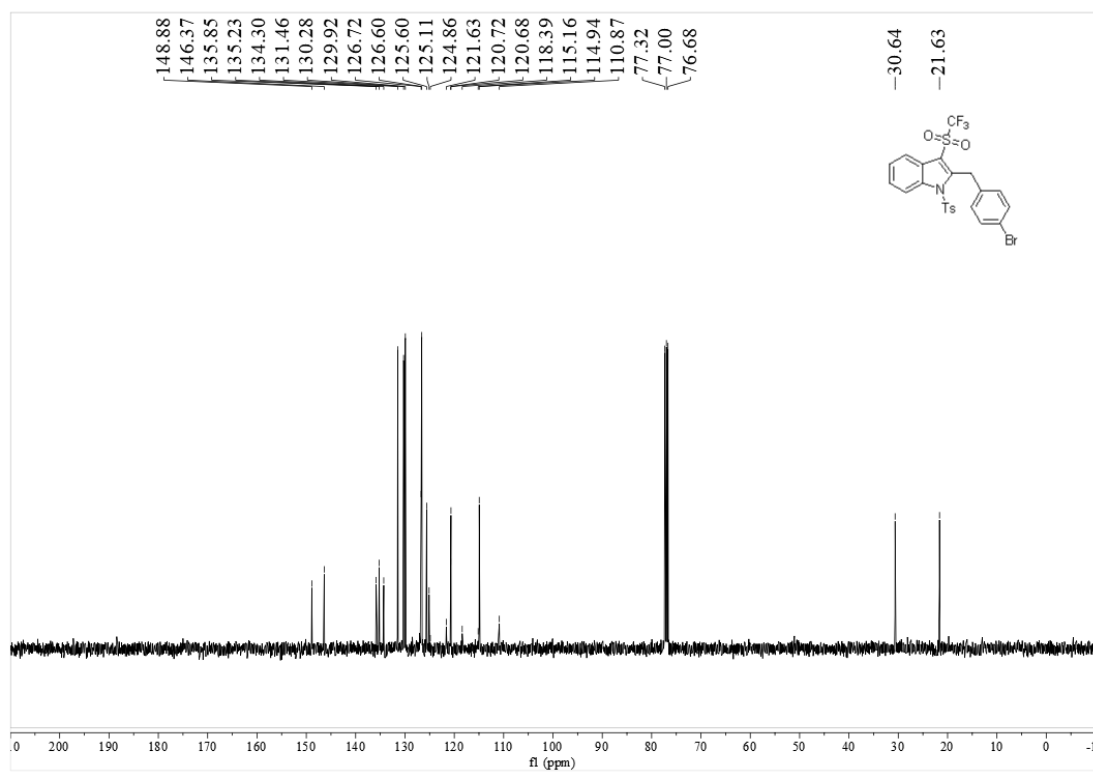

<sup>19</sup>F NMR (376 MHz, CDCl<sub>3</sub>) spectroscopy of **5k**

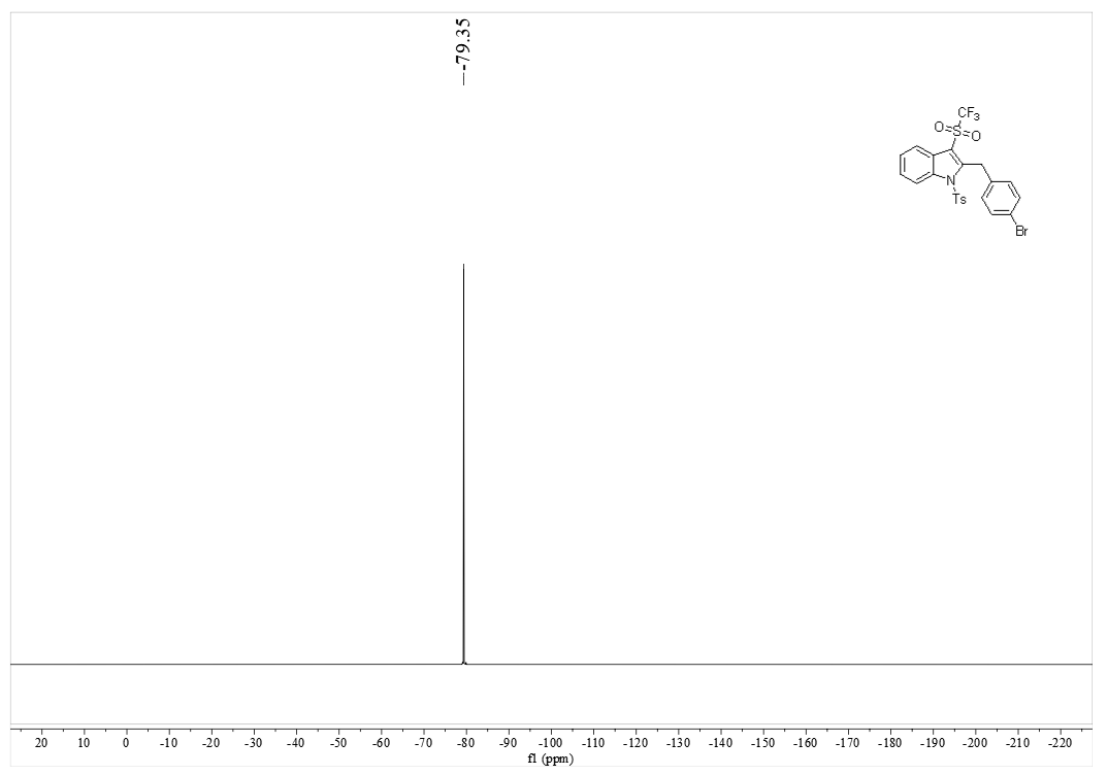

<sup>1</sup>H NMR (400 MHz, CDCl<sub>3</sub>) spectroscopy of **51**

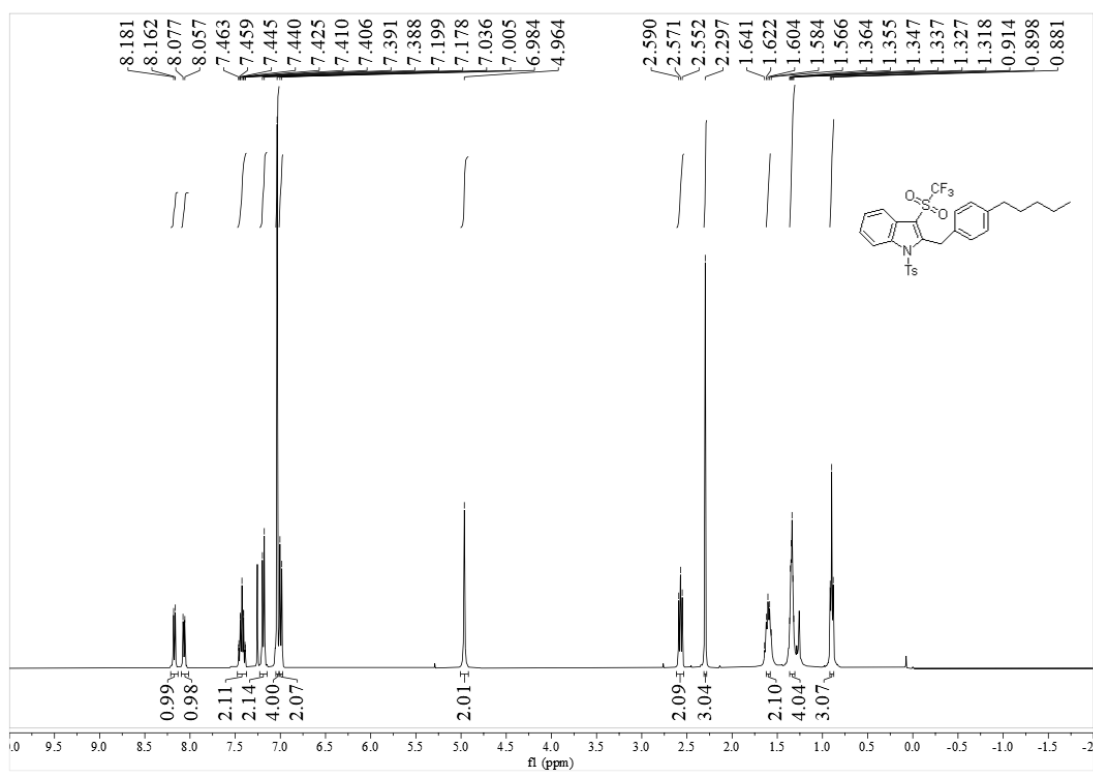

<sup>13</sup>C NMR (100 MHz, CDCl<sub>3</sub>) spectroscopy of **51**

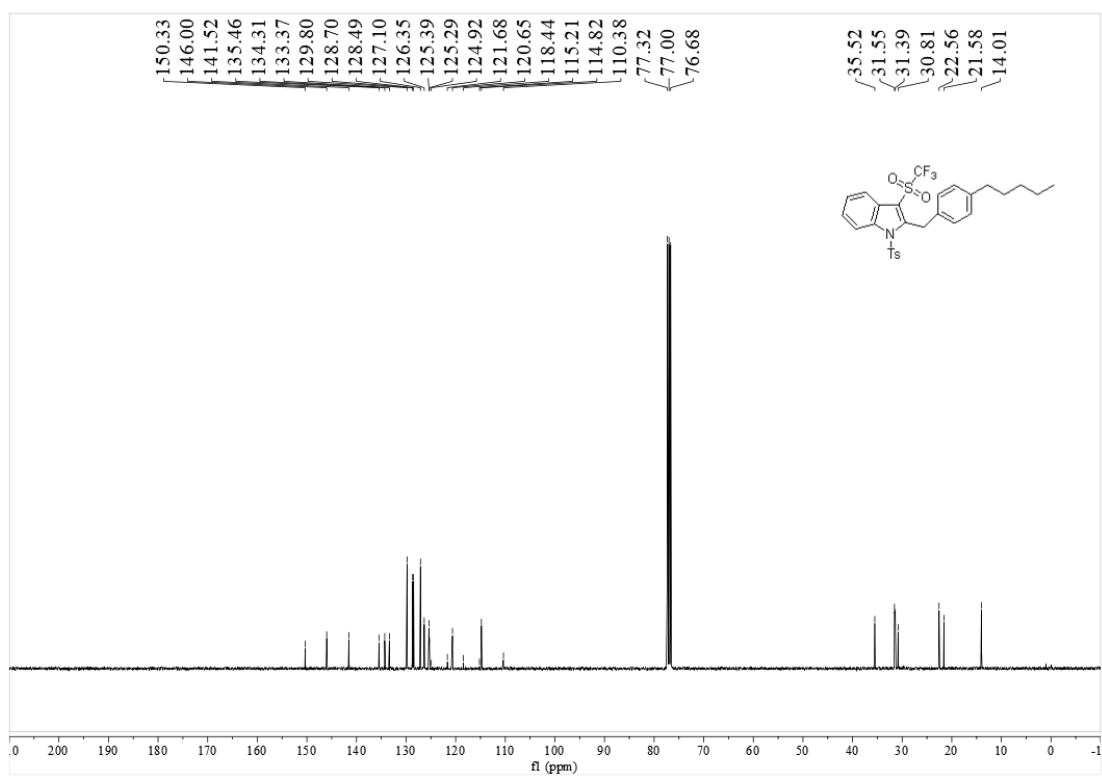

**<sup>19</sup>F NMR (376 MHz, CDCl<sub>3</sub>) spectroscopy of 5l**

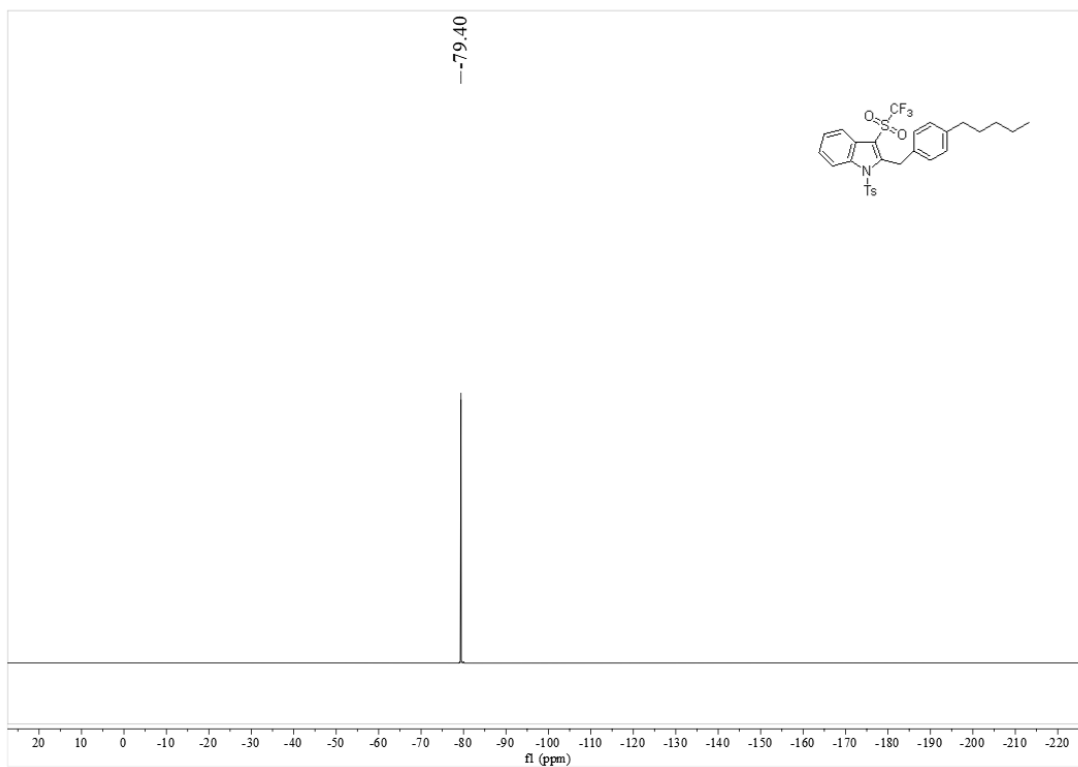

**<sup>1</sup>H NMR (400 MHz, CDCl<sub>3</sub>) spectroscopy of 5m**

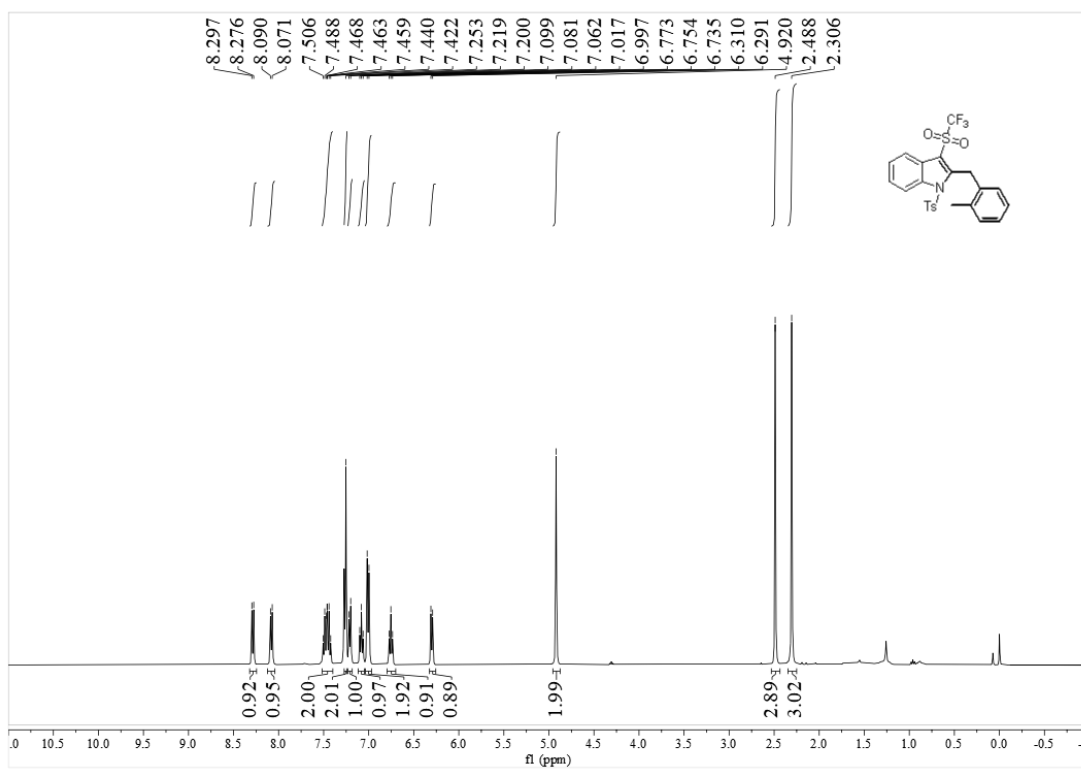

$^{13}\text{C}$  NMR (100 MHz,  $\text{CDCl}_3$ ) spectroscopy of **5m**

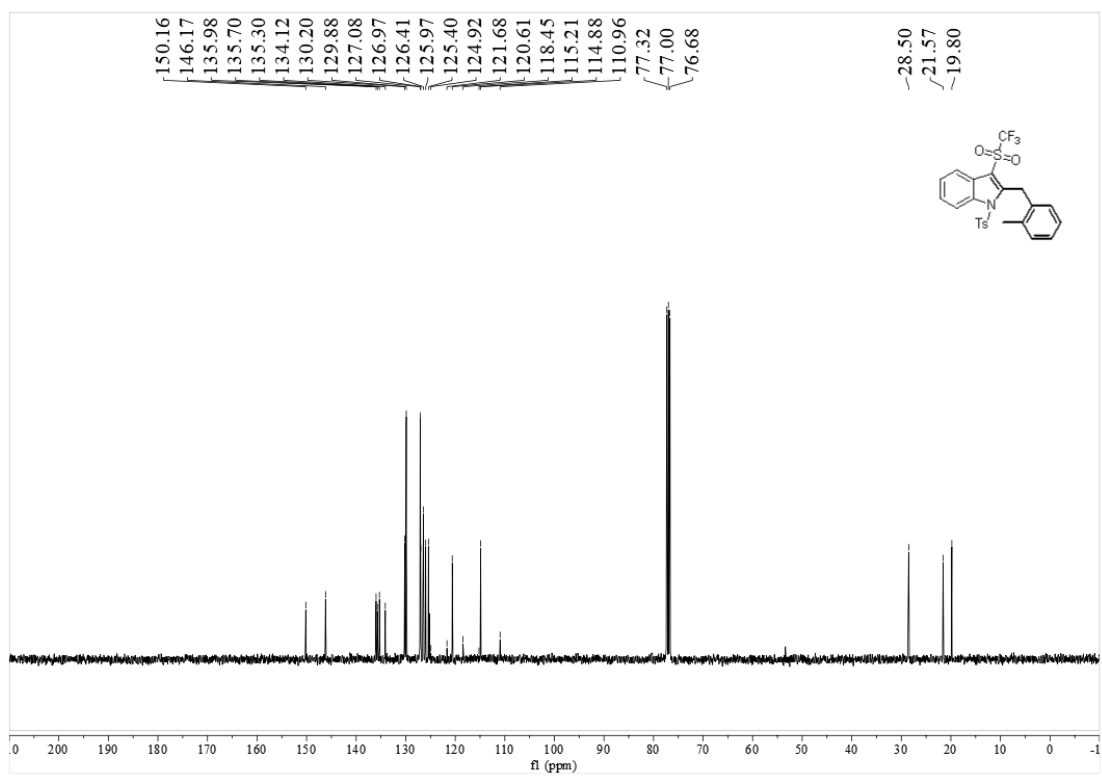

$^{19}\text{F}$  NMR (376 MHz,  $\text{CDCl}_3$ ) spectroscopy of **5m**

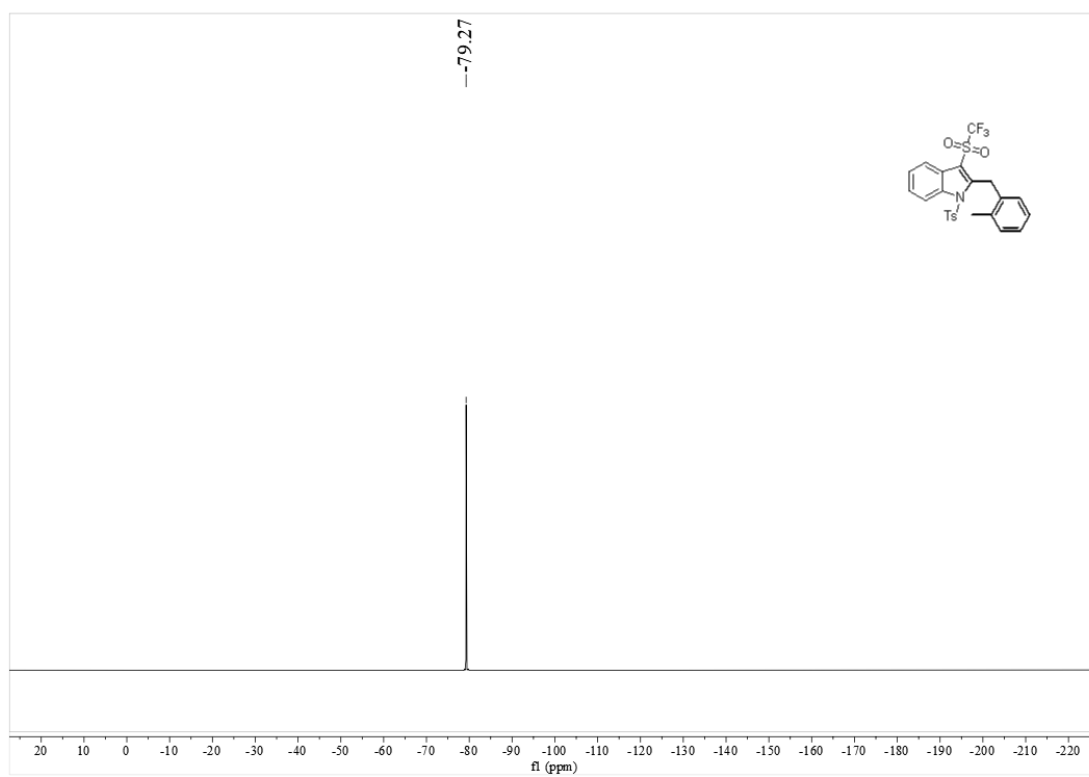

<sup>1</sup>H NMR (400 MHz, CDCl<sub>3</sub>) spectroscopy of **5n**

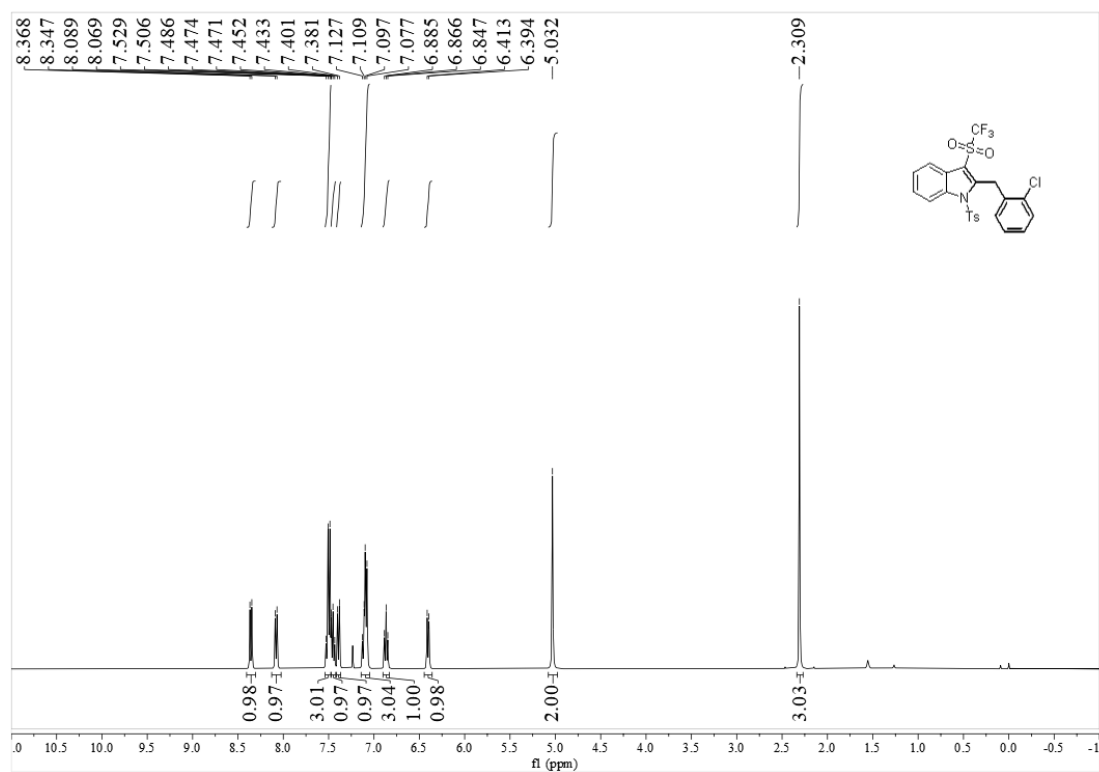

<sup>13</sup>C NMR (100 MHz, CDCl<sub>3</sub>) spectroscopy of **5n**

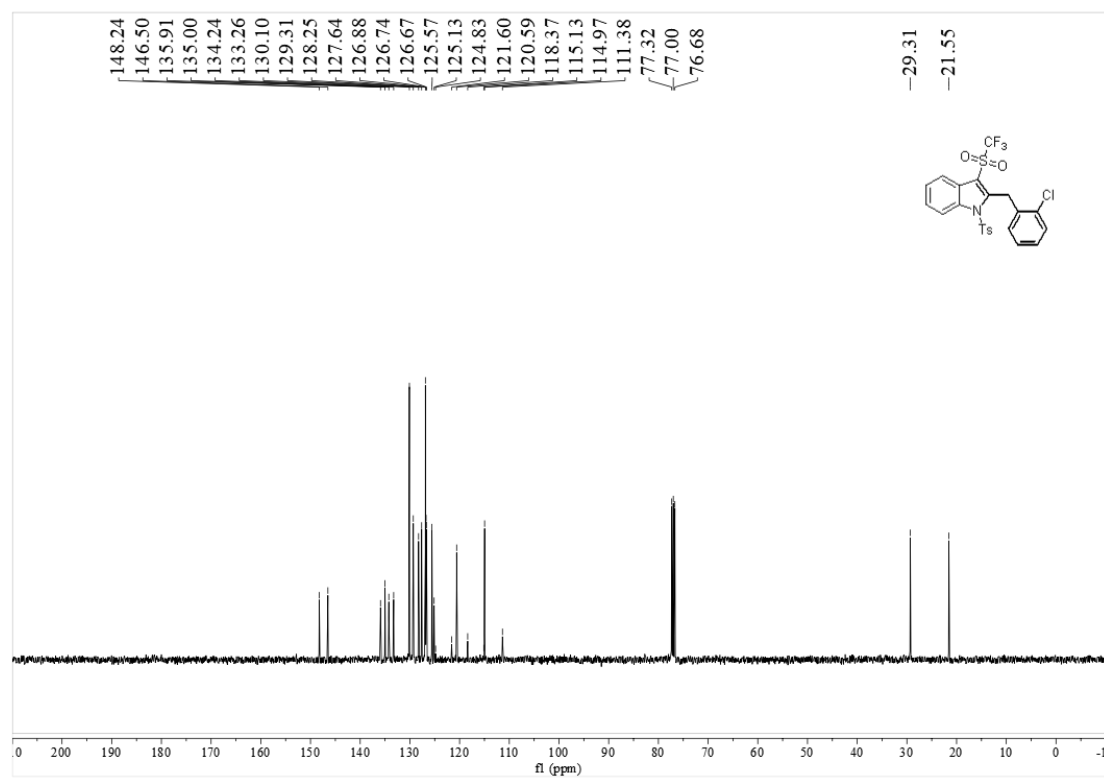

**<sup>19</sup>F NMR (376 MHz, CDCl<sub>3</sub>) spectroscopy of 5n**

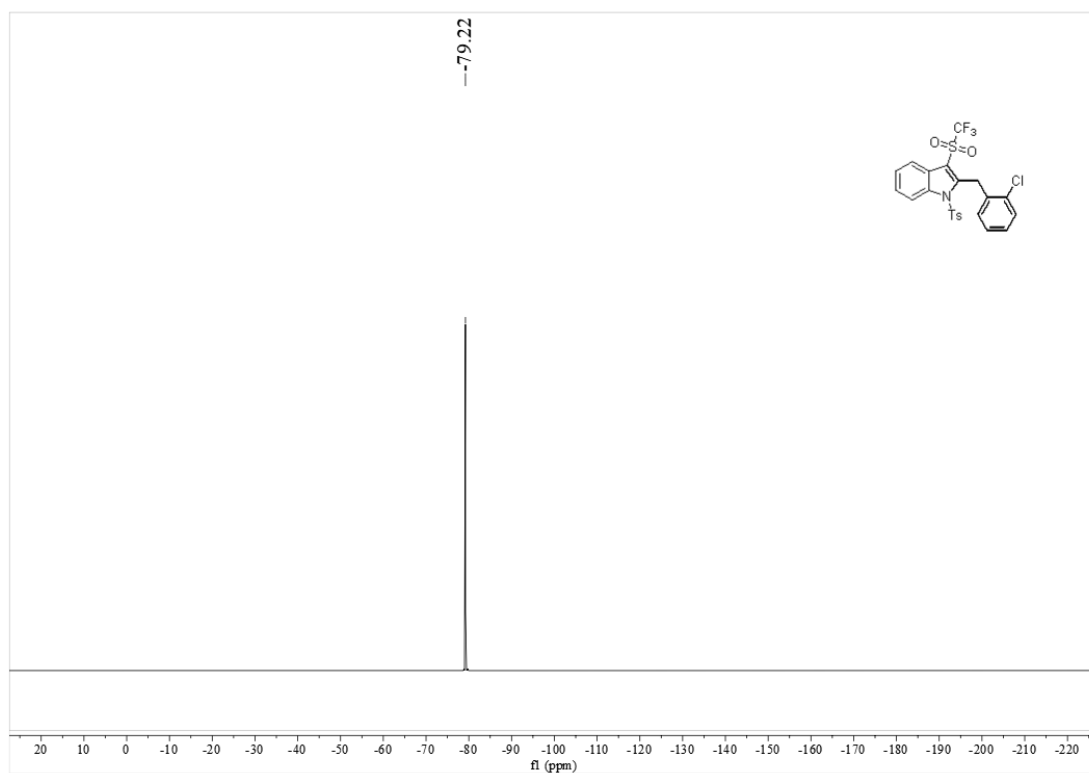

**<sup>1</sup>H NMR (400 MHz, CDCl<sub>3</sub>) spectroscopy of 5o**

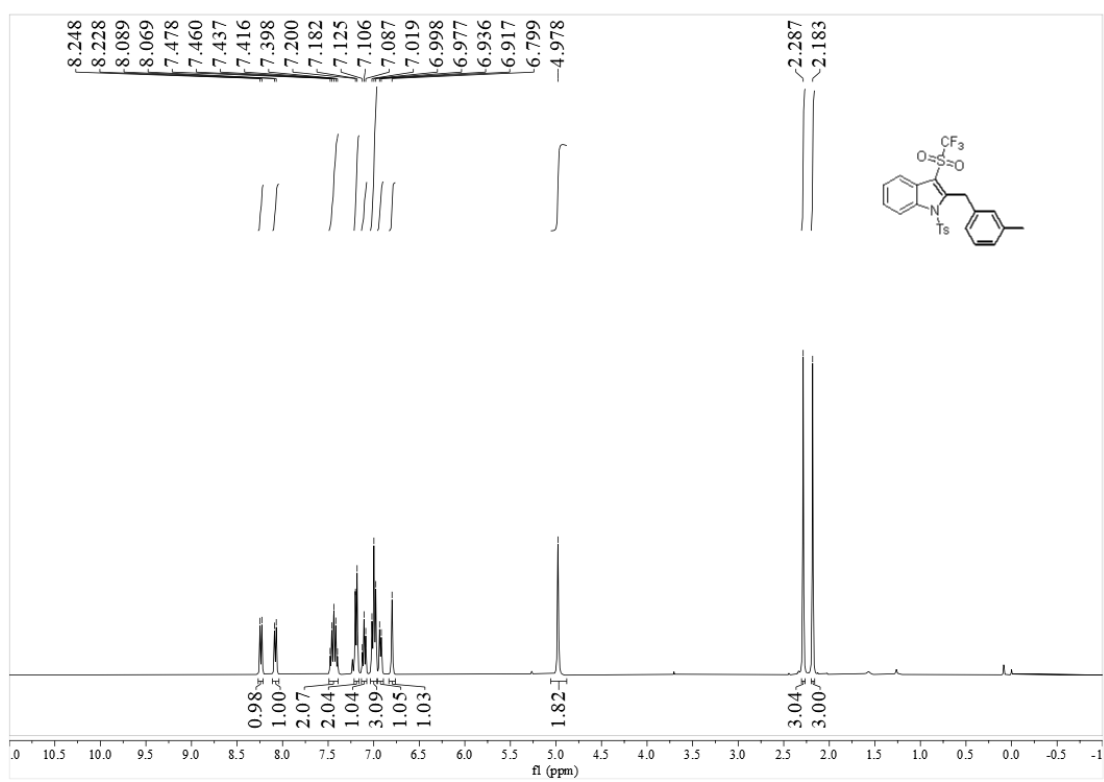

<sup>13</sup>C NMR (100 MHz, CDCl<sub>3</sub>) spectroscopy of **5o**

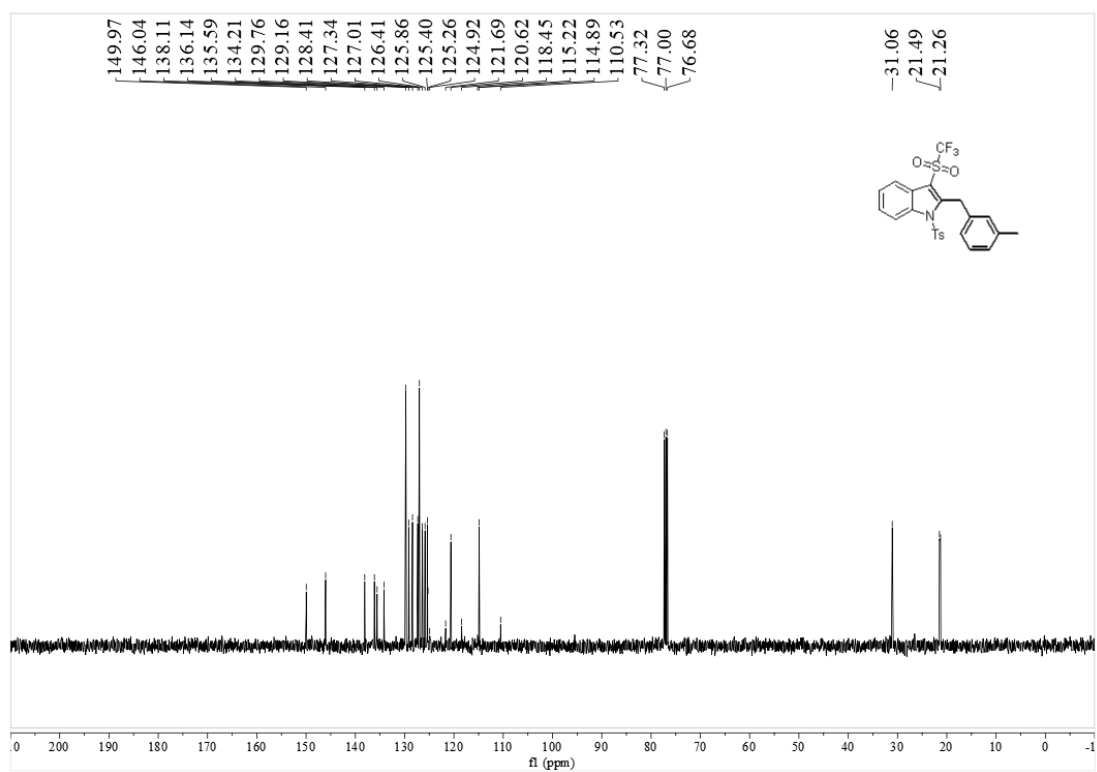

<sup>19</sup>F NMR (376 MHz, CDCl<sub>3</sub>) spectroscopy of **5o**

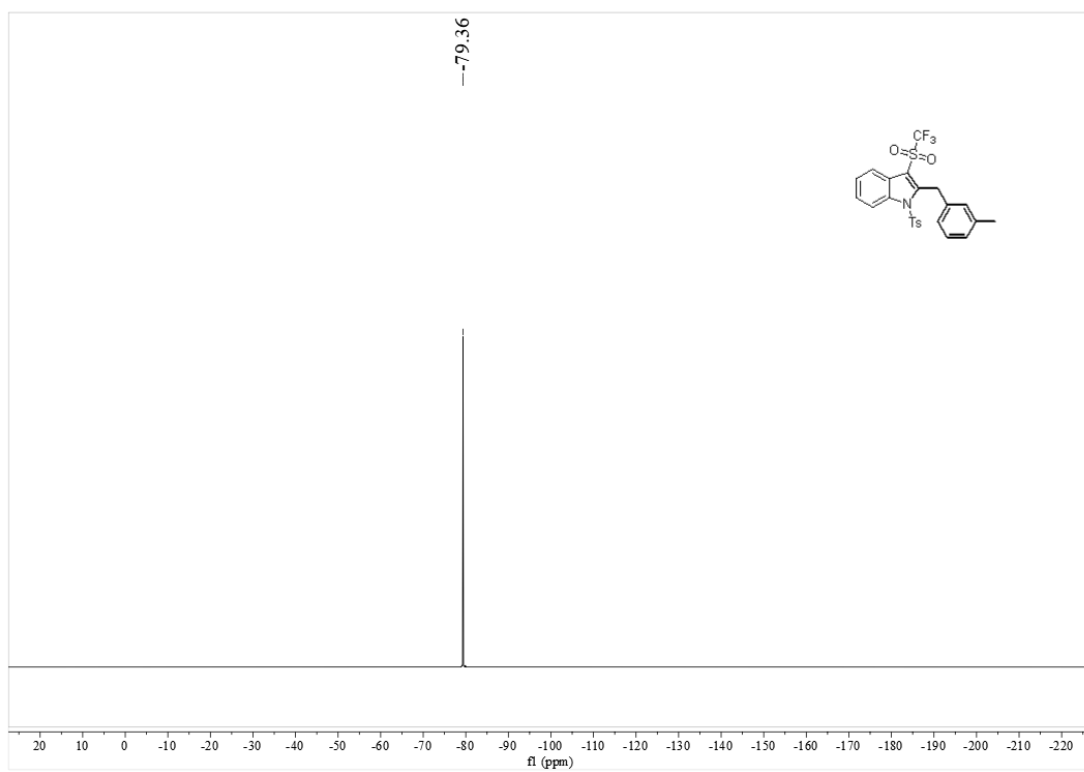



<sup>1</sup>H NMR (400 MHz, CDCl<sub>3</sub>) spectroscopy of **5p**

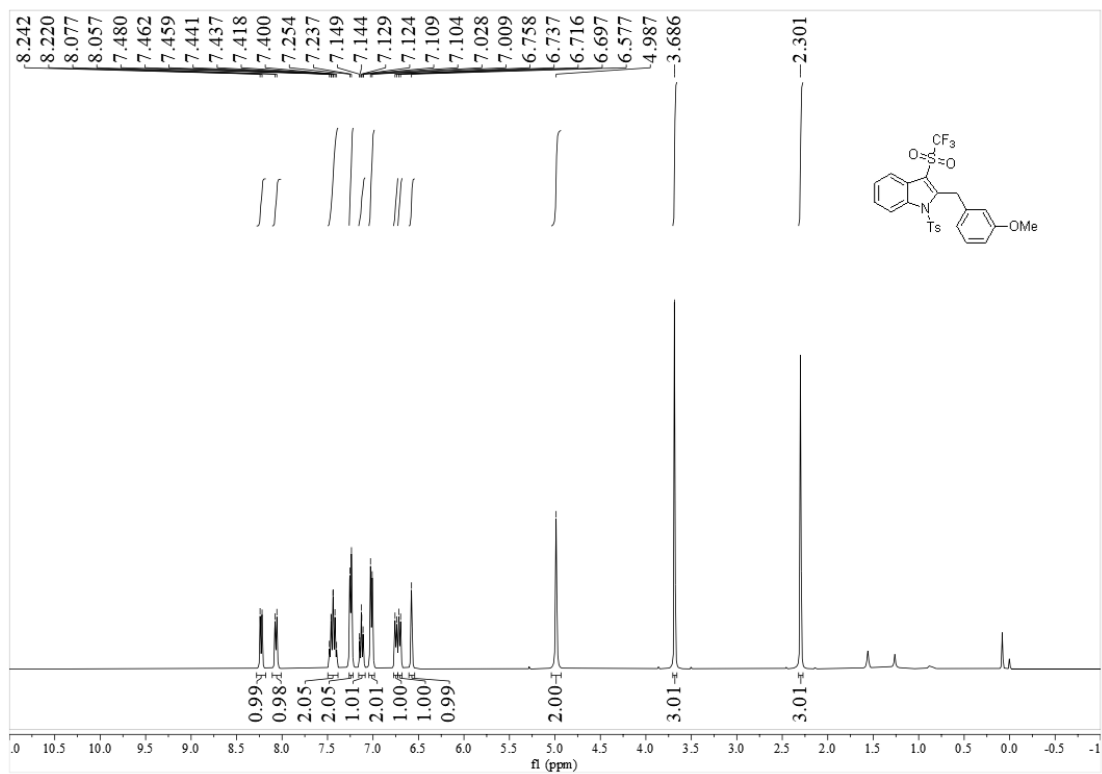

<sup>13</sup>C NMR (100 MHz, CDCl<sub>3</sub>) spectroscopy of **5p**

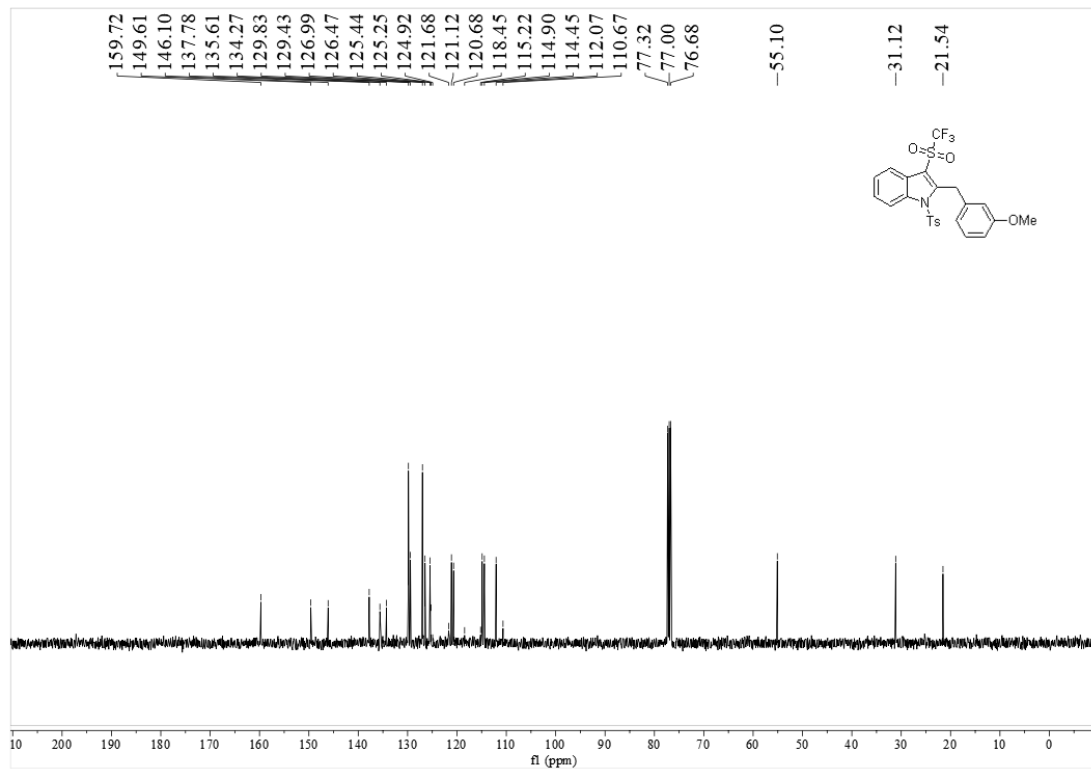

**<sup>19</sup>F NMR (376 MHz, CDCl<sub>3</sub>) spectroscopy of 5p**

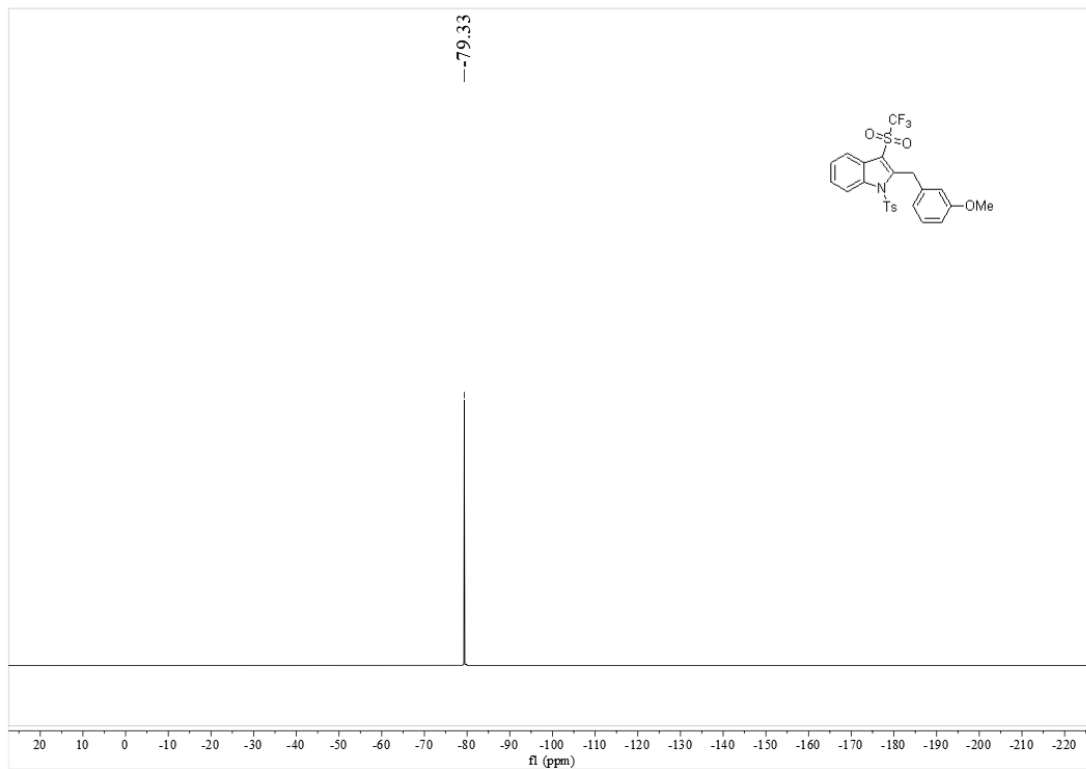

**<sup>1</sup>H NMR (400 MHz, CDCl<sub>3</sub>) spectroscopy of 5q**

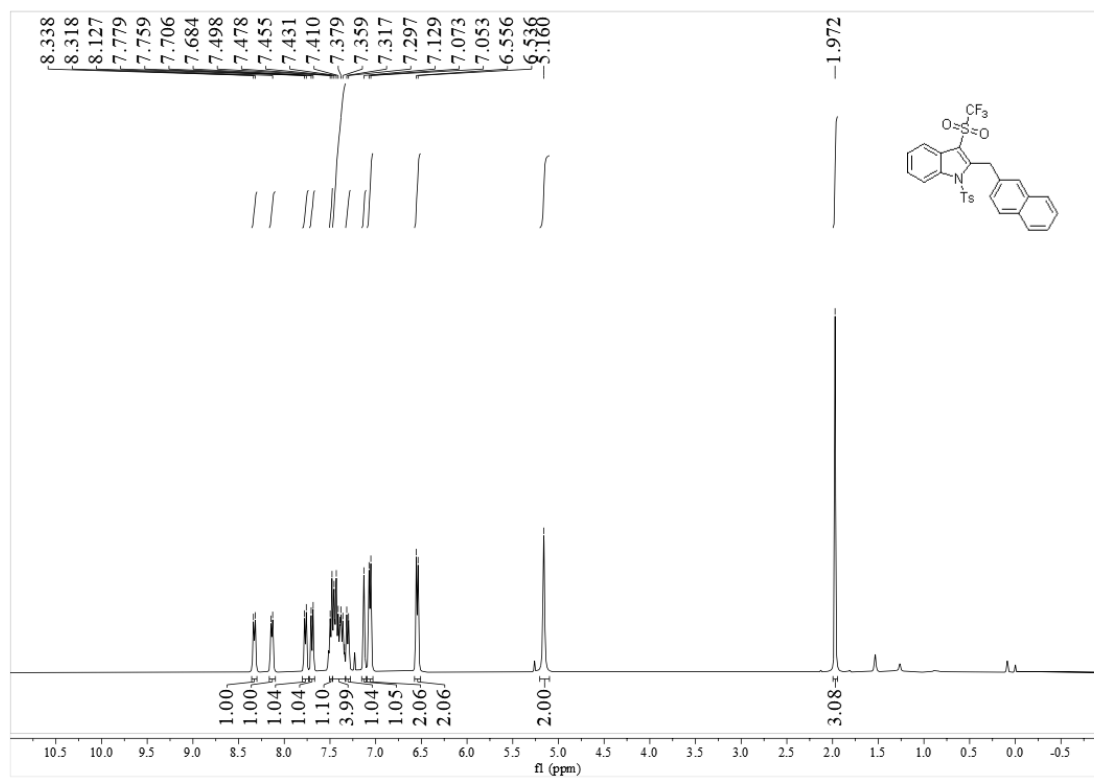

<sup>13</sup>C NMR (100 MHz, CDCl<sub>3</sub>) spectroscopy of **5q**

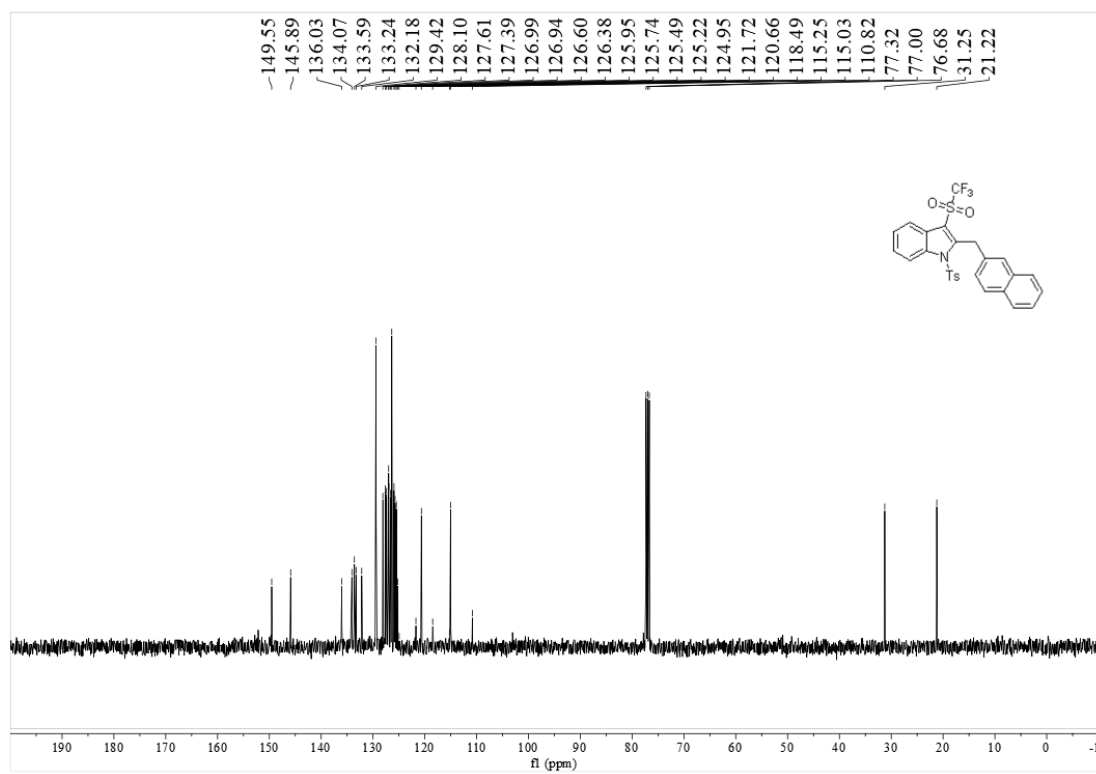

<sup>19</sup>F NMR (376 MHz, CDCl<sub>3</sub>) spectroscopy of **5q**

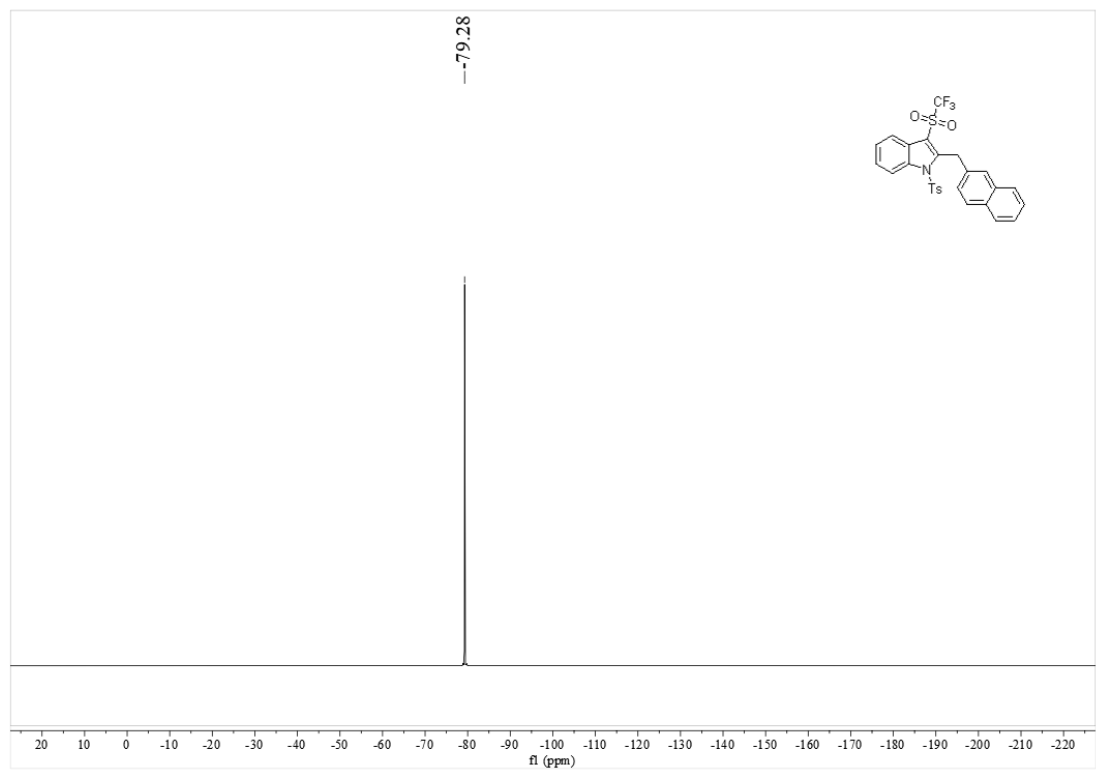

<sup>1</sup>H NMR (400 MHz, CDCl<sub>3</sub>) spectroscopy of **5r**

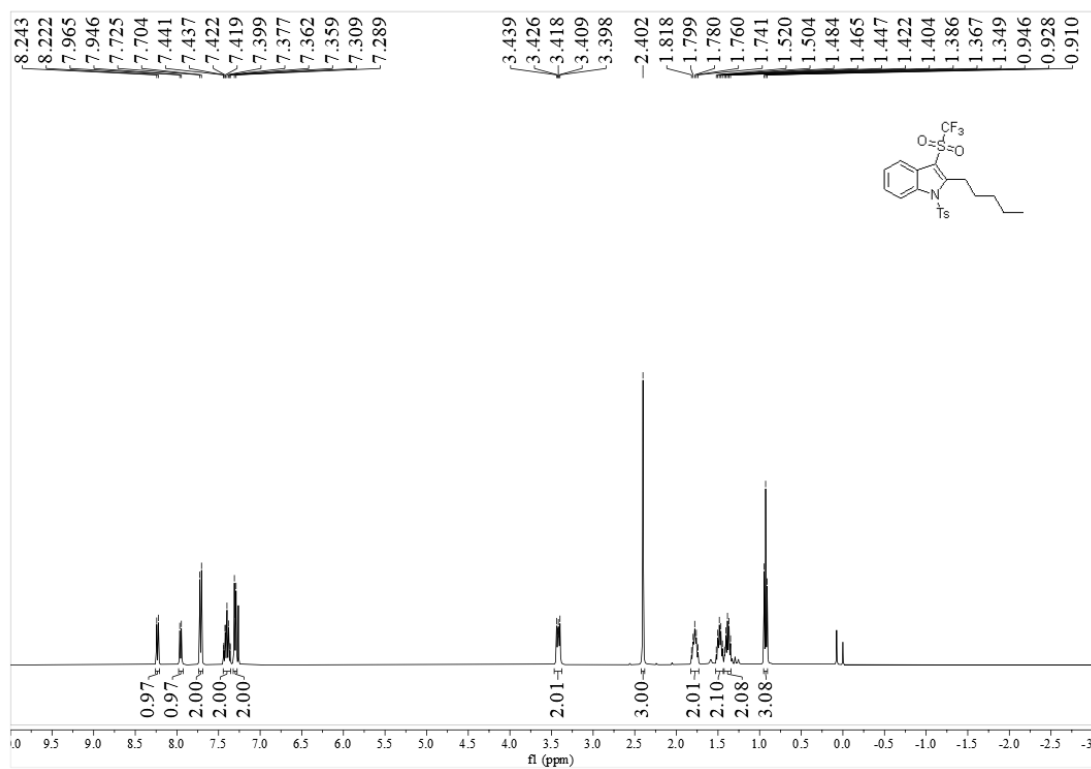

<sup>13</sup>C NMR (100 MHz, CDCl<sub>3</sub>) spectroscopy of **5r**

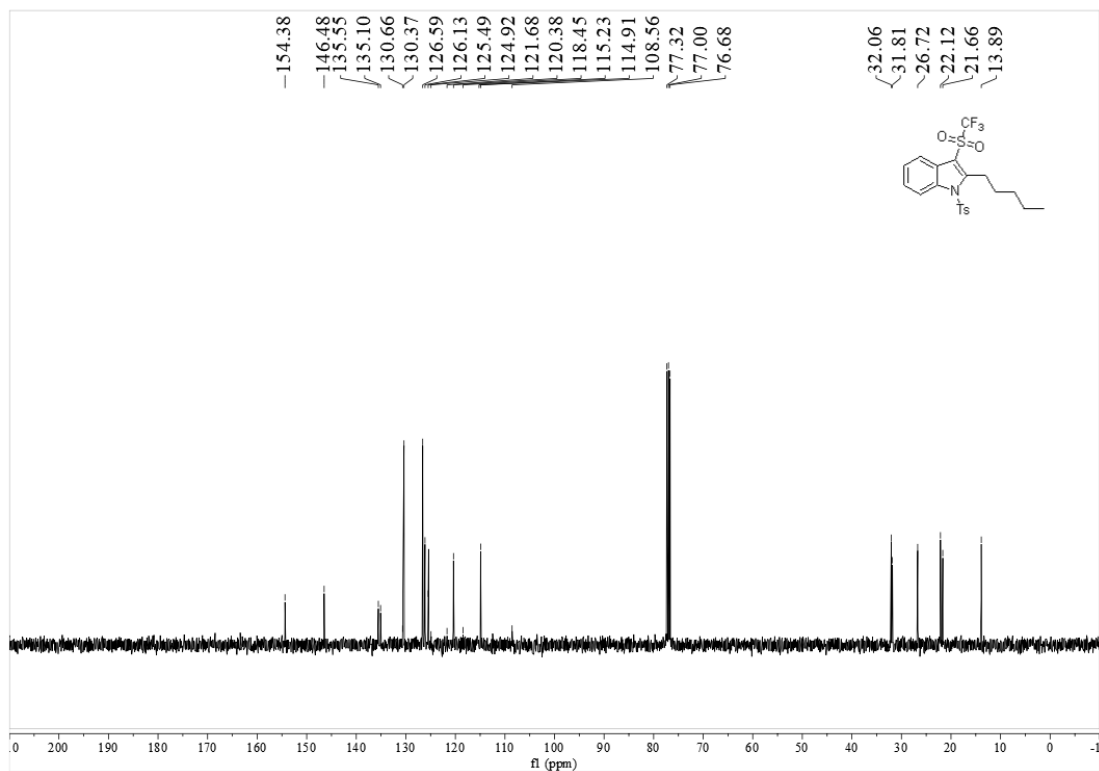

**<sup>19</sup>F NMR (376 MHz, CDCl<sub>3</sub>) spectroscopy of 5r**

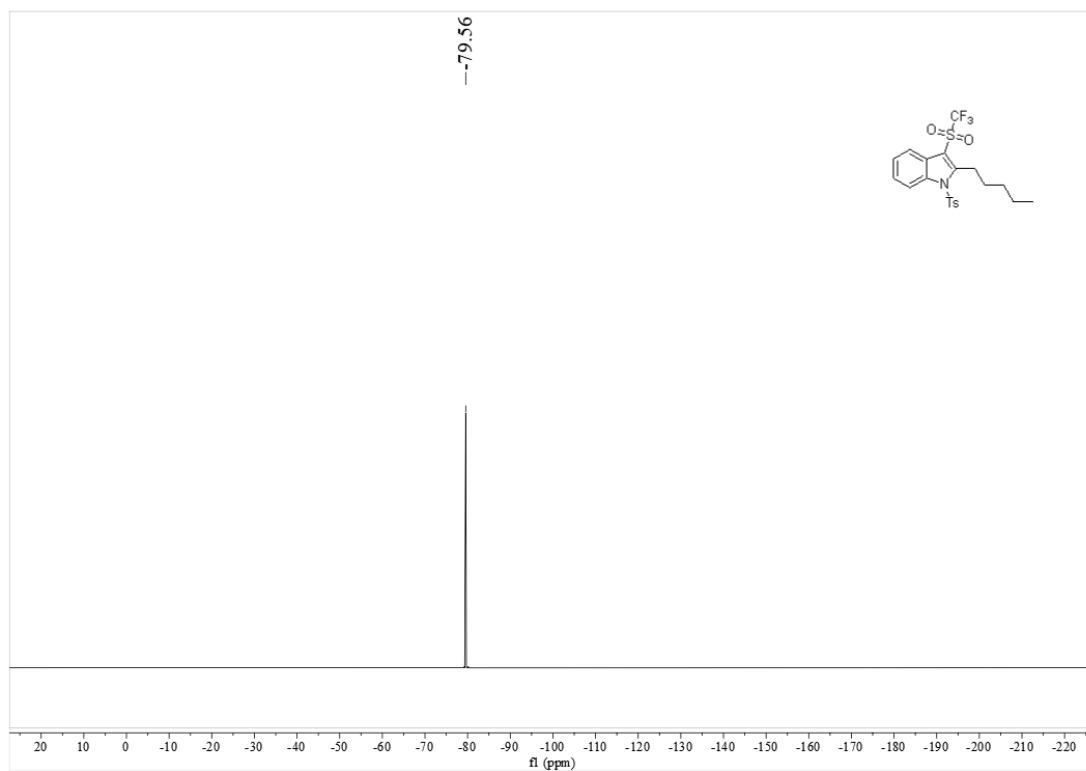

**<sup>1</sup>H NMR (400 MHz, CDCl<sub>3</sub>) spectroscopy of 5s**

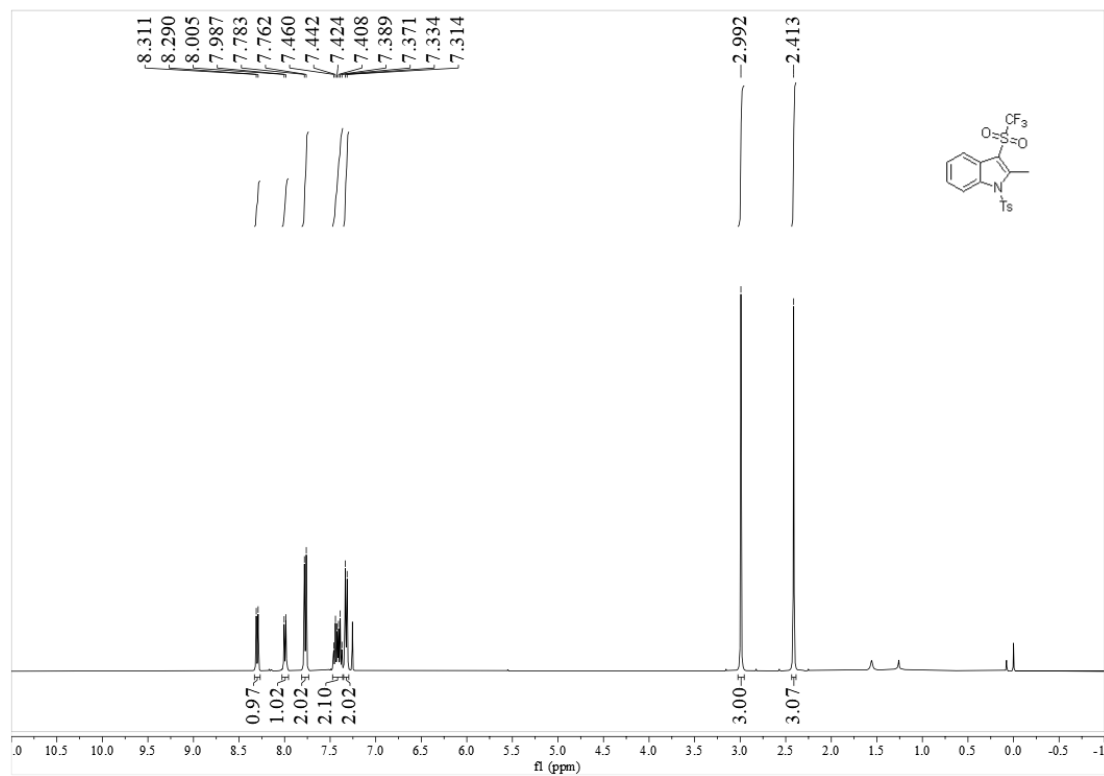

<sup>13</sup>C NMR (100 MHz, CDCl<sub>3</sub>) spectroscopy of **5s**

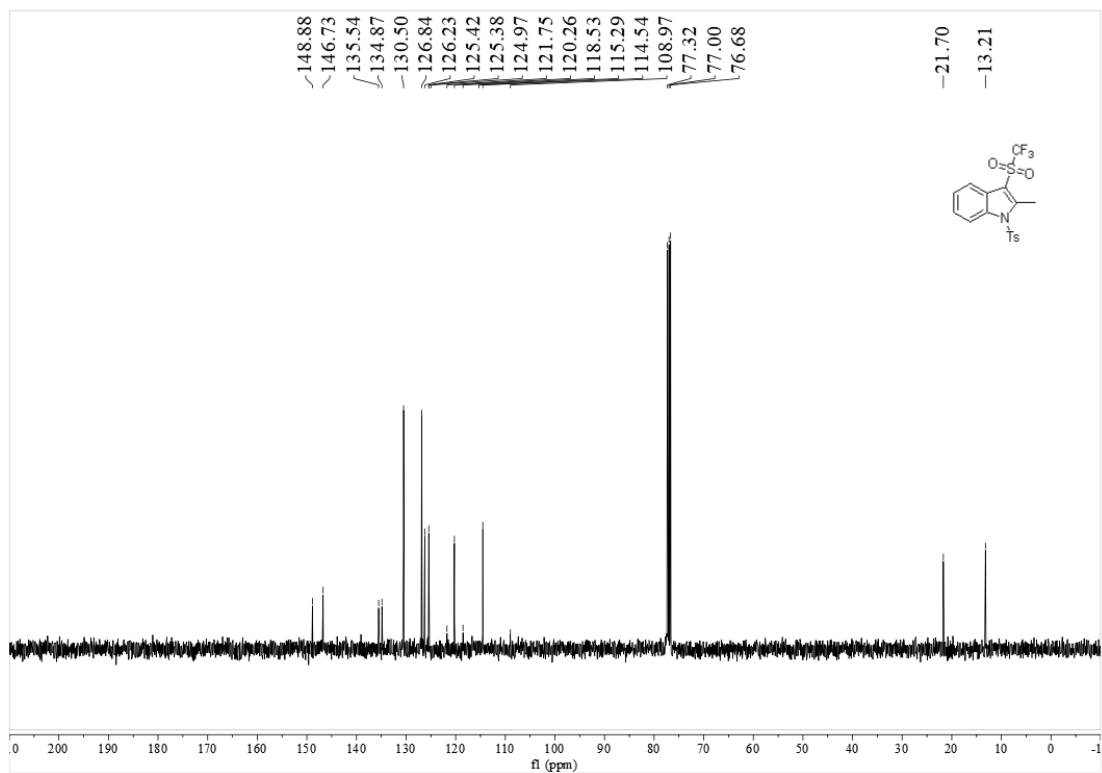

<sup>19</sup>F NMR (376 MHz, CDCl<sub>3</sub>) spectroscopy of **5s**

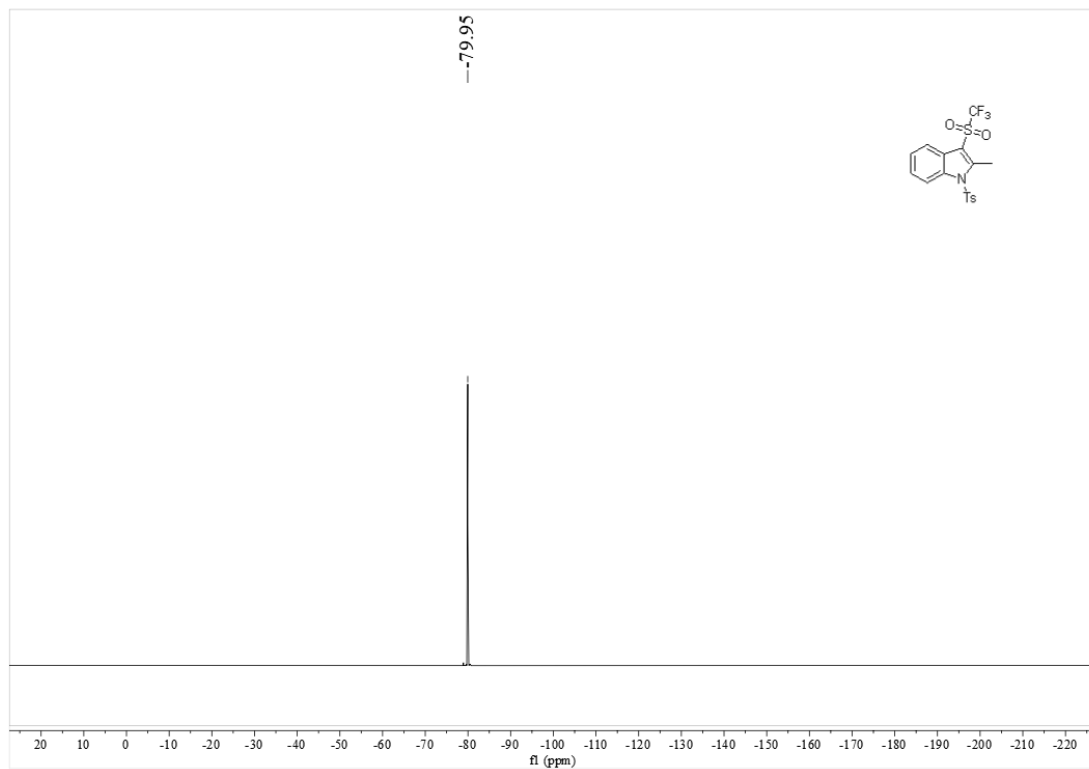

**<sup>1</sup>H NMR (400 MHz, CDCl<sub>3</sub>) spectroscopy of 5t**

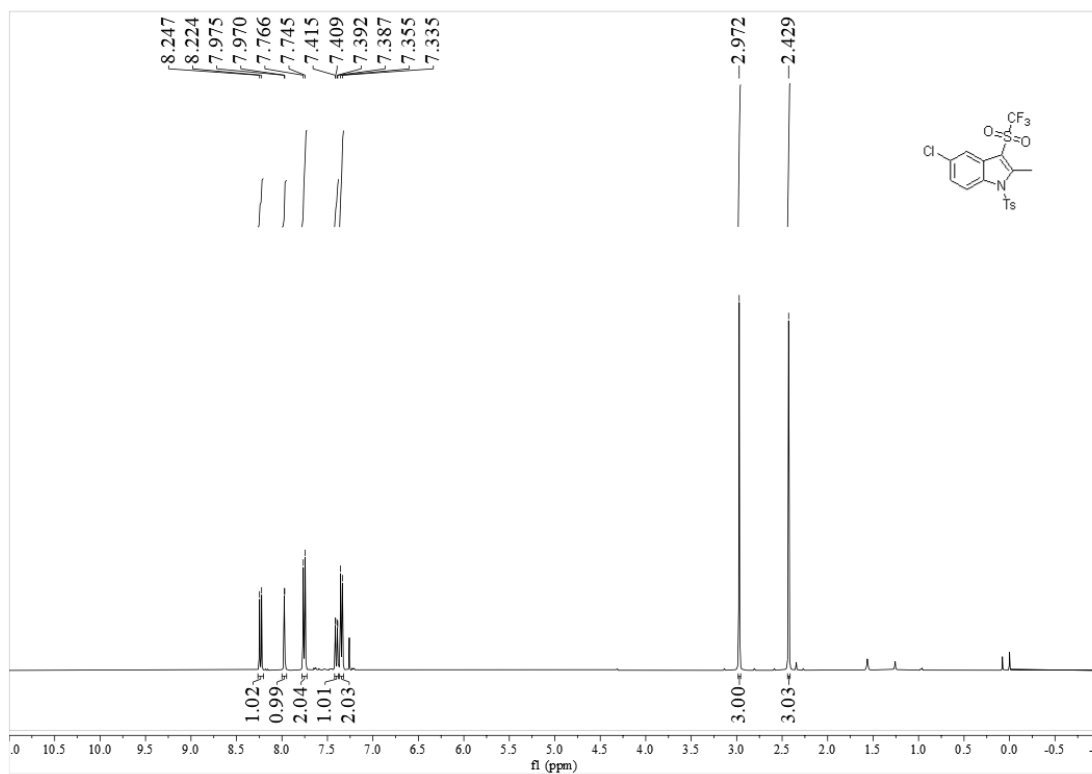

**<sup>13</sup>C NMR (100 MHz, CDCl<sub>3</sub>) spectroscopy of 5t**

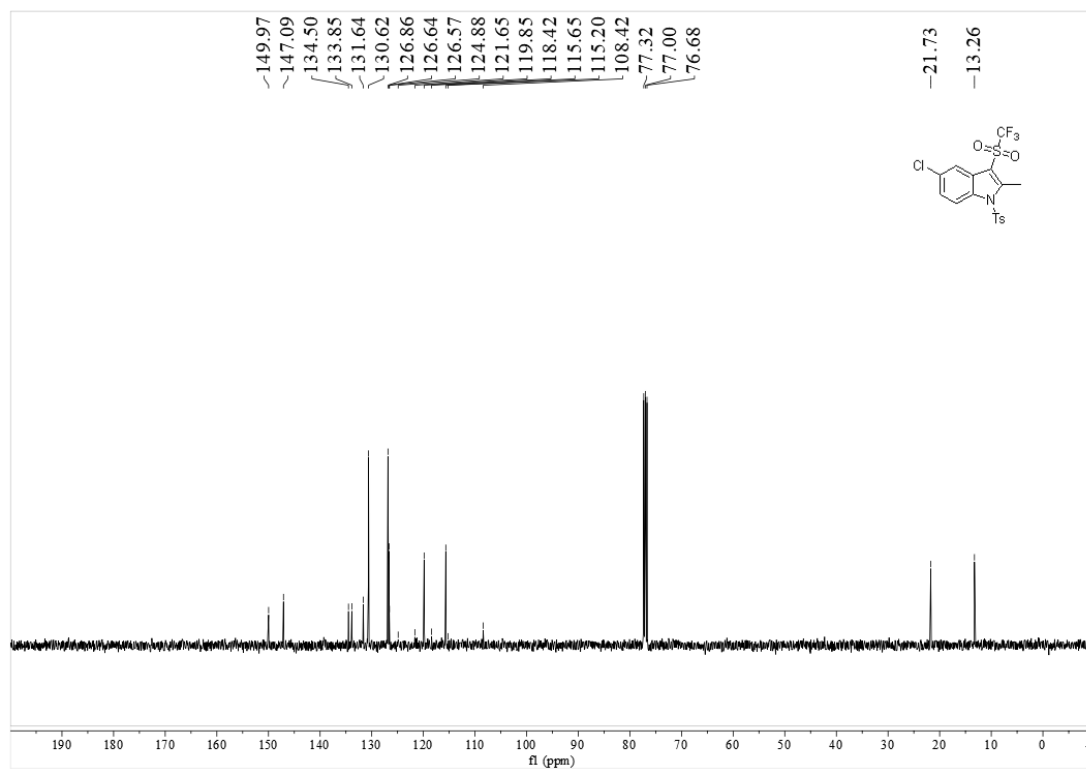

<sup>19</sup>F NMR (376 MHz, CDCl<sub>3</sub>) spectroscopy of **5t**

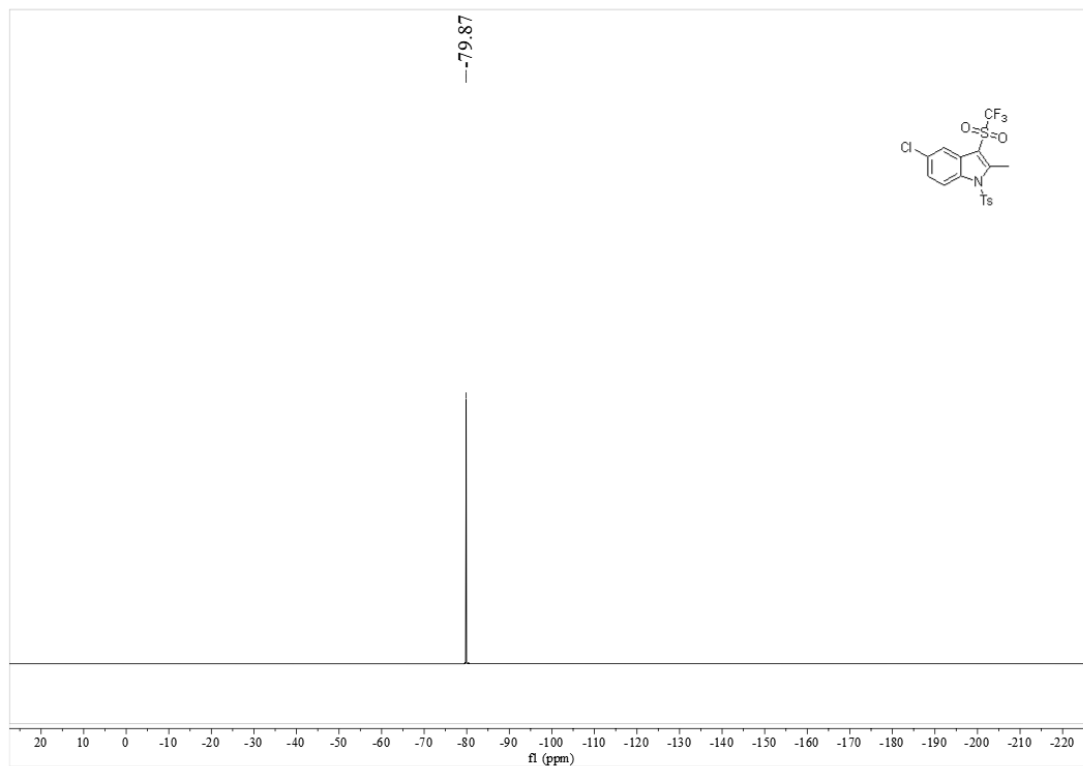

<sup>1</sup>H NMR (400 MHz, CDCl<sub>3</sub>) spectroscopy of **5u**

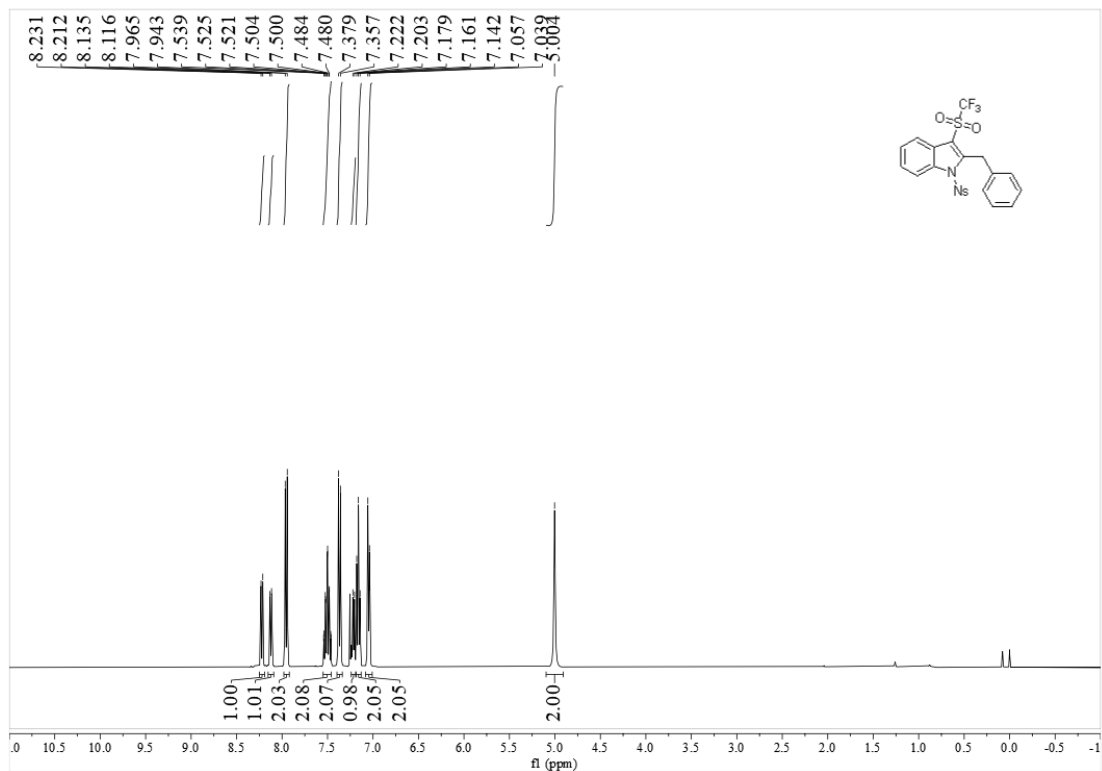



<sup>13</sup>C NMR (100 MHz, CDCl<sub>3</sub>) spectroscopy of **5u**

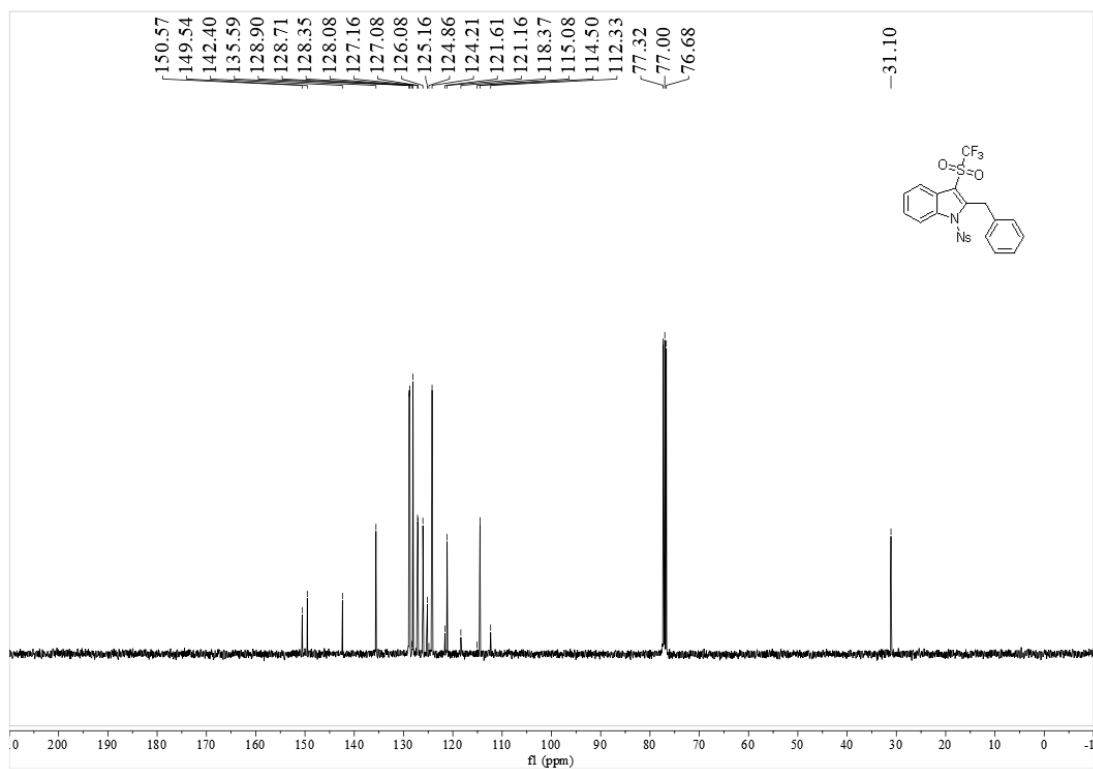

<sup>19</sup>F NMR (376 MHz, CDCl<sub>3</sub>) spectroscopy of **5u**

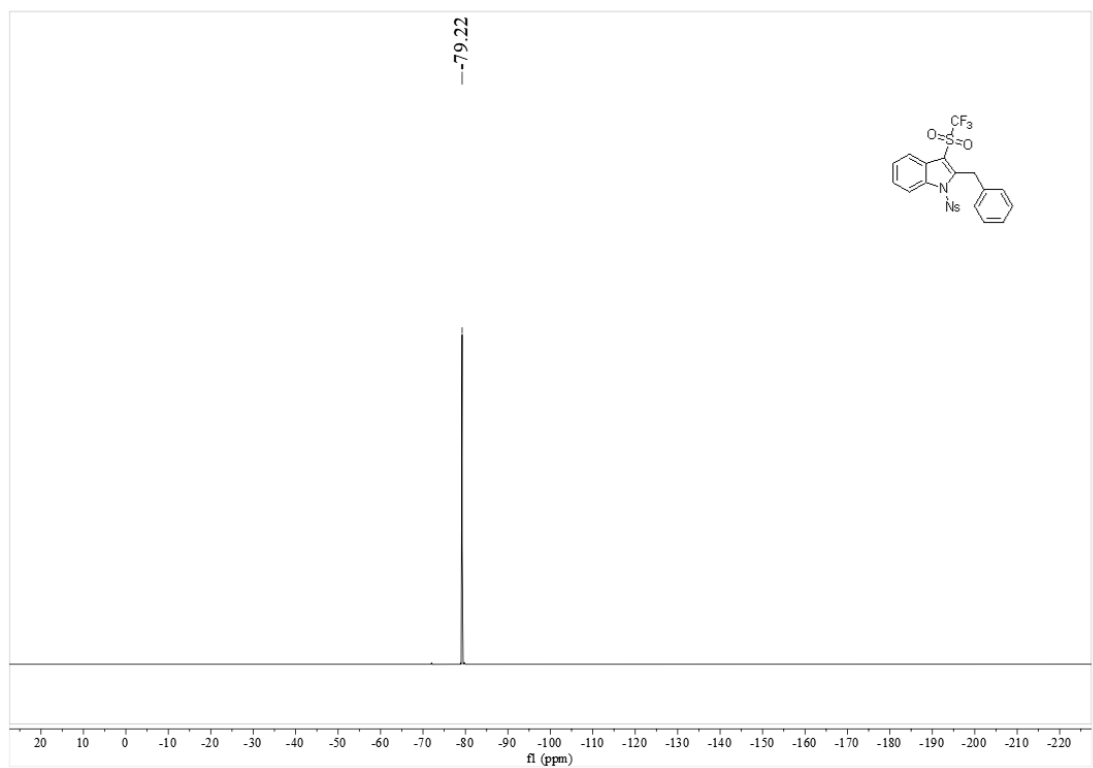

<sup>1</sup>H NMR (400 MHz, CDCl<sub>3</sub>) spectroscopy of **5v**

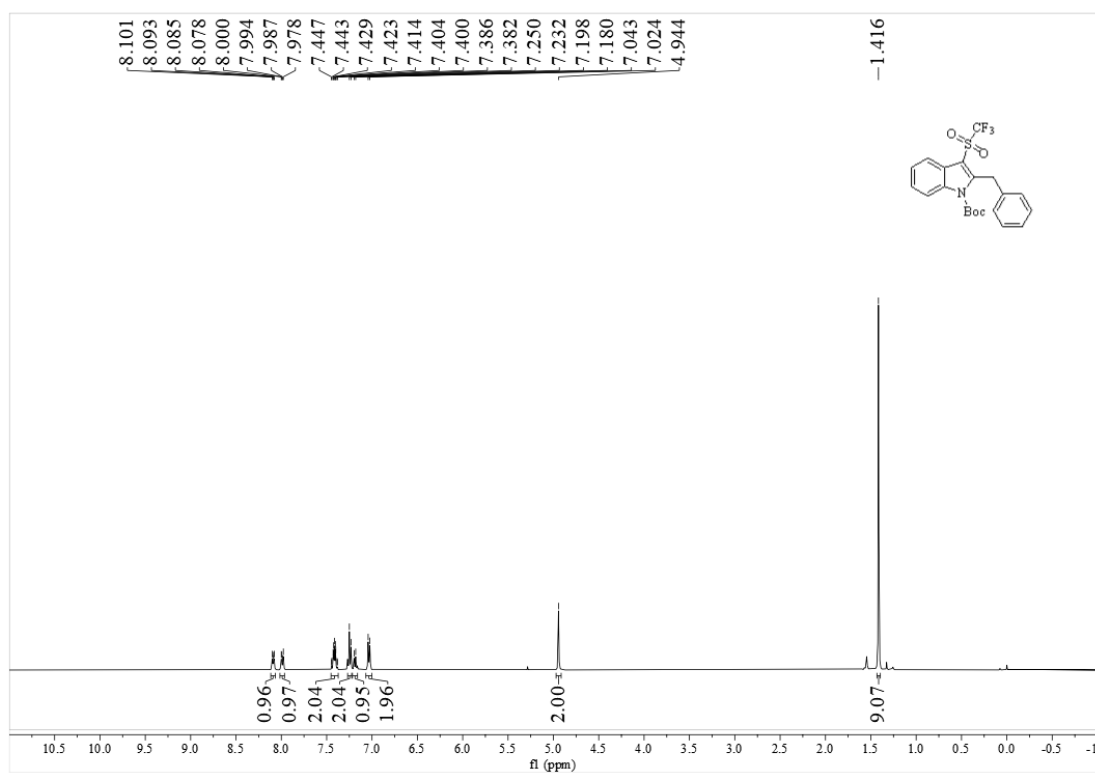

<sup>13</sup>C NMR (100 MHz, CDCl<sub>3</sub>) spectroscopy of **5v**

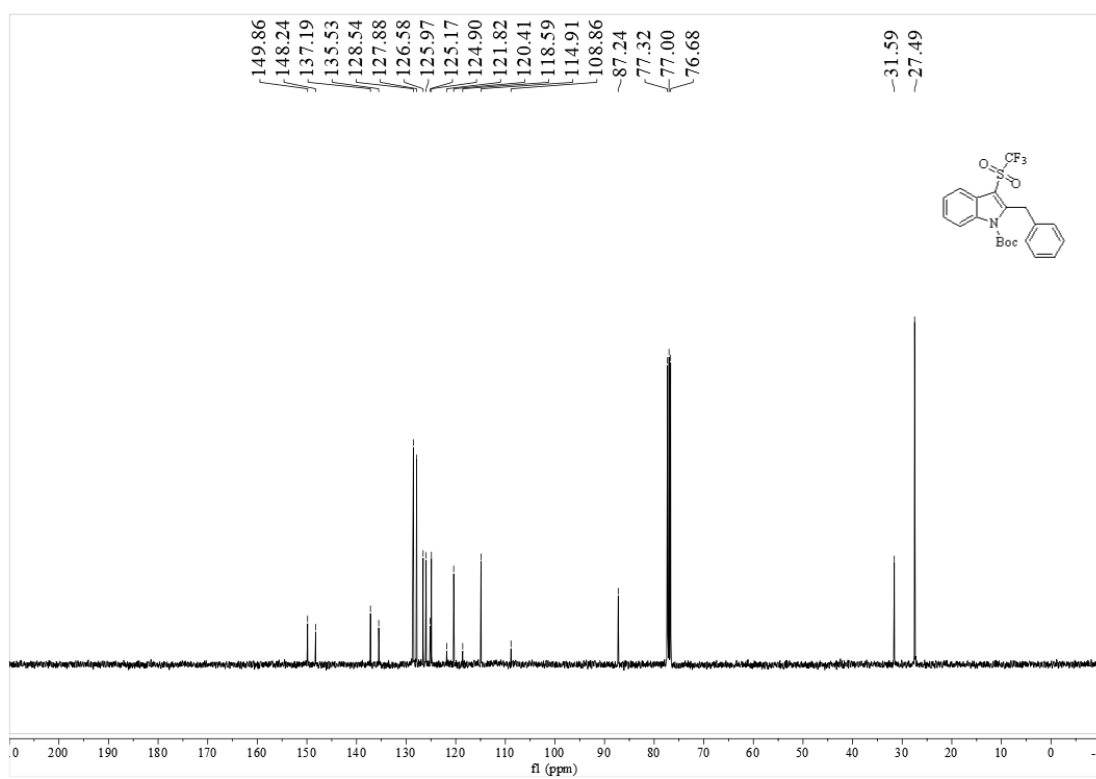

<sup>19</sup>F NMR (376 MHz, CDCl<sub>3</sub>) spectroscopy of **5v**

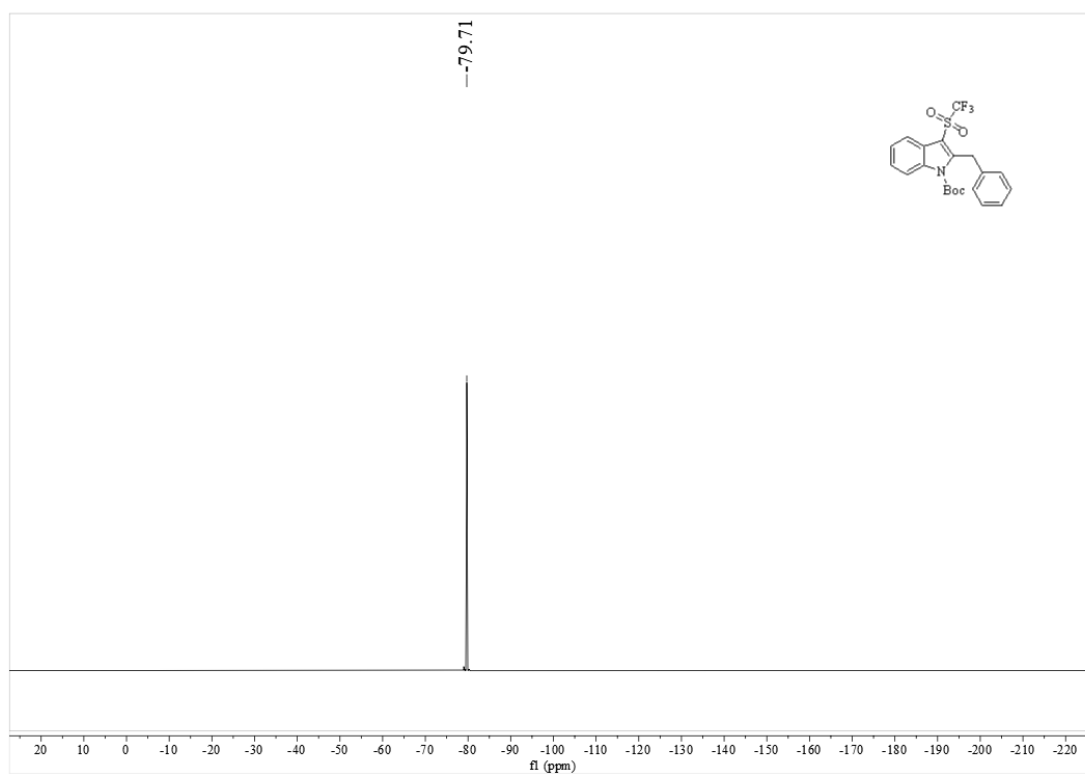

<sup>1</sup>H NMR (400 MHz, CDCl<sub>3</sub>) spectroscopy of **9**

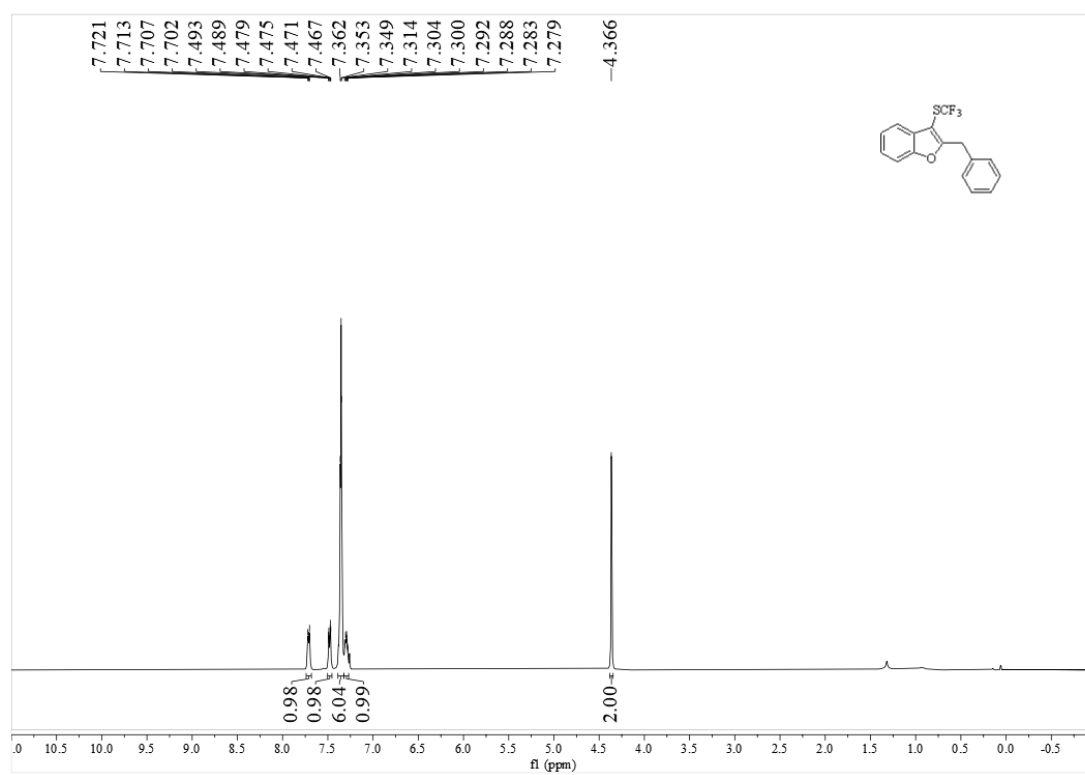

<sup>13</sup>C NMR (100 MHz, CDCl<sub>3</sub>) spectroscopy of **9**

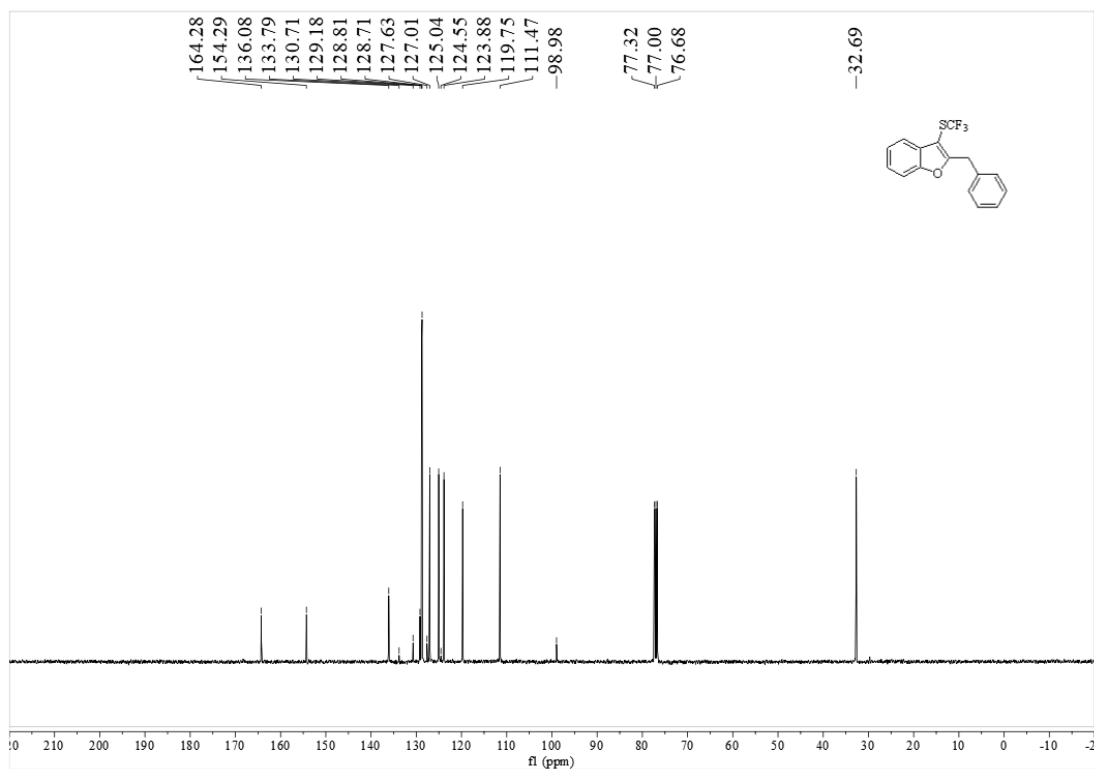

<sup>19</sup>F NMR (376 MHz, CDCl<sub>3</sub>) spectroscopy of **9**

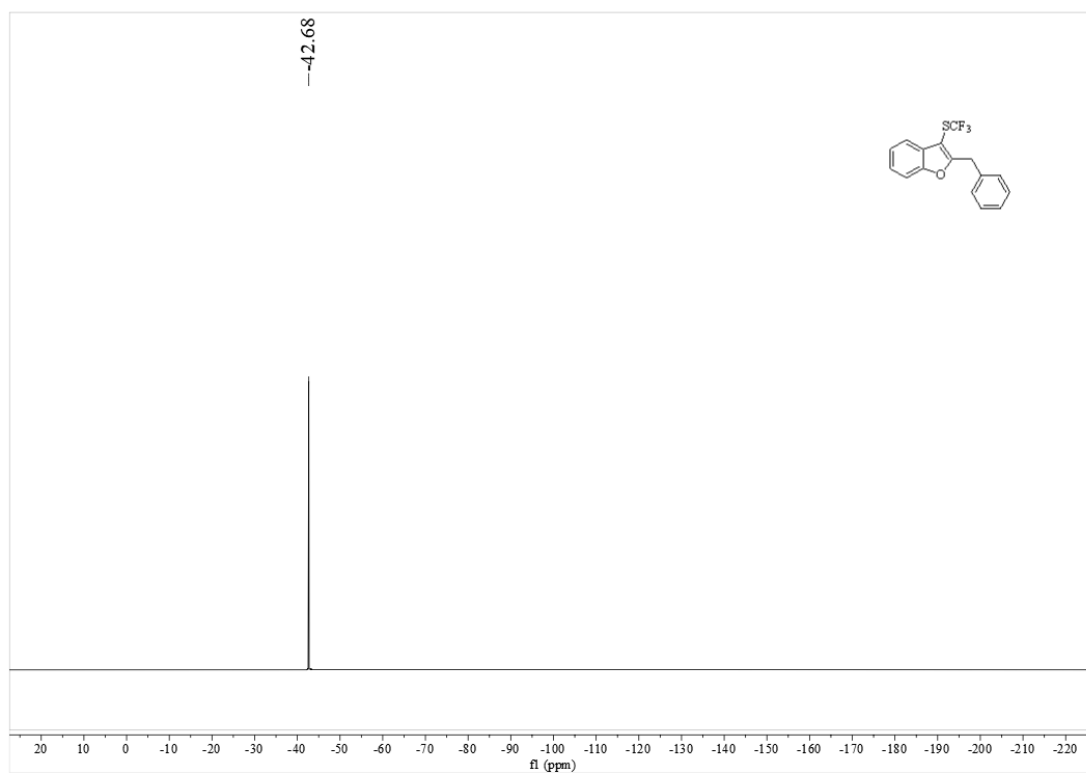

**<sup>1</sup>H NMR (400 MHz, CDCl<sub>3</sub>) spectroscopy of 10**

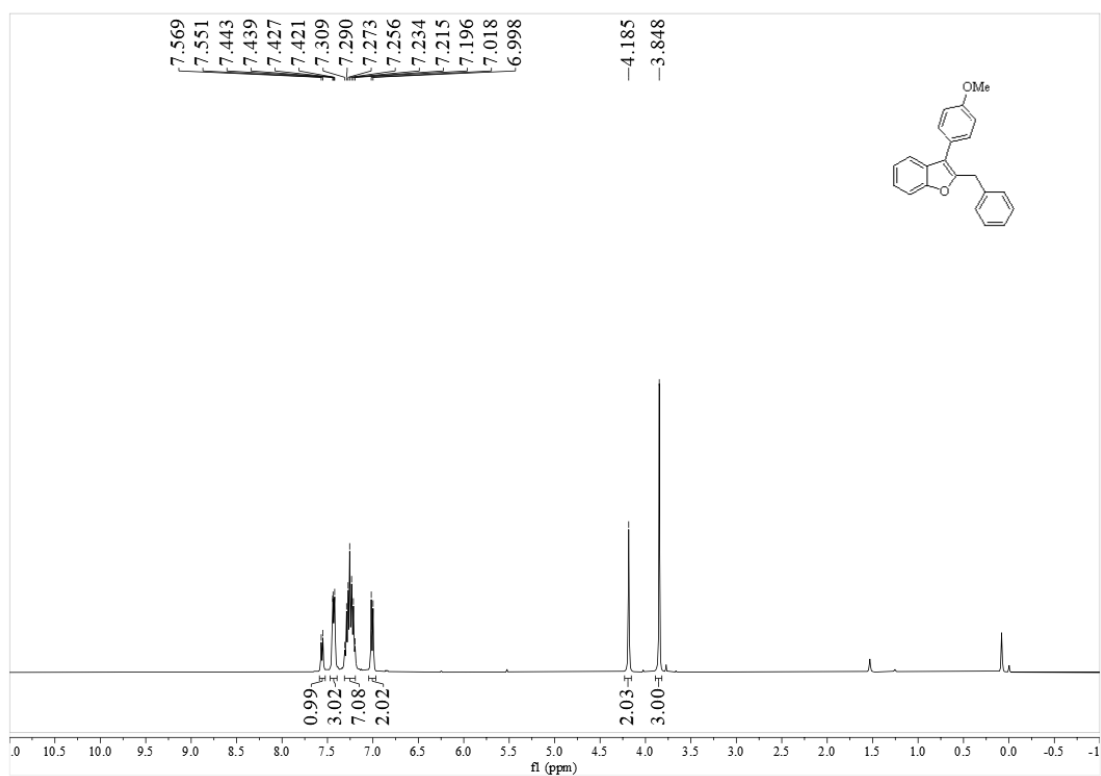

**<sup>13</sup>C NMR (100 MHz, CDCl<sub>3</sub>) spectroscopy of 10**

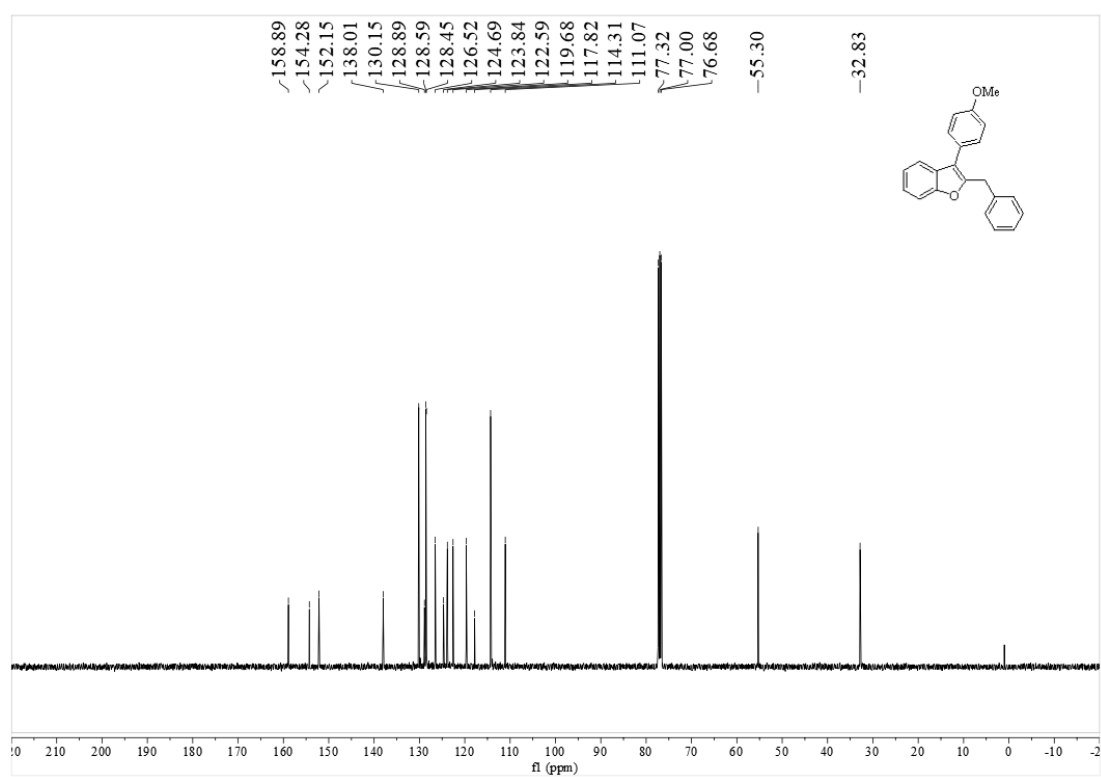

Supplement: d5qo00107b1.pdf [file d5qo00107b1.pdf]
